# Supplementary material for: Suzuki-type cross-coupling of alkyl trifluoroborates with acid fluoride enabled by NHC/photoredox dual catalysis
Source: Royal Society of Chemistry journal article supplement (doi:10.1039/d1sc06102j), 2022-01-01
Supplement: d1sc06102j1.pdf [file d1sc06102j1.pdf]

# **Suzuki-type Cross-Coupling of Alkyl Trifluoroborates with Acid Fluoride Enabled by NHC/Photoredox Dual Catalysis<sup>†</sup>**

Hua Huang,<sup>a, b</sup> Qing-Song Dai,<sup>a</sup> Hai-Jun Leng,<sup>a</sup> Qing-Zhu Li,<sup>a</sup> Si-Lin Yang,<sup>a</sup> Ying-Mao Tao,<sup>a</sup> Xiang Zhang,<sup>a</sup> Ting Qi,<sup>a</sup> Jun-Long Li<sup>a\*</sup>

<sup>a</sup> *Antibiotics Research and Re-evaluation Key Laboratory of Sichuan Province, Sichuan Industrial Institute of Antibiotics, School of Pharmacy, Chengdu University, Chengdu 610106, China.*

<sup>b</sup> *State Key Laboratory of Southwestern Chinese Medicine Resources, School of Pharmacy, Chengdu University of Traditional Chinese Medicine, Chengdu 611137, China.*

## **Supplementary Information**

### **Table of Contents**

|                                                                     |           |
|---------------------------------------------------------------------|-----------|
| <b>1. General Information.....</b>                                  | <b>1</b>  |
| <b>2. Further Optimization Studies.....</b>                         | <b>3</b>  |
| <b>3. General Procedure for the 3. ....</b>                         | <b>5</b>  |
| <b>4. General Procedure for the 5. ....</b>                         | <b>23</b> |
| <b>5. Mechanistic Investigations of the Reaction. ....</b>          | <b>35</b> |
| <b>6. References and Notes.....</b>                                 | <b>46</b> |
| <b>7. Copies of <sup>1</sup>H, <sup>13</sup>C NMR Spectra .....</b> | <b>47</b> |

## 1. General Information

**General Procedures.** All reactions were performed in oven-dried or flame-dried reaction vessels, modified Schlenk flasks, or round-bottom flasks. The flasks were fitted with Teflon screw caps and reactions were conducted under an atmosphere of argon if needed. Gas-tight syringes with stainless steel needles were used to transfer air- and moisture-sensitive liquids. All moisture and/or air sensitive solid compounds were manipulated inside normal desiccators. Flash column chromatography was performed over silica gel (40 – 45  $\mu\text{m}$ , 300 – 400 mesh).

Analytical thin layer chromatography (TLC) was performed on silica gel HSGF<sub>254</sub> glass plates (purchased from Jiangyou silica gel development Co., Ltd, Yantai, China) containing a 254 nm fluorescent indicator. TLC plates were visualized by exposure to short wave ultraviolet light (254 nm) or I<sub>2</sub> and to a solution of KMnO<sub>4</sub> (1 g of KMnO<sub>4</sub>, 6 g of K<sub>2</sub>CO<sub>3</sub> and 0.1 g of KOH in 100 mL of H<sub>2</sub>O) or vanillin (2 g of vanillin and 4 mL of concentrated H<sub>2</sub>SO<sub>4</sub> in 100 mL of EtOH) followed by heating.

Organic solutions were concentrated at 30 – 40 °C on rotary evaporators at ~80 mbar followed by drying on vacuum pump below 1 mbar. Reaction temperatures are reported as the temperature of the bath surrounding the vessel unless otherwise stated.

**Materials.** Commercial reagents and solvents were obtained from Adamas-beta, Aldrich Chemical Co., Alfa Aesar, Macklin, Energy Chemical and Leyan. Acetone were purified by refluxing under positive argon pressure followed by distillation. The benzylic trifluoroborates were synthesized according to the reported literature procedures<sup>[1]</sup>. The benzoyl fluoride were synthesized according to literature procedures<sup>[2]</sup>. Ir(ppy)<sub>2</sub>(dtbbpy)(PF<sub>6</sub>)<sup>[3]</sup> and triazolium salt NHC **1**<sup>[4]</sup> were synthesized according to the literature procedures. The substituted carbazoles were synthesized according to the reported literature procedures<sup>[5]</sup>.

### Instrumentation.

- Proton nuclear magnetic resonance (<sup>1</sup>H NMR) spectra were measured on a JEOL JNM-ECZ600R/S1 spectrometer at ambient temperature for <sup>1</sup>H at 600 MHz. Proton chemical shifts are reported in parts per million ( $\delta$  scale), and are referenced using tetramethylsilane (TMS) as an internal standard or residual protium in the NMR solvent (CDCl<sub>3</sub>:  $\delta$  7.26 (CHCl<sub>3</sub>) or DMSO-*d*<sub>6</sub>:  $\delta$  2.50 (CD<sub>2</sub>H<sub>2</sub>SOCD<sub>3</sub>)). Data are reported as follows: chemical shift [multiplicity (s = singlet, d = doublet, t = triplet, q = quartet, m = multiplet, dd = doublet of doublets, td = triplet of doublets, brs = broad singlet), coupling constant(s) (Hz), integration].

- Carbon-13 nuclear magnetic resonance ( $^{13}\text{C}$  NMR) spectra measured on a JEOL JNM-ECZ600R/S1 spectrometer at ambient temperature for  $^{13}\text{C}$  at 151 MHz.. Carbon chemical shifts are reported in parts per million ( $\delta$  scale), and are referenced using the carbon resonances of the solvent ( $\delta$  77.00 ( $\text{CDCl}_3$ ) or  $\delta$  39.52 ( $\text{DMSO-}d_6$ )). Data are reported as follows: chemical shift [multiplicity (if not singlet), assignment ( $\text{C}_q$  = fully substituted carbon)].
- High resolution mass spectra (HRMS) were performed on an Agilent 6230 time-of-flight (TOF) LC/MS instrument or a Waters SYNAPT G2 mass spectrometer by using an electrospray ionization (ESI) ionization source analyzed by quadrupole time-of-flight (Q-TOF). Melting points were determined on a SGW X-4 digital melting point apparatus and temperatures were not corrected.

## 2. Further Optimization Studies

**Table 1.** Optimization of the benzylic trifluoroborate **1a** and benzoyl fluoride **2a** <sup>a</sup>

| entry | NHC       | PC   | solvent           | base                            | Yield[%] <sup>b</sup> |
|-------|-----------|------|-------------------|---------------------------------|-----------------------|
| 1     | <b>N1</b> | PC 4 | o-Xylene          | Cs <sub>2</sub> CO <sub>3</sub> | 36%                   |
| 2     | <b>N1</b> | PC 4 | m-Xylene          | Cs <sub>2</sub> CO <sub>3</sub> | 20%                   |
| 3     | <b>N1</b> | PC 4 | p-Xylene          | Cs <sub>2</sub> CO <sub>3</sub> | 20%                   |
| 4     | <b>N1</b> | PC 4 | DCE               | Cs <sub>2</sub> CO <sub>3</sub> | 38%                   |
| 5     | <b>N1</b> | PC 4 | CHCl <sub>3</sub> | Cs <sub>2</sub> CO <sub>3</sub> | 44%                   |
| 6     | <b>N1</b> | PC 4 | 1,4-Dioxane       | Cs <sub>2</sub> CO <sub>3</sub> | 36%                   |
| 7     | <b>N1</b> | PC 4 | acetone           | Cs <sub>2</sub> CO <sub>3</sub> | 56%                   |
| 8     | <b>N1</b> | PC 4 | DMSO              | Cs <sub>2</sub> CO <sub>3</sub> | 41%                   |
| 9     | <b>N8</b> | PC 4 | acetone           | Cs <sub>2</sub> CO <sub>3</sub> | N.R. <sup>c</sup>     |

continued

|                 |            |       |                           |                                 |                   |
|-----------------|------------|-------|---------------------------|---------------------------------|-------------------|
| 10              | <b>N9</b>  | PC 4  | acetone                   | Cs <sub>2</sub> CO <sub>3</sub> | 5%                |
| 11              | <b>N10</b> | PC 4  | acetone                   | Cs <sub>2</sub> CO <sub>3</sub> | <5%               |
| 12              | <b>N1</b>  | PC 4  | acetone                   | K <sub>3</sub> PO <sub>4</sub>  | 38%               |
| 13              | <b>N1</b>  | PC 4  | acetone                   | CsHCO <sub>3</sub>              | 37%               |
| 14              | <b>N1</b>  | PC 6  | acetone                   | Cs <sub>2</sub> CO <sub>3</sub> | 46%               |
| 15              | <b>N1</b>  | PC 7  | acetone                   | Cs <sub>2</sub> CO <sub>3</sub> | 60%               |
| 16              | <b>N1</b>  | PC 8  | acetone                   | Cs <sub>2</sub> CO <sub>3</sub> | 56%               |
| 17              | <b>N1</b>  | PC 9  | acetone                   | Cs <sub>2</sub> CO <sub>3</sub> | 61%               |
| 18              | <b>N1</b>  | PC 10 | acetone                   | Cs <sub>2</sub> CO <sub>3</sub> | N.R. <sup>c</sup> |
| 19              | <b>N1</b>  | PC 11 | acetone                   | Cs <sub>2</sub> CO <sub>3</sub> | 44%               |
| 20              | <b>N1</b>  | PC 12 | acetone                   | Cs <sub>2</sub> CO <sub>3</sub> | 12%               |
| 21              | <b>N1</b>  | PC 13 | acetone                   | Cs <sub>2</sub> CO <sub>3</sub> | 10%               |
| 22              | <b>N1</b>  | PC 14 | acetone                   | Cs <sub>2</sub> CO <sub>3</sub> | N.R. <sup>c</sup> |
| 23              | <b>N1</b>  | PC 15 | acetone                   | Cs <sub>2</sub> CO <sub>3</sub> | N.R. <sup>c</sup> |
| 24 <sup>d</sup> | <b>N1</b>  | PC 4  | acetone                   | Cs <sub>2</sub> CO <sub>3</sub> | 39%               |
| 25 <sup>e</sup> | <b>N1</b>  | PC 4  | acetone/H <sub>2</sub> O  | Cs <sub>2</sub> CO <sub>3</sub> | 58%               |
| 26 <sup>f</sup> | <b>N1</b>  | PC 4  | acetone/THF               | Cs <sub>2</sub> CO <sub>3</sub> | 34%               |
| 27 <sup>g</sup> | <b>N1</b>  | PC 4  | acetone/Et <sub>2</sub> O | Cs <sub>2</sub> CO <sub>3</sub> | 51%               |
| 28 <sup>h</sup> | <b>N1</b>  | PC 4  | acetone                   | Cs <sub>2</sub> CO <sub>3</sub> | 52%               |
| 29              | <b>N1</b>  | -     | acetone                   | Cs <sub>2</sub> CO <sub>3</sub> | N.R. <sup>c</sup> |
| 30              | -          | PC 4  | acetone                   | Cs <sub>2</sub> CO <sub>3</sub> | N.R. <sup>c</sup> |
| 31 <sup>i</sup> | <b>N1</b>  | PC 4  | acetone                   | Cs <sub>2</sub> CO <sub>3</sub> | N.R. <sup>c</sup> |

<sup>a</sup> Reactions condition: 1a (0.10 mmol, 1.0 equiv.), 2a (0.20 mmol, 2.0 equiv.), base (0.10 mmol, 1.0 equiv.), PC (2% mmol) and NHC (0.02 mmol, 0.2 equiv.) in solvent (1.0 mL), irradiation with blue LEDs at room temperature. <sup>b</sup> Isolated yield of **3a**. <sup>c</sup> no reaction. <sup>d</sup> 1.5 mL solvent. <sup>e</sup> acetone/H<sub>2</sub>O = 200/1. <sup>f</sup> acetone/THF = 3/1. <sup>g</sup> acetone/Et<sub>2</sub>O = 3/1. <sup>h</sup> 0 °C temperature. <sup>i</sup> no blue LEDs.

**Table 2.** Optimization of reaction conditions for product **5**<sup>a</sup>

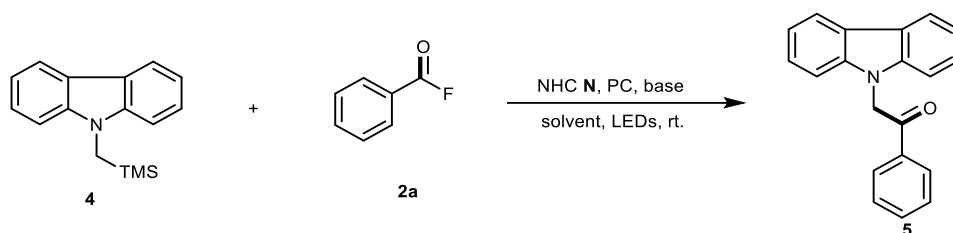

| entry | NHC       | PC   | solvent | base                            | Yield[%] <sup>b</sup> |
|-------|-----------|------|---------|---------------------------------|-----------------------|
| 1     | <b>N1</b> | PC 4 | acetone | Cs <sub>2</sub> CO <sub>3</sub> | 57%                   |
| 2     | <b>N1</b> | PC 5 | acetone | Cs <sub>2</sub> CO <sub>3</sub> | 39%                   |
| 3     | <b>N1</b> | PC 6 | acetone | Cs <sub>2</sub> CO <sub>3</sub> | <5%                   |
| 4     | <b>N1</b> | PC 7 | acetone | Cs <sub>2</sub> CO <sub>3</sub> | 39%                   |

| continued       |    |      |         |                                 |                   |
|-----------------|----|------|---------|---------------------------------|-------------------|
| 5               | N1 | PC 8 | acetone | Cs <sub>2</sub> CO <sub>3</sub> | 28%               |
| 6               | N1 | PC 9 | acetone | Cs <sub>2</sub> CO <sub>3</sub> | 35%               |
| 7               | N1 | PC 4 | Tol     | Cs <sub>2</sub> CO <sub>3</sub> | 77%               |
| 8               | N1 | PC 4 | THF     | Cs <sub>2</sub> CO <sub>3</sub> | 48%               |
| 9               | N1 | PC 4 | MeCN    | Cs <sub>2</sub> CO <sub>3</sub> | 81%               |
| 10              | N1 | PC 4 | DCM     | Cs <sub>2</sub> CO <sub>3</sub> | 46%               |
| 11 <sup>c</sup> | N1 | PC 4 | MeCN    | Cs <sub>2</sub> CO <sub>3</sub> | N.R. <sup>d</sup> |
| 12              | N1 | -    | MeCN    | Cs <sub>2</sub> CO <sub>3</sub> | N.R. <sup>d</sup> |

<sup>a</sup> Reactions condition: **4** (0.10 mmol, 1.0 equiv.), **2a** (0.20 mmol, 2.0 equiv.), base (0.10 mmol, 1.0 equiv.), PC (2% mmol) and NHC (0.02 mmol, 0.2 equiv.) in 1.0 mL of solvent. <sup>b</sup> Isolated yield of **5a**. <sup>c</sup> no blue LEDs.

<sup>d</sup> no reaction.

### 3. General Procedure for the 3.

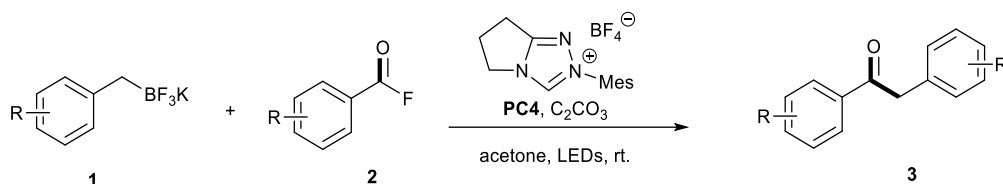

To a flame-dried Schlenk tube were added trifluoroborate **1** (0.10 mmol, 1.0 equiv.), **N1** (0.20 mmol, 0.2 equiv.), photocatalyst **4** (2% mmol) and Cs<sub>2</sub>CO<sub>3</sub> (0.10 mmol, 1.0 equiv.), after which the tube was evacuated and back-filled with argon three times. Subsequently, under the protection of Ar, aroyl fluoride **2** (0.20 mmol, 2.0 equiv.) and acetone (2.0 mL) were added via syringe. The resulting mixture was stirred at ambient temperature for 0.5 - 3 h until the reaction was completed (monitored by TLC), after which the reaction mixture was concentrated under reduced pressure and the resulting crude material was purified by column chromatography on silica gel with petroleum ether and ethyl acetate (100:1 to 80:1) as eluents to afford the desired products. All products were dried under vacuum and further analyzed by <sup>1</sup>H NMR, <sup>13</sup>C NMR, HRMS analysis, *etc.*

### 1,2-diphenylethan-1-one 3a

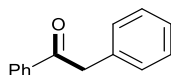

Prepared according to **General Procedure**. The crude product was purified by silica gel chromatography (petroleum ether/ethyl acetate 100:1 to 80:1) to afford (13.9 mg, 71% yield) as a white solid, m.p. = 49 – 51 °C.

*NMR and HRMS data for the product 3a:*

**<sup>1</sup>H NMR (600 MHz, CDCl<sub>3</sub>) δ (ppm):** 8.02 (d, *J* = 8.4 Hz, 2H), 7.56 (tt, *J* = 7.8, *J* = 1.2 Hz, 1H), 7.46 (t, *J* = 8.4 Hz, 2H), 7.33 (t, *J* = 7.8 Hz, 2H), 7.28 – 7.25 (m, 3H), 4.30 (s, 2H).

**<sup>13</sup>C NMR (151 MHz, CDCl<sub>3</sub>) δ (ppm):** 197.6, 136.6, 134.5, 133.1, 129.4, 128.7, 128.6, 128.6, 126.9, 45.5.

**HRMS (ESI-TOF) *m/z*:** [M + Na]<sup>+</sup> Calcd for C<sub>14</sub>H<sub>12</sub>ONa<sup>+</sup> 219.0781; Found: 219.0775.

### 1-phenyl-2-(*p*-tolyl)ethan-1-one 3b

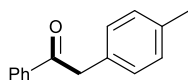

Prepared according to **General Procedure**. The crude product was purified by silica gel chromatography (petroleum ether/ethyl acetate 100:1 to 80:1) to afford (13.9 mg, 66% yield) as a white solid, m.p. = 88 – 93 °C.

*NMR and HRMS data for the product 3b:*

**<sup>1</sup>H NMR (600 MHz, CDCl<sub>3</sub>) δ (ppm):** 8.02 (d, *J* = 7.8 Hz, 2H), 7.55 (t, *J* = 7.2 Hz, 1H), 7.46 (t, *J* = 7.8 Hz, 2H), 7.17 – 7.13 (m, 4H), 4.25 (s, 2H), 2.32 (s, 3H).

**<sup>13</sup>C NMR (151 MHz, CDCl<sub>3</sub>) δ (ppm):** 197.8, 136.6, 136.5, 133.1, 131.4, 129.4, 129.3, 128.6, 45.1, 21.1.

**HRMS (ESI-TOF) *m/z*:** [M + Na]<sup>+</sup> Calcd for C<sub>15</sub>H<sub>14</sub>ONa<sup>+</sup> 233.0937; Found: 233.0934.

### 2-(4-methoxyphenyl)-1-phenylethan-1-one 3c

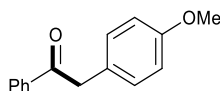

Prepared according to **General Procedure**. The crude product was purified by silica gel chromatography (petroleum ether/ethyl acetate 100:1 to 80:1) to afford (12.7 mg, 56% yield) as a white solid, m.p. = 80 – 84 °C.

*NMR and HRMS data for the product 3c:*

**<sup>1</sup>H NMR (600 MHz, CDCl<sub>3</sub>) δ (ppm):** 8.01 (d, *J* = 6.6 Hz, 2H), 7.55 (t, *J* = 8.4 Hz, 1H), 7.46 (t, *J* = 7.8 Hz, 2H), 7.19 (d, *J* = 9.0 Hz, 2H), 6.87 (d, *J* = 9.0 Hz, 2H), 4.23 (s, 2H), 3.79 (s, 3H).  
**<sup>13</sup>C NMR (151 MHz, CDCl<sub>3</sub>) δ (ppm):** 197.9, 158.5, 136.6, 133.1, 130.4, 128.6, 128.6, 126.5, 114.1, 55.2, 44.6.

**HRMS (ESI-TOF) *m/z*:** [M + Na]<sup>+</sup> Calcd for C<sub>15</sub>H<sub>14</sub>O<sub>2</sub>Na<sup>+</sup> 249.0886; Found: 249.0881.

**2-(4-bromophenyl)-1-phenylethan-1-one 3d**

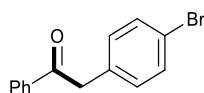

Prepared according to **General Procedure**. The crude product was purified by silica gel chromatography (petroleum ether/ethyl acetate 100:1 to 80:1) to afford (17.1 mg, 62% yield) as a white solid, m.p. = 137 – 141 °C.

*NMR and HRMS data for the product 3d:*

**<sup>1</sup>H NMR (600 MHz, CDCl<sub>3</sub>) δ (ppm):** 8.00 (d, *J* = 6.6 Hz, 2H), 7.58 (t, *J* = 7.2 Hz, 1H), 7.49 – 7.45 (m, 4H), 7.14 (d, *J* = 8.4 Hz, 2H), 4.25 (s, 2H).

**<sup>13</sup>C NMR (151 MHz, CDCl<sub>3</sub>) δ (ppm):** 197.0, 136.4, 133.4, 133.4, 131.7, 131.2, 128.7, 128.5, 120.9, 44.7.

**HRMS (ESI-TOF) *m/z*:** [M + Na]<sup>+</sup> Calcd for C<sub>14</sub>H<sub>11</sub>BrONa<sup>+</sup> 296.9885 (<sup>79</sup>Br), 298.9865 (<sup>81</sup>Br); Found: 296.9877, 298.9866.

**2-(3-fluorophenyl)-1-phenylethan-1-one 3e**

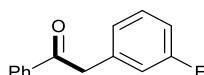

Prepared according to **General Procedure**. The crude product was purified by silica gel chromatography (petroleum ether/ethyl acetate 100:1 to 80:1) to afford (14.6 mg, 68% yield) as semisolid.

*NMR and HRMS data for the product 3e:*

**<sup>1</sup>H NMR (600 MHz, CDCl<sub>3</sub>) δ (ppm):** 8.01 (d, *J* = 8.4 Hz, 2H), 7.58 (t, *J* = 7.8 Hz, 1H), 7.48 (t, *J* = 8.4 Hz, 2H), 7.31 – 7.28 (m, 1H), 7.04 (d, *J* = 7.8 Hz, 1H), 7.00 – 6.94 (m, 2H), 4.29 (s, 2H).

**<sup>13</sup>C NMR (151 MHz, CDCl<sub>3</sub>) δ (ppm):** 196.9, 162.9 (C-F, <sup>1</sup>*J*<sub>C-F</sub> = 244.5 Hz), 136.8 (C-F, <sup>3</sup>*J*<sub>C-F</sub> = 9.0 Hz), 136.4, 133.4, 130.0 (C-F, <sup>3</sup>*J*<sub>C-F</sub> = 7.5 Hz), 128.7, 128.5, 125.2, 116.5 (C-F, <sup>2</sup>*J*<sub>C-F</sub> = 21.0 Hz), 113.9 (C-F, <sup>2</sup>*J*<sub>C-F</sub> = 22.5 Hz), 45.0.

**HRMS (ESI-TOF) *m/z*:** [M + Na]<sup>+</sup> Calcd for C<sub>14</sub>H<sub>11</sub>FONa<sup>+</sup> 237.0687; Found: 237.0693.



$^{19}\text{F}$  NMR (564 MHz,  $\text{CDCl}_3$ )  $\delta$  (ppm): -113.47 (s, 1F).

**1-phenyl-2-(o-tolyl)ethan-1-one 3f**

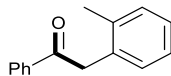

Prepared according to **General Procedure**. The crude product was purified by silica gel chromatography (petroleum ether/ethyl acetate 100:1 to 80:1) to afford (12.6 mg, 60% yield) as a white solid, m.p. = 59 – 64 °C.

*NMR and HRMS data for the product 3f:*

$^1\text{H}$  NMR (600 MHz,  $\text{CDCl}_3$ )  $\delta$  (ppm): 8.04 (d,  $J$  = 7.8 Hz, 2H), 7.59 (t,  $J$  = 7.8 Hz, 1H), 7.49 (t,  $J$  = 7.8 Hz, 1H), 7.23 – 7.13 (m, 4H), 4.32 (s, 2H), 2.27 (s, 3H).

$^{13}\text{C}$  NMR (151 MHz,  $\text{CDCl}_3$ )  $\delta$  (ppm): 197.5, 136.9, 133.4, 133.1, 130.3, 130.3, 128.7, 128.3, 127.2, 126.1, 43.5, 19.8.

HRMS (ESI-TOF)  $m/z$ :  $[\text{M} + \text{Na}]^+$  Calcd for  $\text{C}_{15}\text{H}_{14}\text{ONa}^+$  233.0937; Found: 233.0941.

**2-(2-fluorophenyl)-1-phenylethan-1-one 3g**

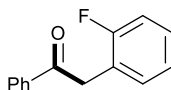

Prepared according to **General Procedure**. The crude product was purified by silica gel chromatography (petroleum ether/ethyl acetate 100:1 to 80:1) to afford (10.7 mg, 50% yield) as a white solid, m.p. = 66 – 70 °C.

*NMR and HRMS data for the product 3g:*

$^1\text{H}$  NMR (600 MHz,  $\text{CDCl}_3$ )  $\delta$  (ppm): 8.04 (d,  $J$  = 7.8 Hz, 2H), 7.59 (t,  $J$  = 7.2 Hz, 1H), 7.49 (t,  $J$  = 8.4 Hz, 2H), 7.29 – 7.23 (m, 2H), 7.13 – 7.07 (m, 2H), 4.34 (s, 2H).

$^{13}\text{C}$  NMR (151 MHz,  $\text{CDCl}_3$ )  $\delta$  (ppm): 196.3, 160.9 (C-F,  $^1J_{\text{C-F}}$  = 244.5 Hz), 136.4, 133.3, 131.6, 128.9 (C-F,  $^3J_{\text{C-F}}$  = 7.5 Hz), 128.7, 128.4, 124.1, 121.8 (d,  $^2J_{\text{C-F}}$  = 16.5 Hz), 115.4 (C-F,  $^2J_{\text{C-F}}$  = 21.0 Hz), 38.6.

HRMS (ESI-TOF)  $m/z$ :  $[\text{M} + \text{H}]^+$  Calcd for  $\text{C}_{14}\text{H}_{11}\text{FOH}^+$  215.0867; Found: 215.0865.

$^{19}\text{F}$  NMR (564 MHz,  $\text{CDCl}_3$ )  $\delta$  (ppm): -117.57 – -117.61 (m, 1F).

**2-(3,4-difluorophenyl)-1-phenylethan-1-one 3h**

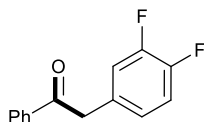

Prepared according to **General Procedure**. The crude product was purified by silica gel chromatography (petroleum ether/ethyl acetate 100:1 to 80:1) to afford (13.5 mg, 58% yield) as a white solid, m.p. = 74 – 78 °C.

*NMR and HRMS data for the product 3h:*

**<sup>1</sup>H NMR (600 MHz, CDCl<sub>3</sub>) δ (ppm):** 8.00 (d, *J* = 7.8 Hz, 2H), 7.59 (t, *J* = 7.2, 1H), 7.49 (t, *J* = 8.4, 2H), 7.14 – 7.07 (m, 2H), 6.98 – 6.96 (m, 1H), 4.25 (s, 2H).

**<sup>13</sup>C NMR (151 MHz, CDCl<sub>3</sub>) δ (ppm):** 196.7, 150.2 (C-F, <sup>1</sup>*J*<sub>C-F</sub> = 246.8, <sup>2</sup>*J*<sub>C-F</sub> = 13.5 Hz), 149.5 (C-F, <sup>1</sup>*J*<sub>C-F</sub> = 245.3, <sup>2</sup>*J*<sub>C-F</sub> = 12.0 Hz), 136.2, 133.5, 131.2 (C-F, <sup>3</sup>*J*<sub>C-F</sub> = 6.0 Hz), 128.8, 128.4, 125.6 (C-F, <sup>3</sup>*J*<sub>C-F</sub> = 4.5 Hz), 118.6 (C-F, <sup>2</sup>*J*<sub>C-F</sub> = 16.5 Hz), 117.3 (C-F, <sup>2</sup>*J*<sub>C-F</sub> = 18.0 Hz), 44.3.

**HRMS (ESI-TOF) *m/z*:** [M + Na]<sup>+</sup> Calcd for C<sub>14</sub>H<sub>10</sub>F<sub>2</sub>ONa<sup>+</sup> 255.0592; Found: 255.0596.

**<sup>19</sup>F NMR (564 MHz, CDCl<sub>3</sub>) δ (ppm):** -137.99 – -138.07 (m, 1F), -140.84 – -140.91 (m, 1F).

**2-([1,1'-biphenyl]-4-yl)-1-phenylethan-1-one 3i**

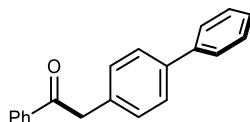

Prepared according to **General Procedure**. The crude product was purified by silica gel chromatography (petroleum ether/ethyl acetate 100:1 to 80:1) to afford (13.6 mg, 50% yield) as a white solid, m.p. = 142 – 146 °C.

*NMR and HRMS data for the product 3i:*

**<sup>1</sup>H NMR (600 MHz, CDCl<sub>3</sub>) δ (ppm):** 8.05 (d, *J* = 7.2 Hz, 2H), 7.59 – 7.56 (m, 5H), 7.48 (t, *J* = 7.8 Hz, 2H), 7.43 (t, *J* = 7.8 Hz, 2H), 7.36 – 7.33 (m, 3H), 4.34 (s, 2H).

**<sup>13</sup>C NMR (151 MHz, CDCl<sub>3</sub>) δ (ppm):** 197.6, 140.8, 139.9, 136.6, 133.5, 133.2, 129.9, 128.7, 128.7, 128.6, 127.4, 127.2, 127.1, 45.1.

**HRMS (ESI-TOF) *m/z*:** [M + Na]<sup>+</sup> Calcd for C<sub>20</sub>H<sub>16</sub>ONa<sup>+</sup> 295.1093; Found: 295.1099.

**1-([1,1'-biphenyl]-4-yl)-2-phenylethan-1-one 3j**

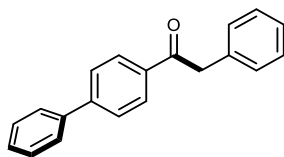

Prepared according to **General Procedure**. The crude product was purified by silica gel chromatography (petroleum ether/ethyl acetate 100:1 to 80:1) to afford (22.1 mg, 81% yield) as a white solid, m.p. = 132 – 136 °C.

*NMR and HRMS data for the product 3j:*

**<sup>1</sup>H NMR (600 MHz, CDCl<sub>3</sub>) δ (ppm):** 8.10 (d, *J* = 8.4 Hz, 2H), 7.68 (d, *J* = 8.4 Hz, 2H), 7.62 (d, *J* = 6.6 Hz, 2H), 7.47 (t, *J* = 7.8 Hz, 2H), 7.41 (t, *J* = 7.2 Hz, 1H), 7.35 (t, *J* = 7.8 Hz, 2H), 7.30 (d, *J* = 6.6 Hz, 2H), 7.27 (d, *J* = 7.8 Hz, 1H), 4.33 (s, 2H).

**<sup>13</sup>C NMR (151 MHz, CDCl<sub>3</sub>) δ (ppm):** 197.2, 145.8, 139.8, 135.2, 134.6, 129.4, 129.2, 128.9, 128.7, 128.2, 127.3, 127.3, 126.9, 45.6.

**HRMS (ESI-TOF) *m/z*:** [M + Na]<sup>+</sup> Calcd for C<sub>20</sub>H<sub>16</sub>ONa<sup>+</sup> 295.1093; Found: 295.1098.

**1-([1,1'-biphenyl]-4-yl)-2-(*m*-tolyl)ethan-1-one 3k**

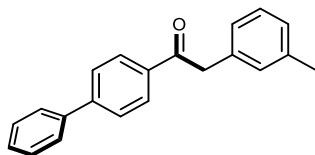

Prepared according to **General Procedure**. The crude product was purified by silica gel chromatography (petroleum ether/ethyl acetate 100:1 to 80:1) to afford (20.0 mg, 70% yield) as a white solid, m.p. = 81 – 84 °C.

*NMR and HRMS data for the product 3k:*

**<sup>1</sup>H NMR (600 MHz, CDCl<sub>3</sub>) δ (ppm):** 8.10 (d, *J* = 8.4 Hz, 2H), 7.69 (d, *J* = 8.4 Hz, 2H), 7.63 (d, *J* = 8.4 Hz, 2H), 7.48 (t, *J* = 7.8 Hz, 2H), 7.41 (t, *J* = 7.8 Hz, 1H), 7.24 (t, *J* = 7.2 Hz, 1H), 7.13 – 7.08 (m, 3H), 4.29 (s, 2H), 2.35 (s, 3H).

**<sup>13</sup>C NMR (151 MHz, CDCl<sub>3</sub>) δ (ppm):** 197.3, 145.8, 139.8, 138.3, 135.3, 134.5, 130.1, 129.2, 128.9, 128.6, 128.2, 127.7, 127.2, 126.4, 45.5, 21.4.

**HRMS (ESI-TOF) *m/z*:** [M + Na]<sup>+</sup> Calcd for C<sub>21</sub>H<sub>18</sub>ONa<sup>+</sup> 309.1250; Found: 309.1254.

**1-([1,1'-biphenyl]-4-yl)-2-(3-methoxyphenyl)ethan-1-one 3l**

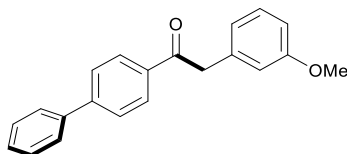

Prepared according to **General Procedure**. The crude product was purified by silica gel chromatography (petroleum ether/ethyl acetate 100:1 to 80:1) to afford (19.4 mg, 64% yield) as a white solid, m.p. = 57 – 59 °C.

*NMR and HRMS data for the product 3l:*

**<sup>1</sup>H NMR (600 MHz, CDCl<sub>3</sub>) δ (ppm):** 8.08 (d, *J* = 8.4 Hz, 2H), 7.67 (d, *J* = 9.0 Hz, 2H), 7.61 (d, *J* = 7.2 Hz, 2H), 7.47 – 7.45 (m, 2H), 7.39 (t, *J* = 7.2 Hz, 1H), 7.25 – 7.23 (m, 1H), 6.88 (d, *J* = 7.2 Hz, 1H), 6.84 (s, 1H), 6.80 (d, *J* = 8.4 Hz, 1H), 4.28 (s, 2H), 3.79 (s, 3H).

**<sup>13</sup>C NMR (151 MHz, CDCl<sub>3</sub>) δ (ppm):** 197.1, 159.8, 145.8, 139.8, 136.1, 135.2, 129.7, 129.2, 128.9, 128.2, 127.3, 127.2, 121.8, 115.1, 112.4, 55.2, 45.6.

**HRMS (ESI-TOF) *m/z*:** [M + Na]<sup>+</sup> Calcd for C<sub>21</sub>H<sub>18</sub>O<sub>2</sub>Na<sup>+</sup> 325.1199; Found: 325.1196.

**1-([1,1'-biphenyl]-4-yl)-2-(3-chlorophenyl)ethan-1-one 3m**

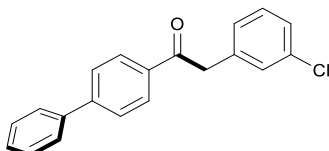

Prepared according to **General Procedure**. The crude product was purified by silica gel chromatography (petroleum ether/ethyl acetate 100:1 to 80:1) to afford (20.0 mg, 65% yield) as a white solid, m.p. = 107 – 110 °C.

*NMR and HRMS data for the product 3m:*

**<sup>1</sup>H NMR (600 MHz, CDCl<sub>3</sub>) δ (ppm):** 8.08 (d, *J* = 8.4 Hz, 2H), 7.70 (d, *J* = 7.8 Hz, 2H), 7.63 (d, *J* = 7.8 Hz, 2H), 7.48 (t, *J* = 7.8 Hz, 2H), 7.41 (t, *J* = 7.2 Hz, 1H), 7.30 – 7.25 (m, 3H), 7.18 (d, *J* = 7.2 Hz, 1H), 4.29 (s, 2H).

**<sup>13</sup>C NMR (151 MHz, CDCl<sub>3</sub>) δ (ppm):** 196.4, 146.1, 139.7, 136.4, 135.0, 134.4, 129.84, 129.6, 129.1, 129.0, 128.3, 127.7, 127.4, 127.3, 127.2, 44.9.

**HRMS (ESI-TOF) *m/z*:** [M + Na]<sup>+</sup> Calcd for C<sub>20</sub>H<sub>15</sub>ClONa<sup>+</sup> 329.0704 (<sup>35</sup>Cl), 331.0674 (<sup>37</sup>Cl); Found: 329.0702, 331.0681.

**1-([1,1'-biphenyl]-4-yl)-2-(3,5-dimethylphenyl)ethan-1-one 3n**

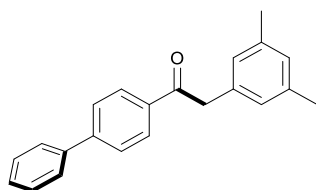

Prepared according to **General Procedure**. The crude product was purified by silica gel chromatography (petroleum ether/ethyl acetate 100:1 to 80:1) to afford (21.1 mg, 70% yield) as a white solid, m.p. = 62 – 63 °C.

*NMR and HRMS data for the product 3n:*

**<sup>1</sup>H NMR (600 MHz, CDCl<sub>3</sub>) δ (ppm):** 8.10 (d, *J* = 8.4 Hz, 2H), 7.69 (d, *J* = 9.0 Hz, 2H), 7.63 (d, *J* = 8.4 Hz, 2H), 7.48 (t, *J* = 7.8 Hz, 2H), 7.42 – 7.40 (m, 1H), 6.93 (s, 2H), 6.91 (s, 1H), 4.24 (s, 2H), 2.31 (s, 6H).

**<sup>13</sup>C NMR (151 MHz, CDCl<sub>3</sub>) δ (ppm):** 197.5, 145.7, 139.8, 138.2, 135.3, 134.4, 129.3, 128.9, 128.6, 128.2, 127.2, 127.2, 45.5, 21.3.

**HRMS (ESI-TOF) *m/z*:** [M + Na]<sup>+</sup> Calcd for C<sub>22</sub>H<sub>20</sub>ONa<sup>+</sup> 323.1406; Found: 323.1408.

**2-(naphthalen-2-yl)-1-phenylethan-1-one 3o**

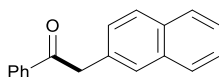

Prepared according to **General Procedure**. The crude product was purified by silica gel chromatography (petroleum ether/ethyl acetate 100:1 to 80:1) to afford (10.6 mg, 43% yield) as a white solid, m.p. = 113 – 118 °C.

*NMR and HRMS data for the product 3o:*

**<sup>1</sup>H NMR (600 MHz, CDCl<sub>3</sub>) δ (ppm):** 8.06 (d, *J* = 7.2 Hz, 2H), 7.82 – 7.78 (m, 3H), 7.73 (s, 1H), 7.56 (t, *J* = 7.2 Hz, 1H), 7.48 – 7.43 (m, 4H), 7.41 – 7.40 (m, 1H), 4.46 (s, 2H).

**<sup>13</sup>C NMR (151 MHz, CDCl<sub>3</sub>) δ (ppm):** 197.7, 136.6, 133.6, 133.2, 132.4, 132.1, 128.7, 128.3, 128.1, 127.6, 127.6, 127.6, 126.1, 125.7, 45.7.

**HRMS (ESI-TOF) *m/z*:** [M + Na]<sup>+</sup> Calcd for C<sub>18</sub>H<sub>14</sub>ONa<sup>+</sup> 269.0937; Found: 269.0941.

**(2,3-dihydro-1H-inden-2-yl)(phenyl)methanone 3p**

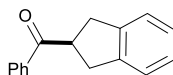

Prepared according to **General Procedure**. The crude product was purified by silica gel chromatography (petroleum ether/ethyl acetate 100:1 to 80:1) to afford (4.9 mg, 22% yield) as a white solid, m.p. = 59 – 63 °C.

*NMR and HRMS data for the product 3p:*

**<sup>1</sup>H NMR (600 MHz, CDCl<sub>3</sub>) δ (ppm):** 8.03 (d, *J* = 6.6 Hz, 2H), 7.61 – 7.59 (m, 1H), 7.52 – 7.50 (m, 2H), 7.27 – 7.18 (m, 4H), 7.34 – 7.29 (m, 1H), 3.42 – 3.38 (m, 2H), 3.30 – 3.26 (m, 2H).

**<sup>13</sup>C NMR (151 MHz, CDCl<sub>3</sub>) δ (ppm):** 200.9, 141.6, 136.4, 133.0, 128.7, 128.5, 126.6, 124.4, 46.3, 36.2.

**HRMS (ESI-TOF) *m/z*:** [M + Na]<sup>+</sup> Calcd for C<sub>16</sub>H<sub>14</sub>ONa<sup>+</sup> 245.0937; Found: 245.0935.

**3-(4-(tert-butyl)phenyl)-1-phenylpropan-1-one 3q**

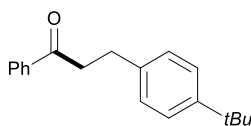

Prepared according to **General Procedure**. The crude product was purified by silica gel chromatography (petroleum ether/ethyl acetate 200:1) to afford (6.1 mg, 23% yield) as colorless oil.

*NMR and HRMS data for the product 3q:*

**<sup>1</sup>H NMR (600 MHz, CDCl<sub>3</sub>) δ (ppm):** 8.04 (d, *J* = 7.8 Hz, 1H), 7.97 (d, *J* = 7.8 Hz, 2H), 7.56 (t, *J* = 7.2 Hz, 1H), 7.47 – 7.43 (m, 2H), 7.36 – 7.32 (m, 2H), 7.23 (d, *J* = 8.4 Hz, 1H), 7.20 (d, *J* = 8.4 Hz, 1H), 4.52 (t, *J* = 7.2 Hz, 1H), 3.31 (t, *J* = 7.8 Hz, 1H), 3.07 – 3.03 (m, 2H), 1.32 (s, 9H).

**<sup>13</sup>C NMR (151 MHz, CDCl<sub>3</sub>) δ (ppm):** 199.4, 133.0, 129.6, 128.6, 128.6, 128.3, 128.1, 128.0, 125.4, 40.5, 34.7, 31.4, 29.6.

**HRMS (ESI-TOF) *m/z*:** [M + Na]<sup>+</sup> Calcd for C<sub>19</sub>H<sub>22</sub>ONa<sup>+</sup> 289.1563; Found: 289.11564.

**1-(4-ethylphenyl)-2-phenylethan-1-one 3r**

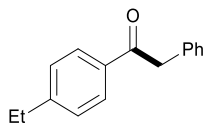

Prepared according to **General Procedure**. The crude product was purified by silica gel chromatography (petroleum ether/ethyl acetate 100:1 to 80:1) to afford (14.6 mg, 65% yield) as a white solid, m.p. = 54 – 57 °C.

*NMR and HRMS data for the product 3r:*

**<sup>1</sup>H NMR (600 MHz, CDCl<sub>3</sub>) δ (ppm):** 7.95 (d, *J* = 8.4 Hz, 2H), 7.32 (t, *J* = 7.2 Hz, 2H), 7.29 – 7.24 (m, 5H), 4.27 (s, 2H), 2.70 (q, *J* = 7.8 Hz, 2H), 1.26 (t, *J* = 7.8 Hz, 3H).

**<sup>13</sup>C NMR (151 MHz, CDCl<sub>3</sub>) δ (ppm):** 197.3, 150.1, 134.8, 134.3, 129.4, 128.9, 128.6, 128.1, 126.8, 45.4, 28.9, 15.1.

**HRMS (ESI-TOF) *m/z*:** [M + Na]<sup>+</sup> Calcd for C<sub>16</sub>H<sub>16</sub>ONa<sup>+</sup> 247.1093; Found: 247.1093.

**1-(4-methoxyphenyl)-2-phenylethan-1-one 3s**

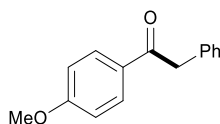

Prepared according to **General Procedure**. The crude product was purified by silica gel chromatography (petroleum ether/ethyl acetate 100:1 to 80:1) to afford (12.0 mg, 53% yield) as a white solid, m.p. = 62 – 64 °C.

*NMR and HRMS data for the product 3s:*

**<sup>1</sup>H NMR (600 MHz, CDCl<sub>3</sub>) δ (ppm):** 8.00 (d, *J* = 9.0 Hz, 2H), 7.32 (d, *J* = 7.2 Hz, 2H), 7.28 – 7.23 (m, 3H), 6.93 (d, *J* = 9.0 Hz, 2H), 4.24 (s, 2H), 3.86 (s, 3H).

**<sup>13</sup>C NMR (151 MHz, CDCl<sub>3</sub>) δ (ppm):** 196.2, 163.5, 135.0, 130.9, 129.6, 129.4, 128.6, 126.8, 113.8, 55.5, 45.3.

**HRMS (ESI-TOF) *m/z*:** [M + Na]<sup>+</sup> Calcd for C<sub>15</sub>H<sub>14</sub>O<sub>2</sub>Na<sup>+</sup> 249.0886; Found: 249.0881.

**1-(4-chlorophenyl)-2-phenylethan-1-one 3t**

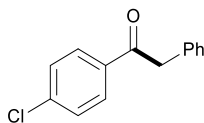

Prepared according to **General Procedure**. The crude product was purified by silica gel chromatography (petroleum ether/ethyl acetate 100:1 to 80:1) to afford (15.3 mg, 66% yield) as a white solid, m.p. = 97 – 100 °C.

*NMR and HRMS data for the product 3t:*

**<sup>1</sup>H NMR (600 MHz, CDCl<sub>3</sub>) δ (ppm):** 7.95 (d, *J* = 9.0 Hz, 2H), 7.43 (d, *J* = 9.0 Hz, 2H), 7.33 (t, *J* = 7.8 Hz, 2H), 7.27 – 7.25 (m, 3H), 4.26 (s, 2H).

**<sup>13</sup>C NMR (151 MHz, CDCl<sub>3</sub>) δ (ppm):** 196.4, 139.6, 134.9, 134.2, 130.0, 129.4, 129.0, 128.8, 127.0, 45.5.

**HRMS (ESI-TOF) *m/z*:** [M + Na]<sup>+</sup> Calcd for C<sub>14</sub>H<sub>11</sub>ClONa<sup>+</sup> 253.0391 (<sup>35</sup>Cl), 255.0361 (<sup>37</sup>Cl); Found: 253.0391, 255.0359.

**1-(4-bromophenyl)-2-phenylethan-1-one 3u**

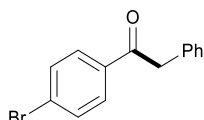

Prepared according to **General Procedure**. The crude product was purified by silica gel chromatography (petroleum ether/ethyl acetate 100:1 to 80:1) to afford (14.1 mg, 51% yield) as a white solid, m.p. = 105 – 107 °C.

*NMR and HRMS data for the product 3u:*

**<sup>1</sup>H NMR (600 MHz, CDCl<sub>3</sub>) δ (ppm):** 7.87 (d, *J* = 9.0 Hz, 2H), 7.59 (d, *J* = 9.0 Hz, 2H), 7.33 (t, *J* = 7.8 Hz, 2H), 7.27 – 7.24 (m, 3H), 4.25 (s, 2H).

**<sup>13</sup>C NMR (151 MHz, CDCl<sub>3</sub>) δ (ppm):** 196.6, 135.2, 134.1, 132.0, 130.1, 129.4, 128.8, 128.4, 127.0, 45.5.

**HRMS (ESI-TOF) *m/z*:** [M + Na]<sup>+</sup> Calcd for C<sub>14</sub>H<sub>11</sub>BrONa<sup>+</sup> 296.9885 (<sup>79</sup>Br), 298.9865 (<sup>81</sup>Br); Found: 296.9884, 296.9864.



**2-phenyl-1-(*m*-tolyl)ethan-1-one 3v**

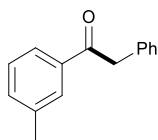

Prepared according to **General Procedure**. The crude product was purified by silica gel chromatography (petroleum ether/ethyl acetate 100:1 to 80:1) to afford (13.5 mg, 64% yield) as a white solid, m.p. = 35 – 40 °C.

*NMR and HRMS data for the product 3v:*

**<sup>1</sup>H NMR (600 MHz, CDCl<sub>3</sub>) δ (ppm):** 7.83 – 7.81 (m, 2H), 7.38 – 7.32 (m, 4H), 7.27 – 7.24 (m, 3H), 4.28 (s, 2H), 2.41 (s, 3H).

**<sup>13</sup>C NMR (151 MHz, CDCl<sub>3</sub>) δ (ppm):** 197.8, 138.4, 136.6, 134.6, 133.9, 129.5, 129.1, 128.6, 128.5, 126.8, 125.9, 45.5, 21.4.

**HRMS (ESI-TOF) *m/z*:** [M + Na]<sup>+</sup> Calcd for C<sub>15</sub>H<sub>14</sub>OH<sup>+</sup> 211.1117; Found: 211.1121.

**1-(3-chlorophenyl)-2-phenylethan-1-one 3w**

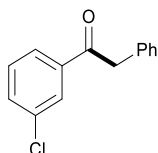

Prepared according to **General Procedure**. The crude product was purified by silica gel chromatography (petroleum ether/ethyl acetate 100:1 to 80:1) to afford (11.6 mg, 50% yield) as a white solid, m.p. = 50 – 53 °C.

*NMR and HRMS data for the product 3w:*

**<sup>1</sup>H NMR (600 MHz, CDCl<sub>3</sub>) δ (ppm):** 7.98 (s, 1H), 7.88 (d, *J* = 7.2 Hz, 1H), 7.53 (d, *J* = 7.2 Hz, 1H), 7.40 (t, *J* = 8.4 Hz, 1H), 7.34 (t, *J* = 7.8 Hz, 2H), 7.28 – 7.25 (m, 3H), 4.26 (s, 2H).

**<sup>13</sup>C NMR (151 MHz, CDCl<sub>3</sub>) δ (ppm):** 196.3, 138.1, 135.0, 133.9, 133.1, 130.0, 129.4, 128.8, 128.7, 127.1, 126.7, 45.6.

**HRMS (ESI-TOF) *m/z*:** [M + Na]<sup>+</sup> Calcd for C<sub>14</sub>H<sub>11</sub>ClONa<sup>+</sup> 253.0391 (<sup>35</sup>Cl), 255.0361 (<sup>37</sup>Cl); Found: 253.0398, 255.0371.

**1-(3-bromophenyl)-2-phenylethan-1-one 3x**

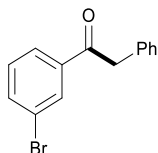

Prepared according to **General Procedure**. The crude product was purified by silica gel chromatography (petroleum ether/ethyl acetate 100:1 to 80:1) to afford (14.6 mg, 53% yield) as colorless oil.

*NMR and HRMS data for the product 3x:*

**<sup>1</sup>H NMR (600 MHz, CDCl<sub>3</sub>) δ (ppm):** 7.77 (d, *J* = 4.2 Hz, 1H), 7.64 (d, *J* = 4.2 Hz, 1H), 7.34 – 7.31 (m, 4H), 7.28 – 7.25 (m, 2H), 7.13 – 7.12 (m, 1H), 4.20 (s, 2H).

**<sup>13</sup>C NMR (151 MHz, CDCl<sub>3</sub>) δ (ppm):** 190.4, 143.9, 134.3, 134.0, 132.6, 129.4, 128.7, 128.2, 127.0, 46.4.

**HRMS (ESI-TOF) *m/z*:** [M + H]<sup>+</sup> Calcd for C<sub>14</sub>H<sub>11</sub>BrOH<sup>+</sup> 275.0066 (<sup>79</sup>Br), 277.0046 (<sup>81</sup>Br); Found: 275.0065, 277.0045.

**2-phenyl-1-(*o*-tolyl)ethan-1-one 3y**

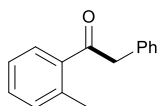

Prepared according to **General Procedure**. The crude product was purified by silica gel chromatography (petroleum ether/ethyl acetate 100:1 to 80:1) to afford (9.7 mg, 46% yield) as colorless oil.

*NMR and HRMS data for the product 3y:*

**<sup>1</sup>H NMR (600 MHz, CDCl<sub>3</sub>) δ (ppm):** 7.72 (d, *J* = 7.8 Hz, 1H), 7.38 – 7.35 (m, 1H), 7.33 – 7.31 (m, 2H), 7.27 – 7.23 (m, 5H), 4.22 (s, 2H), 2.45 (s, 3H).

**<sup>13</sup>C NMR (151 MHz, CDCl<sub>3</sub>) δ (ppm):** 201.4, 138.5, 137.6, 134.4, 132.0, 131.3, 129.5, 128.6, 126.9, 125.6, 48.4, 21.3.

**HRMS (ESI-TOF) *m/z*:** [M + Na]<sup>+</sup> Calcd for C<sub>15</sub>H<sub>14</sub>OH<sup>+</sup> 211.1117; Found: 211.1116.

**1-(2-methoxyphenyl)-2-phenylethan-1-one 3z**

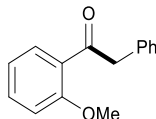

Prepared according to **General Procedure**. The crude product was purified by silica gel chromatography (petroleum ether/ethyl acetate 100:1 to 80:1) to afford (13.8 mg, 61% yield) as colorless oil.

*NMR and HRMS data for the product 3z:*

**<sup>1</sup>H NMR (600 MHz, CDCl<sub>3</sub>) δ (ppm):** 7.67 (d, *J* = 8.4 Hz, 1H), 7.45 (t, *J* = 8.4 Hz, 1H), 7.30 (t, *J* = 7.8 Hz, 2H), 7.23 – 7.21 (m, 3H), 6.99 (t, *J* = 7.2 Hz, 1H), 6.96 (d, *J* = 7.8 Hz, 1H), 4.30 (s, 2H), 3.92 (s, 3H).

**<sup>13</sup>C NMR (151 MHz, CDCl<sub>3</sub>) δ (ppm):** 200.1, 158.4, 135.2, 133.5, 130.6, 129.7, 128.3, 128.2, 126.5, 120.7, 111.5, 55.4, 50.1.

**HRMS (ESI-TOF) *m/z*:** [M + Na]<sup>+</sup> Calcd for C<sub>15</sub>H<sub>14</sub>O<sub>2</sub>Na<sup>+</sup> 249.0886; Found: 249.0886.

**1-(naphthalen-2-yl)-2-phenylethan-1-one 3aa**

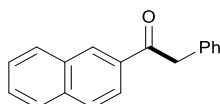

Prepared according to **General Procedure**. The crude product was purified by silica gel chromatography (petroleum ether/ethyl acetate 100:1 to 80:1) to afford (17.8 mg, 72% yield) as a white solid, m.p. = 91 – 95 °C.

*NMR and HRMS data for the product 3aa:*

**<sup>1</sup>H NMR (600 MHz, CDCl<sub>3</sub>) δ (ppm):** 8.56 (s, 1H), 8.07 (dd, *J* = 9.0, *J* = 2.4 Hz, 1H), 7.97 (d, *J* = 8.4 Hz, 1H), 7.89 (d, *J* = 7.8 Hz, 1H), 7.88 (d, *J* = 8.4 Hz, 1H), 7.61 (t, *J* = 7.2 Hz, 1H), 7.56 (t, *J* = 7.8 Hz, 1H), 7.36 – 7.33 (m, 4H), 7.28 – 7.25 (m, 1H), 4.43 (s, 2H).

**<sup>13</sup>C NMR (151 MHz, CDCl<sub>3</sub>) δ (ppm):** 197.6, 135.6, 134.7, 133.9, 132.5, 130.4, 129.6, 129.5, 128.7, 128.5, 128.5, 127.8, 126.9, 126.8, 124.2, 45.5.

**HRMS (ESI-TOF) *m/z*:** [M + Na]<sup>+</sup> Calcd for C<sub>18</sub>H<sub>14</sub>ONa<sup>+</sup> 269.0937; Found: 269.0933.

**1-(naphthalen-1-yl)-2-phenylethan-1-one 3ab**

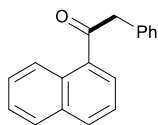

Prepared according to **General Procedure**. The crude product was purified by silica gel chromatography (petroleum ether/ethyl acetate 100:1 to 80:1) to afford (15.0 mg, 61% yield) as a white solid, m.p. = 52 – 56 °C.

*NMR and HRMS data for the product 3ab:*

**<sup>1</sup>H NMR (600 MHz, CDCl<sub>3</sub>) δ (ppm):** 8.58 (d, *J* = 8.4 Hz, 1H), 7.99 (d, *J* = 8.4 Hz, 1H), 7.96 (d, *J* = 8.4 Hz, 1H), 7.87 (d, *J* = 8.4 Hz, 1H), 7.57 (t, *J* = 8.4 Hz, 1H), 7.54 – 7.49 (m, 2H), 7.34 – 7.30 (m, 4H), 7.27 – 7.24 (m, 1H), 4.38 (s, 2H).

**<sup>13</sup>C NMR (151 MHz, CDCl<sub>3</sub>) δ (ppm):** 201.5, 135.6, 134.5, 134.0, 132.7, 130.4, 129.5, 128.7, 128.4, 128.0, 127.9, 126.9, 126.5, 125.8, 124.3, 48.9.

**HRMS (ESI-TOF) *m/z*:** [M + Na]<sup>+</sup> Calcd for C<sub>18</sub>H<sub>14</sub>ONa<sup>+</sup> 269.0937; Found: 269.0938.

**1-cyclohexyl-2-phenylethan-1-one 3ac**

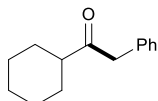

Prepared according to **General Procedure**. The crude product was purified by silica gel chromatography (petroleum ether/ethyl acetate 100:1 to 80:1) to afford (10.5 mg, 52% yield) as colorless.

*NMR and HRMS data for the product 3ac:*

**<sup>1</sup>H NMR (600 MHz, CDCl<sub>3</sub>) δ (ppm):** 7.34 (t, *J* = 7.2 Hz, 2H), 7.28 (d, *J* = 7.2 Hz, 1H), 7.21 (d, *J* = 7.2 Hz, 2H), 3.75 (s, 2H), 2.48 (tt, *J* = 10.8, *J* = 3.6 Hz, 1H), 1.85 – 1.78 (m, 4H), 1.69 – 1.66 (m, 1H), 1.42 – 1.35 (m, 2H), 1.31 – 1.20 (m, 3H).

**<sup>13</sup>C NMR (151 MHz, CDCl<sub>3</sub>) δ (ppm):** 211.3, 134.4, 129.4, 128.6, 126.8, 50.1, 47.8, 28.5, 25.8, 25.6.

**HRMS (ESI-TOF) *m/z*:** [M + Na]<sup>+</sup> Calcd for C<sub>14</sub>H<sub>18</sub>ONa<sup>+</sup> 225.1250; Found: 225.1257.

**1-(benzo[d][1,3]dioxol-5-yl)-2-phenylethan-1-one 3ad**

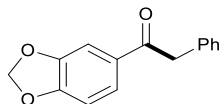

Prepared according to **General Procedure**. The crude product was purified by silica gel chromatography (petroleum ether/ethyl acetate 100:1 to 80:1) to afford (12.0 mg, 50% yield) as a white solid, m.p. = 81 – 85 °C.

*NMR and HRMS data for the product 3ad:*

**<sup>1</sup>H NMR (600 MHz, CDCl<sub>3</sub>) δ (ppm):** 7.63 (dd, *J* = 7.8, *J* = 1.8 Hz, 1H), 7.48 (s, 1H), 7.34 – 7.31 (m, 2H), 7.26 – 7.24 (m, 3H), 6.84 (d, *J* = 8.4 Hz, 1H), 6.03 (s, 2H), 4.21 (s, 2H).

**<sup>13</sup>C NMR (151 MHz, CDCl<sub>3</sub>) δ (ppm):** 195.7, 151.8, 148.2, 134.8, 131.4, 129.3, 128.7, 126.8, 125.0, 108.4, 107.9, 101.8, 45.3.

**HRMS (ESI-TOF) *m/z*:** [M + Na]<sup>+</sup> Calcd for C<sub>15</sub>H<sub>12</sub>O<sub>3</sub>Na<sup>+</sup> 263.0679; Found: 263.0680.

**1,3-diphenylbutan-2-one 3ae**

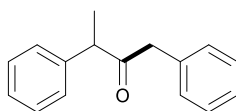

Prepared according to **General Procedure**. The crude product was purified by silica gel chromatography (petroleum ether/ethyl acetate 150:1 to 100:1) to afford (8.1 mg, 36% yield) as colorless oil.

*NMR and HRMS data for the product 3ae:*

**<sup>1</sup>H NMR (600 MHz, CDCl<sub>3</sub>) δ (ppm):** 7.34 (t, *J* = 7.2 Hz, 2H), 7.29 – 7.26 (m, 3H), 7.24 – 7.22 (m, 1H), 7.20 (d, *J* = 7.8 Hz, 2H), 7.05 (d, *J* = 7.2 Hz, 2H), 3.86 (q, *J* = 6.6 Hz, 1H), 3.62 (s, 2H), 1.37 (d, *J* = 6.6 Hz, 3H).

**<sup>13</sup>C NMR (151 MHz, CDCl<sub>3</sub>) δ (ppm):** 208.0, 140.4, 134.3, 129.4, 129.0, 128.5, 128.1, 127.2, 126.8, 52.1, 48.0, 17.6.

**HRMS (ESI-TOF) *m/z*:** [M + Na]<sup>+</sup> Calcd for C<sub>16</sub>H<sub>16</sub>ONa<sup>+</sup> 247.1093; Found: 247.1099.

**2-phenyl-1-(thiophen-2-yl)ethan-1-one 3af**

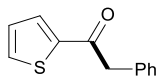

Prepared according to **General Procedure**. The crude product was purified by silica gel chromatography (petroleum ether/ethyl acetate 100:1 to 80:1) to afford (4.9 mg, 24% yield) as colorless oil.

*NMR and HRMS data for the product 3af:*

**<sup>1</sup>H NMR (600 MHz, CDCl<sub>3</sub>) δ (ppm):** 7.77 (d, *J* = 3.6 Hz, 1H), 7.64 (d, *J* = 4.8 Hz, 1H), 7.35 – 7.31 (m, 4H), 7.27 – 7.25 (m, 1H), 7.12 (t, *J* = 4.2 Hz, 1H), 4.20 (s, 2H).

**<sup>13</sup>C NMR (151 MHz, CDCl<sub>3</sub>) δ (ppm):** 190.4, 143.9, 134.3, 134.0, 132.6, 129.4, 128.7, 128.1, 127.0, 46.4.

**HRMS (ESI-TOF) *m/z*:** [M + H]<sup>+</sup> Calcd for C<sub>12</sub>H<sub>10</sub>OSH<sup>+</sup> 203.0526; Found: 203.0523.

**4-(2-phenylacetyl)-N,N-dipropylbenzenesulfonamide 3ag**

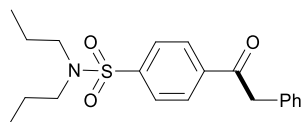

Prepared according to **General Procedure**. The crude product was purified by silica gel chromatography (petroleum ether/ethyl acetate 100:1 to 80:1) to afford (12.6 mg, 35% yield) as a white solid, m.p. = 58 – 61 °C.

*NMR and HRMS data for the product 3ag:*

**<sup>1</sup>H NMR (600 MHz, CDCl<sub>3</sub>) δ (ppm):** 8.10 (d, *J* = 8.4 Hz, 2H), 7.88 (d, *J* = 7.8 Hz, 2H), 7.34 (t, *J* = 7.8 Hz, 2H), 7.29 – 7.25 (m, 3H), 4.31 (s, 2H), 3.09 (t, *J* = 7.2 Hz, 4H), 1.58 – 1.51 (m, 4H), 0.86 (t, *J* = 7.2 Hz, 6H).

**<sup>13</sup>C NMR (151 MHz, CDCl<sub>3</sub>) δ (ppm):** 196.5, 144.2, 139.2, 133.7, 129.4, 129.1, 128.8, 127.3, 127.2, 50.0, 45.8, 22.0, 11.1.

**HRMS (ESI-TOF) *m/z*:** [M + Na]<sup>+</sup> Calcd for C<sub>20</sub>H<sub>25</sub>NO<sub>3</sub>SN<sup>+</sup> 382.1447; Found: 382.1448.

**3-(3-benzoylphenyl)-1-phenylbutan-2-one 3ah**

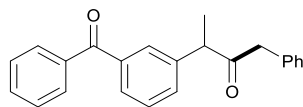

Prepared according to **General Procedure**. The crude product was purified by silica gel chromatography (petroleum ether/ethyl acetate 150:1 to 100:1) to afford (9.9 mg, 30% yield) as colorless oil.

*NMR and HRMS data for the product 3ah:*

**<sup>1</sup>H NMR (600 MHz, CDCl<sub>3</sub>) δ (ppm):** 7.77 (d, *J* = 6.6 Hz, 2H), 7.69 (d, *J* = 7.8 Hz, 1H), 7.63 (s, 1H), 7.61 (t, *J* = 7.8 Hz, 1H), 7.50 – 7.48 (m, 2H), 7.45 (t, *J* = 7.8 Hz, 1H), 7.41 (d, *J* = 7.8 Hz, 1H), 7.28 – 7.21 (m, 3H), 7.06 (d, *J* = 7.8 Hz, 2H), 3.95 (q, *J* = 7.2 Hz, 1H), 3.67 (s, 2H), 1.41 (d, *J* = 6.6 Hz, 3H).

**<sup>13</sup>C NMR (151 MHz, CDCl<sub>3</sub>) δ (ppm):** 207.5, 196.4, 140.6, 138.2, 137.4, 133.9, 132.6, 131.8, 130.0, 129.7, 129.4, 129.1, 128.9, 128.6, 128.3, 127.0, 51.8, 48.4, 17.8.

**HRMS (ESI-TOF) *m/z*:** [M + Na]<sup>+</sup> Calcd for C<sub>23</sub>H<sub>20</sub>O<sub>2</sub>Na<sup>+</sup> 351.1356; Found: 351.1362.

#### 4. General Procedure for the 5.

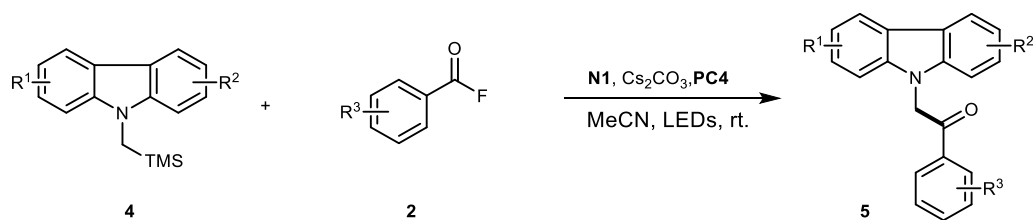

To a flame-dried Schlenk tube were added  $\alpha$ -silyl carbazole **4** (0.10 mmol, 1.0 equiv.), **N1** (0.20 mmol, 0.2 equiv.), photocatalyst **4** (2% mmol) and Cs<sub>2</sub>CO<sub>3</sub> (0.10 mmol, 1.0 equiv.), after which the tube was evacuated and back-filled with argon three times. Subsequently, under the protection of Ar, aryl fluoride **2** (0.20 mmol, 2.0 equiv.) and MeCN (1.0 mL) were added via syringe. Then, the resulting suspension was stirred at room temperature for 1.0 h, after which the reaction mixture was concentrated under reduced pressure and the resulting crude material was purified by column chromatography on silica gel (petroleum ether/ethyl acetate = 100/1, 50/1 to 20/1) to afford the corresponding products **5**, which were dried under vacuum and further analyzed by <sup>1</sup>H NMR, <sup>13</sup>C NMR, HRMS, *etc.*

#### 2-(9H-carbazol-9-yl)-1-phenylethan-1-one 5a

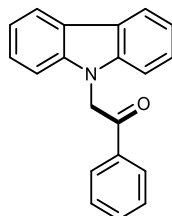

Prepared according to **General Procedure**. The crude product was purified by silica gel chromatography (petroleum ether/ethyl acetate 100:1, 50:1 to 20:1) to afford (23.1 mg, 81% yield) as a white solid, m.p. = 208 – 211 °C.

*NMR and HRMS data for the product 5a:*

**<sup>1</sup>H NMR (600 MHz, CDCl<sub>3</sub>)  $\delta$  (ppm):** 8.13 (d,  $J$  = 7.8 Hz, 2H), 8.08 (d,  $J$  = 7.8 Hz, 2H), 7.67 – 7.65 (m, 1H), 7.55 – 7.52 (m, 2H), 7.43 (d,  $J$  = 8.4 Hz, 2H), 7.27 – 7.24 (m, 4H), 5.67 (s, 2H).

**<sup>13</sup>C NMR (151 MHz, CDCl<sub>3</sub>)  $\delta$  (ppm):** 193.0, 140.8, 134.9, 134.0, 129.0, 128.0, 125.9, 123.3, 120.5, 119.5, 108.3, 49.3.

**HRMS (ESI-TOF)  $m/z$ :** [M + Na]<sup>+</sup> Calcd for C<sub>20</sub>H<sub>15</sub>NONa<sup>+</sup> 308.1046; Found: 308.1048.



**2-(9H-carbazol-9-yl)-1-(4-ethylphenyl)ethan-1-one 5b**

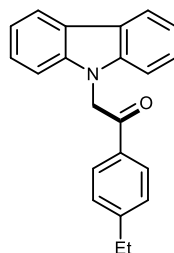

Prepared according to **General Procedure**. The crude product was purified by silica gel chromatography (petroleum ether/ethyl acetate 100:1, 50:1 to 20:1) to afford (20.4 mg, 65% yield) as a white solid, m.p. = 167 – 172 °C.

*NMR and HRMS data for the product 5b:*

**<sup>1</sup>H NMR (600 MHz, CDCl<sub>3</sub>) δ (ppm):** 8.10 (d, *J* = 7.2 Hz, 2H), 7.95 (d, *J* = 7.8 Hz, 2H), 7.40 (t, *J* = 7.8 Hz, 2H), 7.31 (d, *J* = 7.8 Hz, 2H), 7.25 – 7.19 (m, 4H), 5.55 (s, 2H), 2.72 (q, *J* = 7.8 Hz, 2H), 1.26 (t, *J* = 7.8 Hz, 3H).

**<sup>13</sup>C NMR (151 MHz, CDCl<sub>3</sub>) δ (ppm):** 192.6, 151.1, 140.8, 132.6, 128.5, 128.2, 125.8, 123.3, 120.5, 119.4, 108.3, 49.2, 29.0, 15.1.

**HRMS (ESI-TOF) *m/z*:** [M + Na]<sup>+</sup> Calcd for C<sub>22</sub>H<sub>19</sub>NONa<sup>+</sup> 336.1359; Found: 336.1361.

**2-(9H-carbazol-9-yl)-1-(4-methoxyphenyl)ethan-1-one 5c**

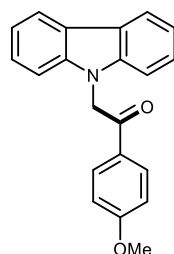

Prepared according to **General Procedure**. The crude product was purified by silica gel chromatography (petroleum ether/ethyl acetate 100:1, 50:1 to 20:1) to afford (28.4 mg, 90% yield) as a white solid, m.p. = 201 – 206 °C.

*NMR and HRMS data for the product 5c:*

**<sup>1</sup>H NMR (600 MHz, CDCl<sub>3</sub>) δ (ppm):** 8.12 (d, *J* = 7.8 Hz, 2H), 8.05 (d, *J* = 9.0 Hz, 2H), 7.42 (t, *J* = 7.2 Hz, 2H), 7.26 – 7.23 (m, 4H), 6.98 (d, *J* = 9.0 Hz, 2H), 5.61 (s, 2H), 3.89 (s, 3H).

**<sup>13</sup>C NMR (151 MHz, CDCl<sub>3</sub>) δ (ppm):** 191.5, 164.2, 140.9, 130.4, 127.9, 125.9, 123.3, 120.5, 119.4, 114.2, 108.4, 55.6, 49.1.

**HRMS (ESI-TOF) *m/z*:** [M + Na]<sup>+</sup> Calcd for C<sub>21</sub>H<sub>17</sub>NO<sub>2</sub>Na<sup>+</sup> 338.1151; Found: 338.1141.

**2-(9H-carbazol-9-yl)-1-(4-chlorophenyl)ethan-1-one 5d**

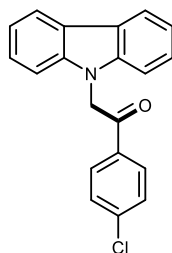

Prepared according to **General Procedure**. The crude product was purified by silica gel chromatography (petroleum ether/ethyl acetate 100:1, 50:1 to 20:1) to afford (21.8 mg, 68% yield) as a white solid, m.p. = 167 – 169 °C.

*NMR and HRMS data for the product 5d:*

**<sup>1</sup>H NMR (600 MHz, CDCl<sub>3</sub>) δ (ppm):** 8.11 (d, *J* = 7.8 Hz, 2H), 7.95 (d, *J* = 9.0 Hz, 2H), 7.46 – 7.44 (m, 2H), 7.41 (t, *J* = 8.4 Hz, 2H), 7.25 – 7.23 (m, 2H), 7.20 (d, *J* = 7.8 Hz, 2H), 5.55 (s, 2H).

**<sup>13</sup>C NMR (151 MHz, CDCl<sub>3</sub>) δ (ppm):** 192.1, 140.7, 140.6, 133.1, 129.4, 129.3, 126.0, 123.3, 120.6, 119.6, 108.2, 49.3.

**HRMS (ESI-TOF) *m/z*:** [M + Na]<sup>+</sup> Calcd for C<sub>20</sub>H<sub>14</sub>ClNONa<sup>+</sup> 342.0656 (<sup>35</sup>Cl), 344.0627 (<sup>37</sup>Cl); Found: 342.0652, 344.0638.

**1-([1,1'-biphenyl]-4-yl)-2-(9H-carbazol-9-yl)ethan-1-one 5e**

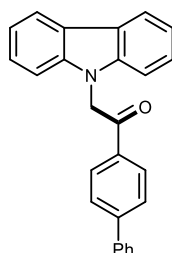

Prepared according to **General Procedure**. The crude product was purified by silica gel chromatography (petroleum ether/ethyl acetate 100:1, 50:1 to 20:1) to afford (31.1 mg, 86% yield) as a white solid, m.p. = 178 – 181 °C.

*NMR and HRMS data for the product 5e:*

**<sup>1</sup>H NMR (600 MHz, CDCl<sub>3</sub>) δ (ppm):** 8.13 (d, *J* = 7.8 Hz, 4H), 7.73 (d, *J* = 9.0 Hz, 2H), 7.64 (d, *J* = 8.4 Hz, 2H), 7.49 (t, *J* = 7.2 Hz, 2H), 7.45 – 7.42 (m, 3H), 7.27 – 7.25 (m, 4H), 5.67 (s, 2H).

**<sup>13</sup>C NMR (151 MHz, CDCl<sub>3</sub>) δ (ppm):** 192.6, 146.7, 140.8, 139.6, 133.5, 129.0, 128.7, 128.5,

127.6, 127.3, 125.9, 123.3, 120.5, 119.5, 108.3, 49.4.

**HRMS (ESI-TOF)  $m/z$ :**  $[M + Na]^+$  Calcd for  $C_{26}H_{19}NONa^+$  384.1359; Found: 384.1366.

**2-(9H-carbazol-9-yl)-1-(*m*-tolyl)ethan-1-one 5f**

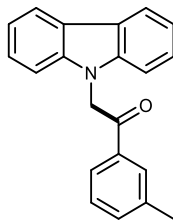

Prepared according to **General Procedure**. The crude product was purified by silica gel chromatography (petroleum ether/ethyl acetate 100:1, 50:1 to 20:1) to afford (18.9 mg, 63% yield) as a white solid, m.p. = 133 – 137 °C.

*NMR and HRMS data for the product 5f:*

**$^1H$  NMR (600 MHz,  $CDCl_3$ )  $\delta$  (ppm):** 8.14 (d,  $J$  = 7.8 Hz, 2H), 7.88 (s, 1H), 7.86 (d,  $J$  = 8.4 Hz, 1H), 7.47 (d,  $J$  = 7.8 Hz, 1H), 7.44 – 7.41 (m, 3H), 7.27 (t,  $J$  = 7.8 Hz, 2H), 7.23 (d,  $J$  = 7.8 Hz, 2H), 5.60 (s, 2H), 2.45 (s, 3H).

**$^{13}C$  NMR (151 MHz,  $CDCl_3$ )  $\delta$  (ppm):** 193.1, 140.8, 138.9, 134.8, 134.8, 128.8, 128.5, 125.8, 125.2, 123.3, 120.5, 119.4, 108.3, 49.3, 21.3.

**HRMS (ESI-TOF)  $m/z$ :**  $[M + Na]^+$  Calcd for  $C_{21}H_{17}NONa^+$  322.1202; Found: 322.1204.

**2-(9H-carbazol-9-yl)-1-(3-methoxyphenyl)ethan-1-one 5g**

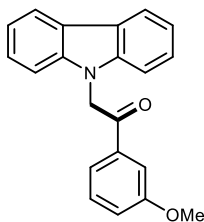

Prepared according to **General Procedure**. The crude product was purified by silica gel chromatography (petroleum ether/ethyl acetate 100:1, 50:1 to 20:1) to afford (15.8 mg, 50% yield) as a white solid, m.p. = 146 – 148 °C.

*NMR and HRMS data for the product 5g:*

**$^1H$  NMR (600 MHz,  $CDCl_3$ )  $\delta$  (ppm):** 8.13 (d,  $J$  = 6.6 Hz, 2H), 7.69 (d,  $J$  = 7.8 Hz, 1H), 7.54 (s, 1H), 7.45 – 7.42 (m, 3H), 7.27 – 7.25 (m, 4H), 7.19 (dd,  $J$  = 7.8,  $J$  = 2.4 Hz, 1H), 5.66 (s, 2H), 3.81 (s, 3H).

**$^{13}C$  NMR (151 MHz,  $CDCl_3$ )  $\delta$  (ppm):** 193.0, 160.0, 140.8, 136.1, 130.0, 125.9, 123.3, 120.7,

120.5, 120.5, 119.5, 112.2, 108.3, 55.5, 49.5.

**HRMS (ESI-TOF)  $m/z$ :**  $[M + Na]^+$  Calcd for  $C_{21}H_{17}NO_2Na^+$  338.1151; Found: 338.1150.

**2-(9H-carbazol-9-yl)-1-(3-chlorophenyl)ethan-1-one 5h**

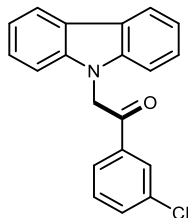

Prepared according to **General Procedure**. The crude product was purified by silica gel chromatography (petroleum ether/ethyl acetate 100:1, 50:1 to 20:1) to afford (17.6 mg, 55% yield) as a white solid, m.p. = 163 – 167 °C.

*NMR and HRMS data for the product 5h:*

**$^1H$  NMR (600 MHz,  $CDCl_3$ )  $\delta$  (ppm):** 8.13 (d,  $J$  = 7.2 Hz, 2H), 8.03 (s, 1H), 7.91 (d,  $J$  = 7.2 Hz, 1H), 7.62 (d,  $J$  = 6.6 Hz, 1H), 7.46 – 7.42 (m, 3H), 7.27 (t,  $J$  = 7.8 Hz, 2H), 7.21 (d,  $J$  = 8.4 Hz, 2H), 5.57 (s, 2H).

**$^{13}C$  NMR (151 MHz,  $CDCl_3$ )  $\delta$  (ppm):** 192.0, 140.6, 136.2, 135.4, 133.9, 130.3, 128.2, 126.0, 126.0, 123.3, 120.6, 119.7, 108.2, 49.4.

**HRMS (ESI-TOF)  $m/z$ :**  $[M + Na]^+$  Calcd for  $C_{20}H_{14}ClN_2O_2Na^+$  342.0656 ( $^{35}Cl$ ), 344.0627 ( $^{37}Cl$ ); Found: 342.0652, 344.0637.

**2-(9H-carbazol-9-yl)-1-(o-tolyl)ethan-1-one 5i**

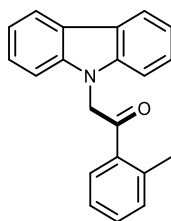

Prepared according to **General Procedure**. The crude product was purified by silica gel chromatography (petroleum ether/ethyl acetate 100:1, 50:1 to 20:1) to afford (16.2 mg, 54% yield) as a white solid, m.p. = 144 – 147 °C.

*NMR and HRMS data for the product 5i:*

**$^1H$  NMR (600 MHz,  $CDCl_3$ )  $\delta$  (ppm):** 8.11 (d,  $J$  = 7.8 Hz, 2H), 7.87 (d,  $J$  = 7.2 Hz, 1H), 7.45 – 7.42 (m, 3H), 7.32 (d,  $J$  = 7.8 Hz, 1H), 7.29 (d,  $J$  = 7.8 Hz, 1H), 7.26 – 7.24 (m, 4H), 5.55 (s, 2H), 2.49 (s, 3H).

**<sup>13</sup>C NMR (151 MHz, CDCl<sub>3</sub>) δ (ppm):** 196.5, 140.8, 139.5, 134.9, 132.5, 132.3, 128.2, 125.9, 125.9, 123.3, 120.5, 119.5, 108.2, 51.0, 21.4.

**HRMS (ESI-TOF) *m/z*:** [M + Na]<sup>+</sup> Calcd for C<sub>21</sub>H<sub>17</sub>NONa<sup>+</sup> 322.1202; Found: 322.1201.

**1-(benzo[d][1,3]dioxol-5-yl)-2-(9H-carbazol-9-yl)ethan-1-one 5j**

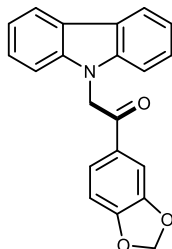

Prepared according to **General Procedure**. The crude product was purified by silica gel chromatography (petroleum ether/ethyl acetate 100:1, 50:1 to 20:1) to afford (21.4 mg, 65% yield) as a white solid, m.p. = 168 – 173 °C.

*NMR and HRMS data for the product 5j:*

**<sup>1</sup>H NMR (600 MHz, CDCl<sub>3</sub>) δ (ppm):** 8.12 (d, *J* = 7.8 Hz, 2H), 7.69 (dd, *J* = 8.4, *J* = 1.8 Hz, 1H), 7.50 (s, 1H), 7.43 (t, *J* = 8.4 Hz, 2H), 7.26 (d, *J* = 7.8 Hz, 2H), 7.23 (d, *J* = 7.8 Hz, 2H), 6.90 (d, *J* = 8.4 Hz, 1H), 6.07 (s, 2H), 5.56 (s, 2H).

**<sup>13</sup>C NMR (151 MHz, CDCl<sub>3</sub>) δ (ppm):** 191.0, 152.5, 148.5, 140.8, 129.6, 125.9, 124.3, 123.3, 120.5, 119.5, 108.3, 108.2, 107.9, 102.0, 49.1.

**HRMS (ESI-TOF) *m/z*:** [M + Na]<sup>+</sup> Calcd for C<sub>21</sub>H<sub>15</sub>NO<sub>3</sub>Na<sup>+</sup> 352.0944; Found: 352.0949.

**2-(9H-carbazol-9-yl)-1-(thiophen-2-yl)ethan-1-one 5k**

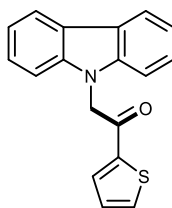

Prepared according to **General Procedure**. The crude product was purified by silica gel chromatography (petroleum ether/ethyl acetate 100:1, 50:1 to 20:1) to afford (8.0 mg, 27% yield) as a white solid, m.p. = 169 – 173 °C.

*NMR and HRMS data for the product 5k:*

**<sup>1</sup>H NMR (600 MHz, CDCl<sub>3</sub>) δ (ppm):** 8.12 (d, *J* = 8.4 Hz, 2H), 7.74 (d, *J* = 4.2 Hz, 1H), 7.66 (d, *J* = 4.2 Hz, 1H), 7.45 – 7.42 (m, 2H), 7.31 (d, *J* = 7.8 Hz, 2H), 7.26 (t, *J* = 7.2 Hz, 2H), 7.10

(t,  $J = 4.8$  Hz, 1H), 5.49 (s, 2H).

**$^{13}\text{C}$  NMR (151 MHz,  $\text{CDCl}_3$ )  $\delta$  (ppm):** 186.9, 141.0, 140.7, 134.7, 132.4, 128.4, 126.1, 123.3, 120.5, 119.7, 108.5, 50.1.

**HRMS (ESI-TOF)  $m/z$ :**  $[\text{M} + \text{Na}]^+$  Calcd for  $\text{C}_{21}\text{H}_{15}\text{NO}_3\text{Na}^+$  352.0944; Found: 352.0949.

**2-(9H-carbazol-9-yl)-1-cycloheptylethan-1-one 5l**

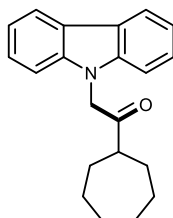

Prepared according to **General Procedure**. The crude product was purified by silica gel chromatography (petroleum ether/ethyl acetate 100:1, 50:1 to 20:1) to afford (16.5 mg, 54% yield) as a white solid, m.p. = 124 – 127 °C.

*NMR and HRMS data for the product 5l:*

**$^1\text{H}$  NMR (600 MHz,  $\text{CDCl}_3$ )  $\delta$  (ppm):** 8.12 (d,  $J = 7.8$  Hz, 2H), 7.46 (t,  $J = 7.2$  Hz, 2H), 7.27 (t,  $J = 7.8$  Hz, 2H), 7.23 (d,  $J = 8.4$  Hz, 2H), 5.03 (s, 2H), 2.61 – 2.56 (m, 1H), 1.85 – 1.80 (m, 2H), 1.70 – 1.62 (m, 4H), 1.48 – 1.46 (m, 4H), 1.35 – 1.29 (m, 2H).

**$^{13}\text{C}$  NMR (151 MHz,  $\text{CDCl}_3$ )  $\delta$  (ppm):** 209.2, 140.6, 126.0, 123.2, 120.5, 119.6, 108.2, 50.9, 48.5, 29.9, 28.2, 26.4.

**HRMS (ESI-TOF)  $m/z$ :**  $[\text{M} + \text{Na}]^+$  Calcd for  $\text{C}_{21}\text{H}_{23}\text{NONa}^+$  328.1672; Found: 328.1676.

**2-(3-methyl-9H-carbazol-9-yl)-1-phenylethan-1-one 5m**

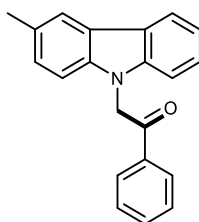

Prepared according to **General Procedure**. The crude product was purified by silica gel chromatography (petroleum ether/ethyl acetate 50:1, 20:1 to 5:1) to afford (26.9 mg, 90% yield) as a white solid, m.p. = 216 – 219 °C.

*NMR and HRMS data for the product 5m:*

**$^1\text{H}$  NMR (600 MHz,  $\text{DMSO}-d_6$ )  $\delta$  (ppm):** 8.14 (d,  $J = 8.4$  Hz, 2H), 8.10 (d,  $J = 7.8$  Hz, 1H), 7.94 (s, 1H), 7.72 (t,  $J = 6.6$  Hz, 1H), 7.60 (t,  $J = 7.2$  Hz, 2H), 7.45 (d,  $J = 8.4$  Hz, 1H), 7.38 –

7.34 (m, 2H), 7.22 – 7.16 (m, 2H), 6.03 (s, 2H), 2.48 (s, 3H).

**<sup>13</sup>C NMR (151 MHz, DMSO-*d*<sub>6</sub>) δ (ppm):** 194.1, 140.9, 139.0, 134.9, 133.5, 128.6, 127.9, 127.5, 126.6, 125.2, 122.3, 122.0, 119.7, 119.7, 118.5, 109.0, 108.8, 49.1, 20.7.

**HRMS (ESI-TOF) *m/z*:** [M + Na]<sup>+</sup> Calcd for C<sub>20</sub>H<sub>15</sub>NONa<sup>+</sup> 322.1203; Found: 322.1200.

**2-(3-methoxy-9H-carbazol-9-yl)-1-phenylethan-1-one 5n**

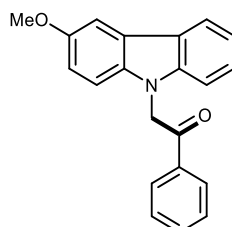

Prepared according to **General Procedure**. The crude product was purified by silica gel chromatography (petroleum ether/ethyl acetate 50:1, 20:1 to 5:1) to afford (17.7 mg, 56% yield) as a white solid, m.p. = 192 – 194 °C.

*NMR and HRMS data for the product 5m:*

**<sup>1</sup>H NMR (600 MHz, CDCl<sub>3</sub>) δ (ppm):** 8.08 – 8.05 (m, 3H), 7.64 (t, *J* = 7.8 Hz, 1H), 7.61 (d, *J* = 2.4 Hz, 1H), 7.52 (t, *J* = 7.8 Hz, 2H), 7.41 (t, *J* = 7.2 Hz, 1H), 7.24 – 7.21 (m, 2H), 7.16 (d, *J* = 9.0 Hz, 1H), 7.07 (dd, *J* = 9.0, *J* = 2.4 Hz, 1H), 5.62 (s, 2H), 3.93 (s, 3H).

**<sup>13</sup>C NMR (151 MHz, CDCl<sub>3</sub>) δ (ppm):** 193.2, 154.2, 141.5, 135.9, 135.1, 133.9, 129.0, 128.0, 125.9, 123.8, 123.3, 120.5, 119.1, 115.0, 109.0, 108.4, 103.9, 56.2, 49.6.

**HRMS (ESI-TOF) *m/z*:** [M + Na]<sup>+</sup> Calcd for C<sub>21</sub>H<sub>17</sub>NO<sub>2</sub>Na<sup>+</sup> 338.1152; Found: 338.1151.

**1-phenyl-2-(3-phenyl-9H-carbazol-9-yl)ethan-1-one 5o**

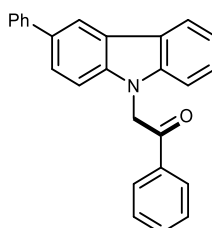

Prepared according to **General Procedure**. The crude product was purified by silica gel chromatography (petroleum ether/ethyl acetate 50:1 to 20:1) to afford (25.7 mg, 71% yield) as a white solid, m.p. = 112 – 115 °C.

*NMR and HRMS data for the product 5o:*

**<sup>1</sup>H NMR (600 MHz, CDCl<sub>3</sub>) δ (ppm):** 8.32 (s, 1H), 8.16 (d, *J* = 7.2 Hz, 1H), 8.06 (d, *J* = 8.4 Hz, 2H), 7.70 (d, *J* = 7.2 Hz, 2H), 7.66 – 7.63 (m, 2H), 7.52 (t, *J* = 8.4 Hz, 2H), 7.47 (t, *J* = 7.2

Hz, 2H), 7.42 (t,  $J = 7.2$  Hz, 1H), 7.34 (t,  $J = 7.2$  Hz, 1H), 7.28 – 7.22 (m, 3H), 5.63 (s, 2H).  
 **$^{13}\text{C}$  NMR (151 MHz,  $\text{CDCl}_3$ )  $\delta$  (ppm):** 192.8, 142.0, 141.2, 140.3, 134.7, 134.1, 133.0, 129.0, 128.7, 128.0, 127.3, 126.4, 126.1, 125.5, 123.7, 123.4, 120.6, 119.6, 119.1, 108.5, 108.4, 49.3.  
**HRMS (ESI-TOF)  $m/z$ :**  $[\text{M} + \text{Na}]^+$  Calcd for  $\text{C}_{26}\text{H}_{19}\text{NONa}^+$  384.1359; Found: 384.1358.

**2-(3-bromo-9H-carbazol-9-yl)-1-phenylethan-1-one 5p**

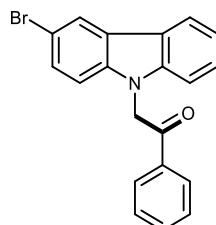

Prepared according to **General Procedure**. The crude product was purified by silica gel chromatography (petroleum ether/ethyl acetate 100:1, 50:1 to 20:1) to afford (31.0 mg, 85% yield) as a white solid, m.p. = 197 – 202 °C.

*NMR and HRMS data for the product 5p:*

**$^1\text{H}$  NMR (600 MHz,  $\text{DMSO}-d_6$ )  $\delta$  (ppm):** 8.44 (s, 1H), 8.24 (d,  $J = 7.8$  Hz, 1H), 8.16 (d,  $J = 7.2$  Hz, 2H), 7.75 (t,  $J = 7.8$  Hz, 1H), 7.64 (t,  $J = 7.8$  Hz, 2H), 7.56 – 7.52 (m, 3H), 7.43 (t,  $J = 8.4$  Hz, 1H), 7.24 (t,  $J = 7.2$  Hz, 1H), 6.18 (s, 2H).

**$^{13}\text{C}$  NMR (151 MHz,  $\text{DMSO}-d_6$ )  $\delta$  (ppm):** 194.1, 141.2, 139.7, 134.8, 134.0, 128.9, 128.4, 128.0, 126.5, 124.3, 122.8, 121.4, 120.8, 119.5, 111.6, 111.2, 109.8, 49.5.

**HRMS (ESI-TOF)  $m/z$ :**  $[\text{M} + \text{Na}]^+$  Calcd for  $\text{C}_{20}\text{H}_{14}\text{BrNONa}^+$  386.0151 ( $^{79}\text{Br}$ ), 388.0131 ( $^{81}\text{Br}$ ); Found: 386.0159, 388.0139.

**2-(3,6-dimethyl-9H-carbazol-9-yl)-1-phenylethan-1-one 5q**

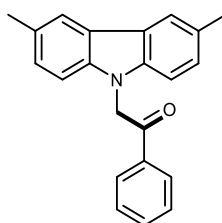

Prepared according to **General Procedure**. The crude product was purified by silica gel chromatography (petroleum ether/ethyl acetate 50:1, 20:1 to 5:1) to afford (17.6 mg, 56% yield) as a white solid, m.p. = 220 – 225 °C.

*NMR and HRMS data for the product 5q:*

**$^1\text{H}$  NMR (600 MHz,  $\text{DMSO}-d_6$ )  $\delta$  (ppm):** 8.15 (d,  $J = 7.8$  Hz, 2H), 7.91 (s, 2H), 7.73 (t,  $J =$



7.2 Hz, 1H), 7.62 (t,  $J = 7.2$  Hz, 2H), 7.36 (d,  $J = 8.4$  Hz, 2H), 7.19 (d,  $J = 7.8$  Hz, 2H), 6.04 (s, 2H), 2.47 (s, 6H).

$^{13}\text{C}$  NMR (151 MHz, DMSO- $d_6$ )  $\delta$  (ppm): 194.2, 139.2, 134.9, 133.5, 128.6, 127.9, 127.2, 126.5, 122.2, 119.6, 108.8, 49.2, 20.7.

HRMS (ESI-TOF)  $m/z$ :  $[\text{M} + \text{Na}]^+$  Calcd for  $\text{C}_{22}\text{H}_{19}\text{NOH}^+$  314.1540; Found: 314.1533.

**2-(3-methyl-6-phenyl-9H-carbazol-9-yl)-1-phenylethan-1-one 5r**

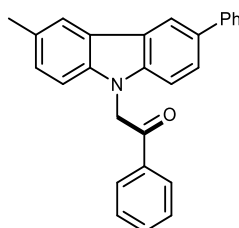

Prepared according to **General Procedure**. The crude product was purified by silica gel chromatography (petroleum ether/ethyl acetate 50:1, 20:1 to 5:1) to afford (33.8 mg, 90% yield) as a white solid, m.p. = 198 – 202 °C.

NMR and HRMS data for the product **5r**:

$^1\text{H}$  NMR (600 MHz, DMSO- $d_6$ )  $\delta$  (ppm): 8.41 (s, 1H), 8.15 (d,  $J = 7.8$  Hz, 2H), 8.05 (s, 1H), 7.77 (d,  $J = 8.4$  Hz, 2H), 7.72 (t,  $J = 7.2$  Hz, 1H), 7.69 (d,  $J = 8.4$  Hz, 1H), 7.61 (t,  $J = 7.8$  Hz, 2H), 7.53 (d,  $J = 8.4$  Hz, 1H), 7.48 (t,  $J = 8.4$  Hz, 2H), 7.39 (d,  $J = 8.4$  Hz, 1H), 7.33 (t,  $J = 7.8$  Hz, 1H), 7.25 (d,  $J = 8.4$  Hz, 1H), 6.02 (s, 2H), 2.51 (s, 3H).

$^{13}\text{C}$  NMR (151 MHz, DMSO- $d_6$ )  $\delta$  (ppm): 194.2, 141.1, 140.6, 139.6, 134.9, 133.7, 131.2, 128.7, 128.1, 127.8, 127.0, 126.5, 126.2, 124.4, 122.8, 122.6, 120.1, 118.0, 109.6, 109.1, 49.3, 20.9.

HRMS (ESI-TOF)  $m/z$ :  $[\text{M} + \text{Na}]^+$  Calcd for  $\text{C}_{27}\text{H}_{21}\text{NONa}^+$  398.1516; Found: 398.1510.

**2-(3,6-dibromo-9H-carbazol-9-yl)-1-phenylethan-1-one 5s**

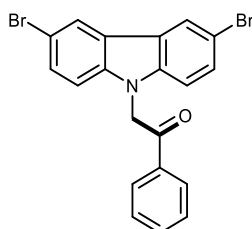

Prepared according to **General Procedure**. The crude product was purified by silica gel chromatography (petroleum ether/ethyl acetate 50:1, 20:1 to 5:1) to afford (39.0 mg, 88% yield) as a white solid, m.p. = 162 – 167 °C.

*NMR and HRMS data for the product 5s:*

**<sup>1</sup>H NMR (600 MHz, DMSO-*d*<sub>6</sub>) δ (ppm):** 8.51 (s, 2H), 8.14 (d, *J* = 7.2 Hz, 2H), 7.75 (t, *J* = 7.8 Hz, 1H), 7.63 (t, *J* = 8.4 Hz, 2H), 7.56 (s, 4H), 6.19 (s, 2H).

**<sup>13</sup>C NMR (151 MHz, DMSO-*d*<sub>6</sub>) δ (ppm):** 193.8, 140.1, 134.7, 134.1, 128.9, 128.8, 128.4, 123.4, 123.3, 112.0, 111.6, 49.7.

**HRMS (ESI-TOF) *m/z*:** [M + Na]<sup>+</sup> Calcd for C<sub>20</sub>H<sub>13</sub>Br<sub>2</sub>NONa<sup>+</sup> 463.9257 (<sup>79</sup>Br), 467.9216 (<sup>81</sup>Br); Found: 463.9257, 467.9220.

**2-(2-bromo-9H-carbazol-9-yl)-1-phenylethan-1-one 5t**

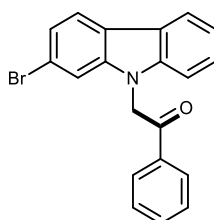

Prepared according to **General Procedure**. The crude product was purified by silica gel chromatography (petroleum ether/ethyl acetate 100:1, 50:1 to 20:1) to afford (25.1 mg, 69% yield) as a white solid, m.p. = 170 – 173 °C.

*NMR and HRMS data for the product 5t:*

**<sup>1</sup>H NMR (600 MHz, CDCl<sub>3</sub>) δ (ppm):** 8.06 (t, *J* = 7.8 Hz, 3H), 7.93 (d, *J* = 9.0 Hz, 1H), 7.67 (t, *J* = 7.2 Hz, 1H), 7.54 (t, *J* = 7.8 Hz, 2H), 7.42 (t, *J* = 7.8 Hz, 1H), 7.35 – 7.33 (m, 2H), 7.27 – 7.24 (m, 1H), 7.18 (d, *J* = 8.4 Hz, 1H), 5.56 (s, 2H).

**<sup>13</sup>C NMR (151 MHz, CDCl<sub>3</sub>) δ (ppm):** 192.2, 141.6, 140.9, 134.5, 134.2, 129.1, 128.0, 126.3, 122.7, 122.7, 122.2, 121.6, 120.5, 120.0, 119.4, 111.5, 108.4, 49.1.

**HRMS (ESI-TOF) *m/z*:** [M + Na]<sup>+</sup> Calcd for C<sub>20</sub>H<sub>14</sub>BrNONa<sup>+</sup> 386.0151 (<sup>79</sup>Br), 388.0131 (<sup>81</sup>Br); Found: 386.0147, 388.0125.

**2-(2,4-dimethyl-9H-carbazol-9-yl)-1-phenylethan-1-one 5u**

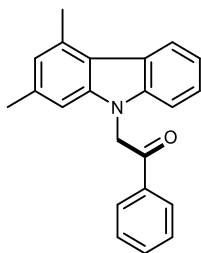

Prepared according to **General Procedure**. The crude product was purified by silica gel chromatography (petroleum ether/ethyl acetate 50:1, 20:1 to 5:1) to afford (24.1 mg, 77% yield) as a white solid, m.p. = 231 – 234 °C.

*NMR and HRMS data for the product 5u:*

**<sup>1</sup>H NMR (600 MHz, DMSO-*d*<sub>6</sub>) δ (ppm):** 8.17 (d, *J* = 6.6 Hz, 2H), 8.11 (d, *J* = 7.2 Hz, 1H), 7.75 (t, *J* = 7.2 Hz, 1H), 7.63 (t, *J* = 7.8 Hz, 2H), 7.48 (d, *J* = 7.8 Hz, 1H), 7.35 (t, *J* = 7.2 Hz, 1H), 7.20 (t, *J* = 7.8 Hz, 1H), 7.17 (s, 1H), 6.84 (s, 1H), 6.08 (s, 2H), 2.79 (s, 3H), 2.41 (s, 3H).

**<sup>13</sup>C NMR (151 MHz, DMSO-*d*<sub>6</sub>) δ (ppm):** 194.0, 141.2, 140.6, 134.9, 134.7, 133.5, 131.9, 128.6, 127.9, 124.2, 122.8, 121.9, 121.4, 118.7, 118.5, 108.7, 106.7, 49.0, 21.3, 19.9.

**HRMS (ESI-TOF) *m/z*:** [M + Na]<sup>+</sup> Calcd for C<sub>22</sub>H<sub>19</sub>NONa<sup>+</sup> 336.1359; Found: 336.1361.

**1-phenyl-2-(2,4,6-trimethyl-9H-carbazol-9-yl)ethan-1-one 5v**

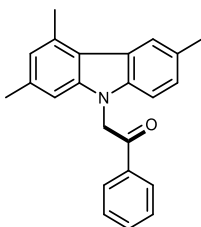

Prepared according to **General Procedure**. The crude product was purified by silica gel chromatography (petroleum ether/ethyl acetate 50:1, 20:1 to 5:1) to afford (28.5 mg, 87% yield) as a white solid, m.p. = 197 – 199 °C.

*NMR and HRMS data for the product 5v:*

**<sup>1</sup>H NMR (600 MHz, DMSO-*d*<sub>6</sub>) δ (ppm):** 8.16 (d, *J* = 8.4 Hz, 2H), 7.91 (s, 1H), 7.73 (t, *J* = 7.8 Hz, 1H), 7.62 (t, *J* = 8.4 Hz, 2H), 7.35 (d, *J* = 8.4 Hz, 1H), 7.18 (d, *J* = 8.4 Hz, 1H), 7.11 (s, 1H), 6.81 (s, 1H), 6.01 (s, 2H), 2.79 (s, 3H), 2.49 (s, 3H), 2.40 (s, 3H),.

**<sup>13</sup>C NMR (151 MHz, DMSO-*d*<sub>6</sub>) δ (ppm):** 194.1, 141.4, 139.0, 134.9, 134.5, 133.5, 131.8, 128.6, 127.9, 127.3, 125.4, 123.0, 121.7, 121.4, 118.3, 108.4, 106.6, 49.1, 21.3, 20.9, 20.0.

**HRMS (ESI-TOF) *m/z*:** [M + Na]<sup>+</sup> Calcd for C<sub>23</sub>H<sub>21</sub>NONa<sup>+</sup> 350.1516; Found: 350.1524.

## 5. Mechanistic Studies.

### 5.1 Control experiments

Severe control experiments revealed that all of the reaction parameters were crucial for this transformation.

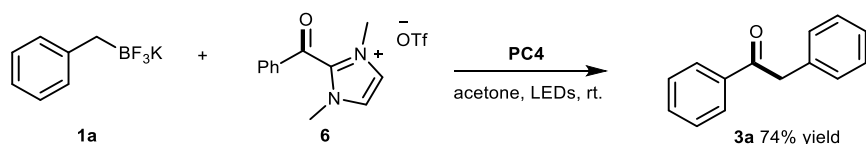

According to the **General Procedure**, to a flame-dried Schlenk tube were added alkyl trifluoroborates **1a** (0.10 mmol, 1.0 equiv.), photocatalyst **4** (2% mmol), and 2-benzoyl-1,3-dimethyl-1H-imidazol-3-ium trifluoromethanesulfonate **6** (0.20 mmol, 2.0 equiv.). Then, the reaction tube was evacuated and back-filled with argon three times. Subsequently, acetone (2.0 mL) was added via syringe. The resulting mixture was stirred at ambient temperature for about 3 h (monitored by TLC). After the reaction mixture was concentrated, the resulting crude material was purified by column chromatography on silica gel (petroleum ether/ethyl acetate = 100/1 to 80/1) to afford **3a** (14.5 mg, 74%).

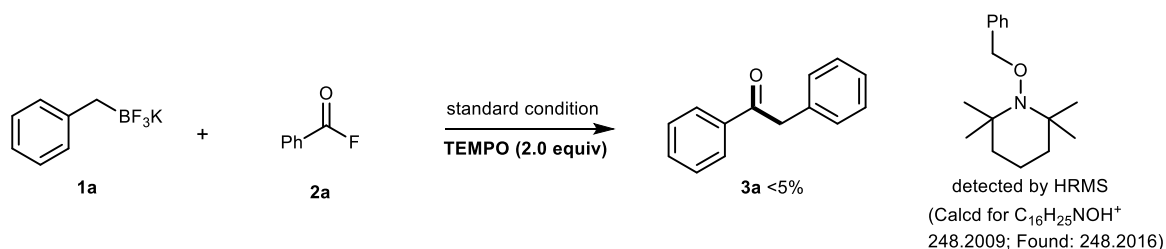

To a flame-dried Schlenk tube were added trifluoroborate **1a** (0.10 mmol, 1.0 equiv.), NHC **N1** (0.20 mmol, 0.2 equiv.), photocatalyst **4** (2% mmol), Cs<sub>2</sub>CO<sub>3</sub> (0.10 mmol, 1.0 equiv.), and 2,2,6,6-tetramethyl piperidine-N-oxyl (TEMPO, 0.20 mmol, 2.0 equiv.). Then, the tube was evacuated and back-filled with argon three times. Subsequently, under the protection of Ar, aroyl fluoride **2** (0.20 mmol, 2.0 equiv.) and acetone (2.0 mL) were added via syringe. The resulting mixture was stirred at ambient temperature for about 3 h. The reaction was found to be suppressed upon addition of TEMPO, and less than 5% yield of **3a** was obtained.

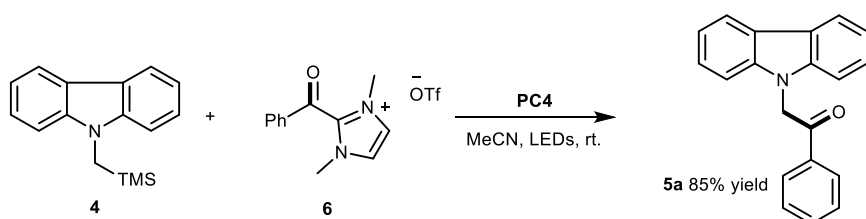

To a flame-dried Schlenk tube were added  $\alpha$ -silyl carbazole **4** (0.10 mmol, 1.0 equiv.), photocatalyst **PC4** (2% mmol) and 2-benzoyl-1,3-dimethyl-1H-imidazol-3-ium trifluoromethanesulfonate **6** (0.20 mmol, 2.0 equiv.). Then, the tube was evacuated and back-filled with argon three times. Subsequently, under the protection of Ar, MeCN (1.0 mL) was added via syringe. Then, the resulting suspension was stirred at room temperature for 1.0 h. The reaction mixture was concentrated under reduced pressure, and the resulting crude material was purified by column chromatography on silica gel (petroleum ether/ethyl acetate = 100/1, 50/1 to 20/1) to afford **5a** (24.3 mg, 85%).

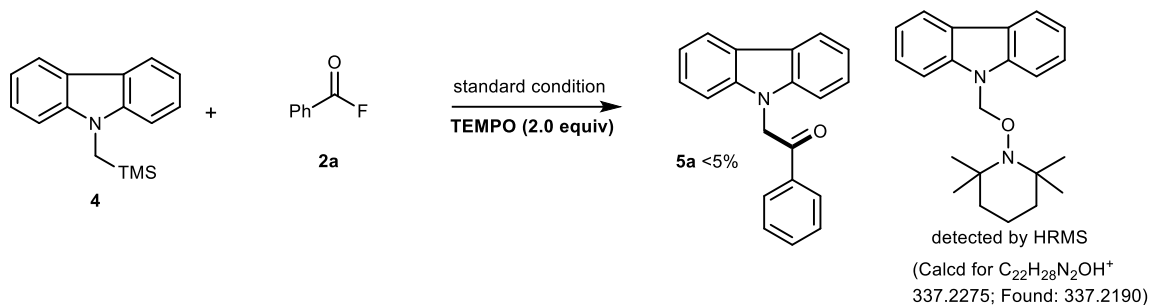

To a flame-dried Schlenk tube were added  $\alpha$ -silyl carbazole **4** (0.10 mmol, 1.0 equiv.), NHC **N1** (0.20 mmol, 0.2 equiv.), photocatalyst **PC4** (2% mmol),  $Cs_2CO_3$  (0.10 mmol, 1.0 equiv.) and 2,2,6,6-tetramethyl piperidine-N-oxyl (TEMPO, 0.20 mmol, 2.0 equiv.). Then, the tube was evacuated and back-filled with argon three times. Subsequently, under the protection of Ar, aroyl fluoride **2** (0.20 mmol, 2.0 equiv.) and MeCN (1.0 mL) were added via syringe. The resulting mixture was stirred at ambient temperature for 1.0 h. The reaction was found to be suppressed upon addition of TEMPO, and less than 5% yield of **5a** was obtained.

## 5.2 Light on-off experiments

The light-on experiments were performed according to the general procedure and set up five reactions in parallel. The corresponding yields were calculated by  $^1\text{H}$  NMR with  $\text{CH}_2\text{Br}_2$  as internal standard. The light on-off results indicated the reaction underwent a catalytic radical reaction rather than a radical chain pathway.

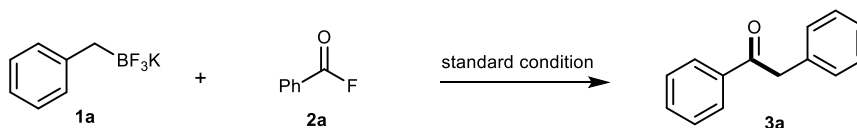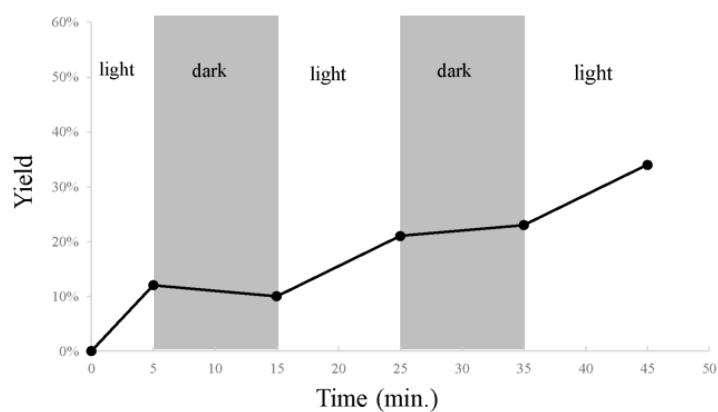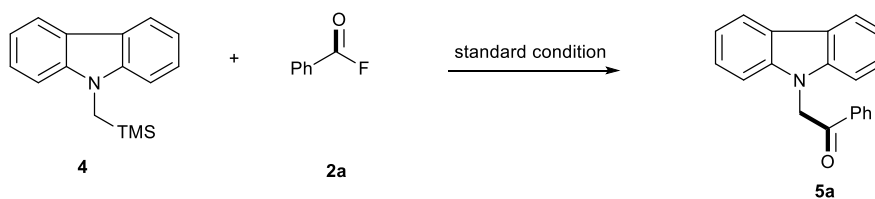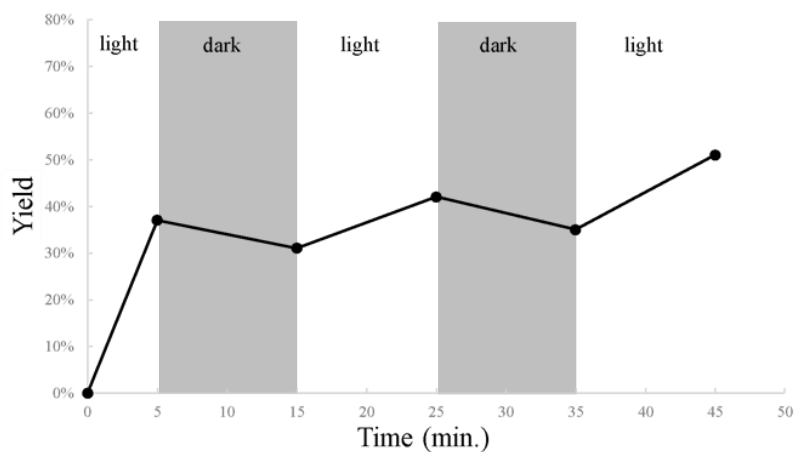

### 5.3 Quantum Yield Measurement for the reaction with alkyl trifluoroborates 1a and benzoyl fluoride 2a

The photon flux of the spectrophotometer was determined by ferrioxalate actinometry. A ferrioxalate actinometer solution was prepared according to literature procedures<sup>[6]</sup>. The ferrioxalate actinometer solution measures the decomposition of ferric ions to ferrous ions, which are complexed by 1,10-phenanthroline and monitored by UV/Vis absorbance at 510 nm. The moles of iron-phenanthroline complex formed are related to moles of photons absorbed. The solutions were prepared and stored in a dark laboratory (red light):

1. Potassium ferrioxalate solution: 59 mg of potassium ferrioxalate and 27.8  $\mu\text{L}$  of sulfuric acid (96%) were added to a 10 mL volumetric flask, and filled to the mark with water (HPLC grade).
2. Phenanthroline solution: 0.2% by weight of 1,10-phenanthroline in water (20 mg in 10 mL volumetric flask).
3. Buffer solution: to a 10 mL volumetric flask, 494 mg of NaOAc and 100  $\mu\text{L}$  of sulfuric acid (96%) were added and filled to the mark with water (HPLC grade).

To determine the photon flux of the spectrophotometer, 1.0 mL of the ferrioxalate solution was placed in a flame-dried Schlenk tube and irradiated for 30.0 seconds at  $\lambda = 450$  nm. The ferrioxalate solution was irradiated with five 30 W Blue LEDs which same light intensity as model reaction without stirring. After irradiation, the actinometer solution was removed and placed in a 10 mL volumetric flask containing 0.18 mL of 1,10-phenanthroline solution and 1 mL of buffer solution. This flask was filled to the mark with water (HPLC grade). The flask was then allowed to rest for 1 h to allow the ferrous ions to completely coordinate to the phenanthroline. The absorbance of the solution was measured at 510 nm. A non-irradiated sample was also prepared and the absorbance at 510 nm measured. Conversion was calculated using eq 1 .

$$\text{moles Fe}^{2+} = \frac{V1 \cdot V3 \cdot \Delta A(510 \text{ nm})}{10^3 \cdot V2 \cdot l \cdot \epsilon(510 \text{ nm})} \quad \text{eq 1}$$

where V1 is the irradiated volume (1 mL), V2 is the aliquot of the irradiated solution taken for the determination of the ferrous ions (1 mL), V3 is the final volume after complexation with phenanthroline (10 mL), l is the optical path-length of the irradiation cell (1 cm),  $\Delta A(510 \text{ nm})$  the optical difference in absorbance between the irradiated solution and the one stored in the dark,  $\epsilon(510 \text{ nm})$  is that of the complex  $\text{Fe}(\text{phen})_3^{2+}$  ( $11100 \text{ L mol}^{-1} \cdot \text{cm}^{-1}$ )

$$q_{n,p}^0 = \frac{\text{moles Fe}^{2+}}{\Phi \cdot t \cdot [1 - 10^{-A(\lambda)}]} \quad \text{eq 2}$$

Where  $\Phi$  is the quantum yield for the ferrioxalate actinometer (0.9 for a 0.011 M solution at  $\lambda = 450 \text{ nm}$ )<sup>[6b]</sup>, t is the time (30.0 s), and f is the fraction of light absorbed at  $\lambda = 450 \text{ nm}$ . The photon flux ( $q_{n,p}^0$ ) was calculated (average of three experiments) to be  $3.22 \times 10^{-8} \text{ einstein s}^{-1}$ .

$$\text{Sample calculation: moles } Fe^{2+} = \frac{1 \text{ mL} \cdot 10 \text{ mL} \cdot 0.482}{10^3 \cdot 1 \text{ mL} \cdot 1 \text{ cm} \cdot 11100 \text{ L mol}^{-1} \cdot \text{cm}^{-1}} = 4.3 \times 10^{-7} \text{ mol}$$

$$q_{n,p}^0 = \frac{4.3 \times 10^{-7} \text{ mol}}{0.9 \cdot 30 \text{ s} \cdot [1 - 10^{-0.276}]} = 3.39 \times 10^{-8} \text{ einstein s}^{-1}$$

The measurements for the reaction in this study were performed as follows: To a flame-dried Schlenk tube were added trifluoroborate **1a** (0.10 mmol, 1.0 equiv.), **N1** (0.20 mmol, 0.2 equiv.), photocatalyst **4** (2% mmol) and  $\text{Cs}_2\text{CO}_3$  (0.10 mmol, 1.0 equiv.), after which the tube was evacuated and back-filled with argon three times. Subsequently, under the protection of argon, aroyl fluoride **2a** (0.20 mmol, 2.0 equiv.) and acetone (2.0 mL) were added via syringe. The resulting mixture was stirred and irradiated ( $\lambda = 450 \text{ nm}$ ) at ambient temperature. The product **3a** was determined calculated by  $^1\text{H}$  NMR with  $\text{CH}_2\text{Br}_2$  as internal standard. The moles of product per unit of time are related to the number of photons absorbed. The moles of **3a** formed (x) are plotted as a function of time (t). The slope of this line was correlated to the moles of incident photons by unit of time by the use of the following eq 3.

$$\Phi(\lambda) = \frac{dx/dt}{q_{n,p}^0 [1 - 10^{-A(\lambda)}]} \quad \text{eq 3}$$

According to eq 3, the moles of **3a** formed (x) were plotted as a function of time (t):  $\Phi$  was the quantum yield to be determined and  $A(450 \text{ nm})$  was the absorption of the reaction under study.  $A(450 \text{ nm})$  was measured using a SHIMADZU UV-2450 UV/Vis spectrometer in 1 cm path quartz to carry out the measurements, obtaining an absorbance of 0.957.

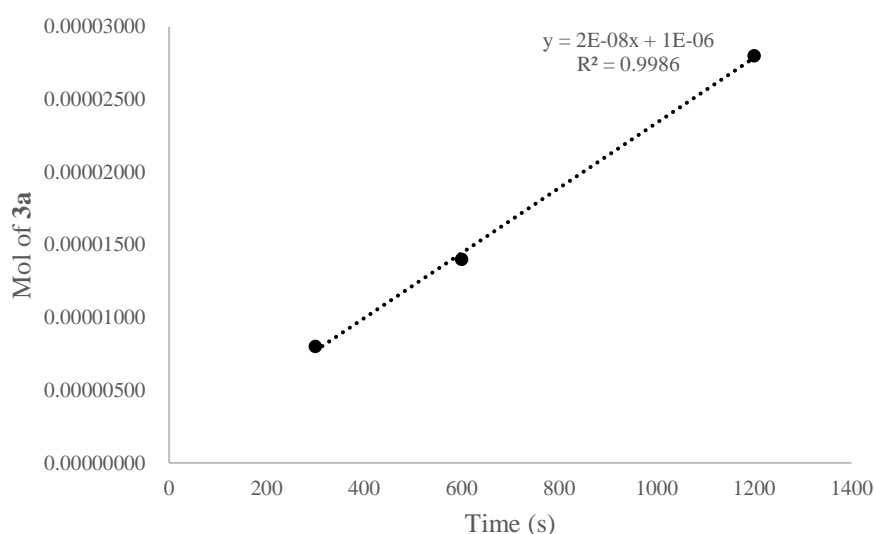

The quantum yield ( $\Phi$ ) of the reaction of alkyl trifluoroborates **1a** and benzoyl fluoride **2a** was calculated to be 0.69.

## 5.4 UV-vis Absorption

The UV-Vis absorption spectrum of **PC4** ( $10^{-4} \text{ M}$  in MeCN, A line), benzylic trifluoroborates **1a** ( $10^{-4} \text{ M}$  in MeCN, G line),  $\alpha$ -silyl carbazole **4** ( $10^{-4} \text{ M}$  in MeCN, B line) or



acyl azolium **6** ( $10^{-4}$  M in MeCN, H line) were respectively measured by SHIMADZU UV-2450 UV/Vis spectrometer. And the absorption spectrum of different combination of the reagents were also measured in MeCN using the same method. As shown in the following figure, the absorption spectrum of **PC4** revealed a significant absorption of visible light. By contrast, other compounds have little absorptions at the visible light region.

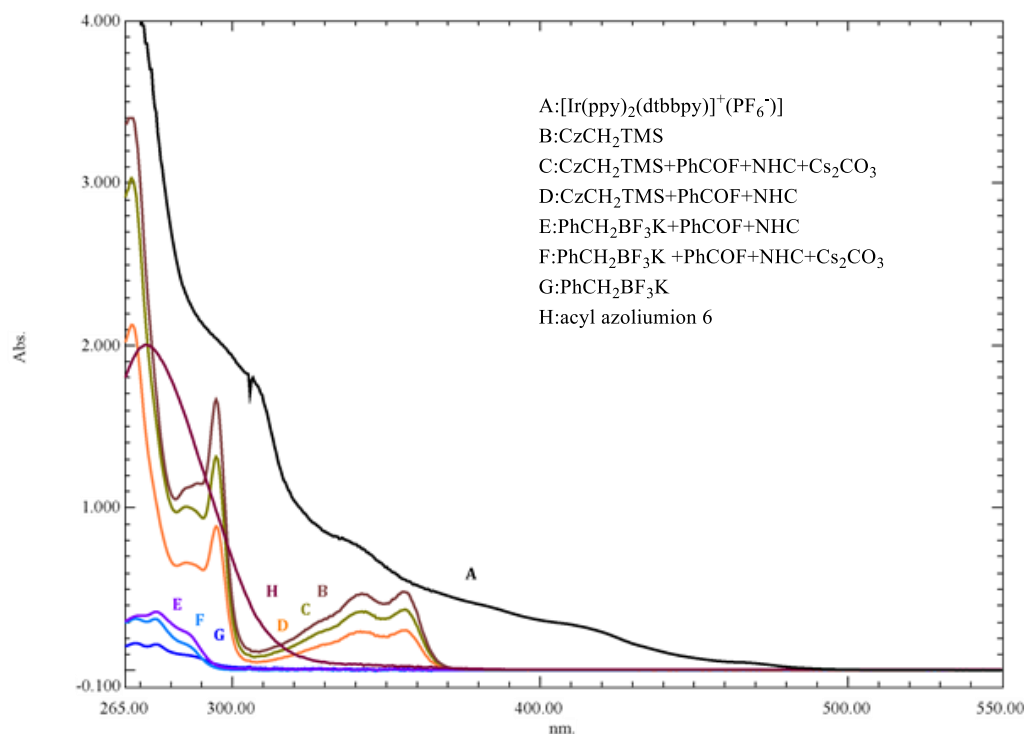

## 5.5 Luminescence quenching experiments

The fluorescence intensity was measured by HITACHI F-7000 spectrofluorometer. The sample was prepared by adding 100  $\mu\text{L}$  of  $10^{-4}$  M solution of **PC4** and degassed MeCN solution of benzylic trifluoroborates **1a**,  $\alpha$ -silyl carbazole **4** or acyl azolium **6** (quencher) in different concentrations ( $4 \times 10^{-3}$ ,  $8 \times 10^{-3}$ ,  $12 \times 10^{-3}$ ,  $20 \times 10^{-3}$ ,  $24 \times 10^{-3}$ , or  $32 \times 10^{-3}$  M, respectively), and mixed. All **PC4** solutions were excited at 460 nm and the emission intensity was collected at 500-700 nm.

The Stern-Volmer fluorescence quenching experiments revealed that only acyl azolium **6** could quench the excited state of  $\text{Ir}^*(\text{III})$ , while no significant quenching phenomenon was observed with benzylic trifluoroborates **1a** or  $\alpha$ -silyl carbazole **4**.

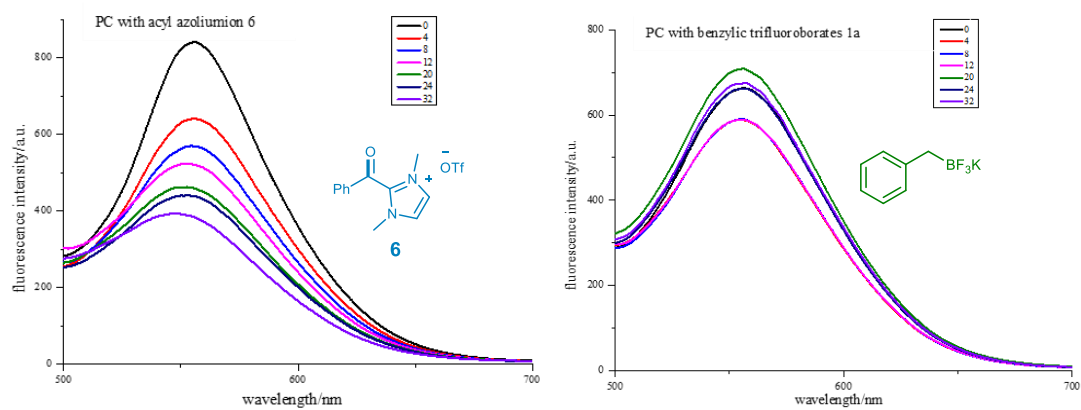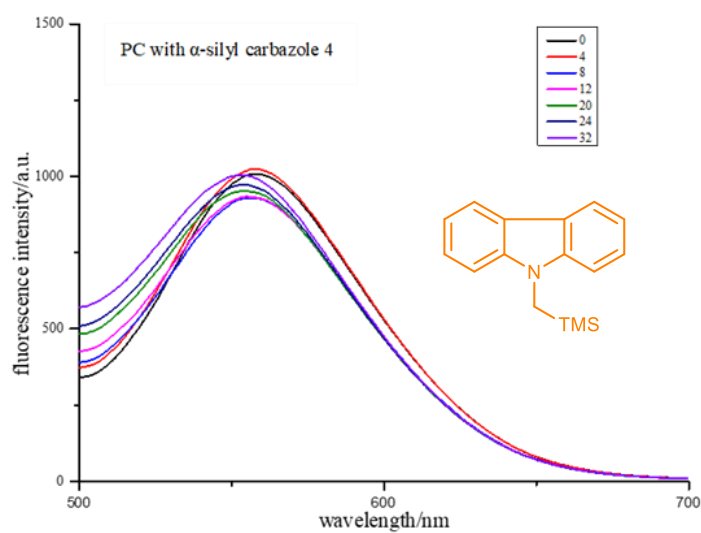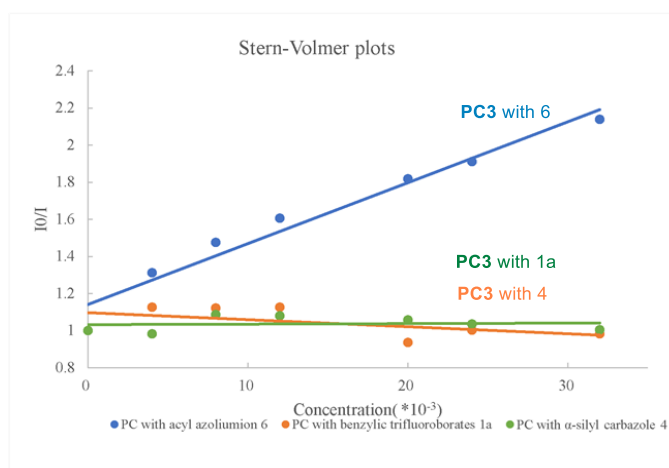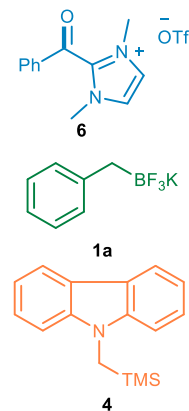

## 5.6 Cyclic Voltammograms

Electrochemical measurements were recorded by a Metrohm Autolab analyzer. Cyclic voltammetry (CV) experiments were conducted by using a 10 mL glass vial which fitted with a platinum sheet as working electrode, calomel electrode as reference electrode, and a platinum sheet as counter electrode. The electrolyte of  $n\text{Bu}_4\text{NPF}_6$  (0.05 M) was dissolved in dry MeCN as blank control experiment. (Sweep rate: 100 mV/s)

The redox potential of  $\alpha$ -silyl carbazole **4** was determined by cyclic voltammetry ( $\alpha$ -silyl carbazole **4** (0.01M) in [0.05 M]  $n\text{Bu}_4\text{NPF}_6$  in MeCN). The Cyclic voltammogram of  $\alpha$ -silyl carbazole **4** feature irreversible peak at  $E_{\text{ox}} = E_{\text{pa}} = + 0.78$  V vs SCE.  $E_{\text{pa}}$  is the anodic peak potential, while  $E_{\text{ox}}$  value describes the electrochemical properties of  $\alpha$ -silyl carbazole **4**.

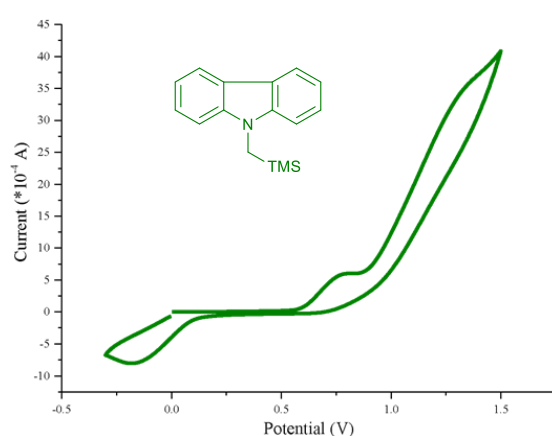

Cyclic voltammogram of benzylic trifluoroborates **1a** solutions feature irreversible peak at  $E_{\text{ox}} = E_{\text{pa}} = + 0.72$  V vs SCE.  $E_{\text{pa}}$  is the anodic peak potential, while  $E_{\text{ox}}$  value describes the electrochemical properties of benzylic trifluoroborates **1a**.

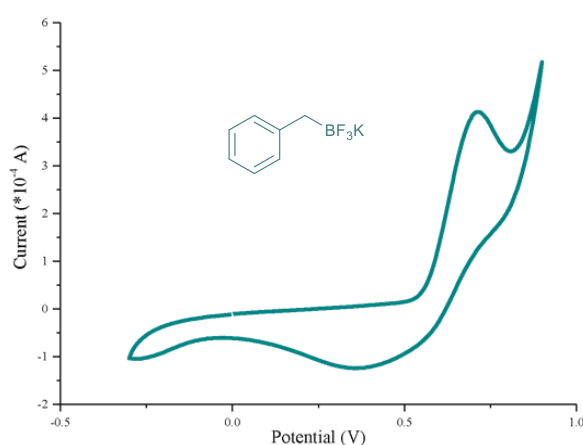

Cyclic voltammogram of acylazoliums **6** solutions feature irreversible peak at  $E_{\text{red}} = E_{\text{pc}} = -1.31 \text{ V}$  vs SCE.  $E_{\text{pc}}$  is the cathodic peak potential, while  $E_{\text{red}}$  value describes the electrochemical properties of acylazoliums **6**.

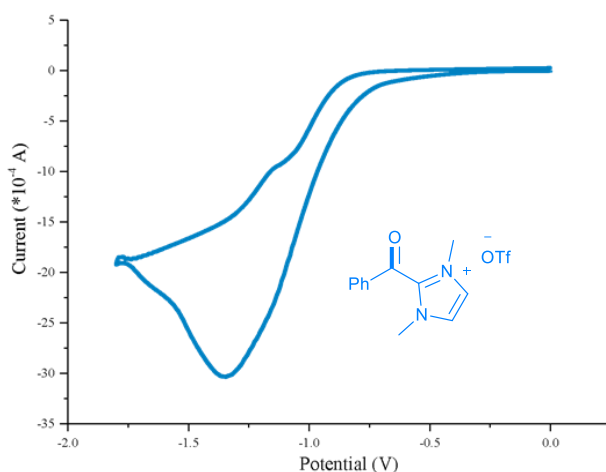

- We have checked and compared the excited-state triplet energy ( $\Delta G_{(\text{T1-S0})}$ ) of the photocatalysts<sup>[7]</sup> screened in the catalytic reaction. And the oxidation potential ( $E_{1/2} \text{ M}^+/\text{M}^*$ ) of the photocatalysts as well as the isolated yields of the target products were also listed, respectively. As shown in the following figure, we can recognize that when the excited-state triplet energy of a photocatalyst is greater than (or similar to) **PC4**, such as **PC5**, **PC1**, and **PC11**, the catalytic reaction could proceed smoothly. Accordingly, if the excited-state triplet energy of a photocatalyst is slightly lower than **PC4**, such as **PC12** and **PC13**, the reaction efficiency decreased. And no reaction was observed when the triplet energy of photocatalyst (such as **PC15**) is significantly lower than **PC4**. On the other hand, the oxidation potential of these photocatalysts (generally higher than the reduction potential of the substrates  $E_{\text{red}} = -1.31 \text{ V}$  vs. SCE) did not match the reaction outcome of the photocatalytic system. Based on the above comparison, we may suggest that a single-electron transfer between the excited photocatalyst and acylazolium is unlikely, but an energy transfer (EnT) process might be feasible. (It should be noted that the reaction with **PC2** is messy, therefore the reaction results of **PC2** did not match neither of the SET pathway nor EnT pathway.).

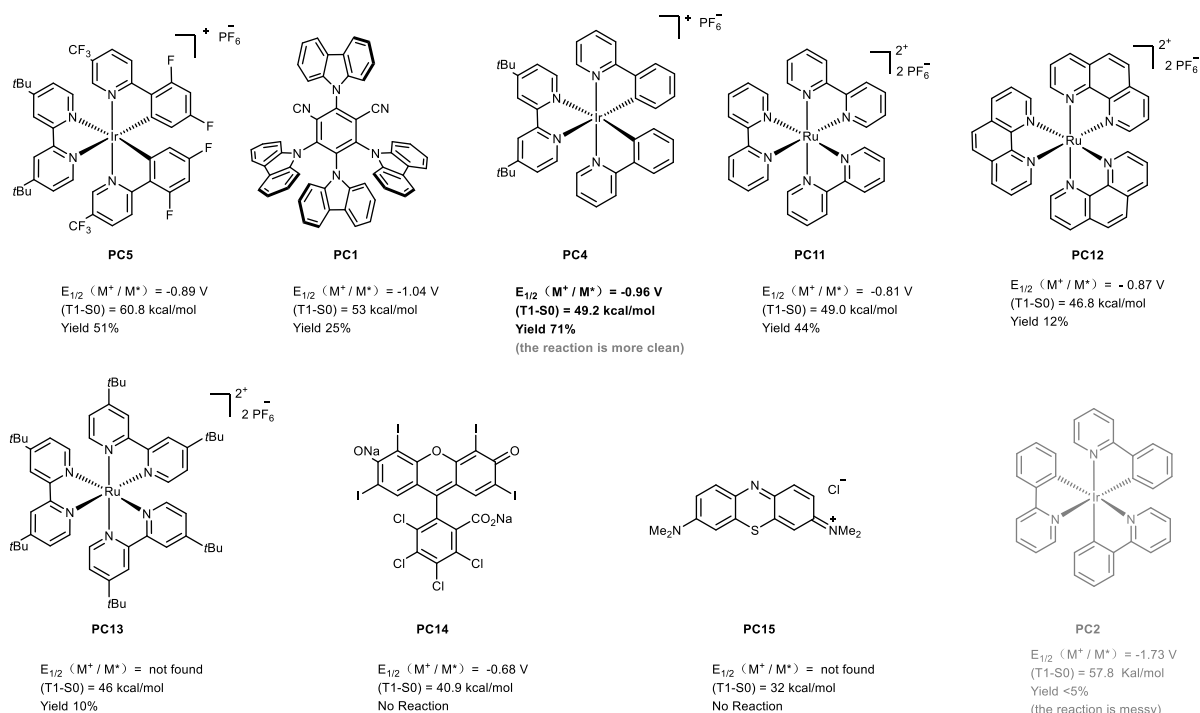

## 5.7 DFT Calculations

Computational details: Density functional theory (DFT) calculations were performed with the Gaussian 09 program package.<sup>[8]</sup> The SMD continuum solvation model<sup>[9]</sup> was employed to simulate the solvent effect of acetone solution. Full geometry optimizations were operated to locate all of the stationary points, using (U)B3LYP<sup>[10]</sup> and (U)M06-2X<sup>[11]</sup> density functional theory methods with the LANL2DZ basis set and effective core potential for Ir atom, as well as the 6-31G(d,p) basis set<sup>[12]</sup> for all other atoms, where the spin-restricted DFT method for closed-shell species (acyl azoliumion **6**, triazolium salt **7**, and **PC4**) and the spin-unrestricted DFT method with the “guess(mix, always)” keyword for open-shell triplet species (**6-T<sub>1</sub>**, **7-T<sub>1</sub>**, and **PC4-T<sub>1</sub>**). In the meantime, the stability of the density function theory (DFT) wave-function of the auxiliary Kohn–Sham determinant was examined.<sup>[13]</sup> Harmonic vibrational frequency calculations were conducted to characterize all stationary point. Herein, minima have zero imaginary frequencies. Unless mentioned otherwise, the triplet-singlet energy gap [ $\Delta G(T_1-S_0)$ ] were obtained at the levels of (U)B3LYP/6-31G(d,p),LANL2DZ + SMD(acetone) and (U)M06-2X/6-31G(d,p),LANL2DZ + SMD(acetone), under experimental temperature and pressure (298.15 K and 1 atm).

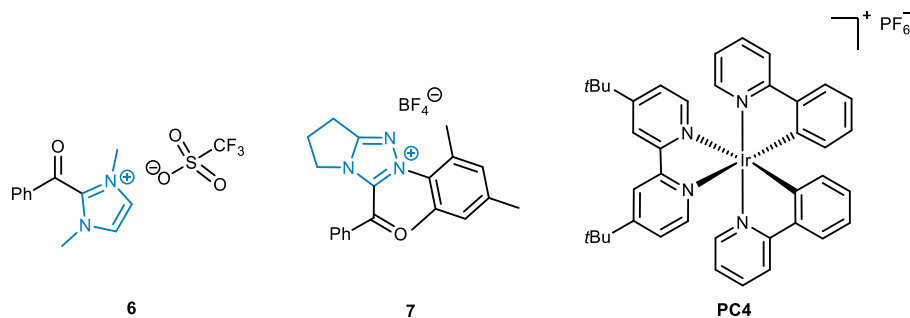

| DFT Calculation level                             | $\Delta G(T_1-S_0)/\text{kcal mol}^{-1}$ |             |                         |
|---------------------------------------------------|------------------------------------------|-------------|-------------------------|
|                                                   | <b>6</b>                                 | <b>7</b>    | <b>PC4</b> <sup>a</sup> |
| <b>(U)B3LYP/6-31G(d,p),LANL2DZ + SMD(acetone)</b> | <b>39.5</b>                              | <b>27.1</b> | <b>49.7</b>             |
| (U)M06-2X/6-31G(d,p),LANL2DZ + SMD(acetone)       | 50.9                                     | 29.9        | 59.2                    |

<sup>a</sup> The experimentally determined triplet-singlet energy gap  $\Delta G(T_1-S_0)$  of **PC4** is 49.2 kcal/mol.<sup>[7]</sup>

As shown in Table S1, the calculated triplet-singlet energy gap [ $\Delta G(T_1-S_0)$ ] of **PC4** is 49.7 kcal/mol at the (U)B3LYP/6-31G(d,p),LANL2DZ + SMD(acetone) level, which is in close proximity to experimentally determined result (49.2 kcal/mol). For comparison, we also performed DFT calculation at (U)M06-2X/6-31G(d,p),LANL2DZ + SMD(acetone) level. The result indicated that the [ $\Delta G(T_1-S_0)$ ] of **PC4** is 59.2 kcal/mol, which is dramatically higher than the experimentally [ $\Delta G(T_1-S_0)$ ] of 49.2 kcal/mol. Thus, the calculated triplet-singlet energy gaps [ $\Delta G(T_1-S_0)$ ] of acylazolium **6** and triazolium salt **7** by using (U)B3LYP functional are discussed in the manuscript. Moreover, the calculated [ $\Delta G(T_1-S_0)$ ] of **6** and **7** are 39.5 and 27.1 kcal/mol, which are below the theoretical and experimental [ $\Delta G(T_1-S_0)$ ] values of **PC4** (49.7 and 49.2 kcal/mol). These results corroborate well with experimentally observed phenomenon.

## 6. References and Notes.

1. (a) E. E. Stache, T. Rovis and A. G. Doyle, *Angew.Chem. Int.Ed.*, 2017, **56**, 3679-3683; (b) J. Luo, B. Hu, W. D. Wu, M. W. Hu and T. L. Liu, *Angew.Chem. Int.Ed.*, 2021, **60**, 6107-6116.
2. F.-F. Pan, P. Guo, C.-L. Li, P. Su and X.-Z. Shu, *Org. Lett.*, 2019, **21**, 3701-3705.
3. W. Guo, H. Ding, C. Gu, Y. Liu, X. Jiang, B. Su and Y. Shao, *J. Am. Chem. Soc.*, 2018, **140**, 15904-15915.
4. K. B. Ling and A. D. Smith, *Chem. Commun.*, 2011, **47**, 373-375.
5. (a) B. A. Dalvi and P. D. Lokhande, *Tetrahedron Lett.*, 2018, **59**, 2145-2149; (b) M.-L. Louillat, A. Biafora, F. Legros and F. W. Patureau, *Angew. Chem. Int. Ed.*, 2014, **53**, 3505-3509; (c) W. Qu, Z. Gao, W. Li, X. Fan, Y. Shi, Y. Miao, G. Yu, H. Zhou, J. Huang and H. Wang, *Dyes Pigments*, 2021, **196**, 109808.
6. (a) A. Bahamonde and P. Melchiorre, *J. Am. Chem. Soc.*, 2016, **138**, 8019-8030; (b) M. A. Cismesia and T. P. Yoon, *Chem. Sci.*, 2015, **6**, 5426-5434.
7. (a) M. Teders, C. Henkel, L. Anhäuser, F. Strieth-Kalthoff, A. Gómez-Suárez, R. Kleinmans, A. Kahnt, A. Rentmeister, D. Guldi and F. Glorius, *Nat. Chem.*, 2018, **10**, 981-988; (b) F. Strieth-Kalthoff, M. J. James, M. Teders, L. Pitzera and F. Glorius, *Chem. Soc. Rev.*, 2018, **47**, 7190-7202.
8. M. J. Frisch, G. W. Trucks, H. B. Schlegel, G. E. Scuseria, M. A. Robb, J. R. Cheeseman, G. Scalmani, V. Barone, B. Mennucci, G. A. Petersson, H. Nakatsuji, M. Caricato, X. Li H. P. Hratchian, A. F. Izmaylov, J. Bloino, G. Zheng, J. L. Sonnenberg, M. Hada, M. Ehara, K. Toyota, R. Fukuda, J. Hasegawa, M. Ishida, T. Nakajima, Y. Honda, O. Kitao, H. Nakai, T. Vreven, J. A. Jr. Montgomery, J. E. Peralta, F. Ogliaro, M. Bearpark, J. J. Heyd, E. Brothers, K. N. Kudin, V. N. Staroverov, R. Kobayashi, J. Normand, K. Raghavachari, A. Rendell, J. C. Burant, S. S. Iyengar, J. Tomasi, M. Cossi, N. Rega, J. M. Millam, M. Klene, J. E. Knox, J. B. Cross, V. Bakken, C. Adamo, J. Jaramillo, R. Gomperts, R. E. Stratmann, O. Yazyev, A. J. Austin, R. Cammi, C. Pomelli, J. W. Ochterski, R. L. Martin, K. Morokuma, V. G. Zakrzewski, G. A. Voth, P. Salvador, J. J. Dannenberg, S. Dapprich, A. D. Daniels, O. Farkas, J. B. Foresman, J. V. Ortiz, J. Cioslowski and D. J. Fox, Gaussian 09, Revision C.01, Gaussian, Inc., Wallingford CT, 2010.
9. A. V. Marenich, C. J. Cramer and D. G. Truhlar, *J. Phys. Chem. B*, 2009, **113**, 6378-6396.
10. (a) A. D. Becke, *J. Chem. Phys.*, 1993, **98**, 5648; (b) C. Lee, W. Yang and R. G. Parr, *Phys. Rev. B*, 1988, **37**, 785-789.
11. (a) Y. Zhao and D. G. Truhlar, *Theor. Chem. Acc.*, 2008, **120**, 215-241; (b) Y. Zhao and D. G. Truhlar, *Acc. Chem. Res.*, 2008, **41**, 157-167.
12. (a) R. Krishnan, J. S. Binkley, R. Seeger and J. A. Pople, *J. Phys. Chem.*, 1980, **72**, 650-654; (b) A. D. McLean and G.S. Chandler, *J. Chem. Phys.*, 1980, **72**, 5639-5648.
13. R. Bauernschmitt and R. Ahlrichs, *J. Chem. Phys.*, 1996, **104**, 9047-9052.

## 7. Copies of $^1\text{H}$ , $^{13}\text{C}$ NMR Spectra

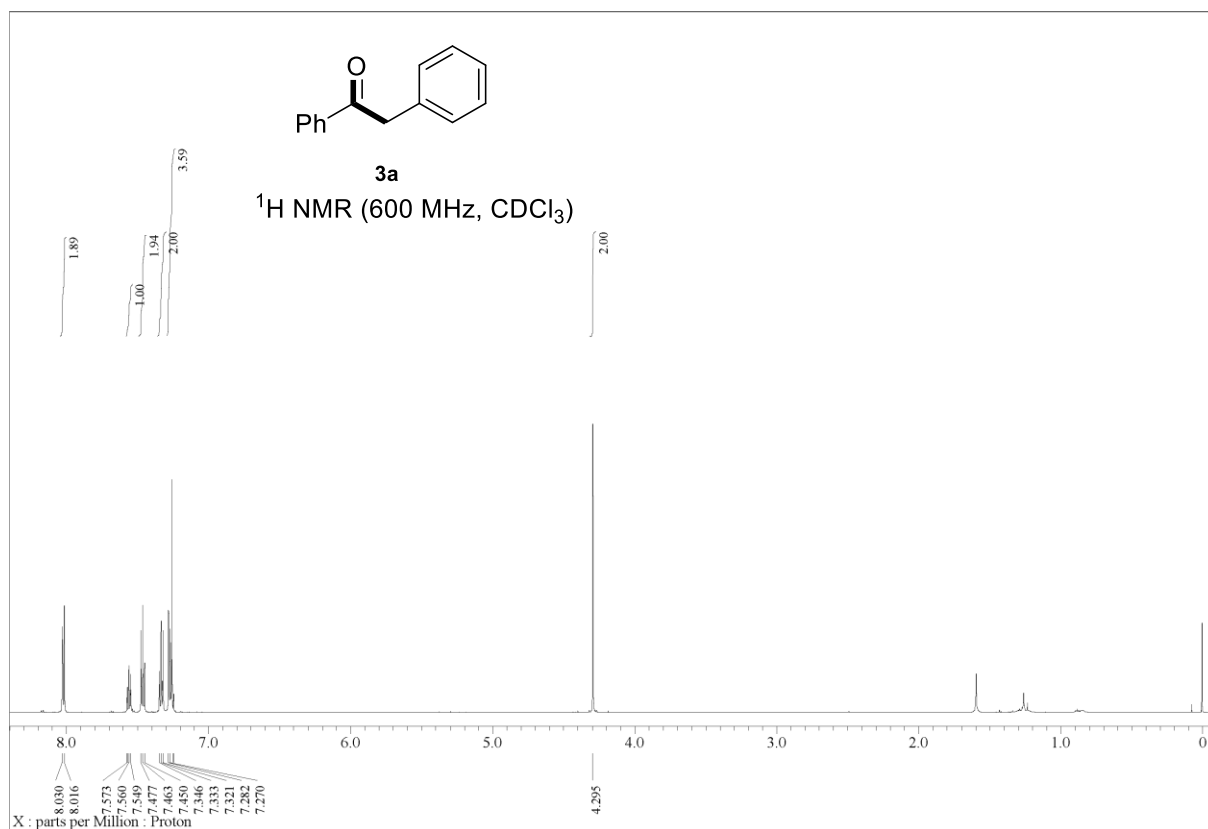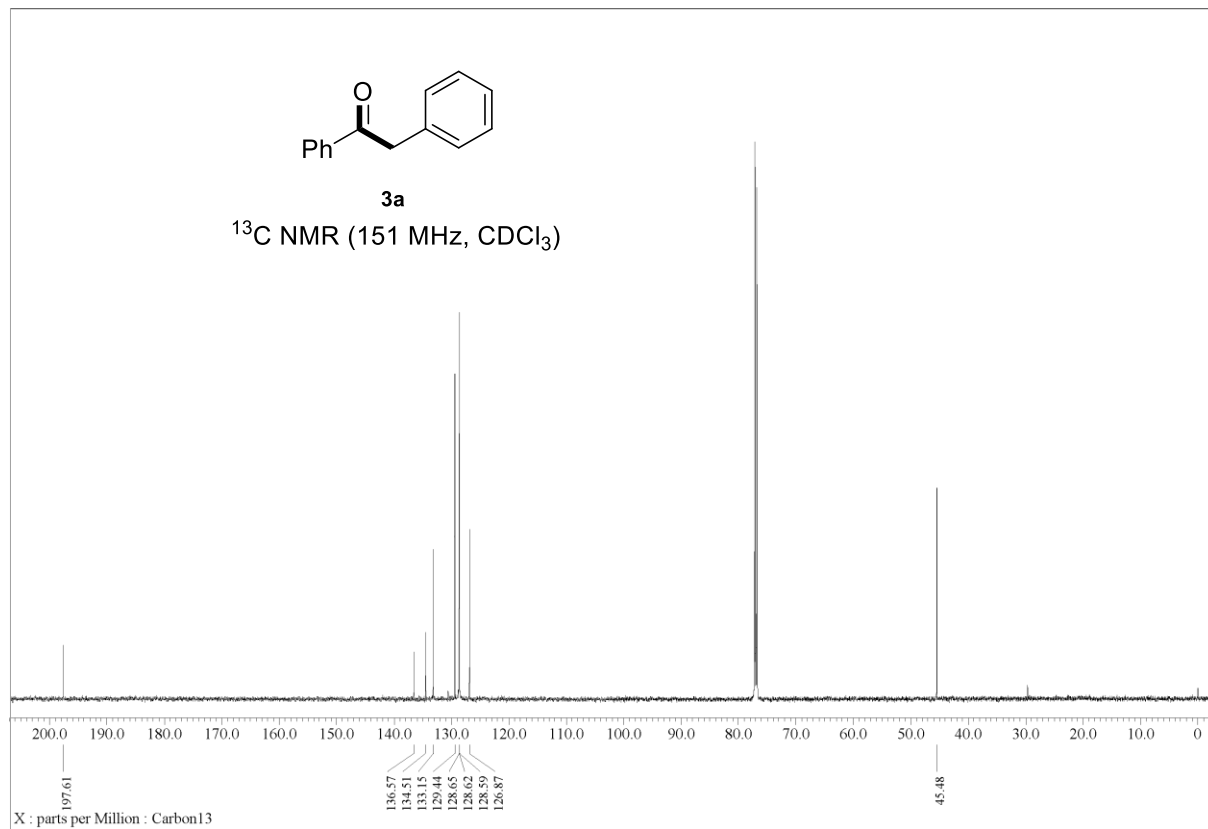



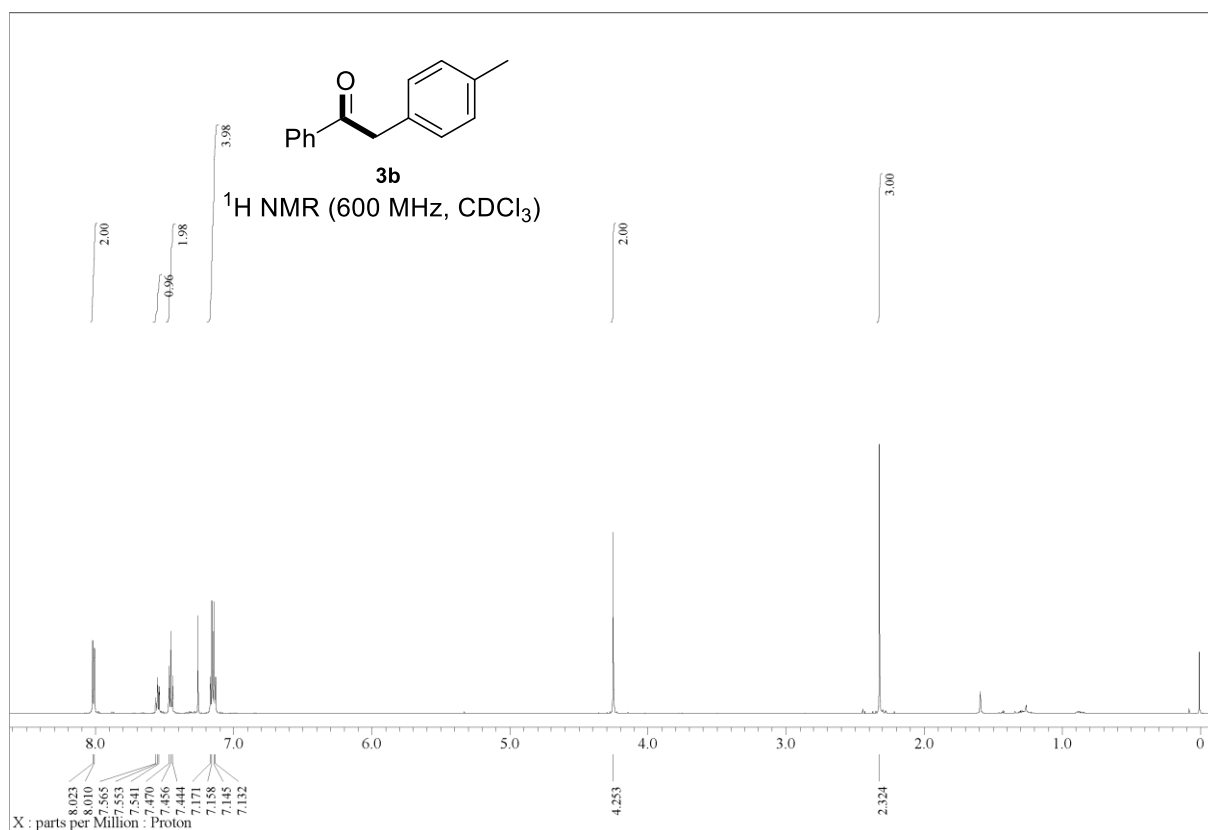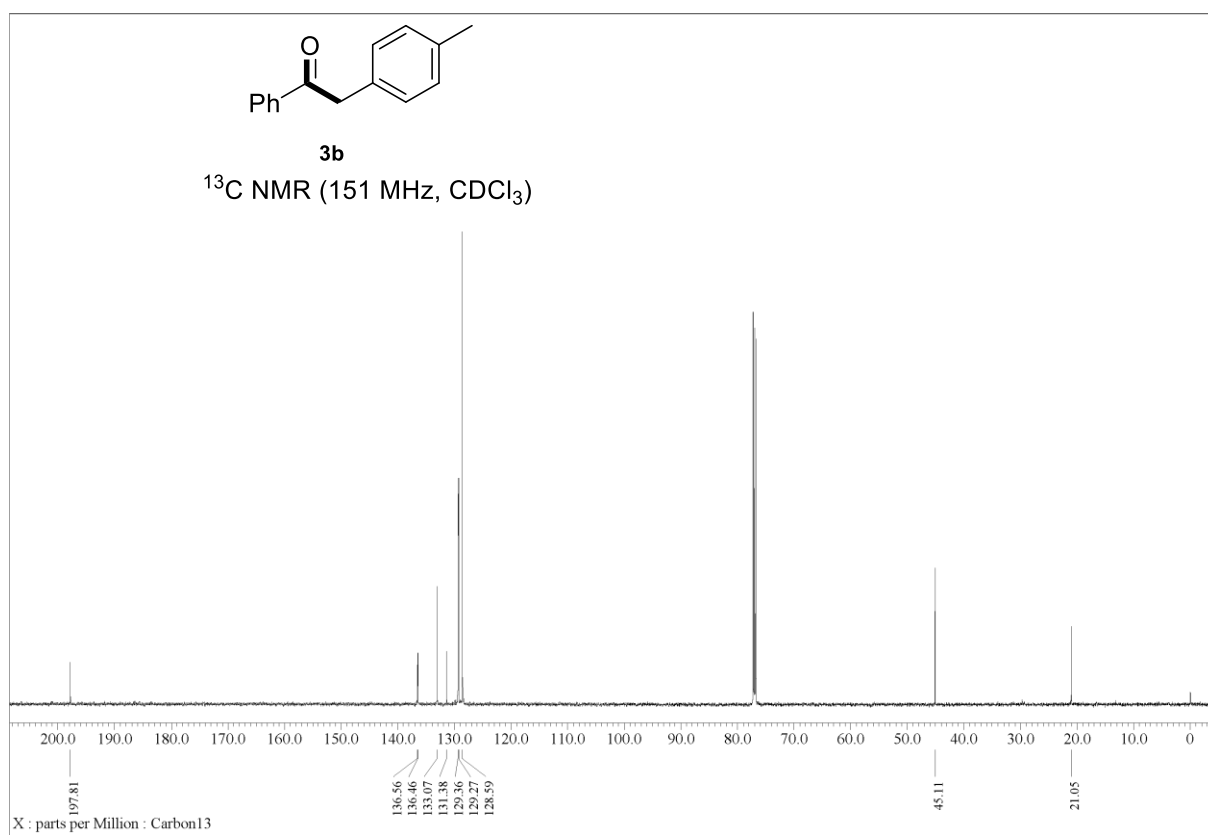

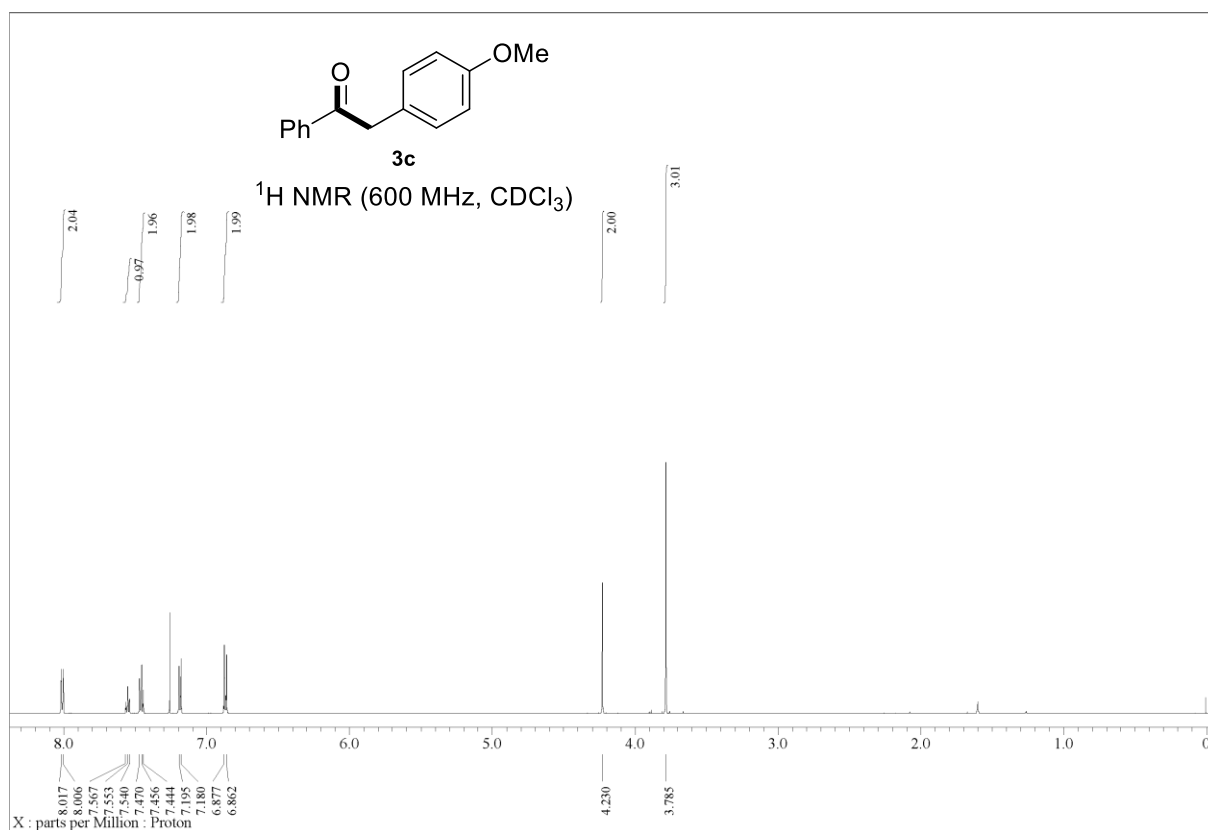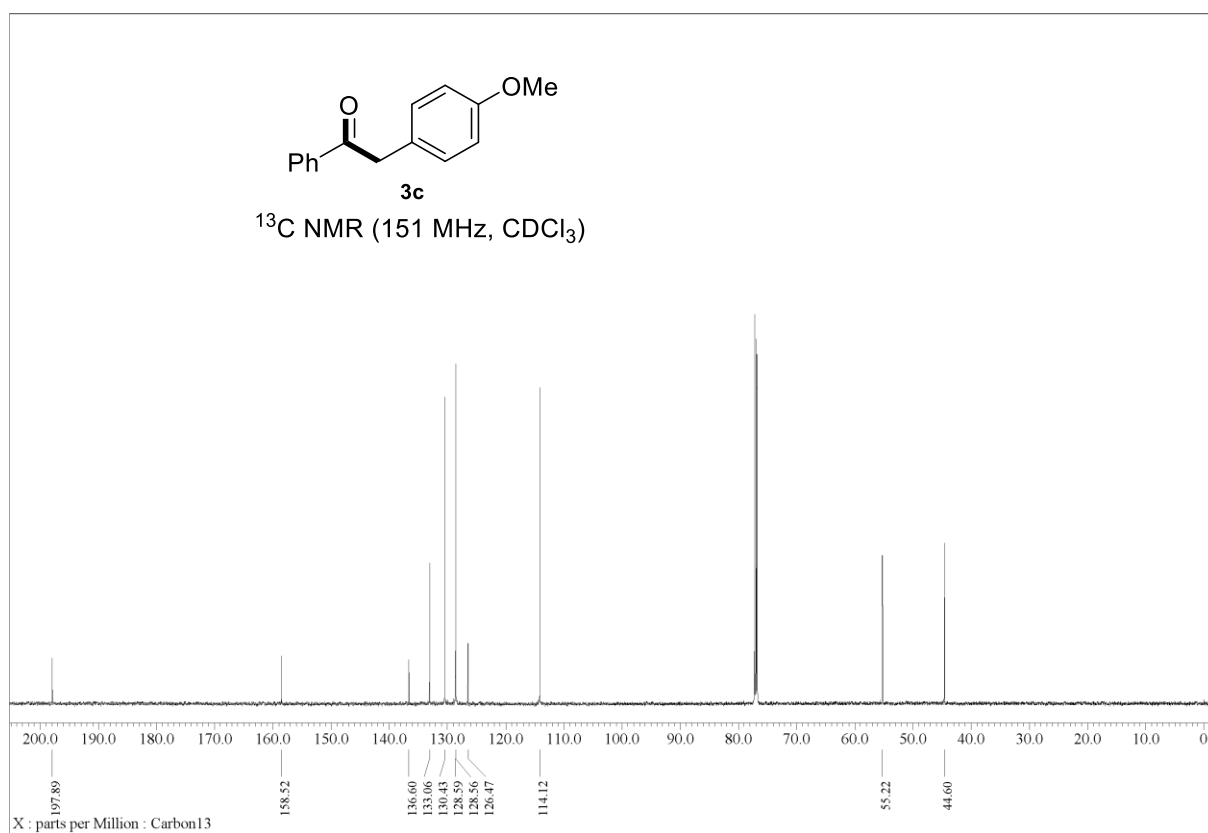

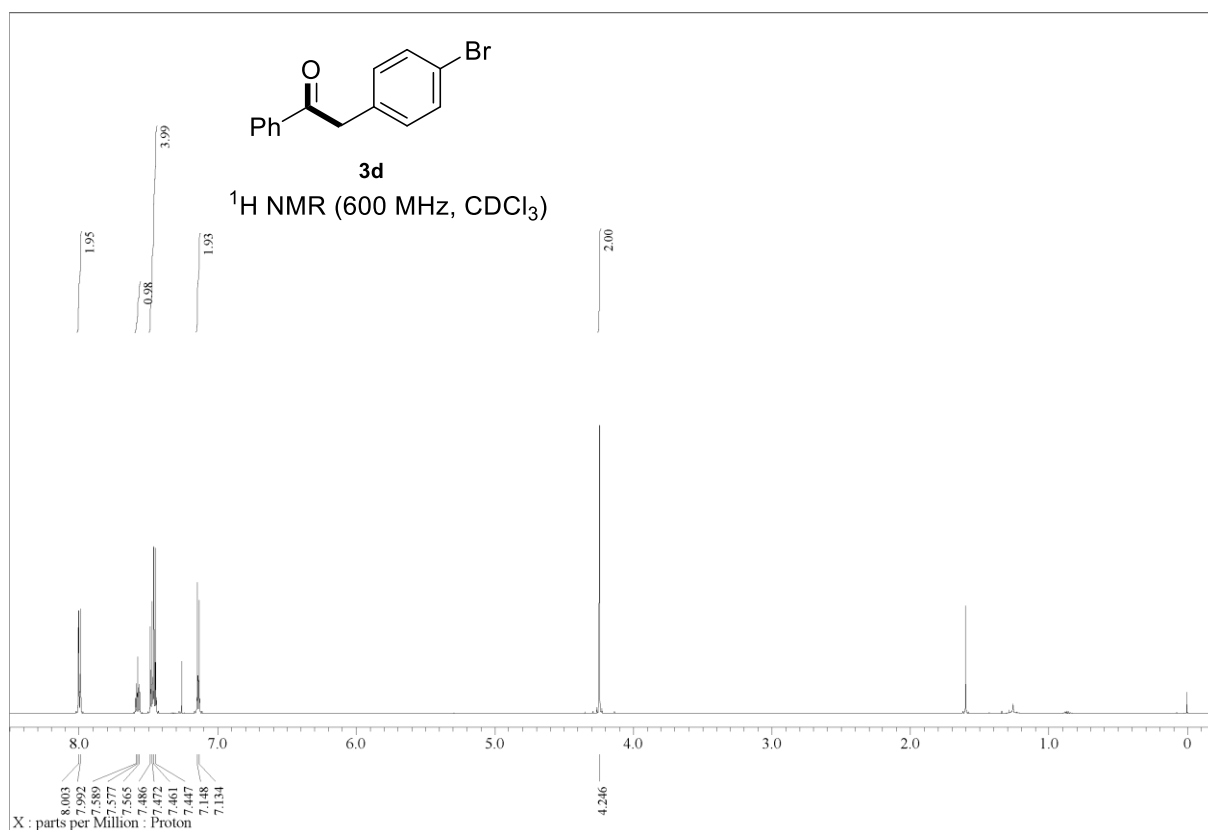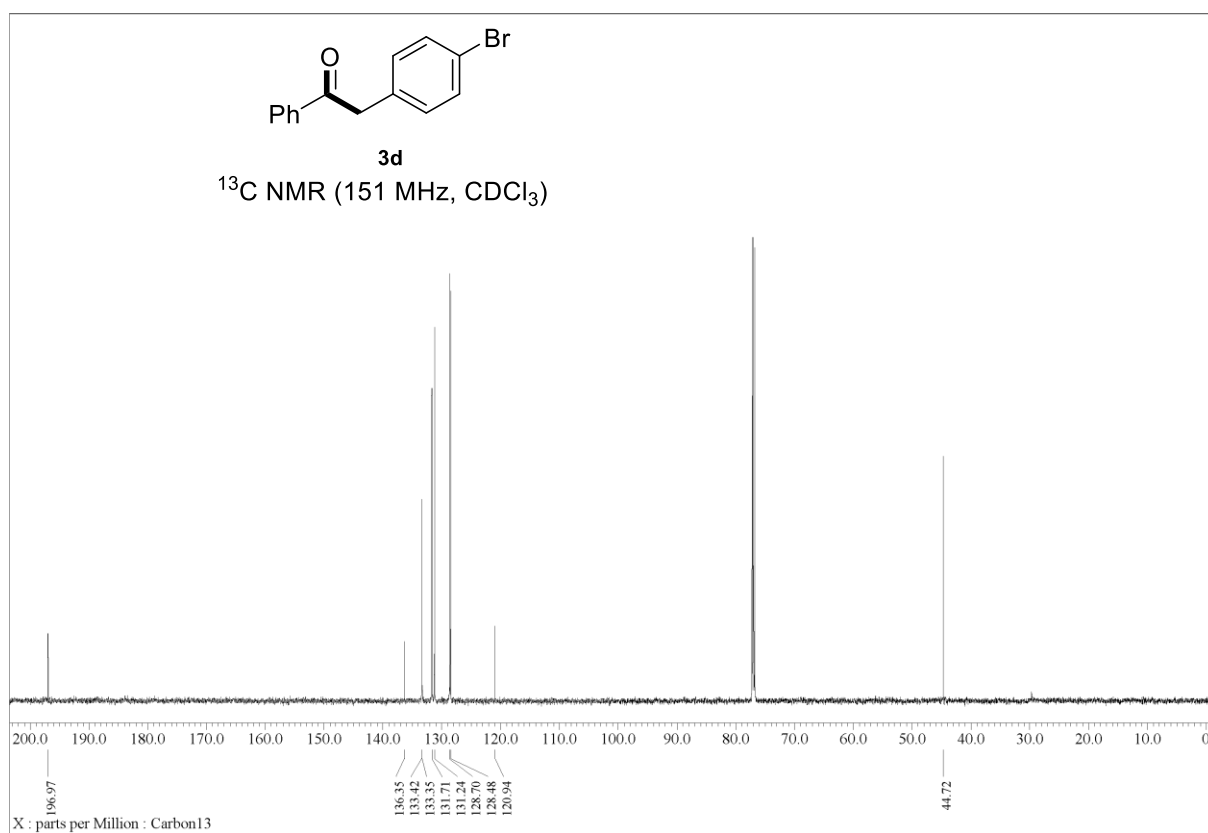

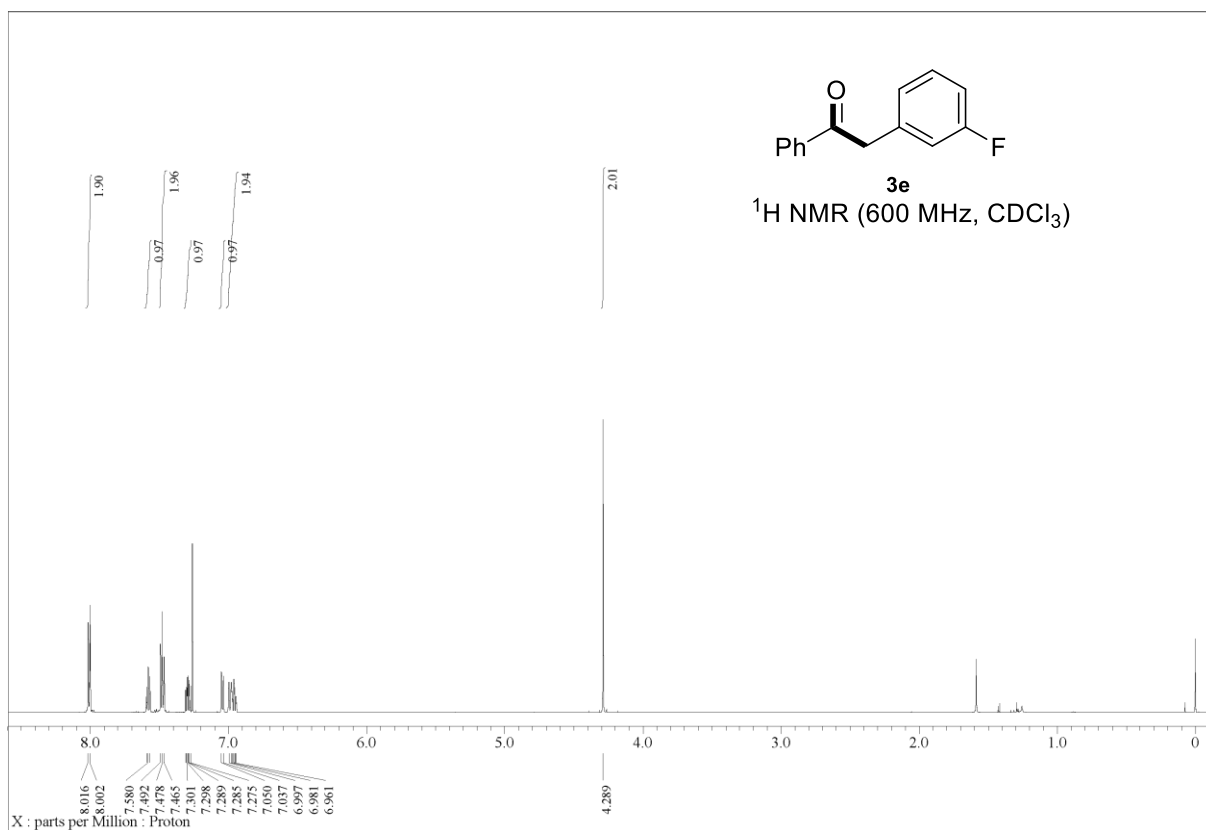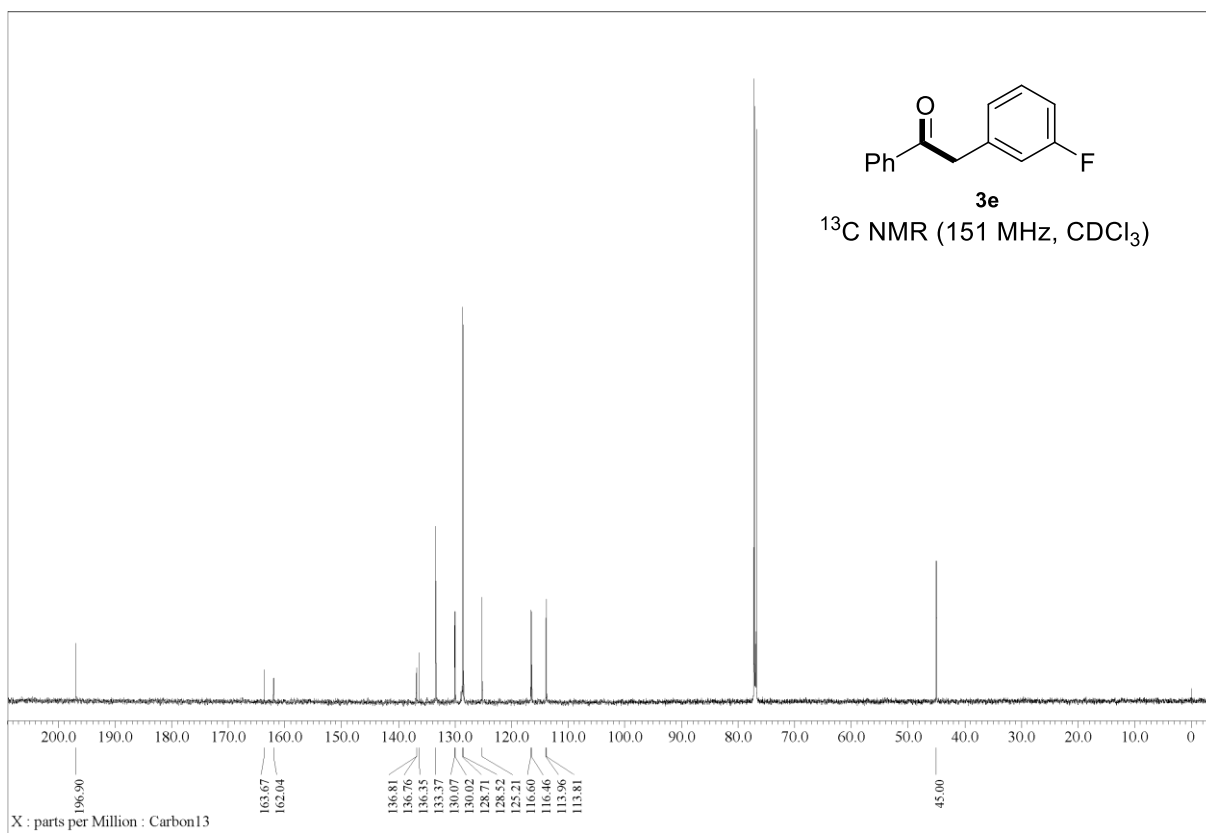

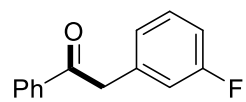

**3e**

$^{19}\text{F}$  NMR (564 MHz,  $\text{CDCl}_3$ )

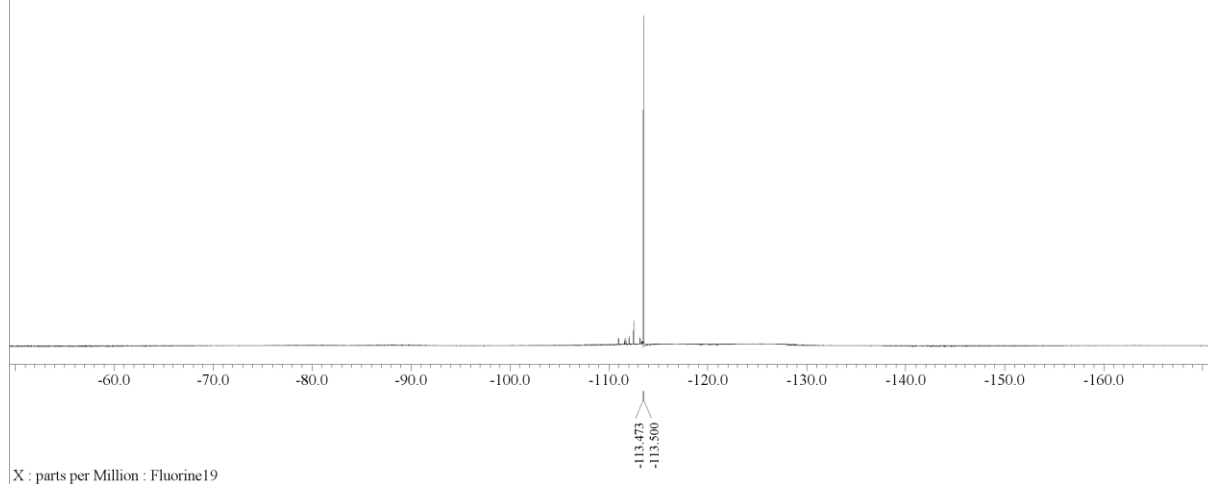

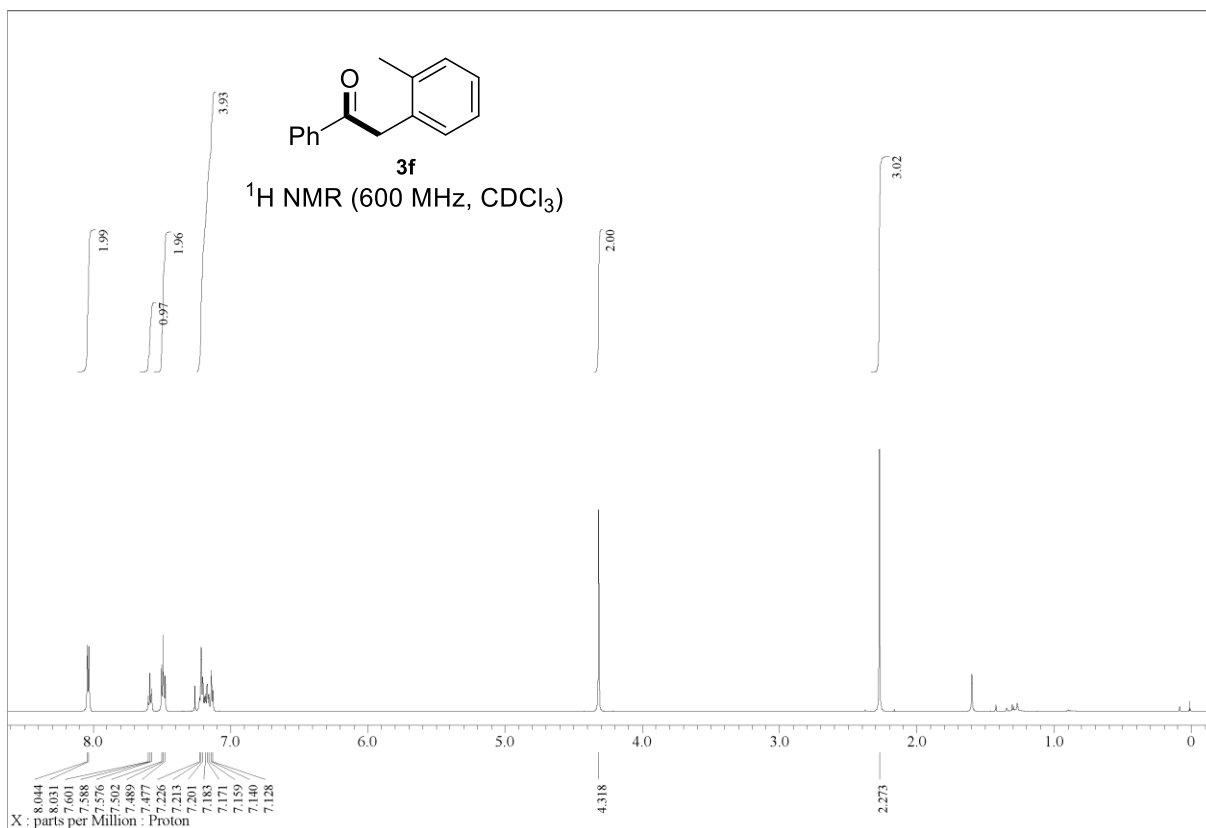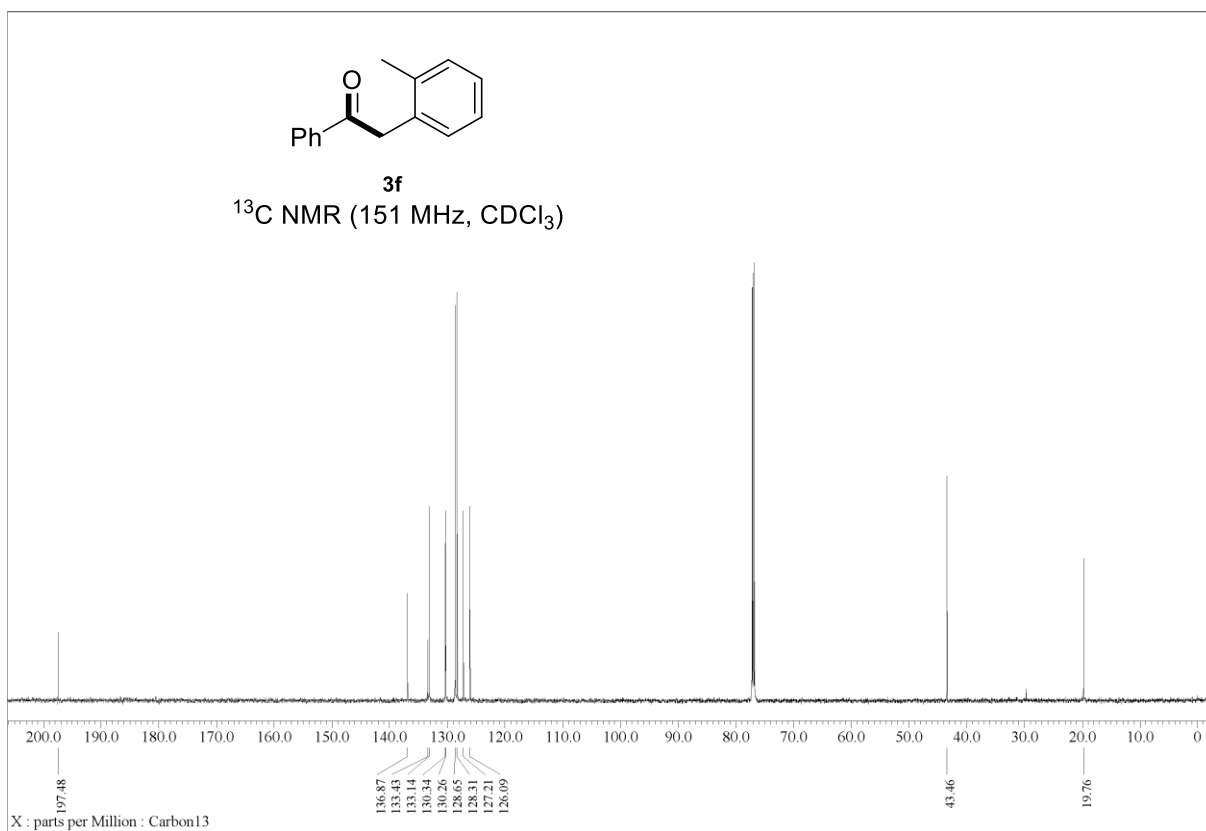

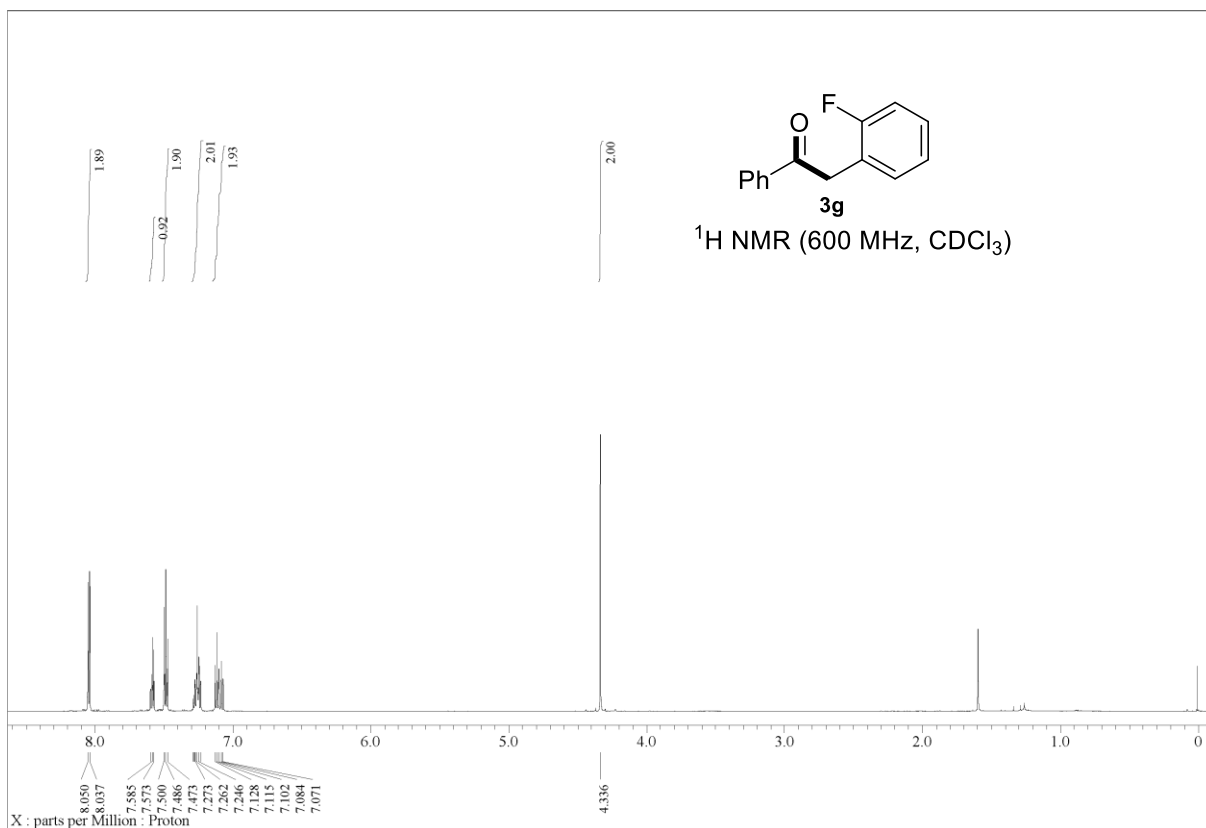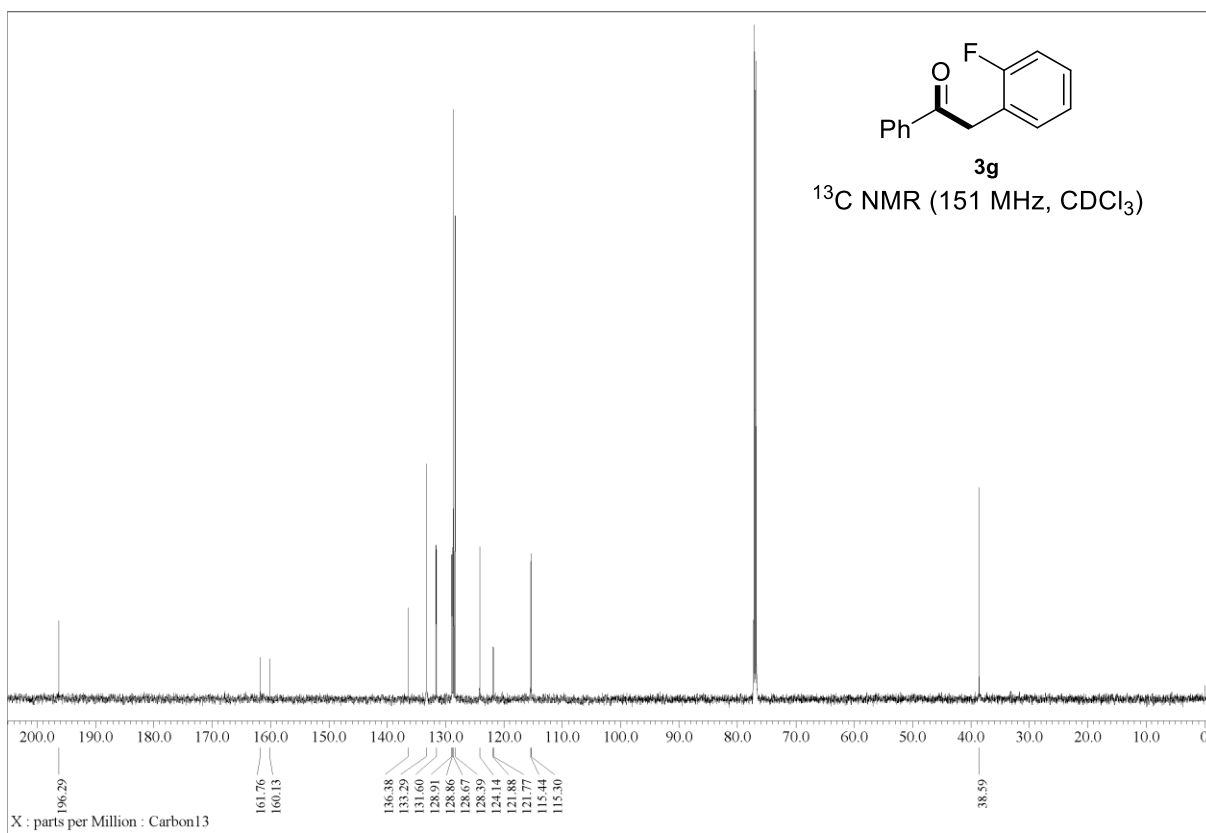

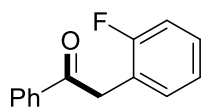

**3g**

<sup>19</sup>F NMR (564 MHz, CDCl<sub>3</sub>)

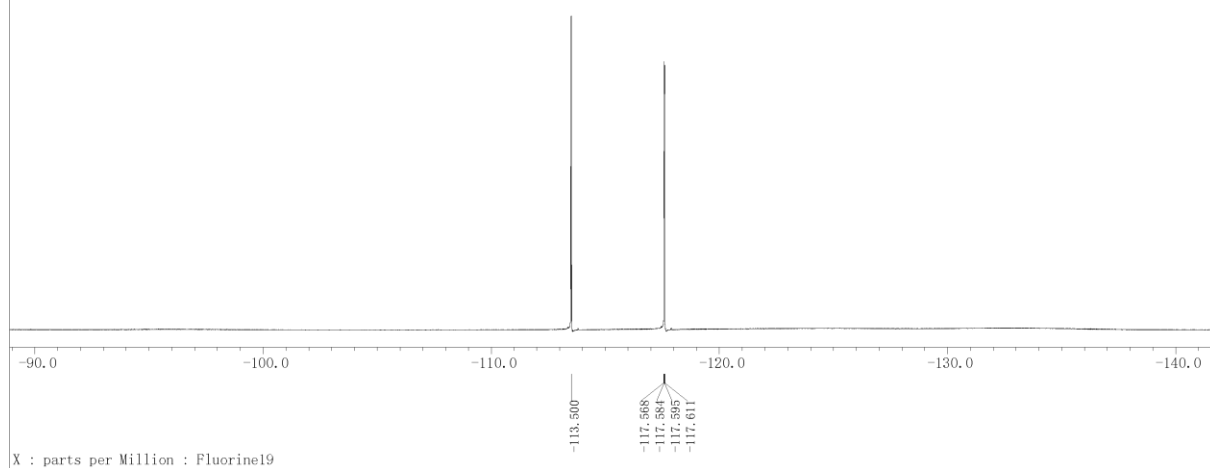



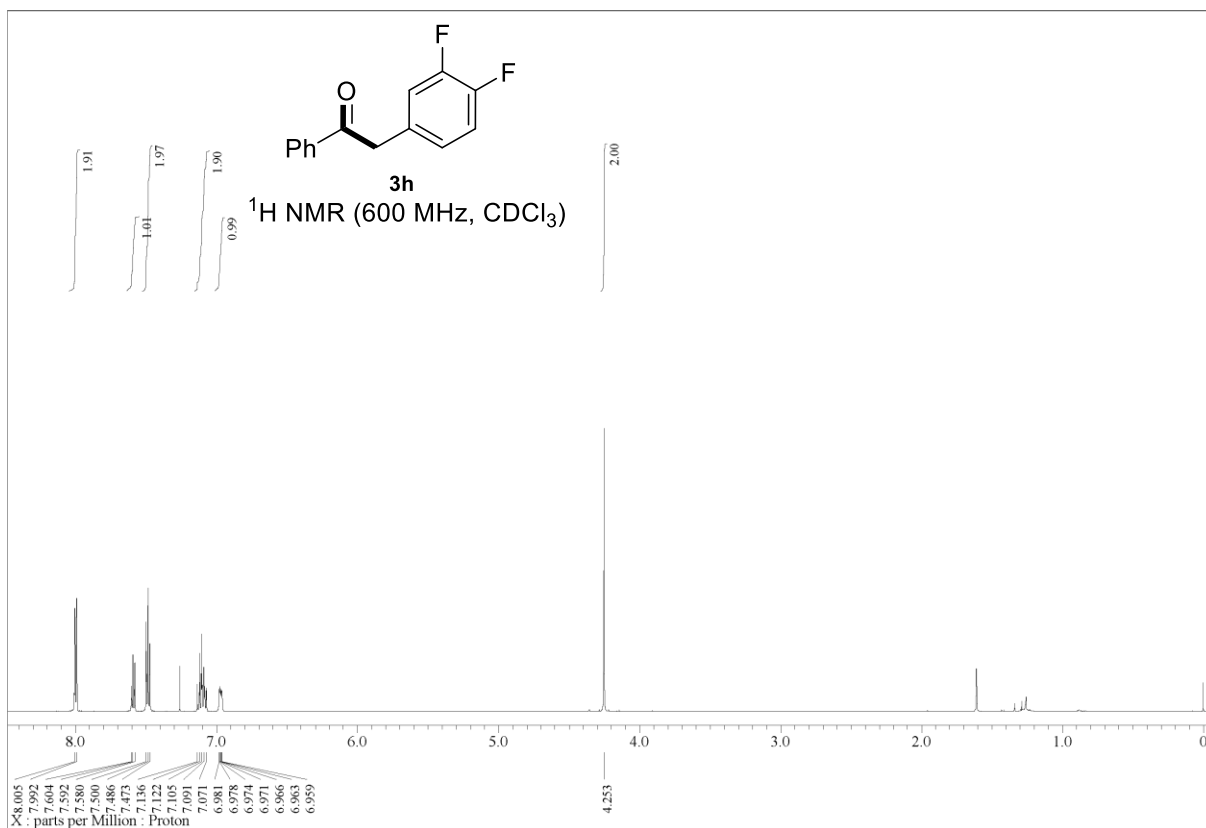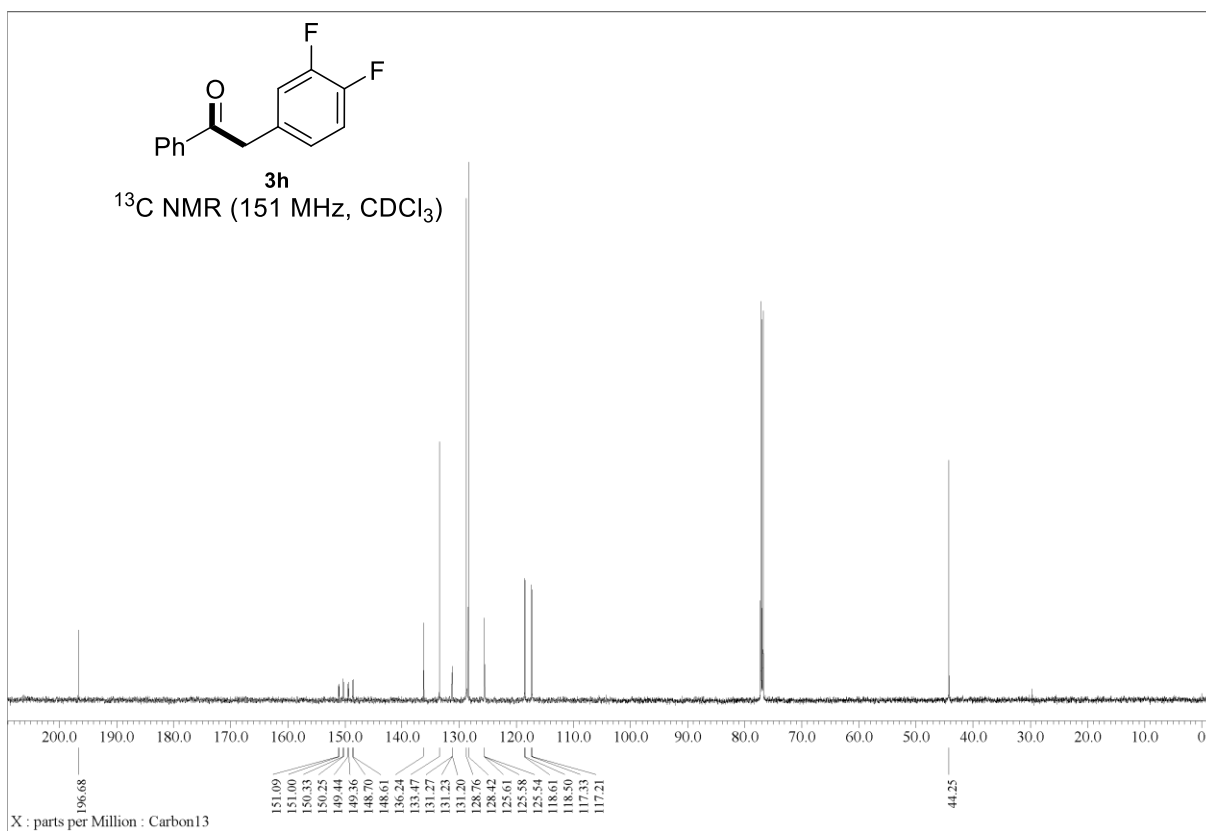

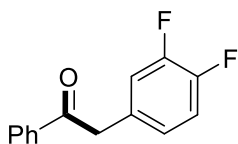

**3h**

$^{19}\text{F}$  NMR (564 MHz,  $\text{CDCl}_3$ )

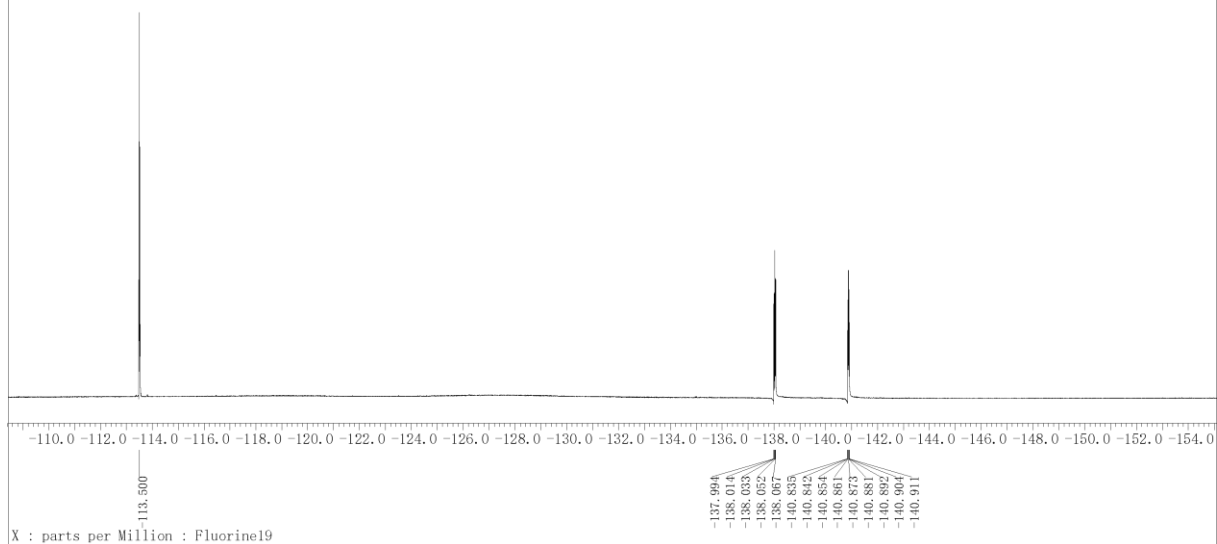

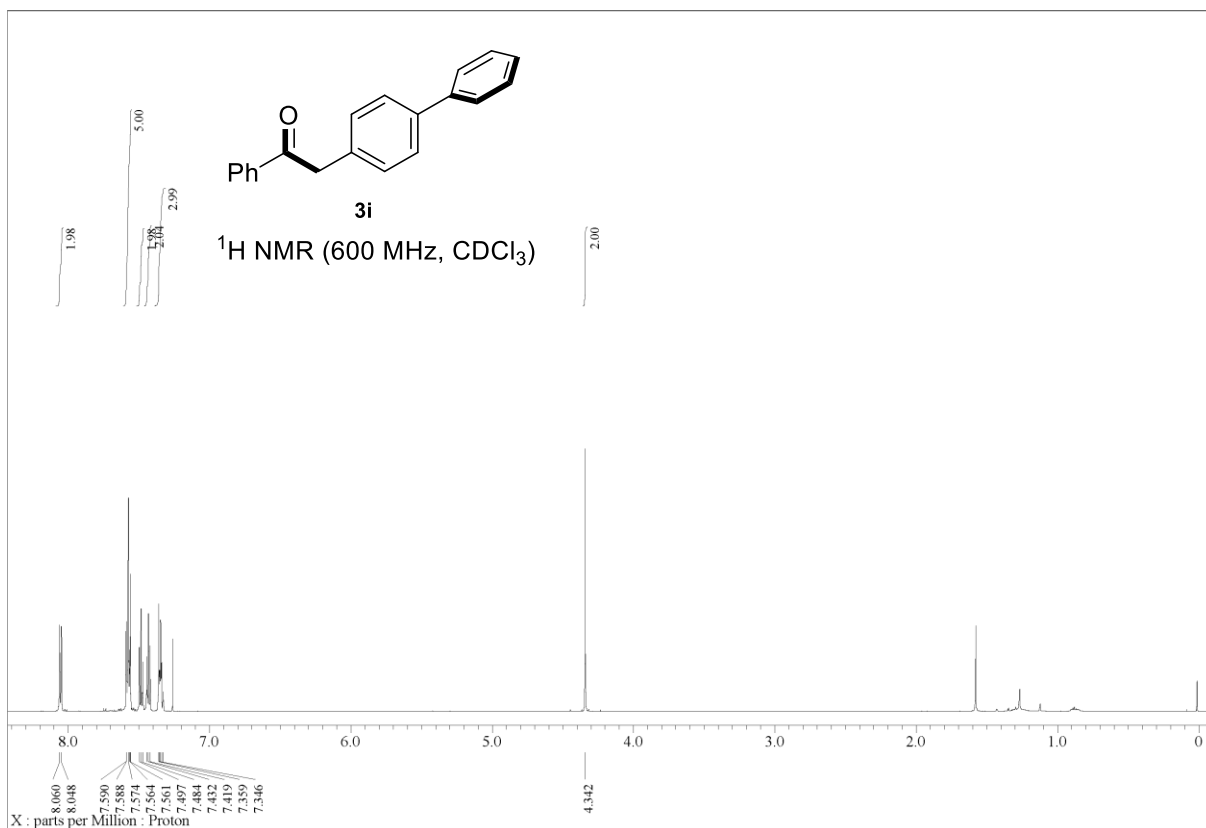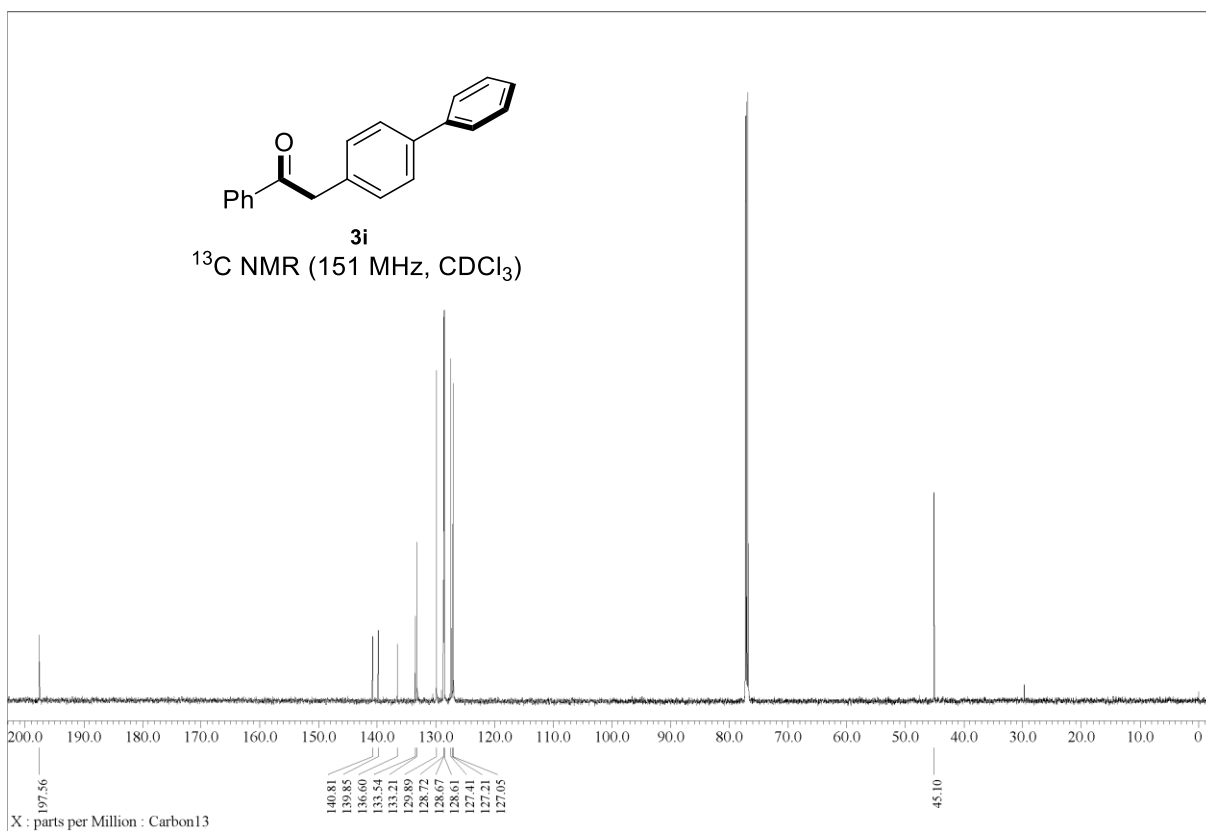

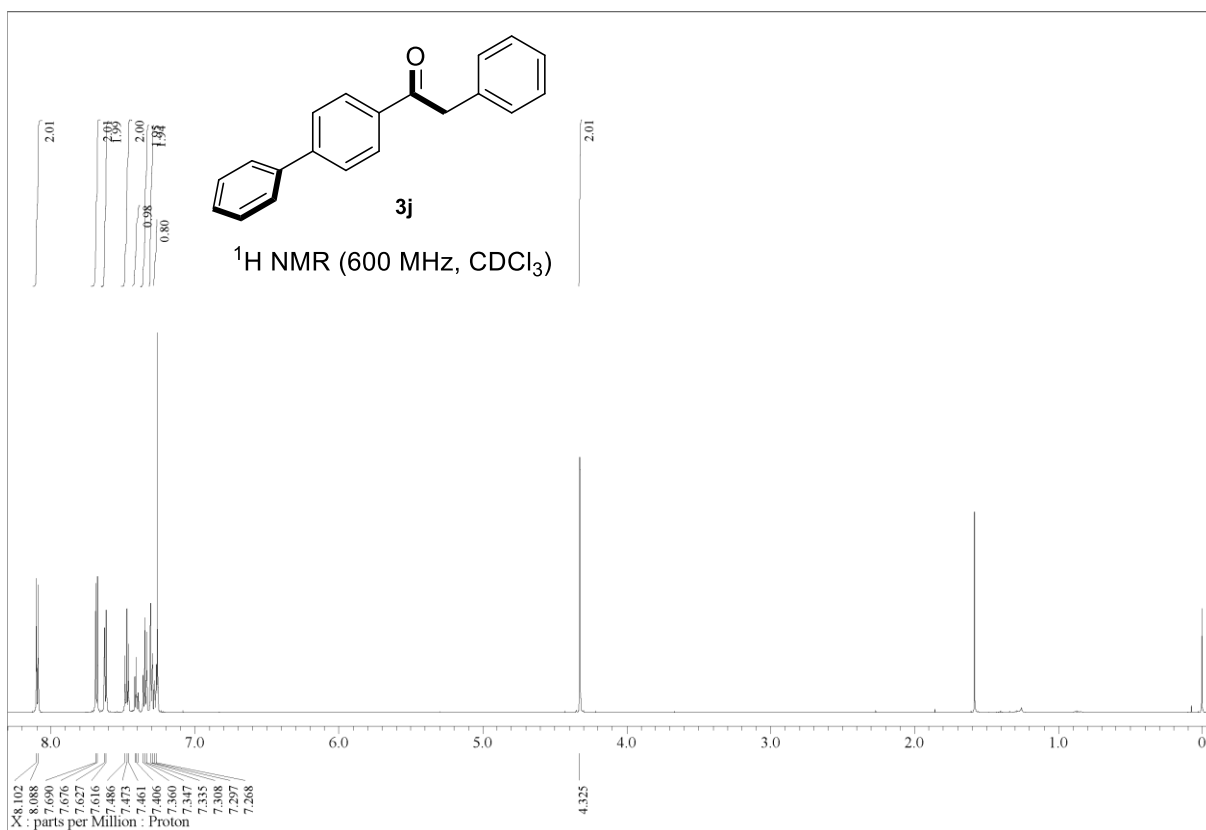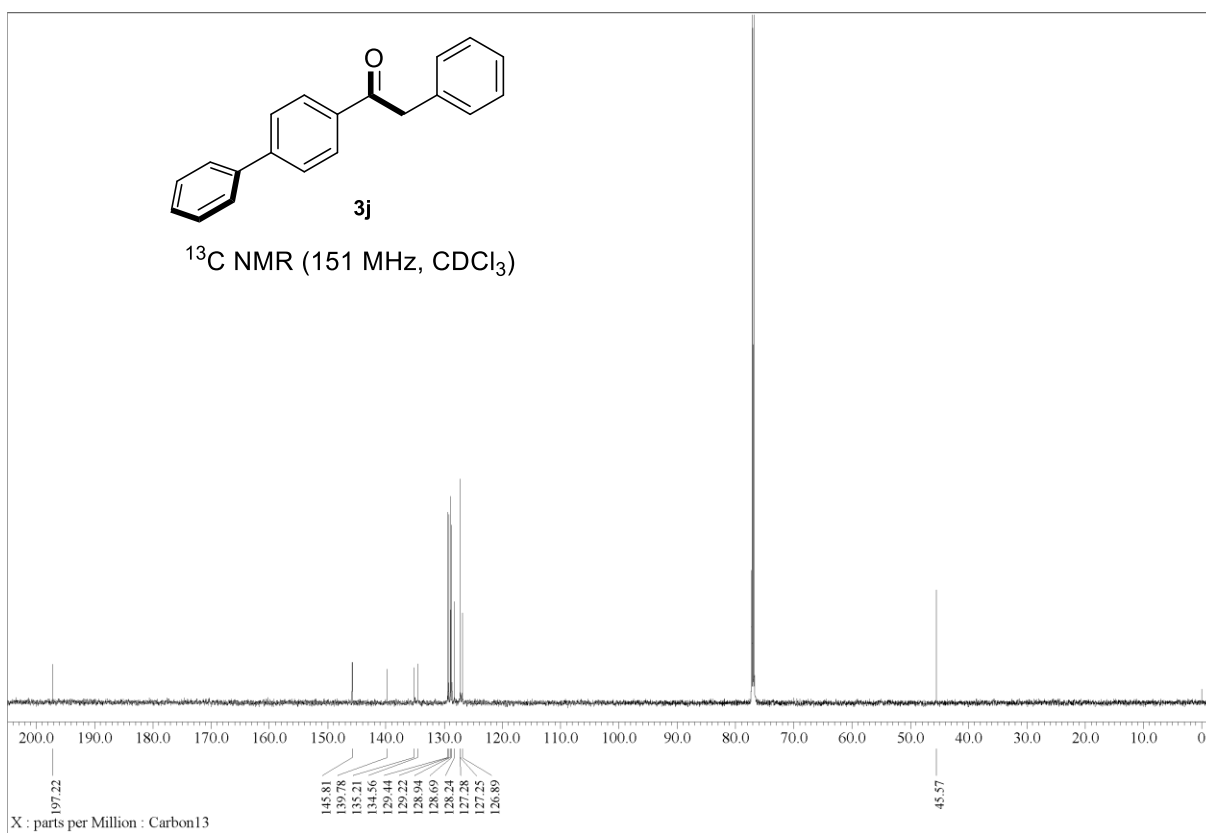

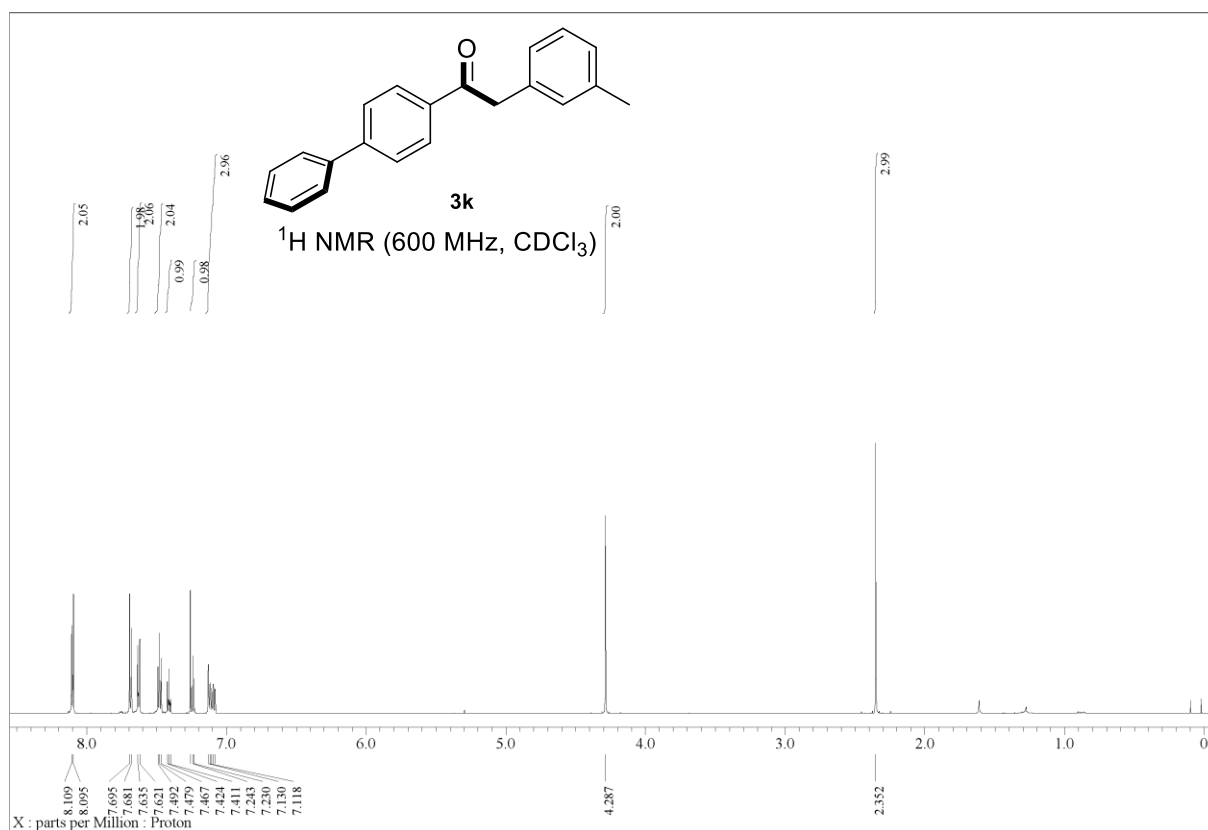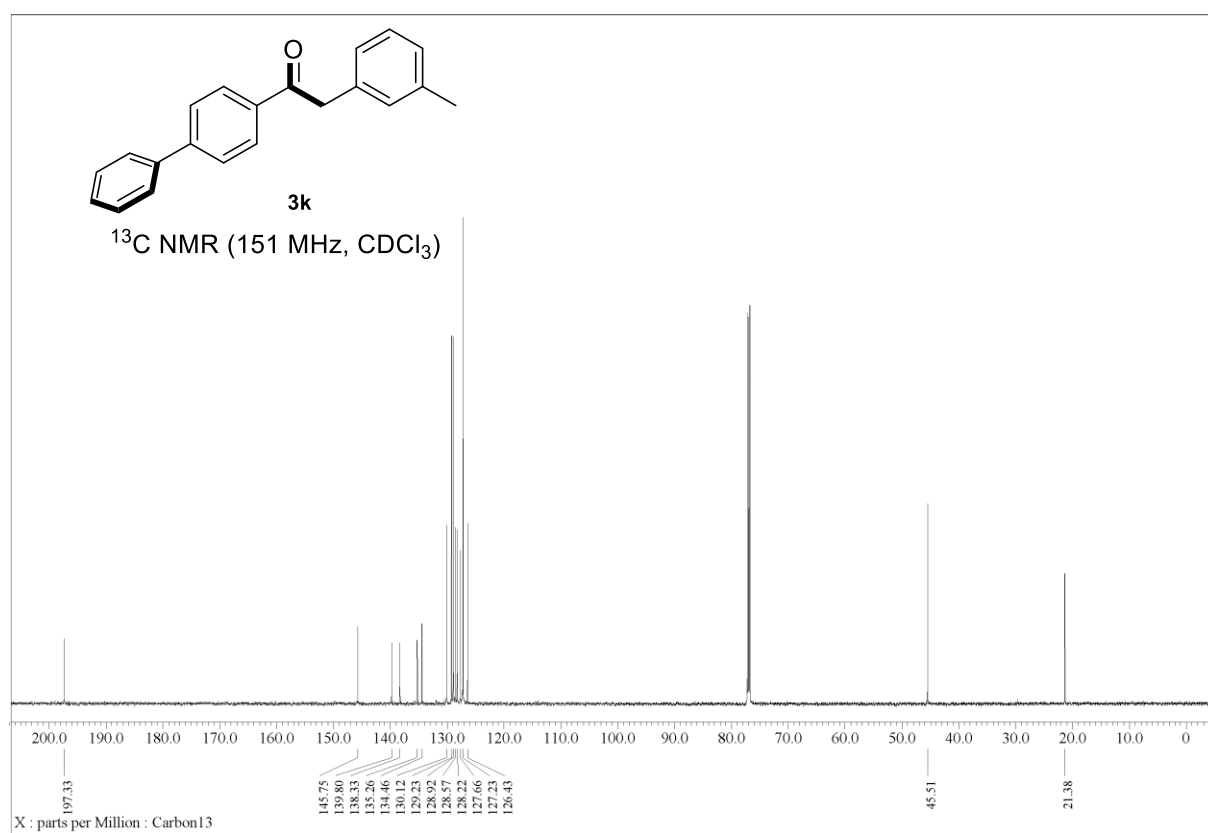

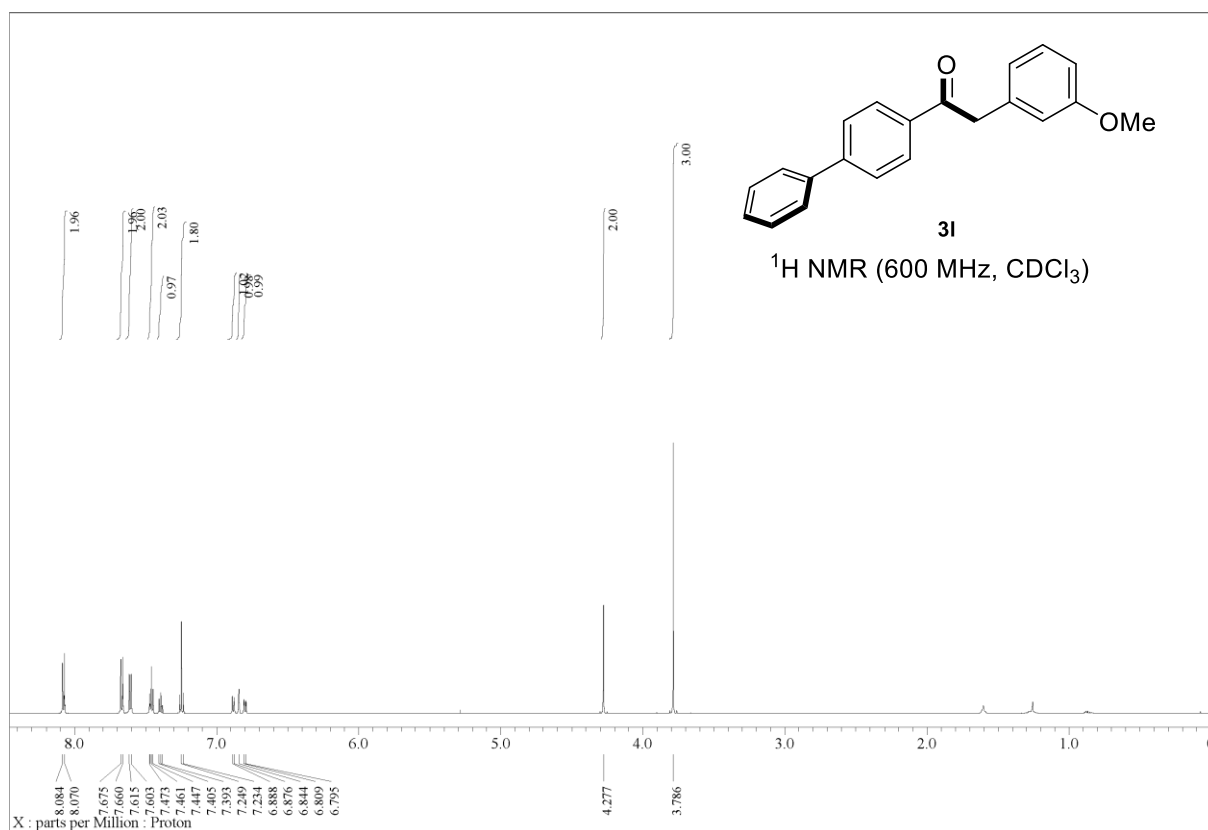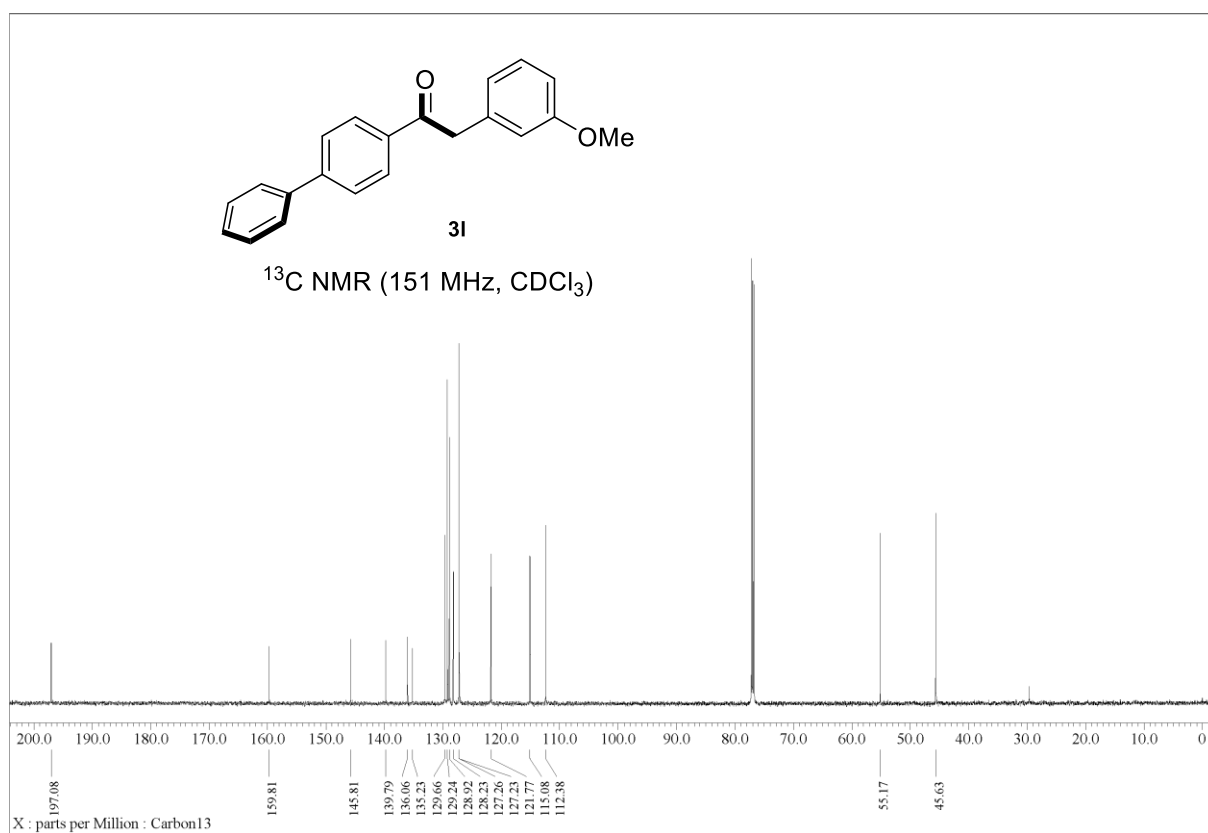

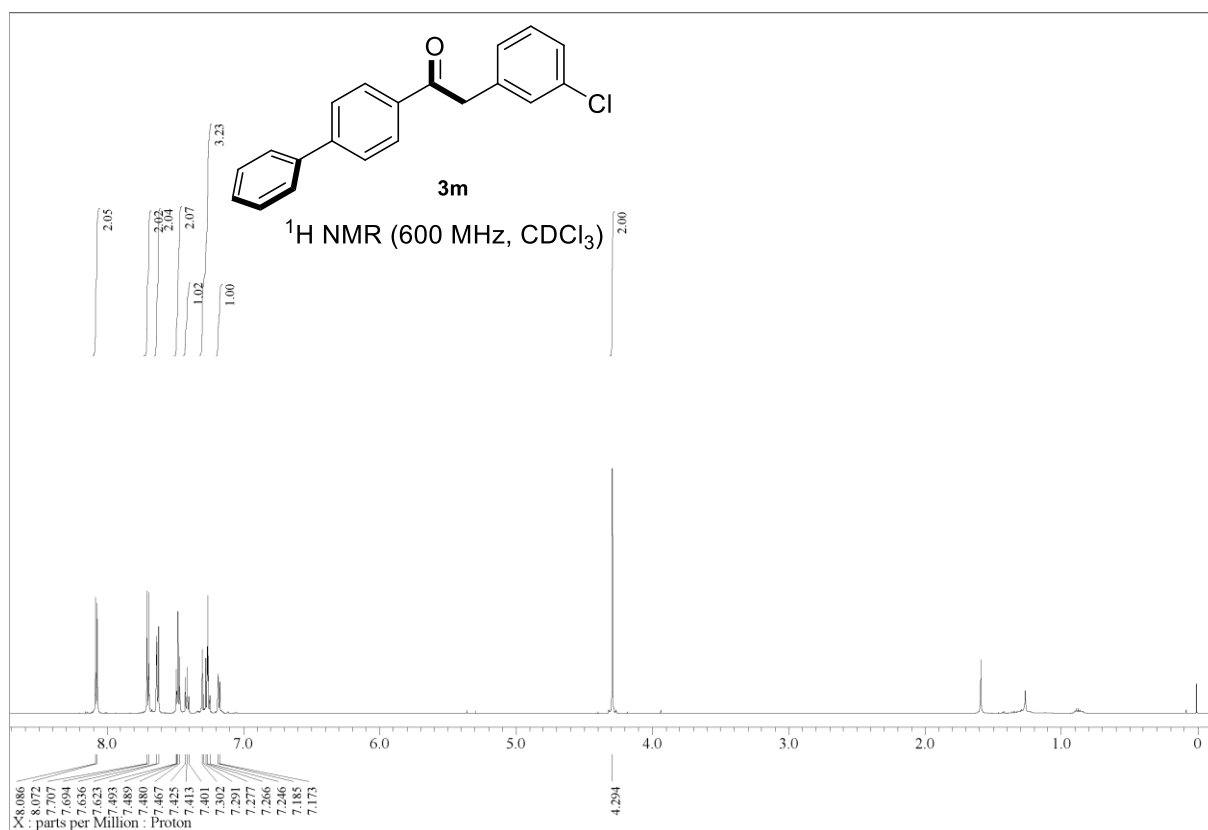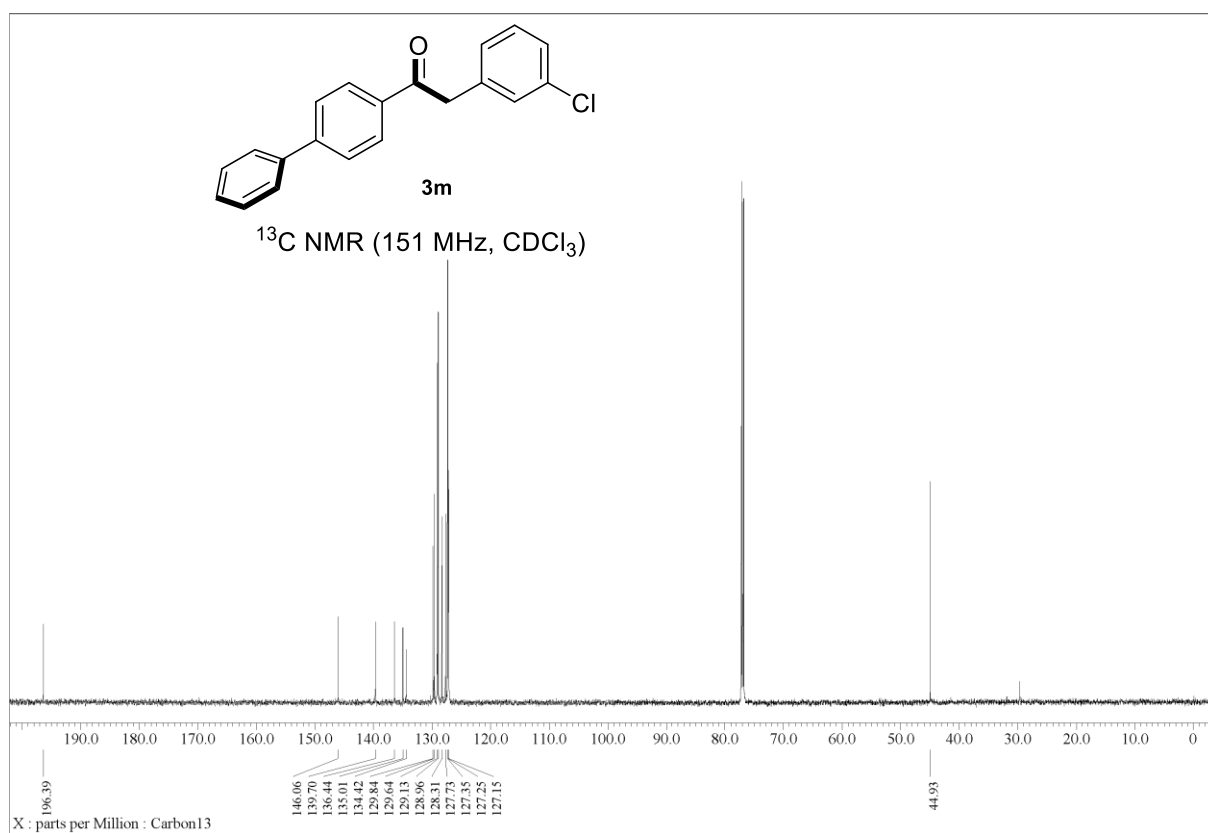

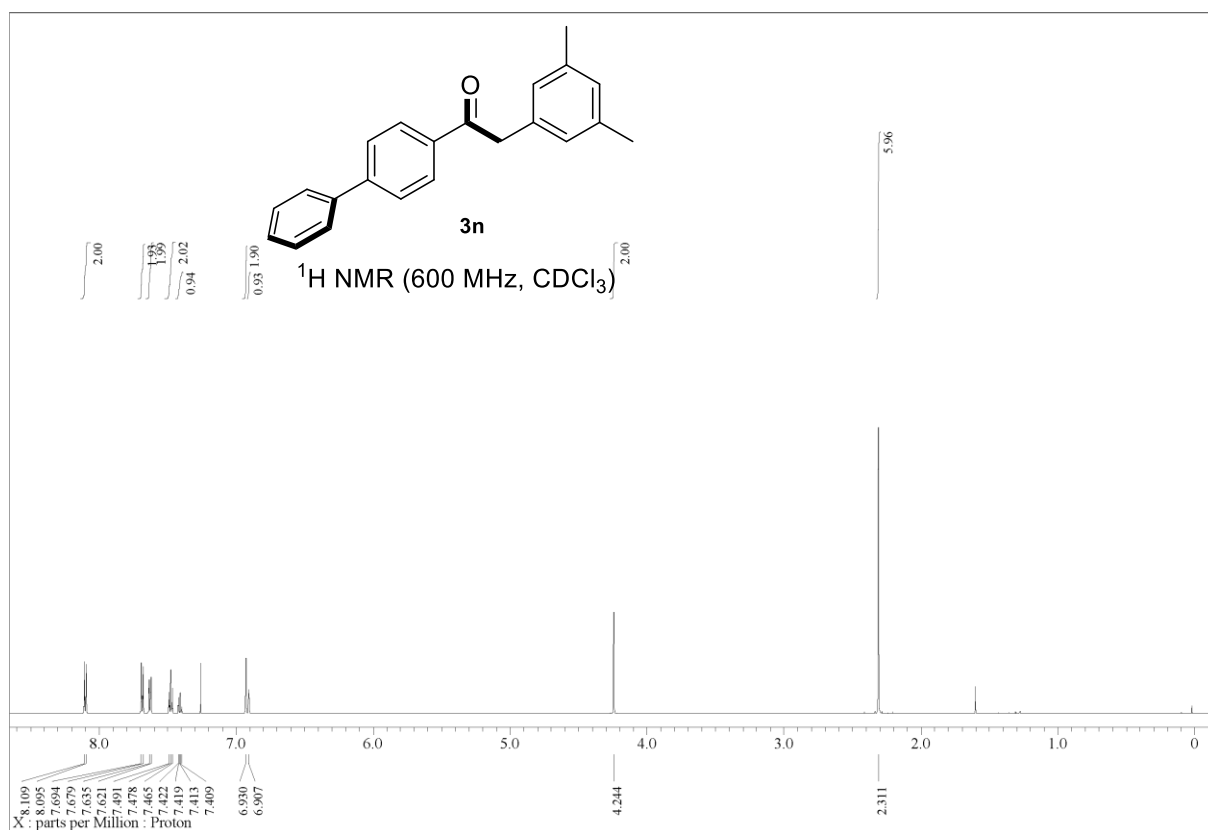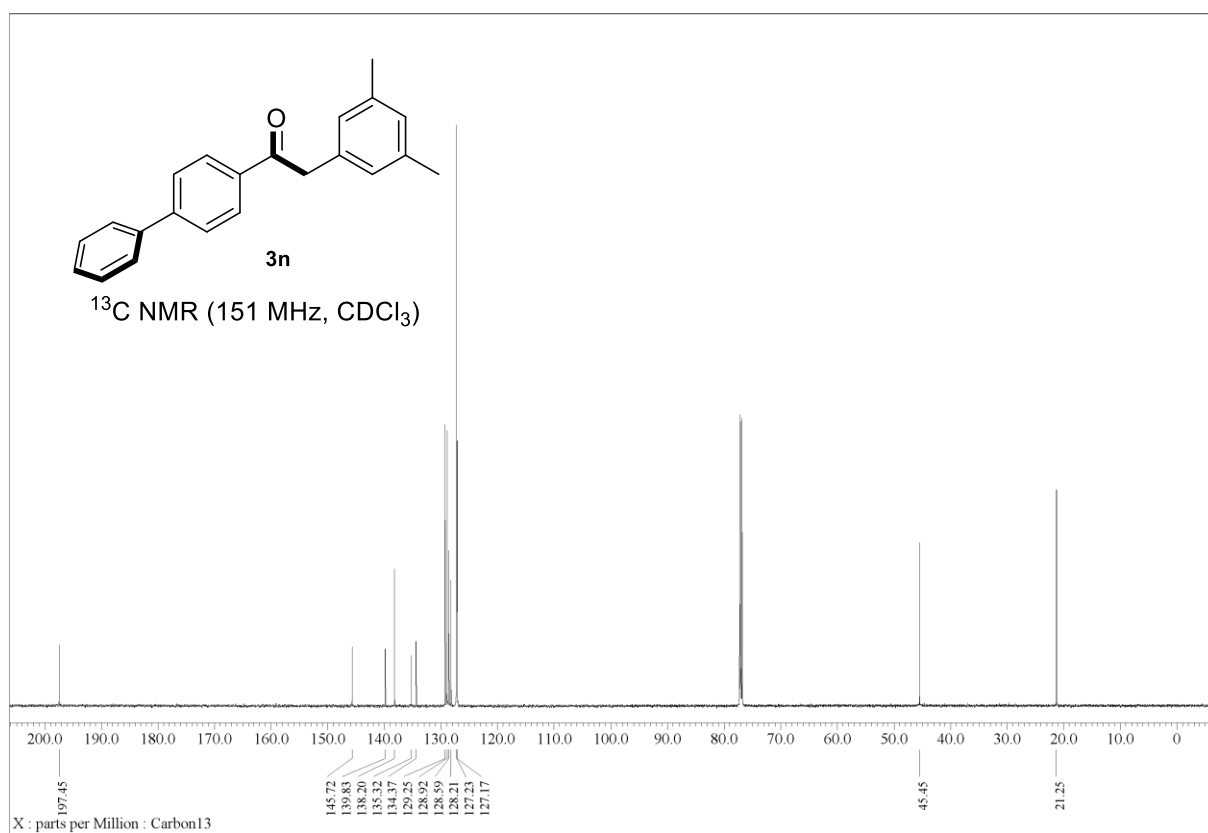



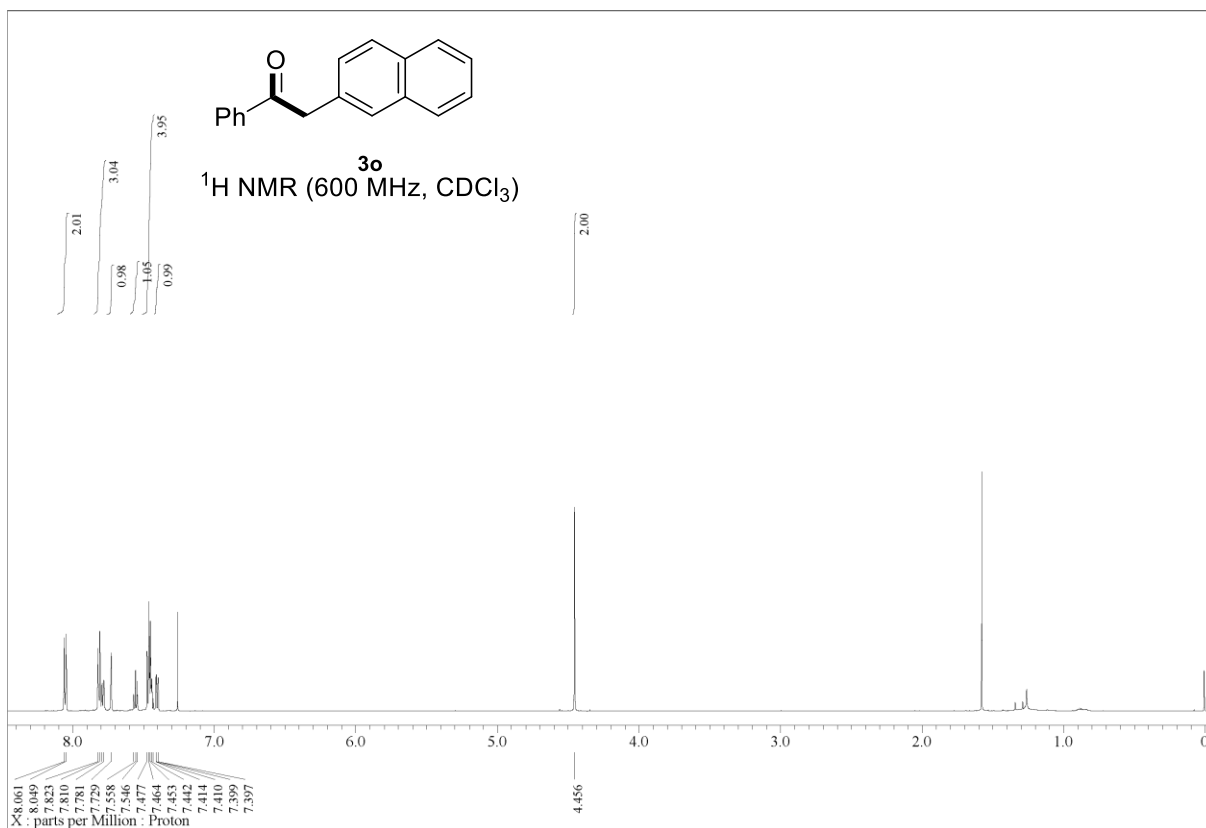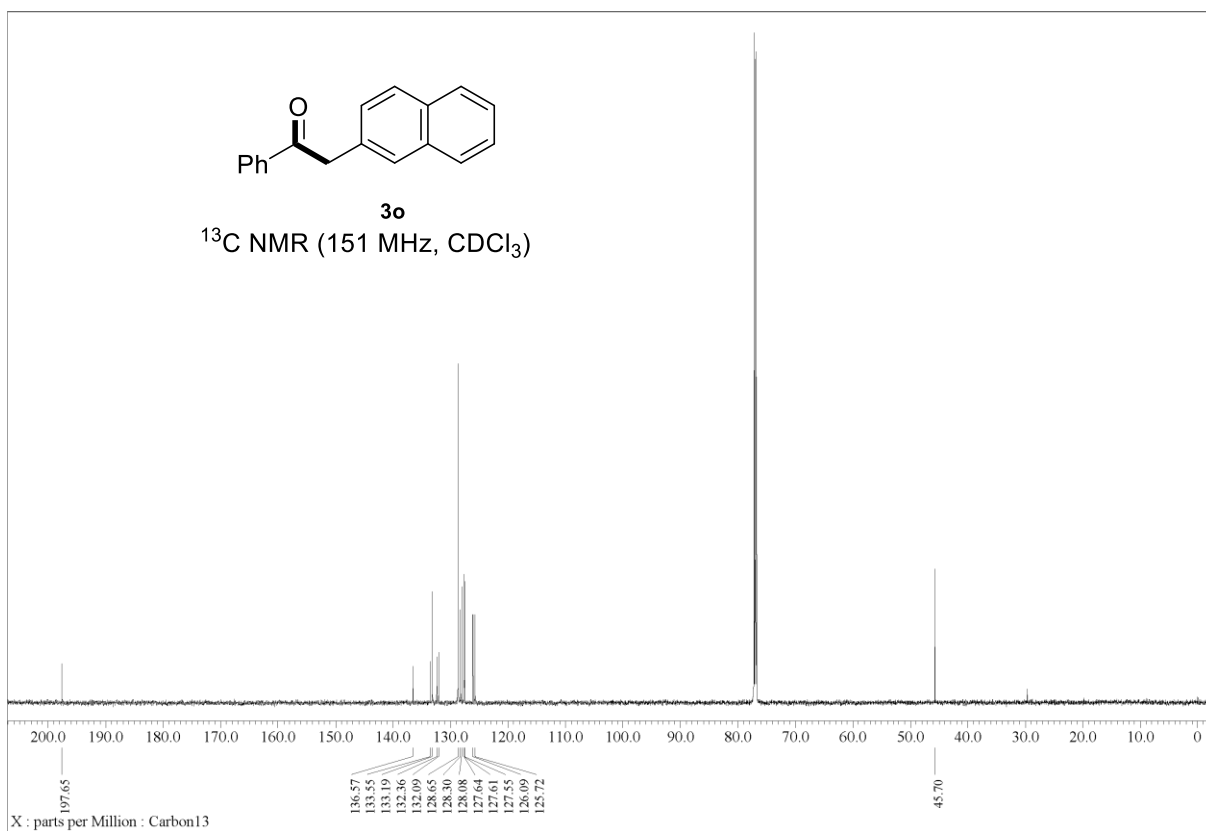

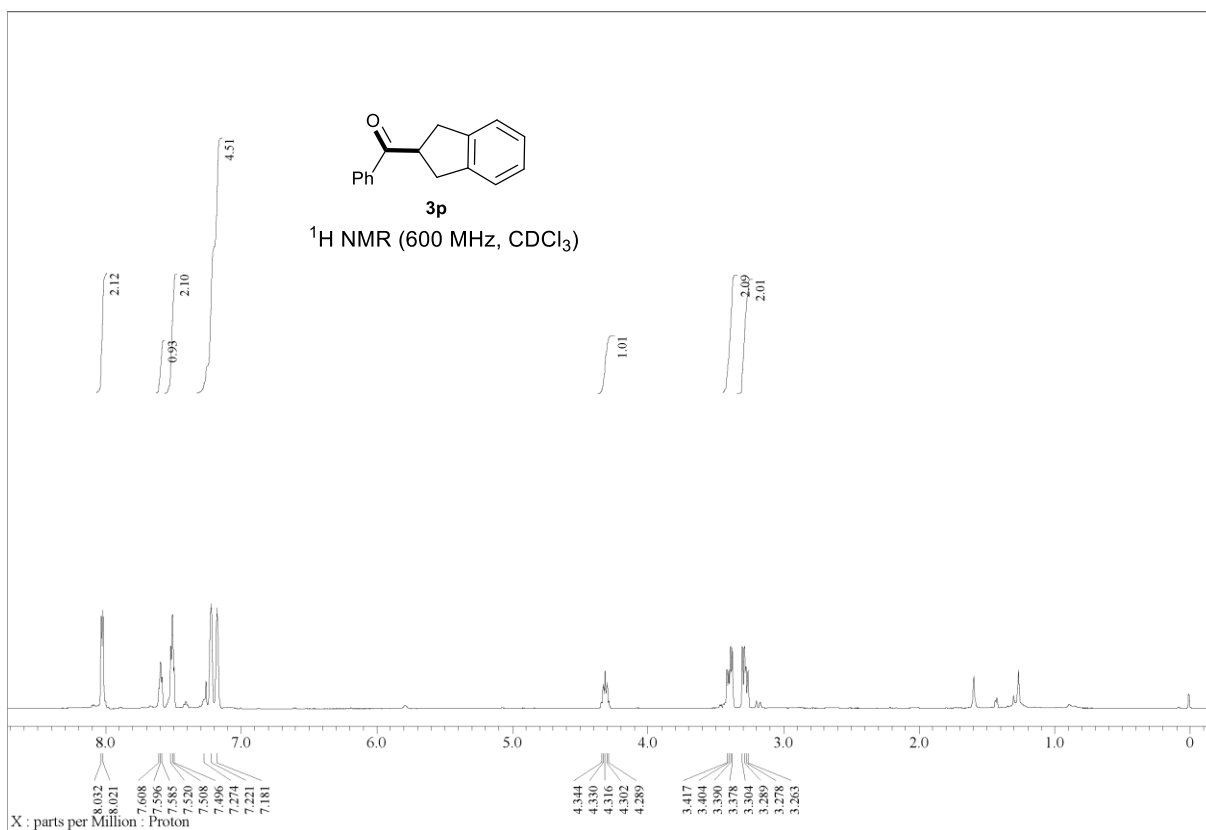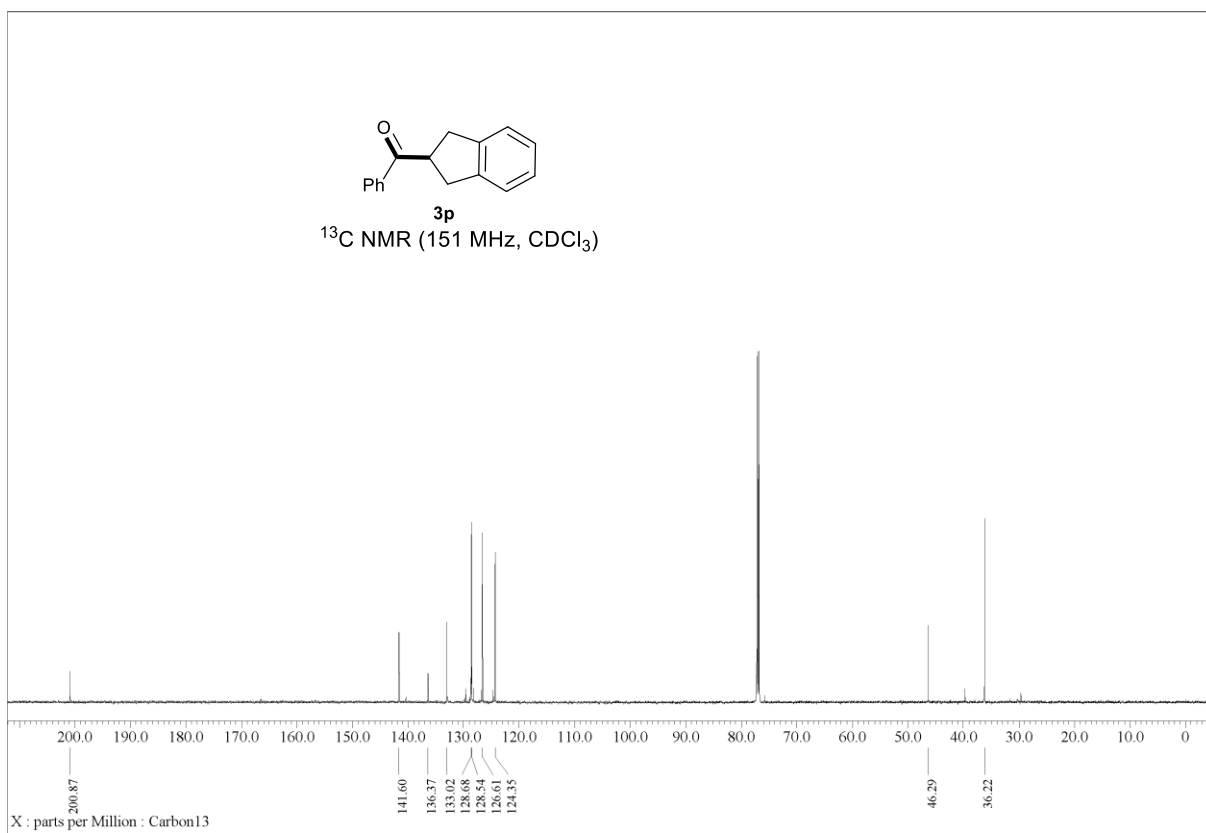

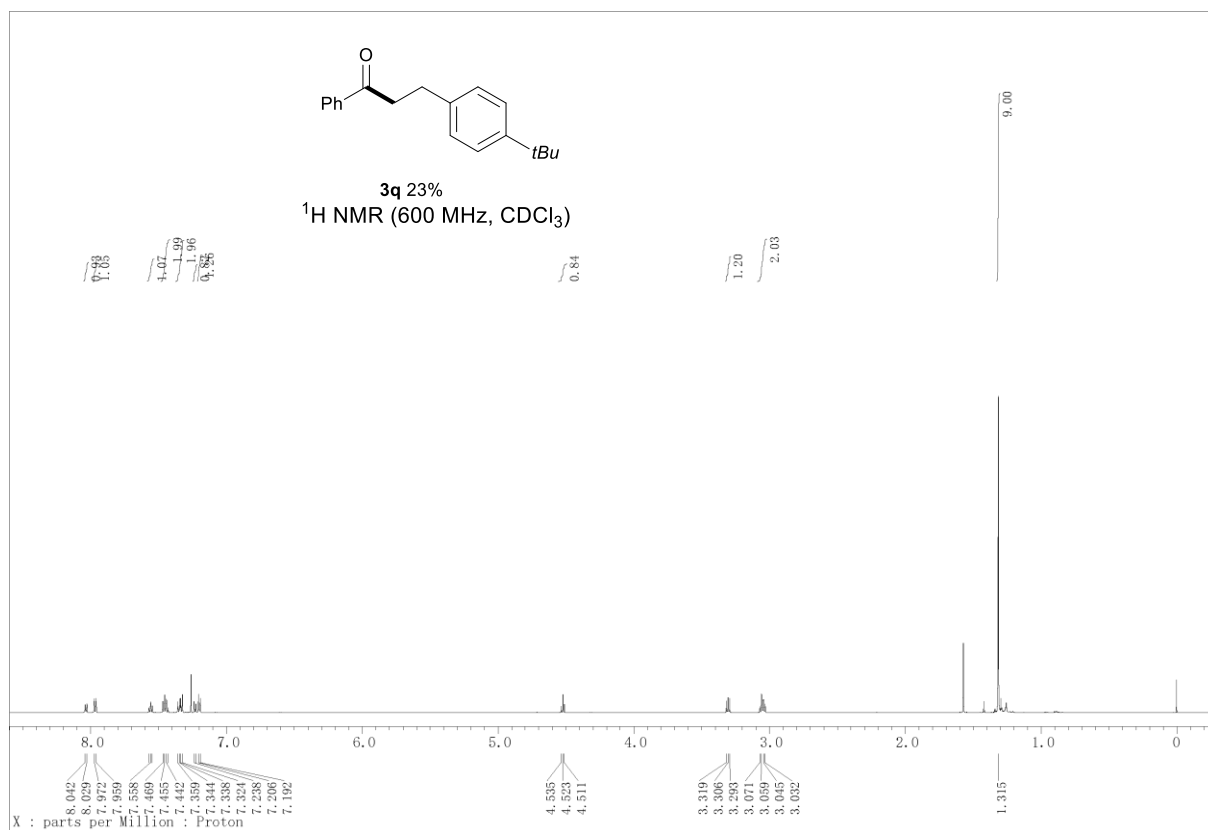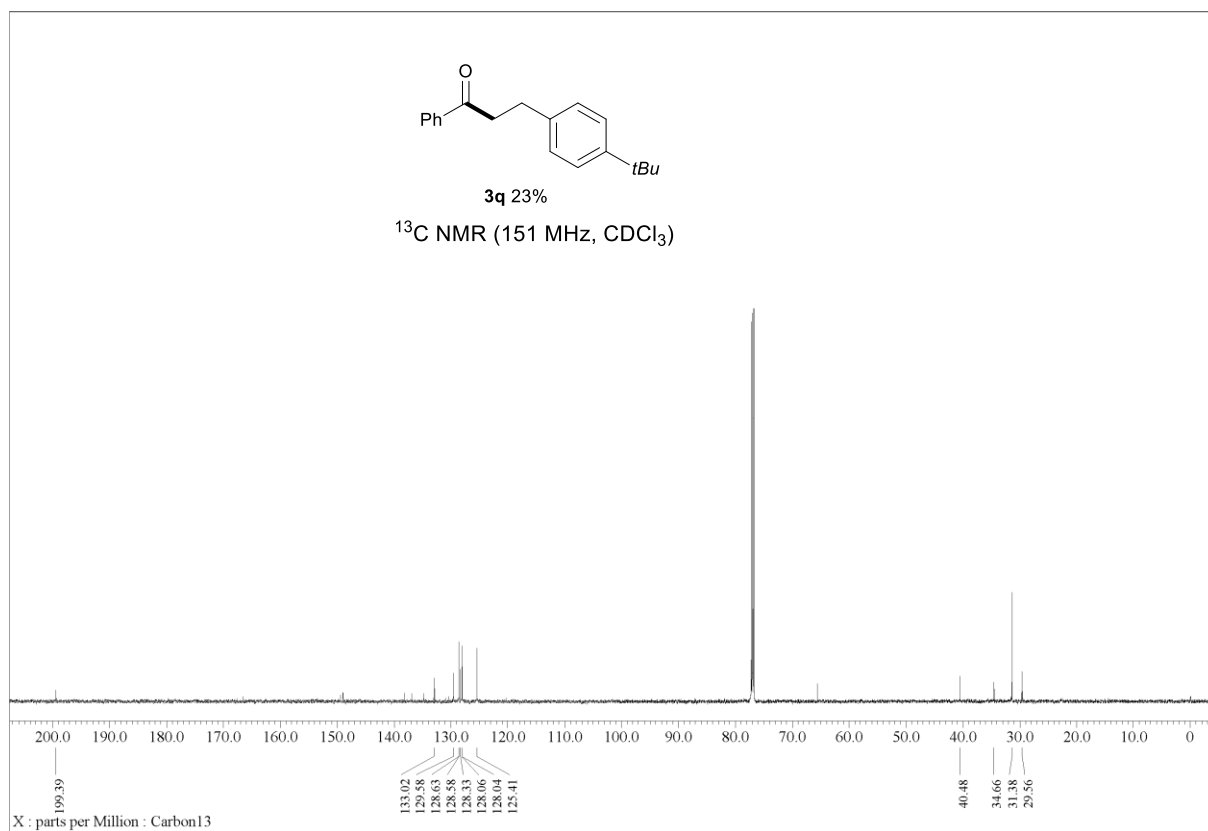

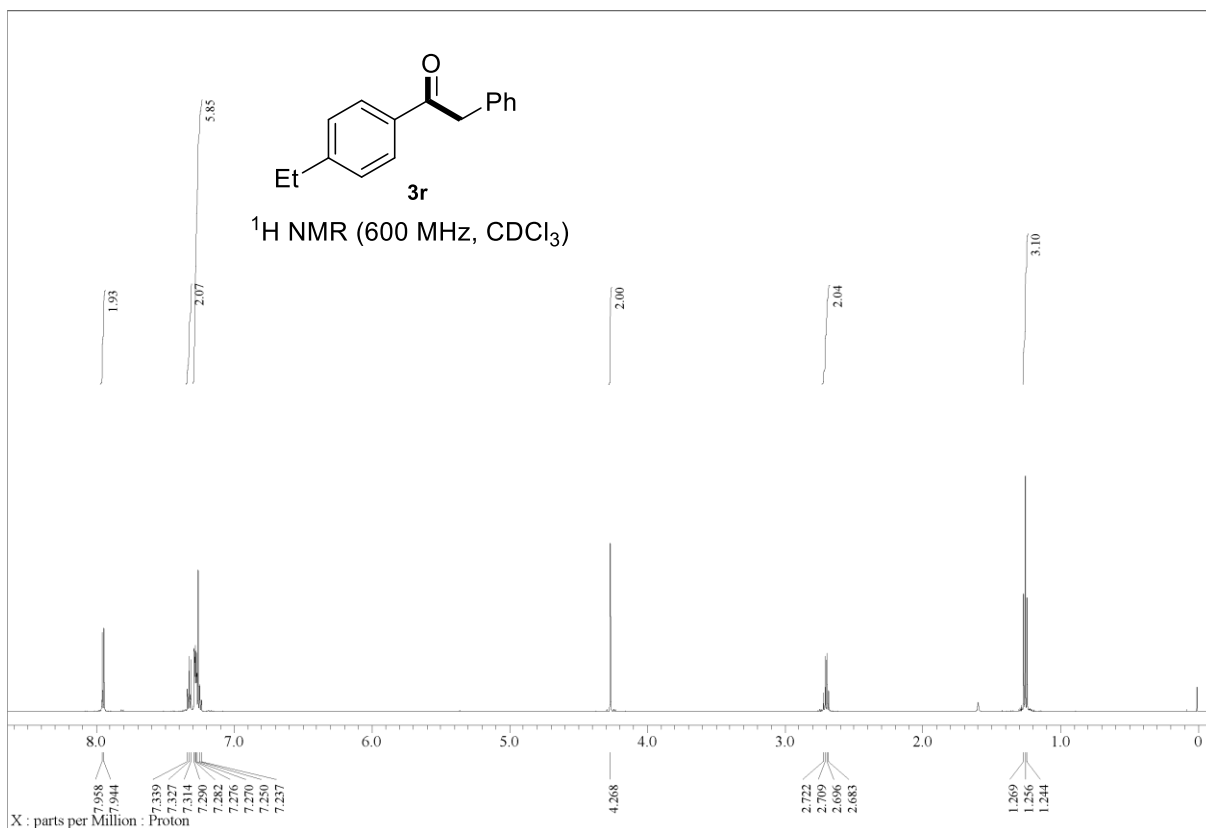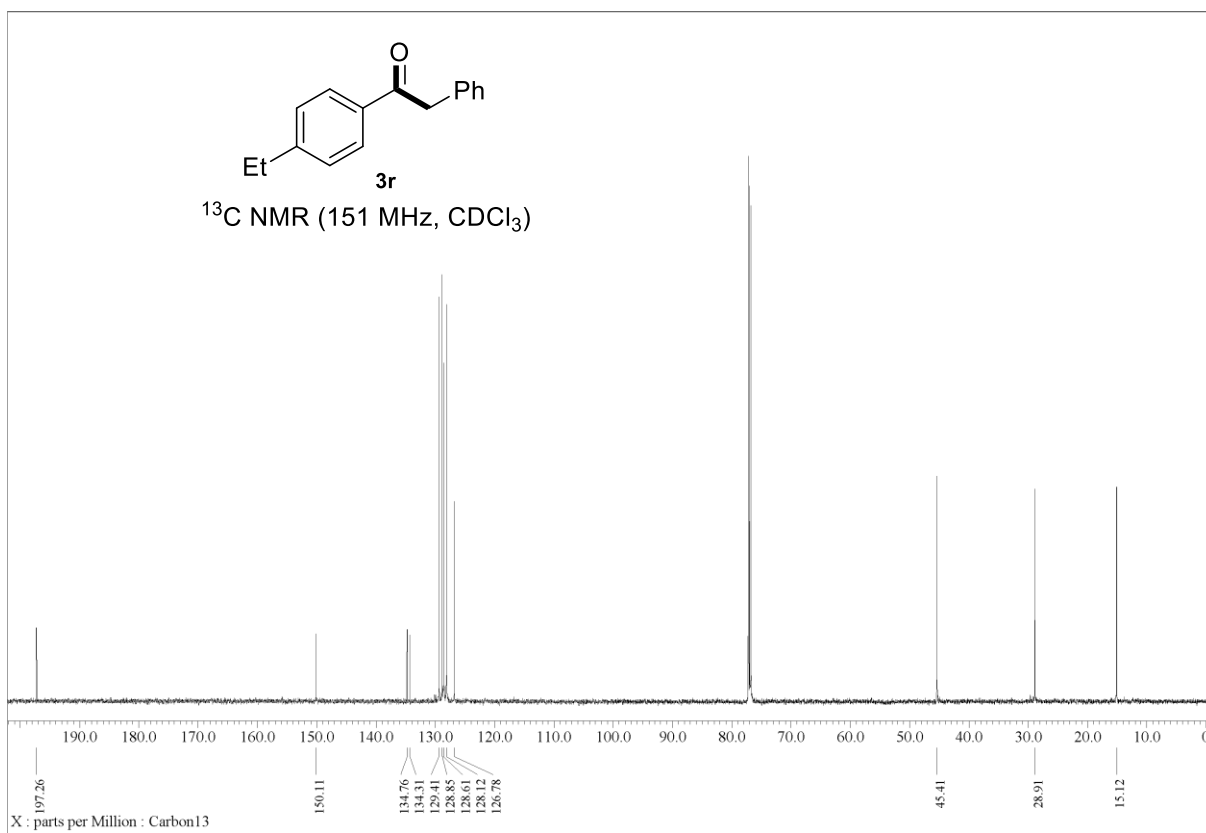

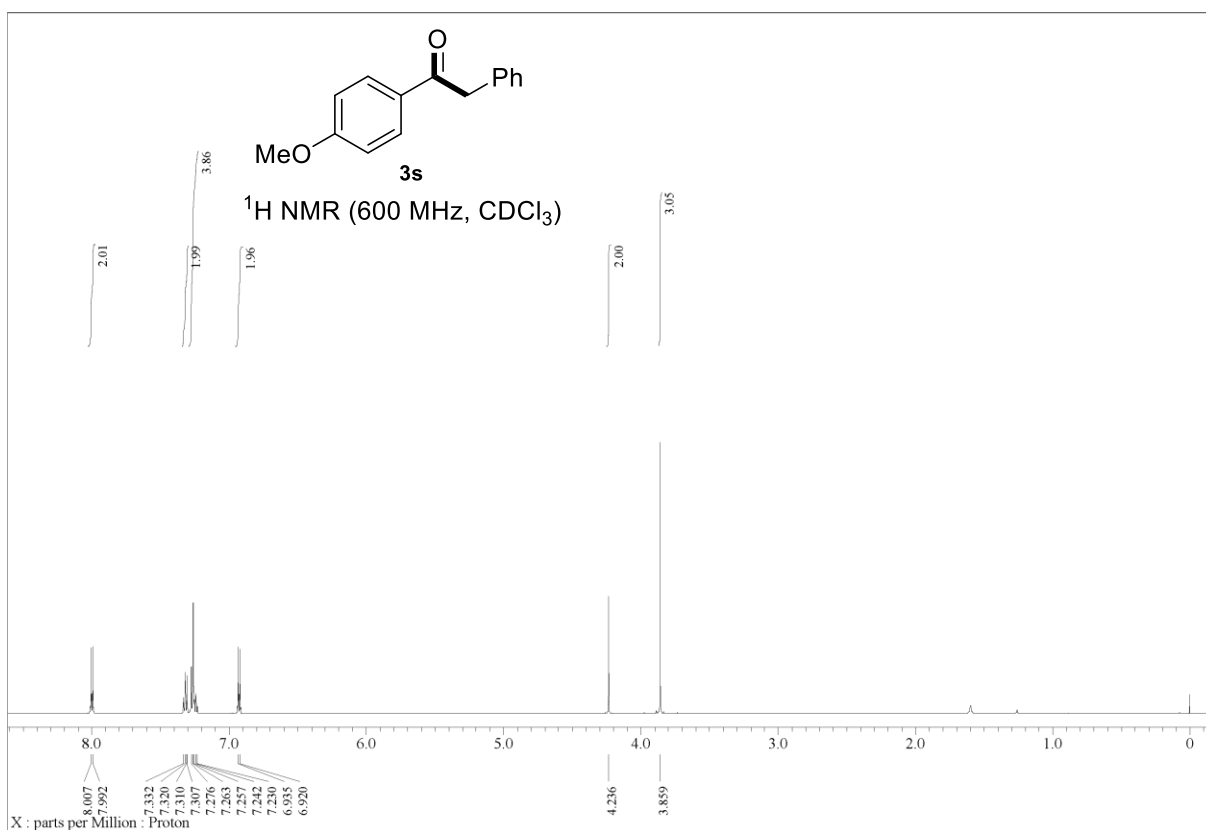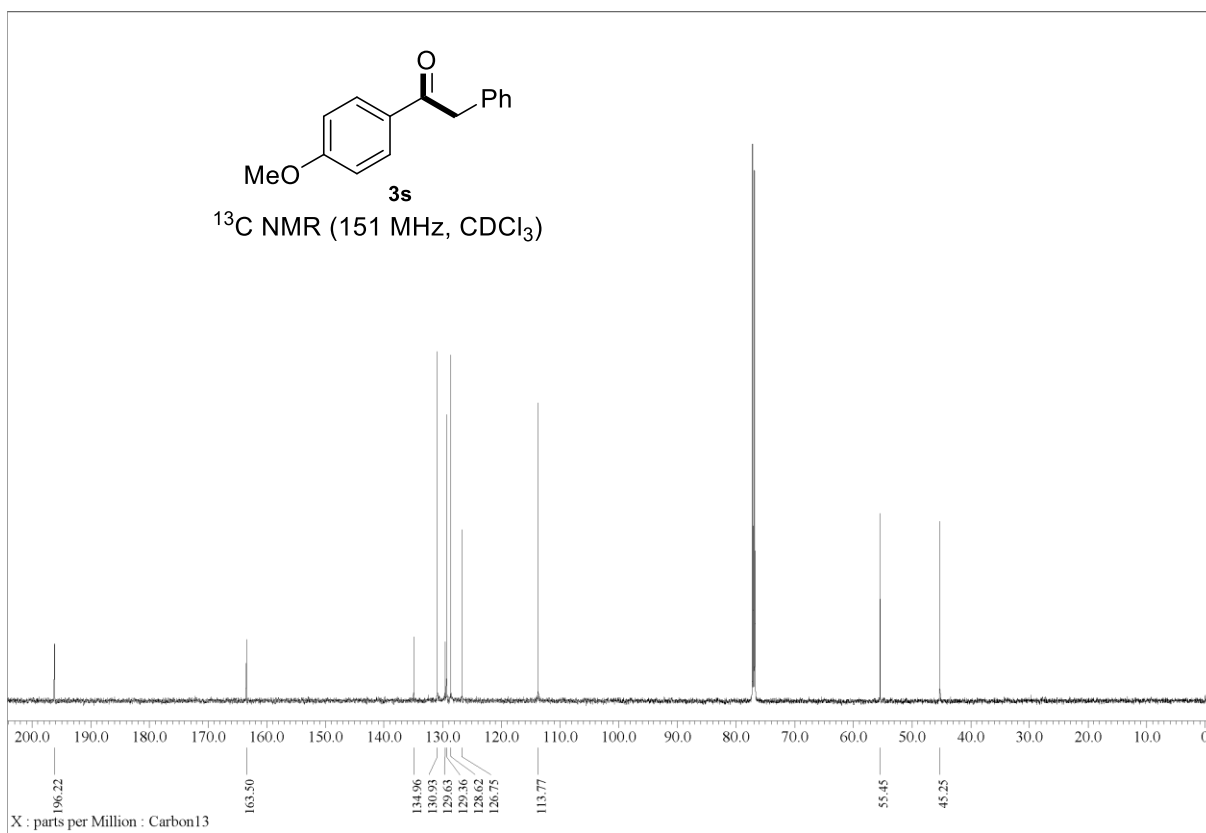

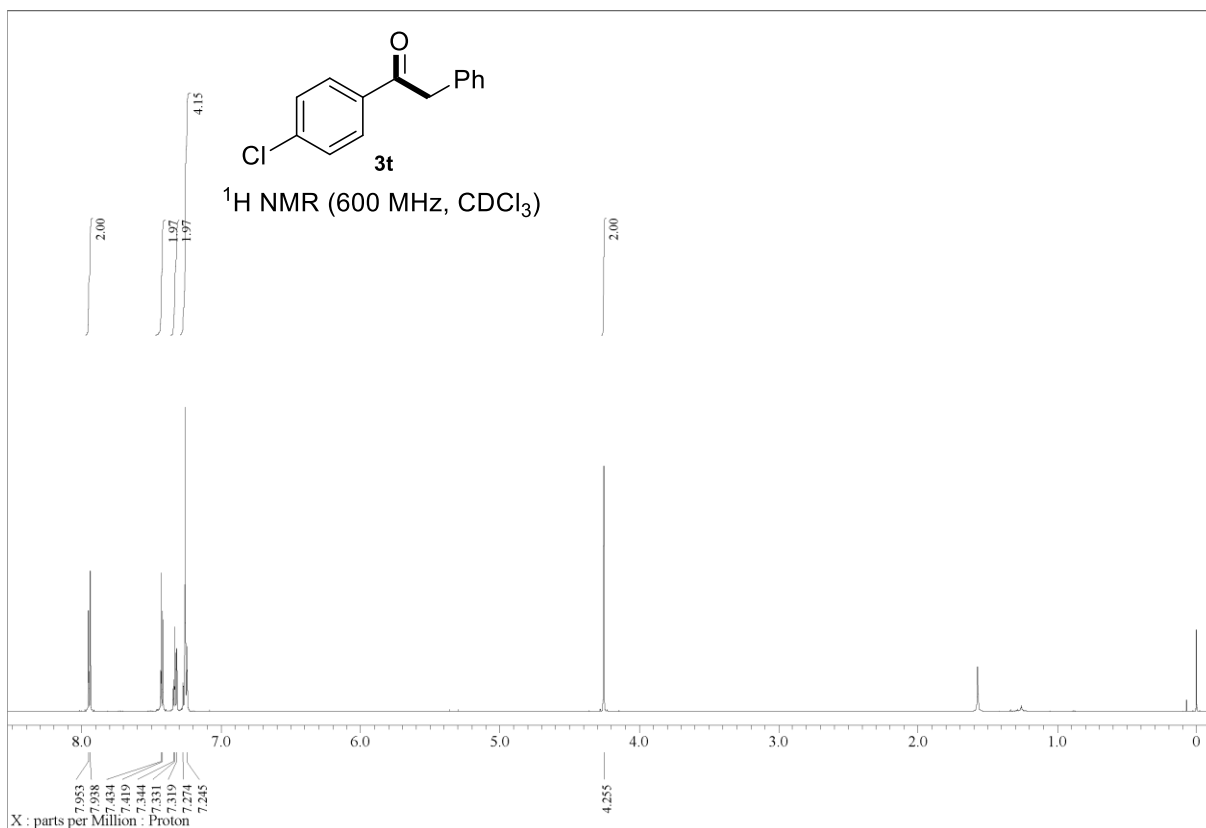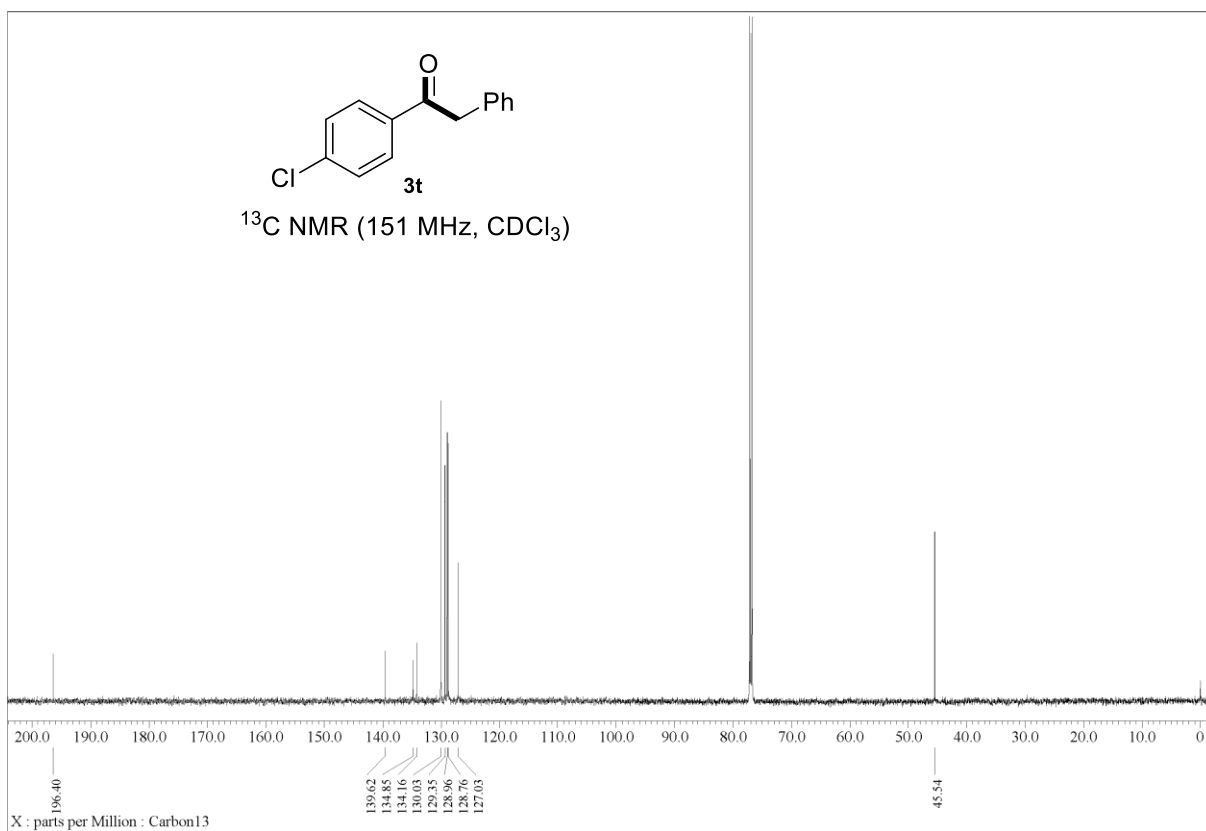

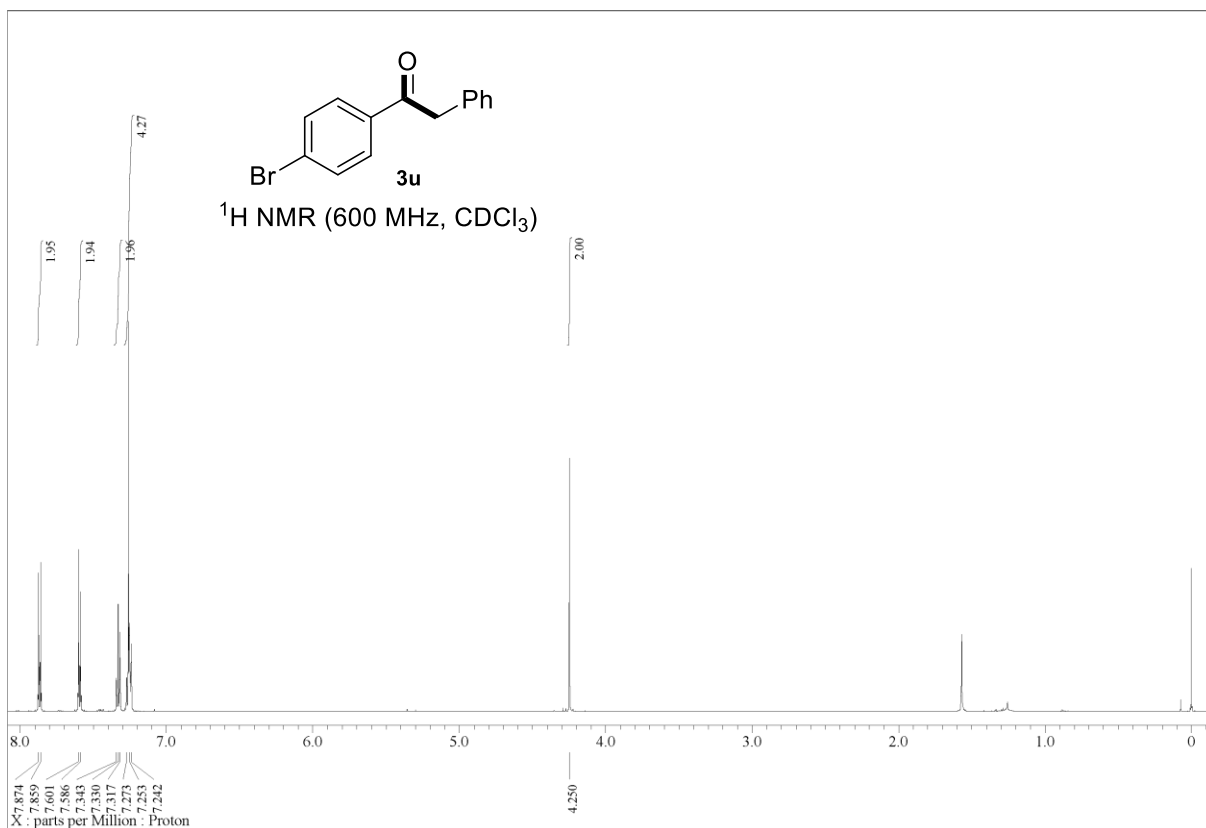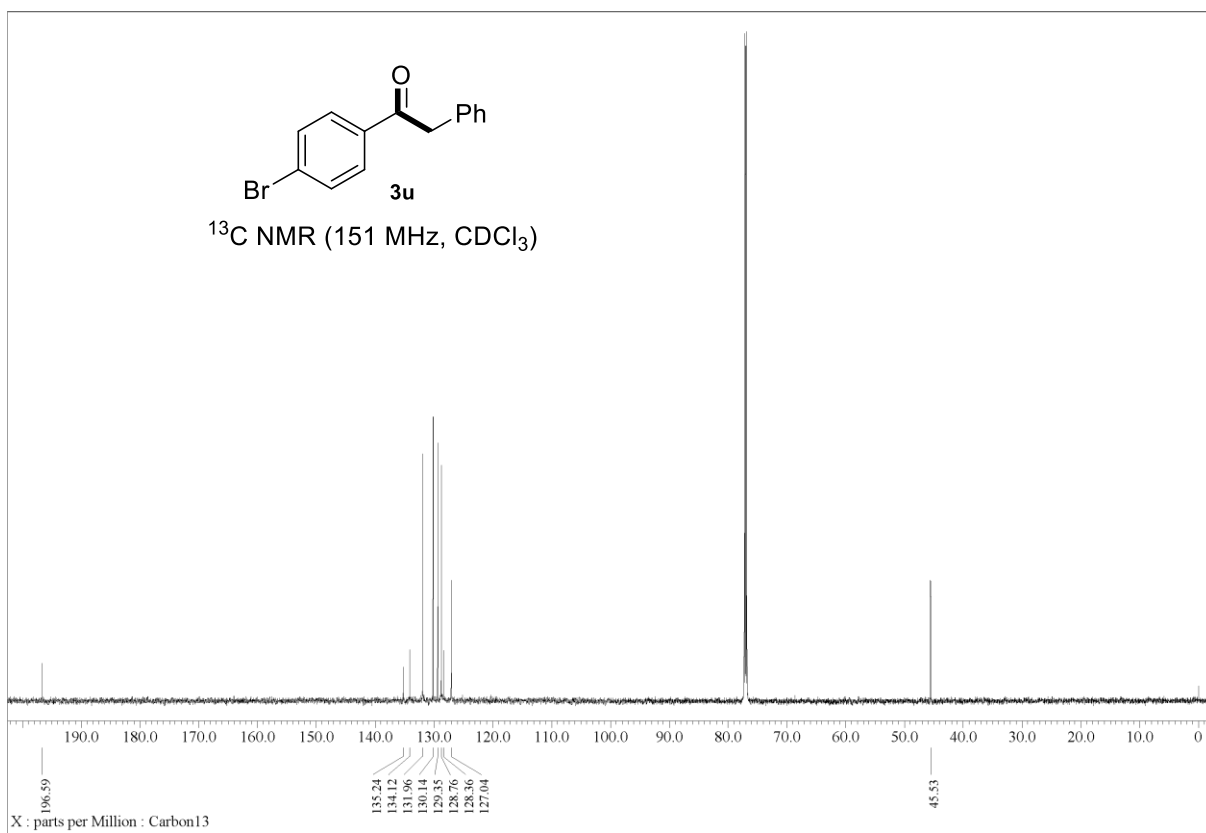

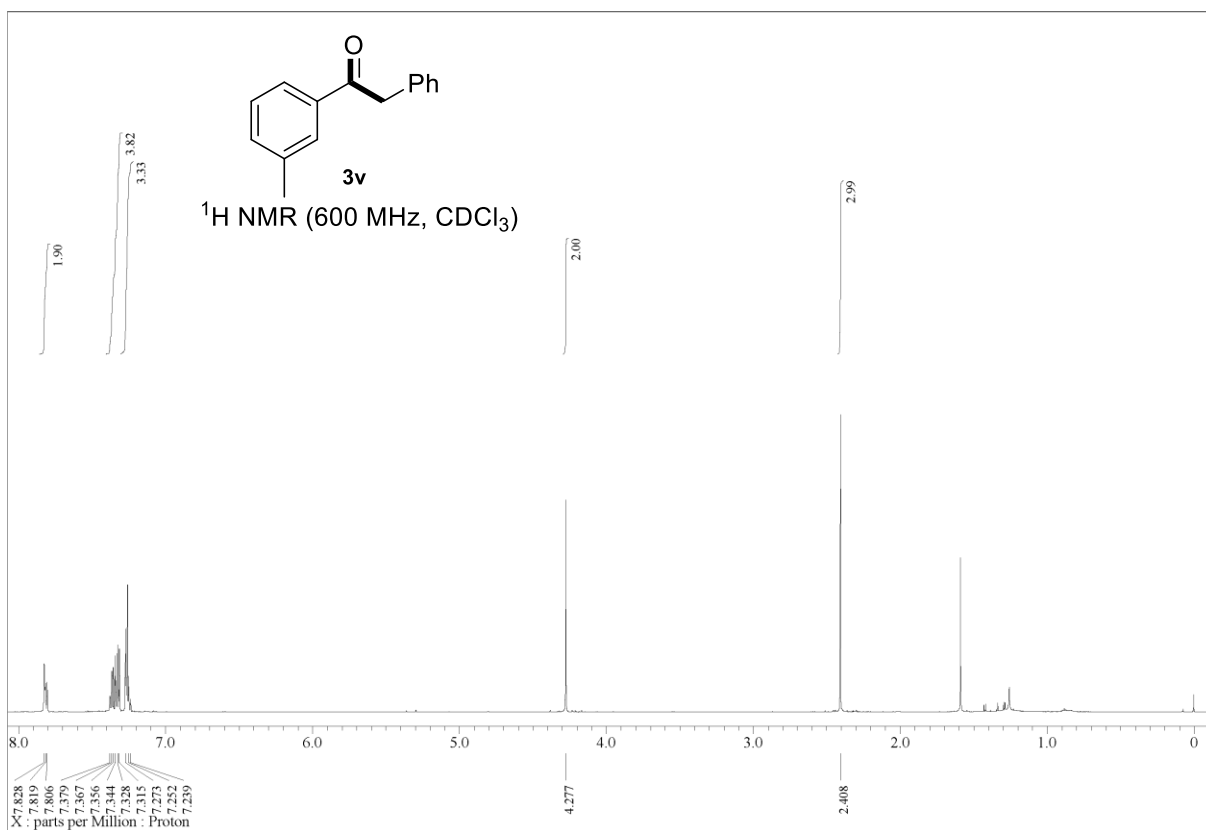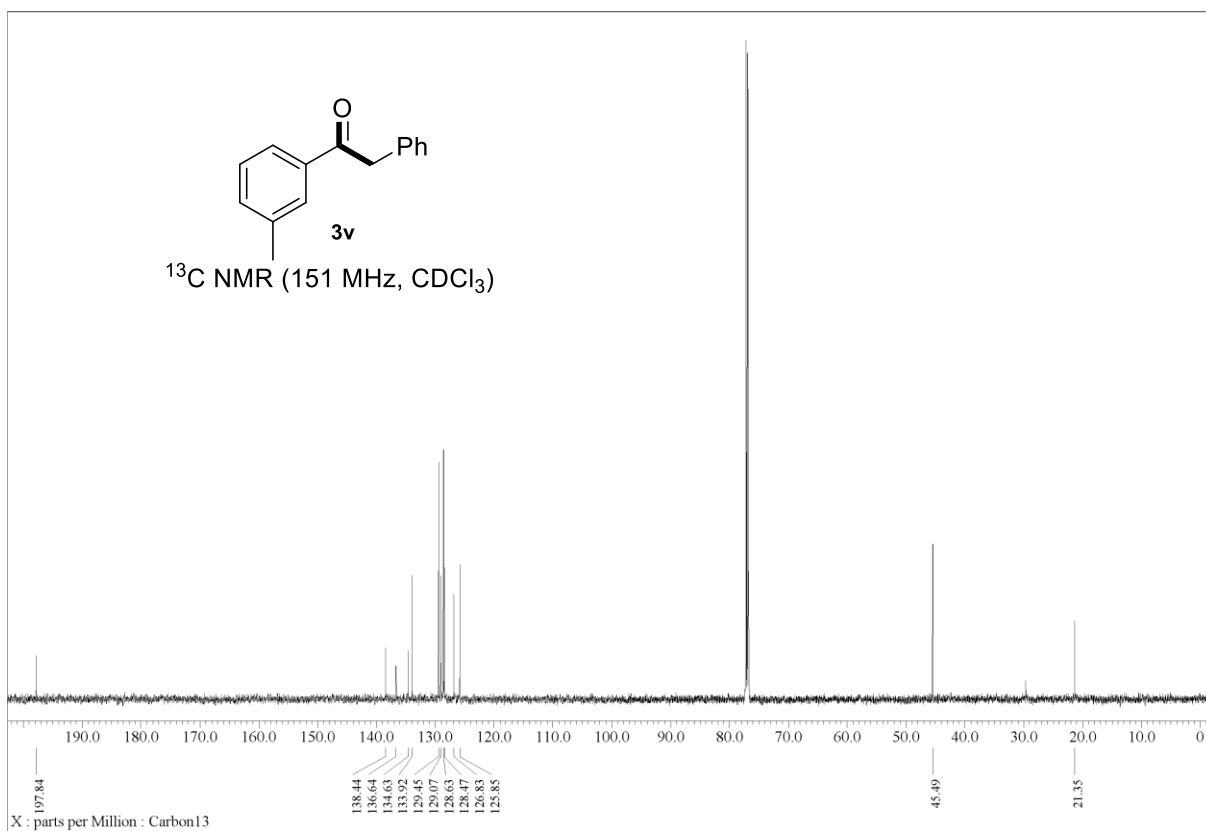



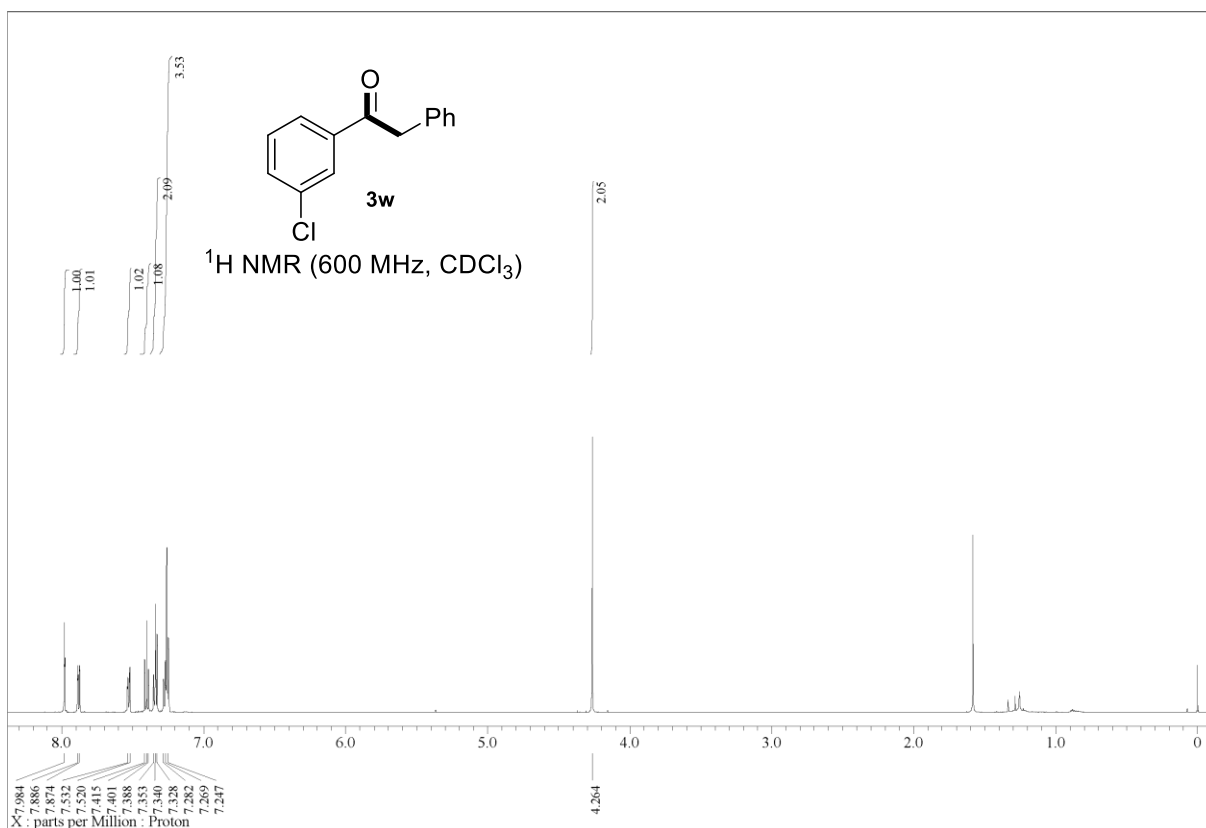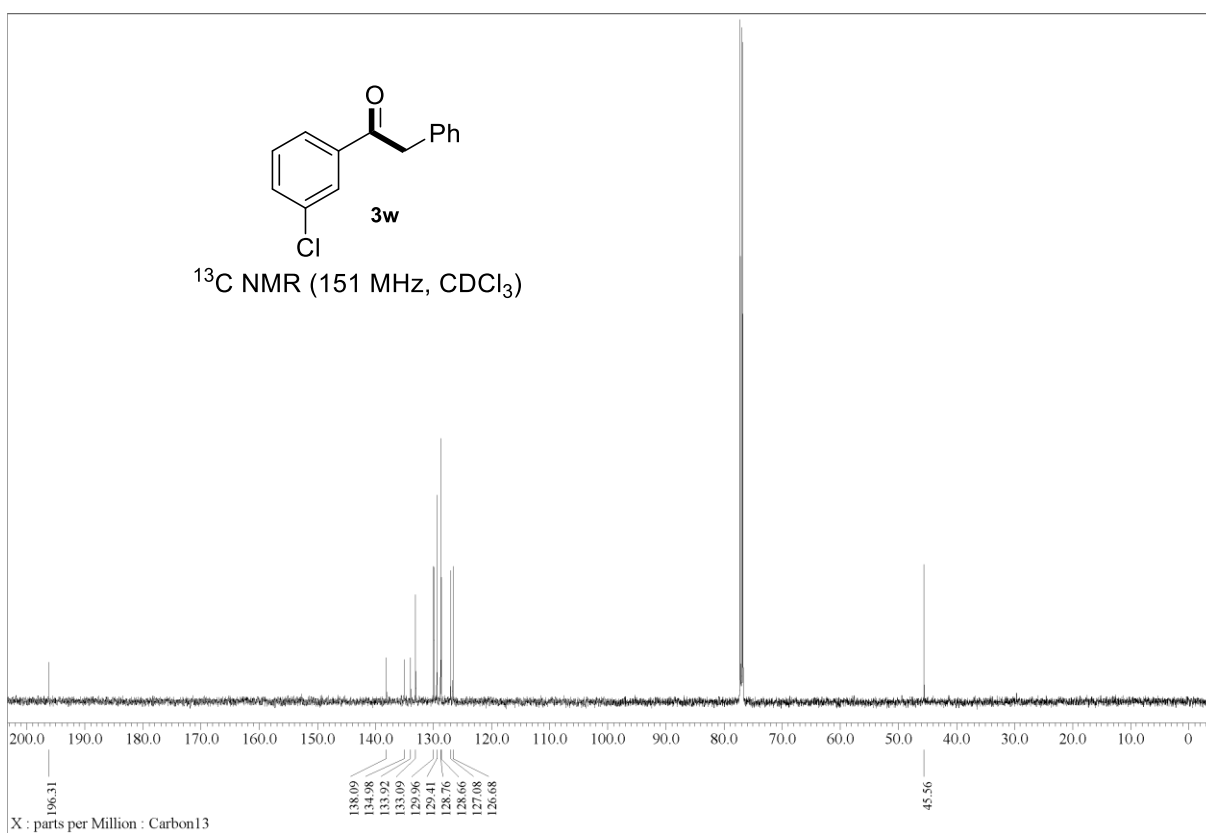

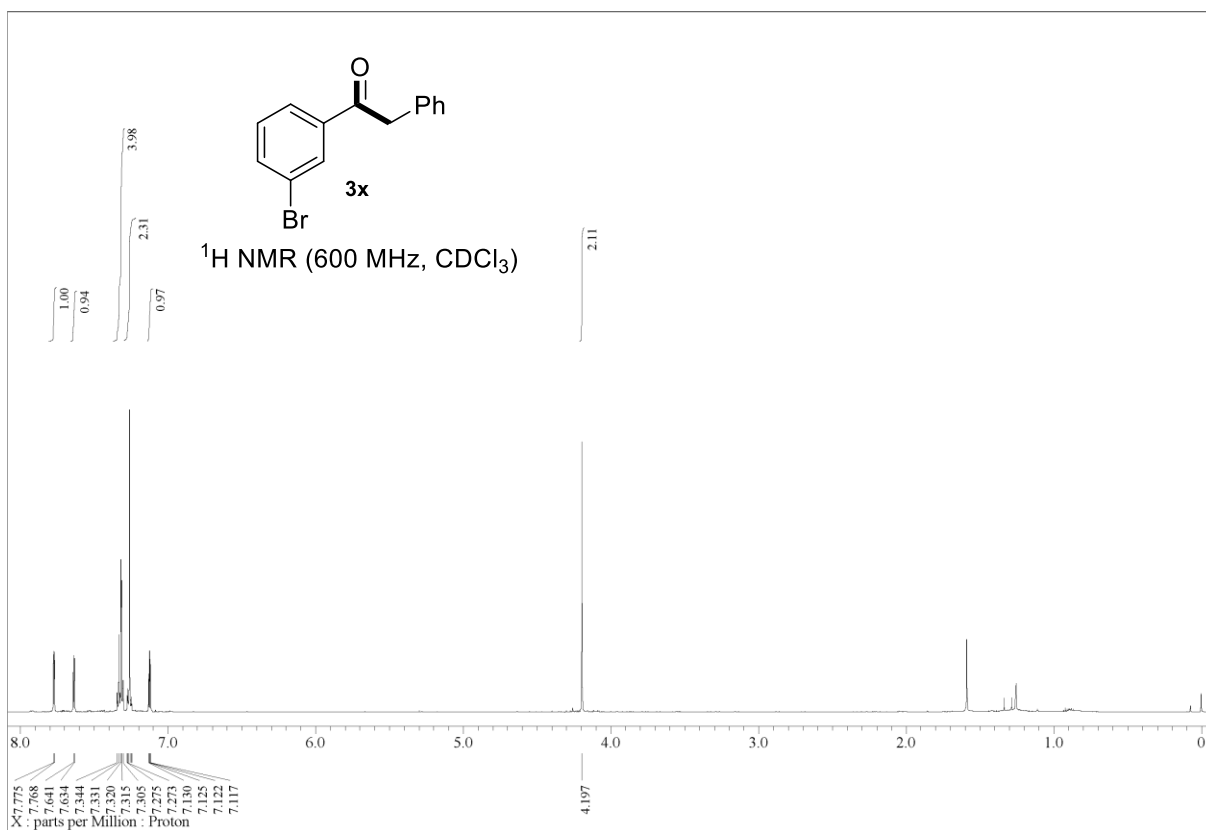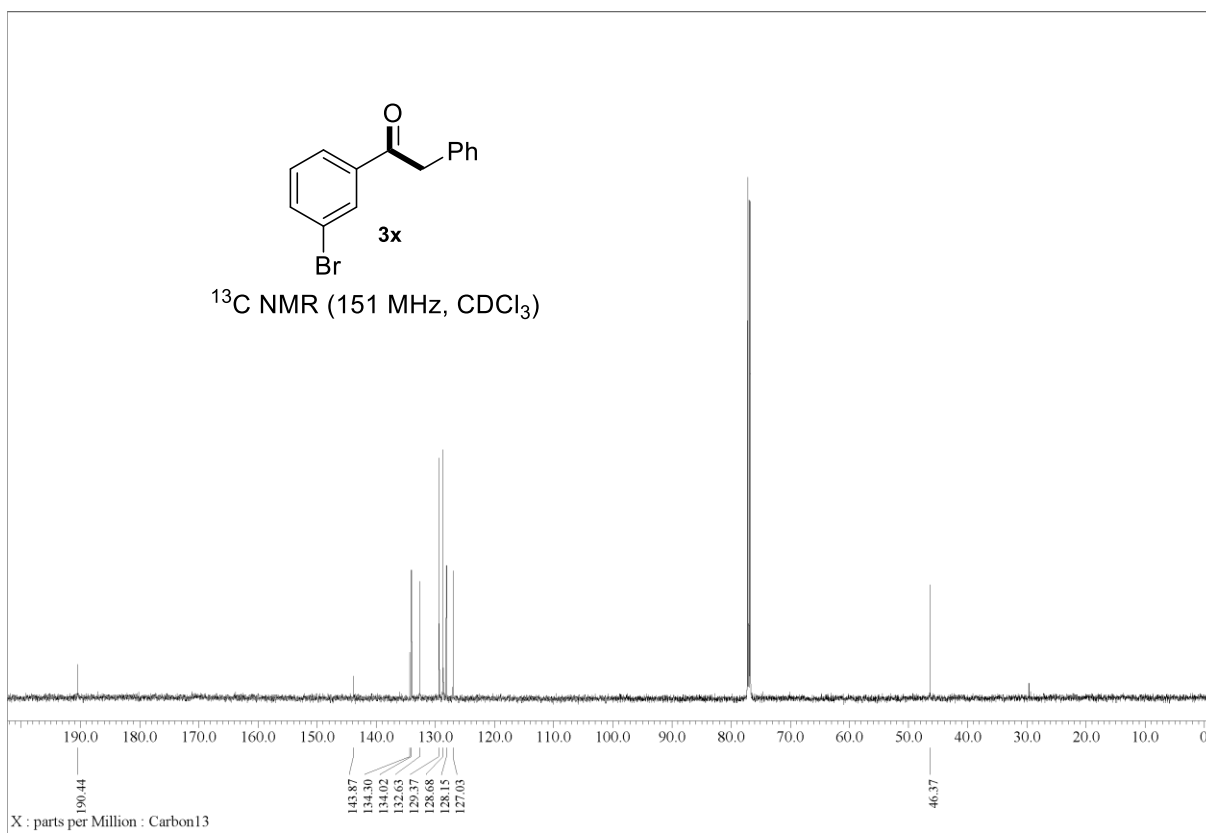

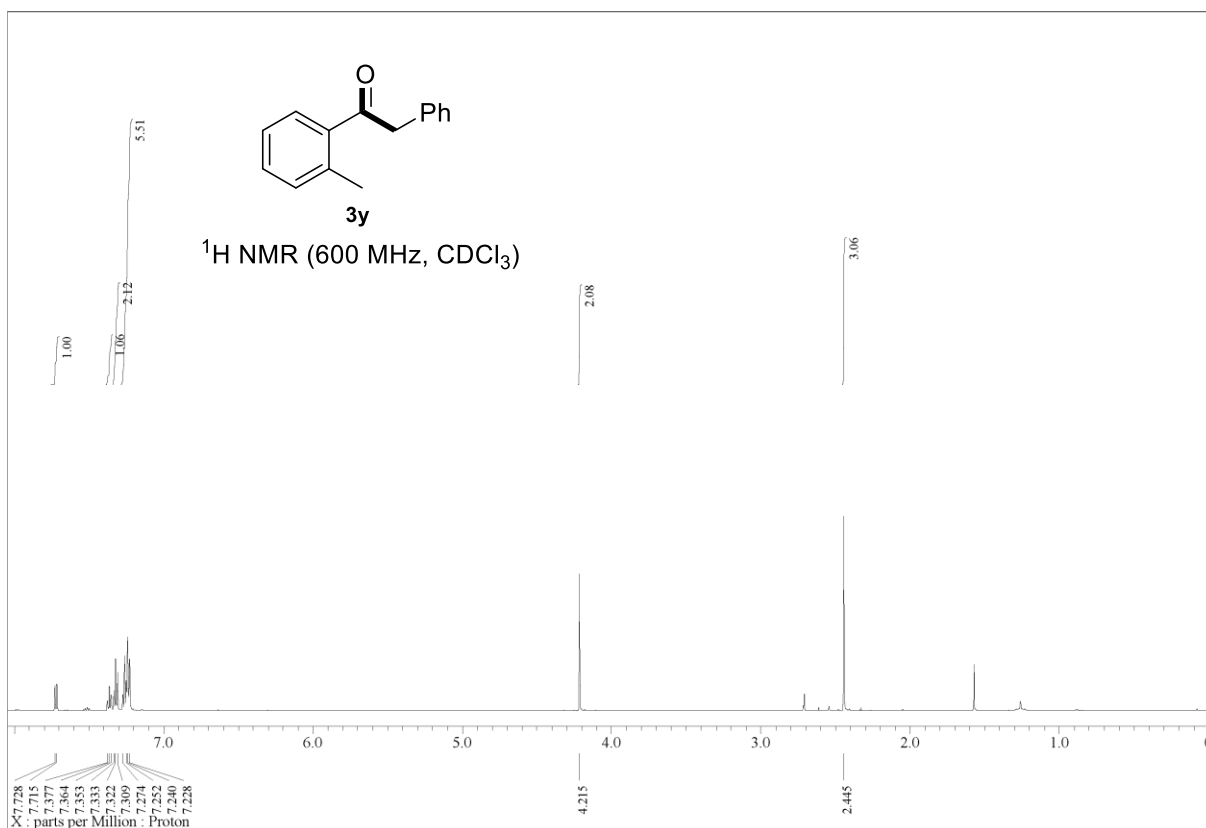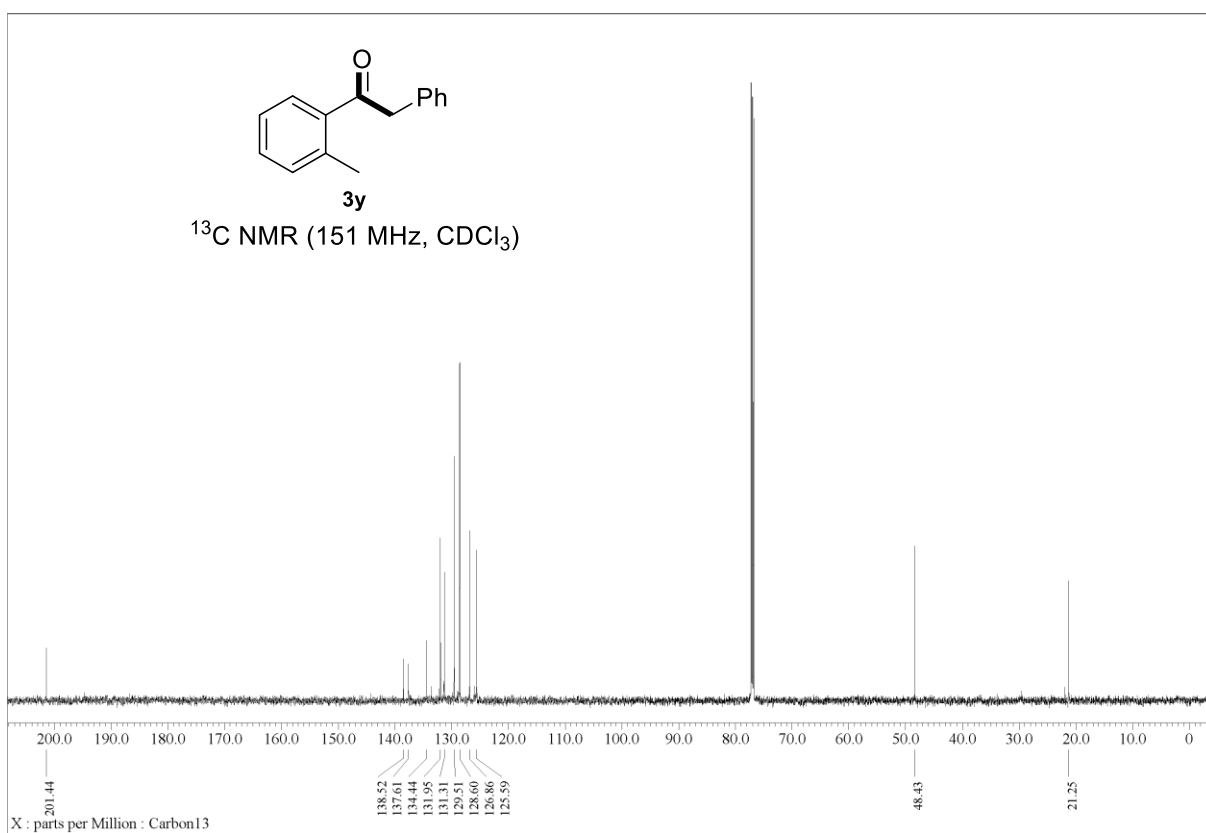

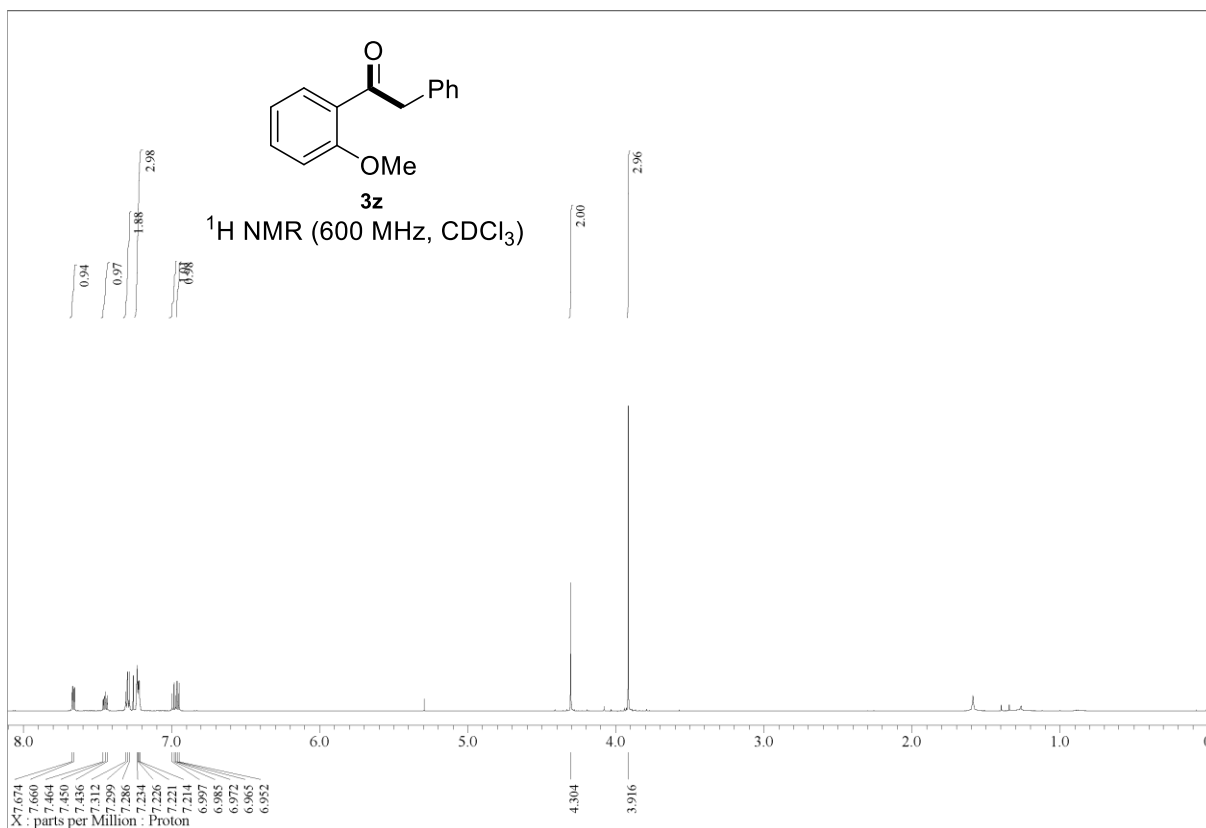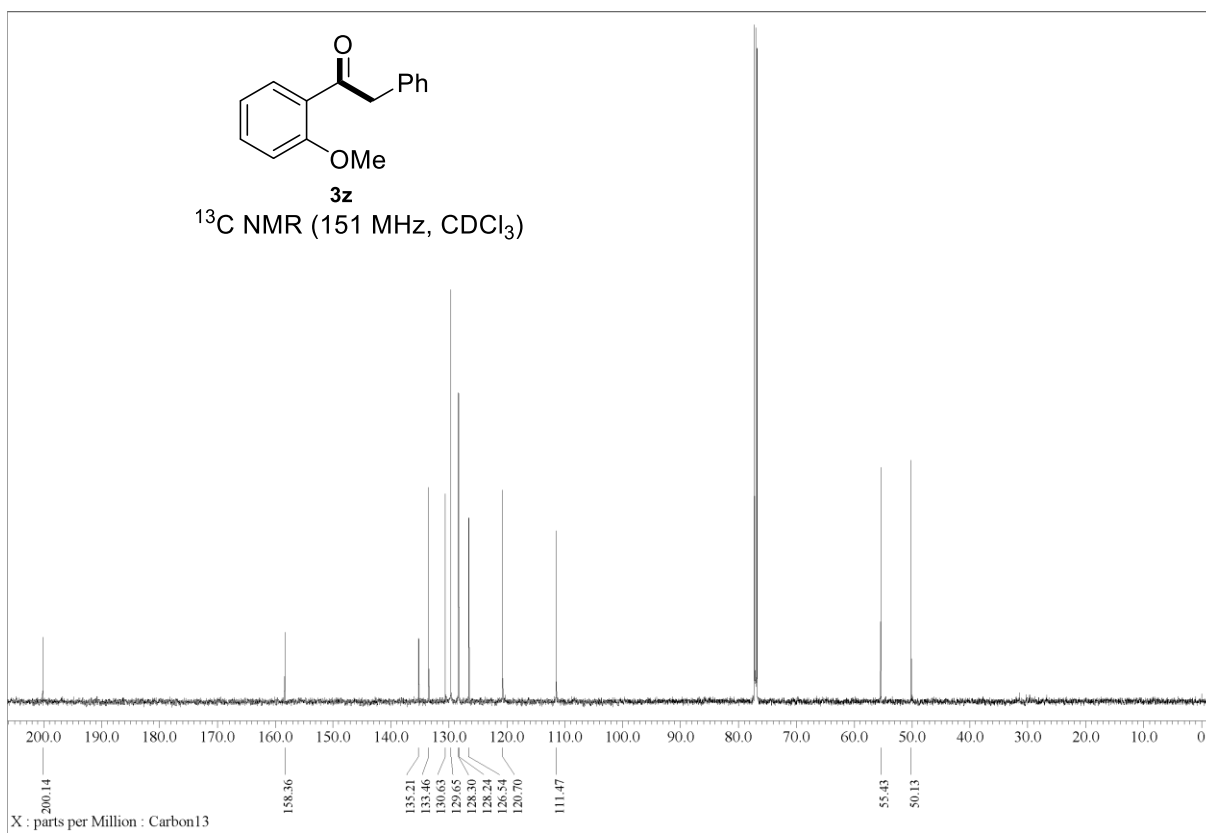

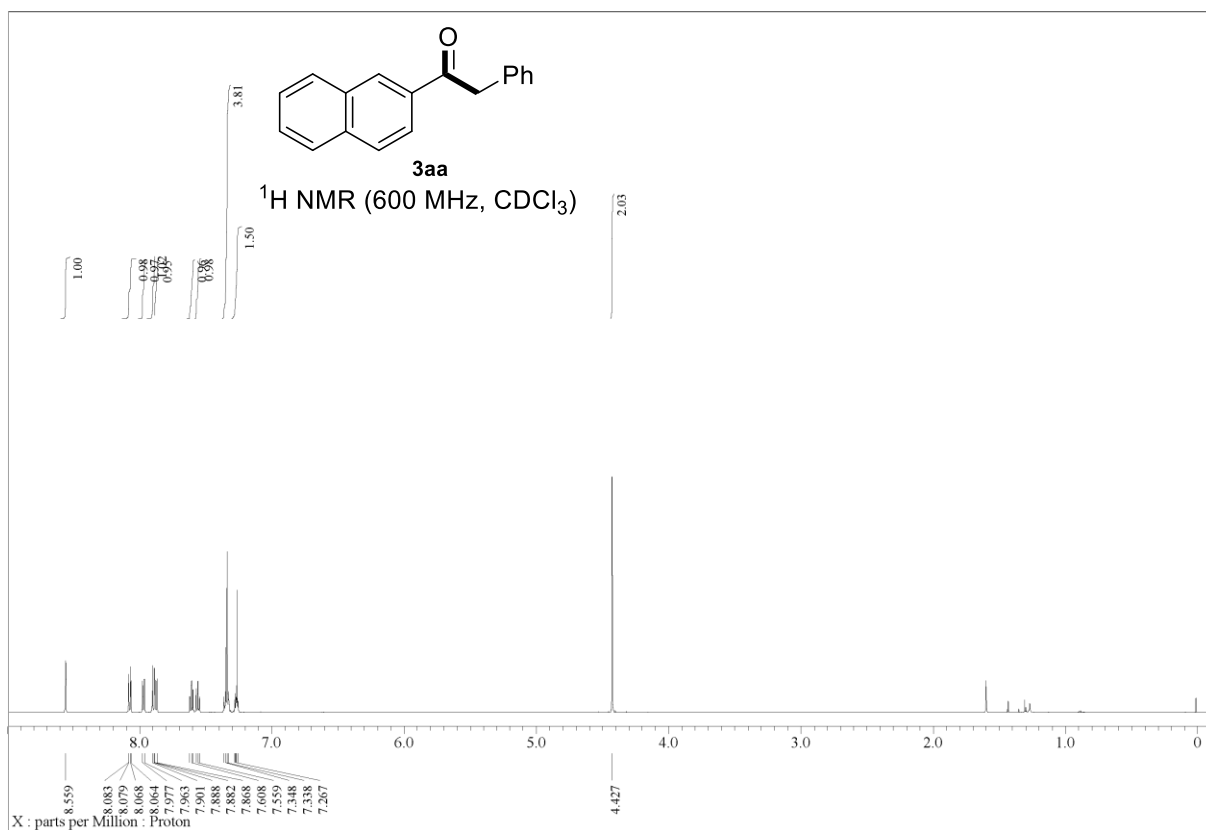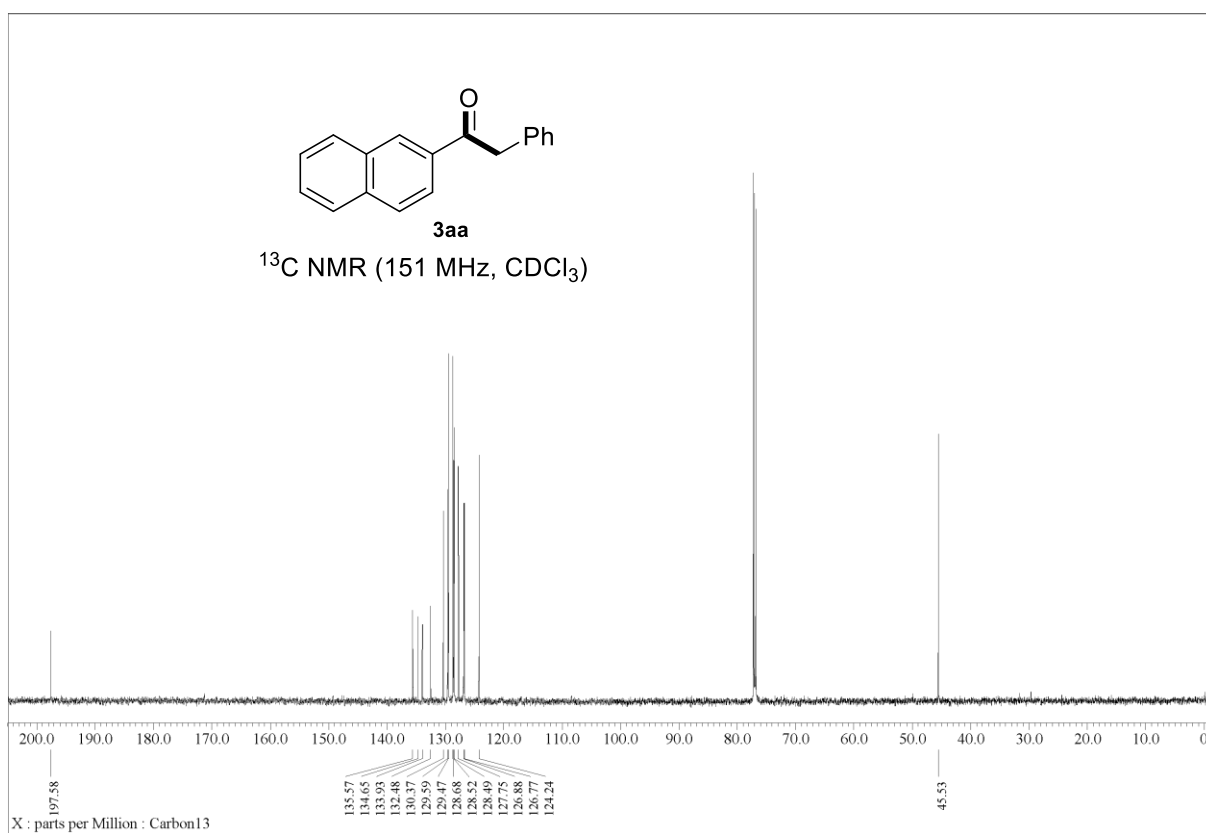

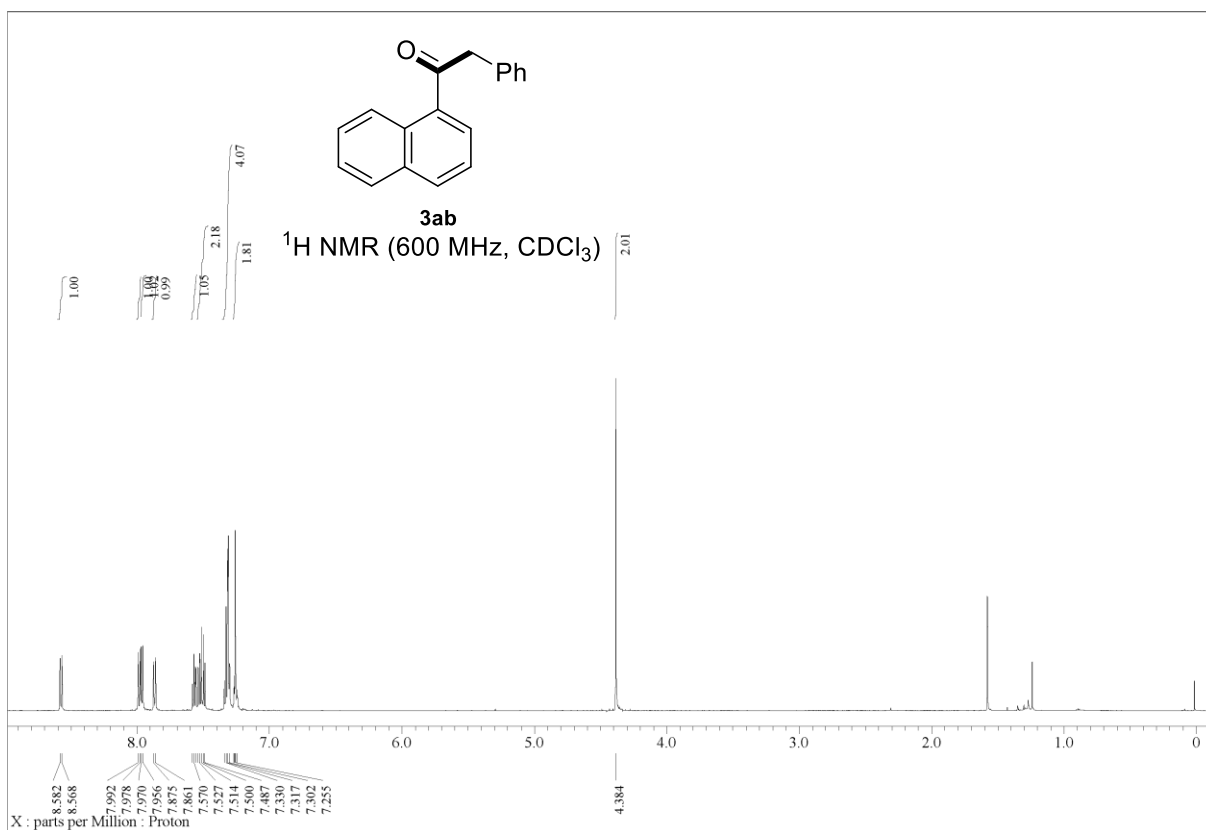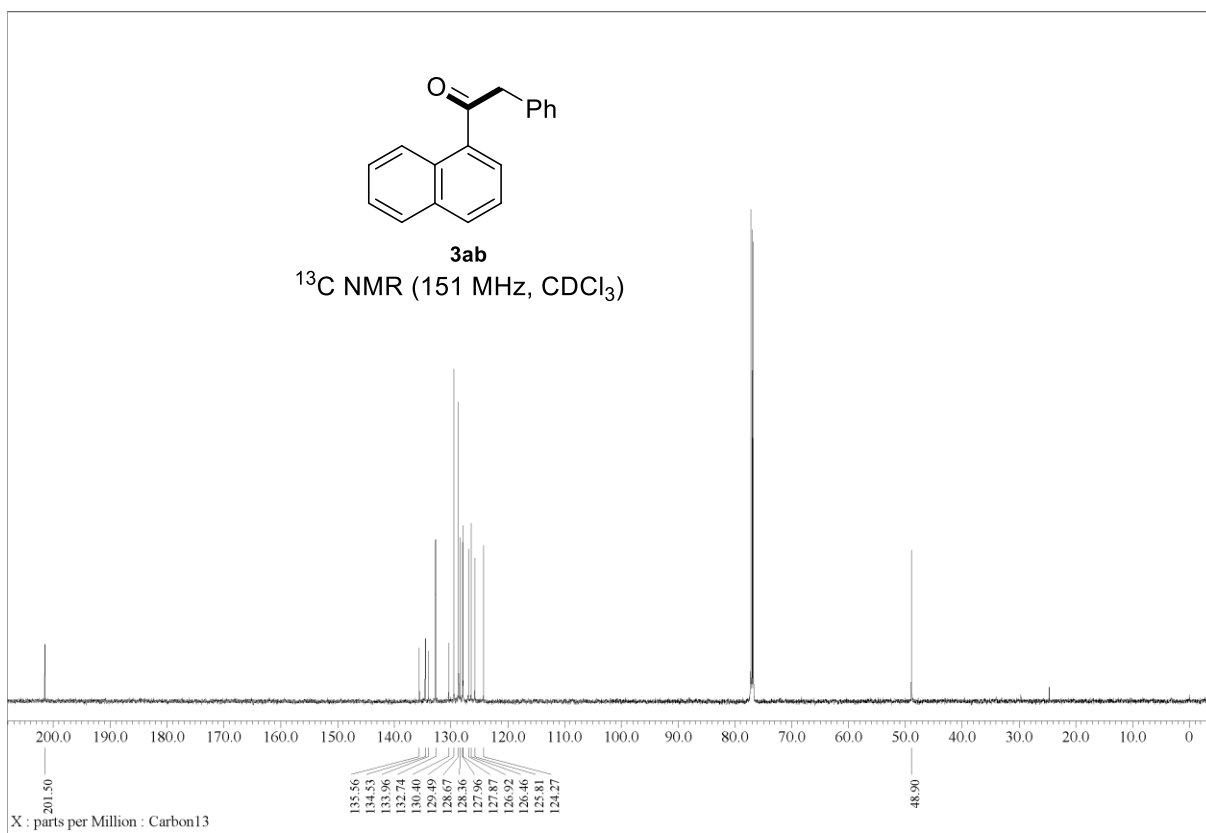

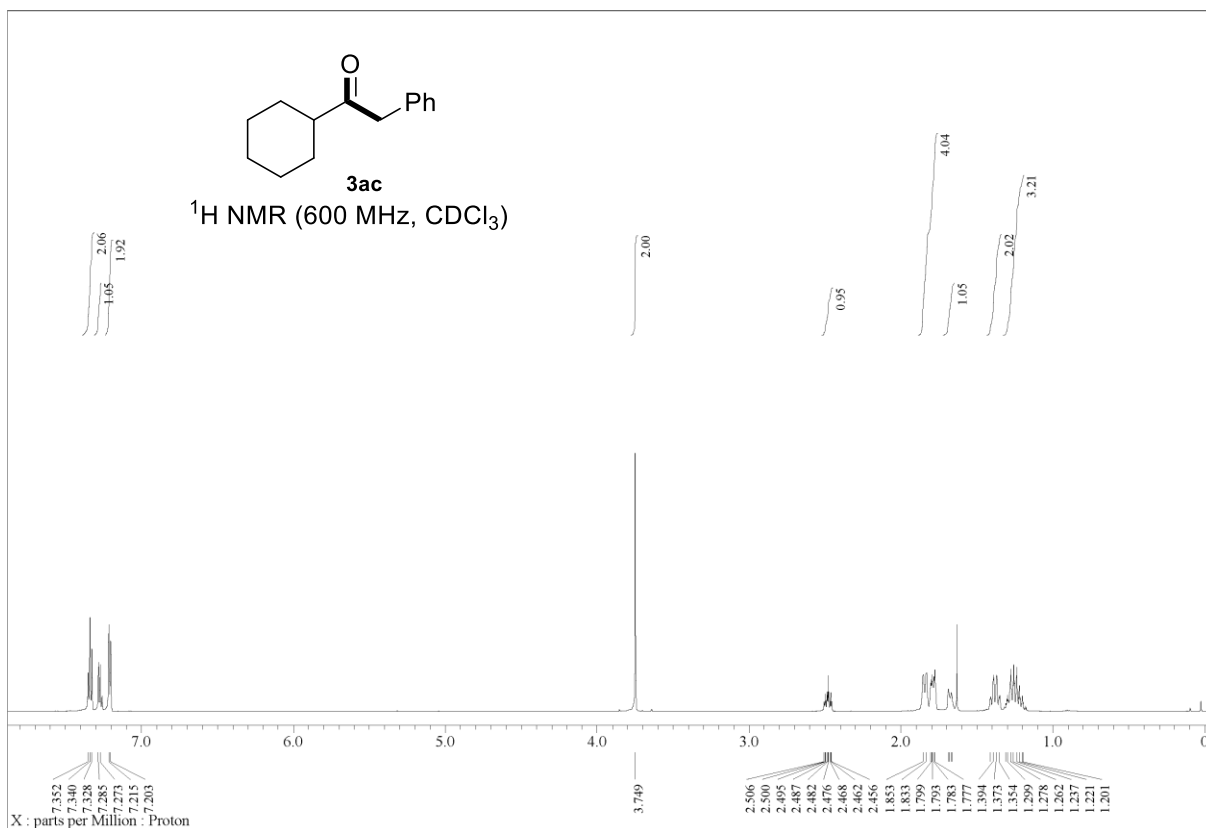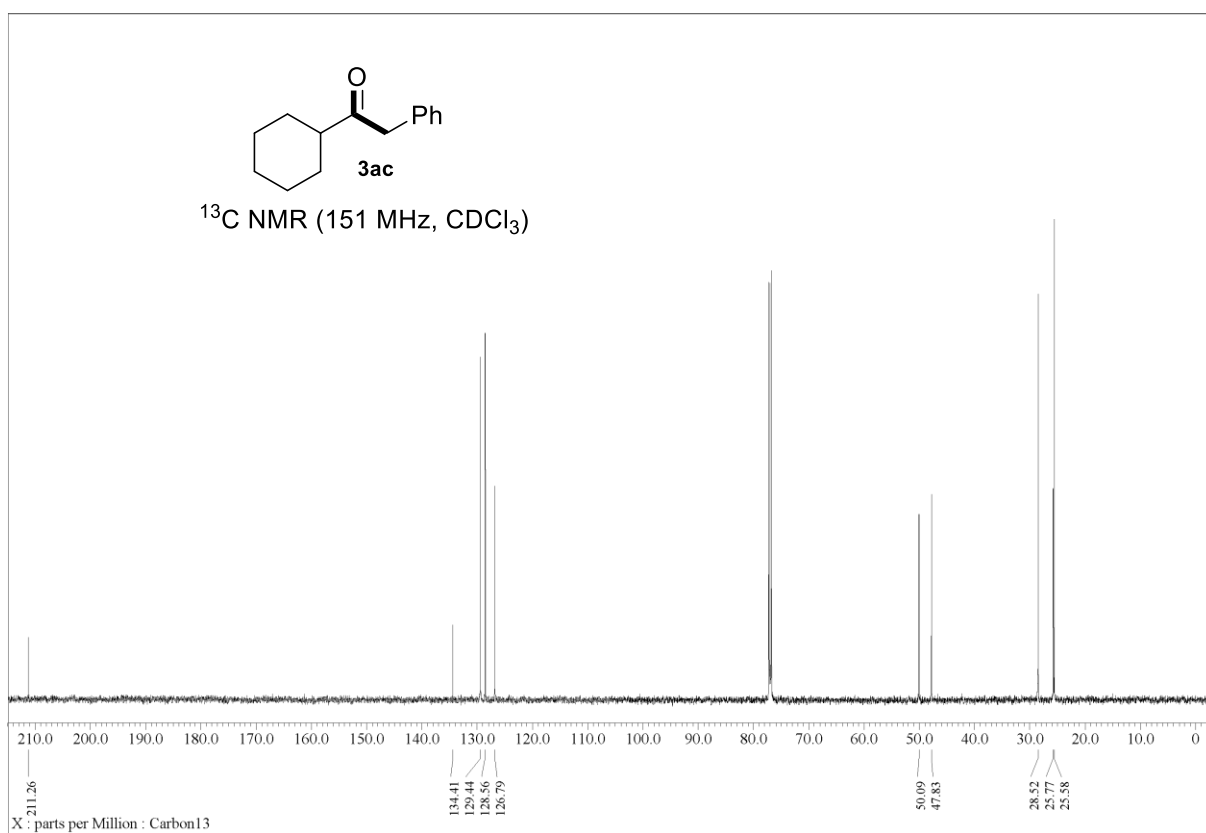

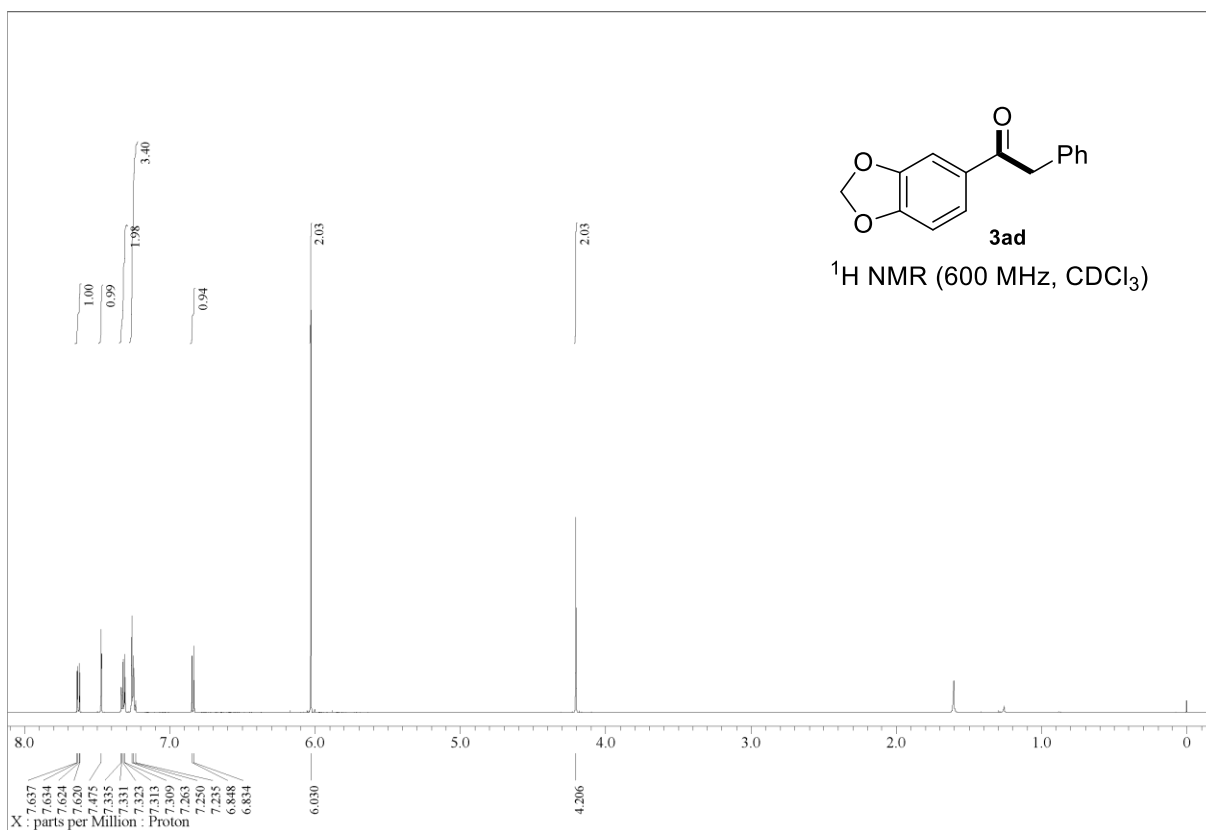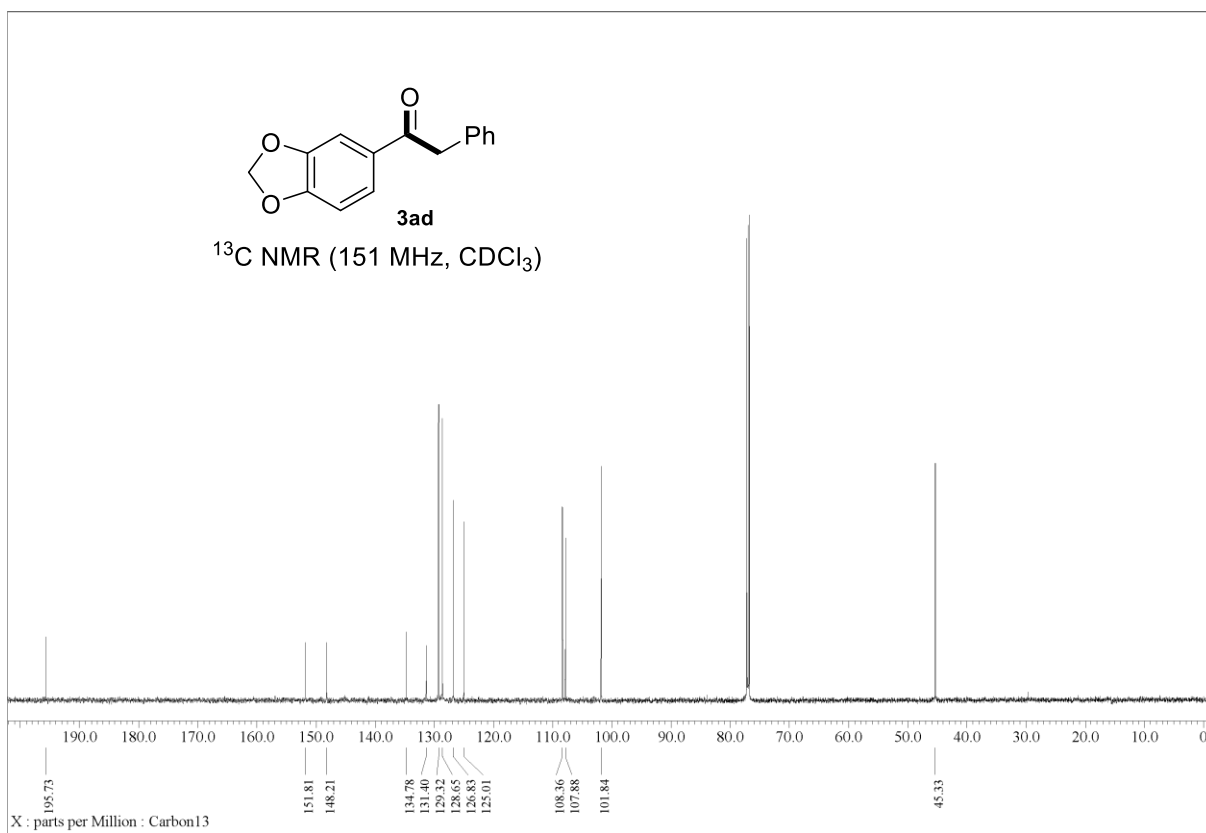



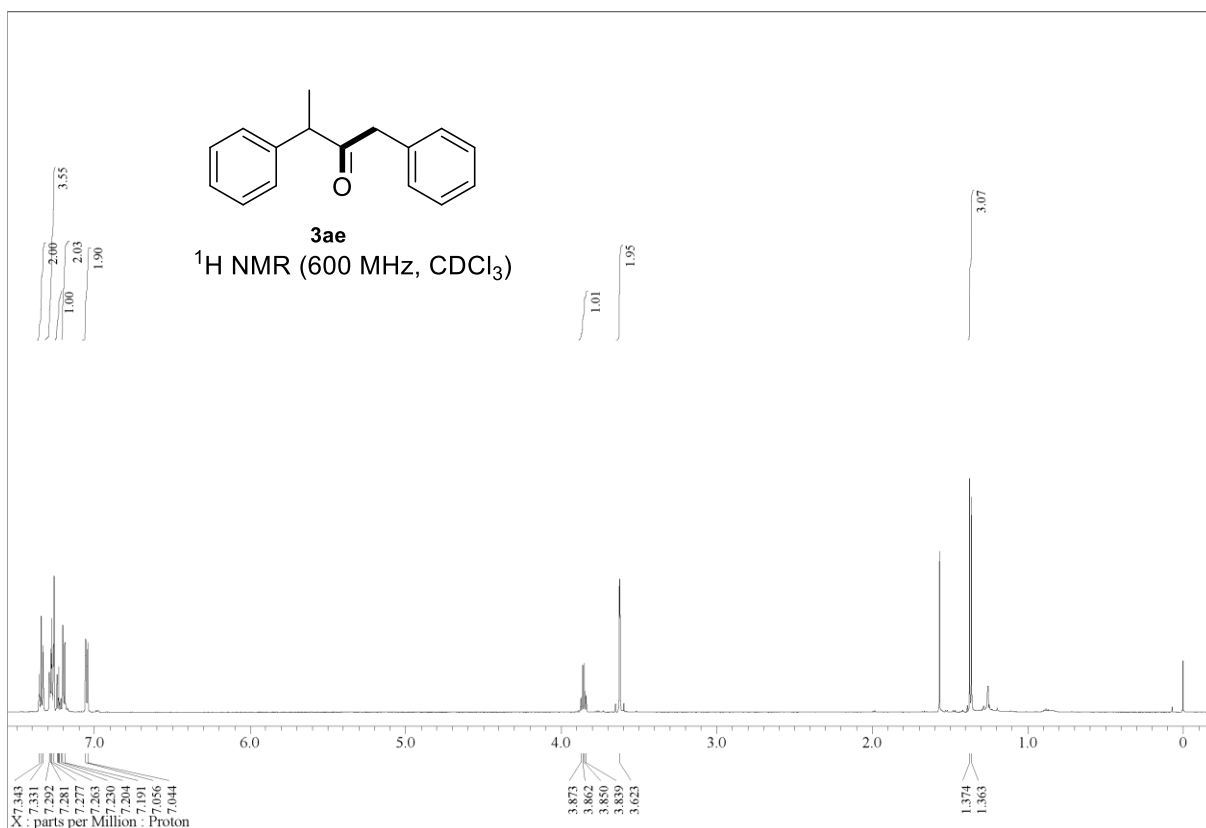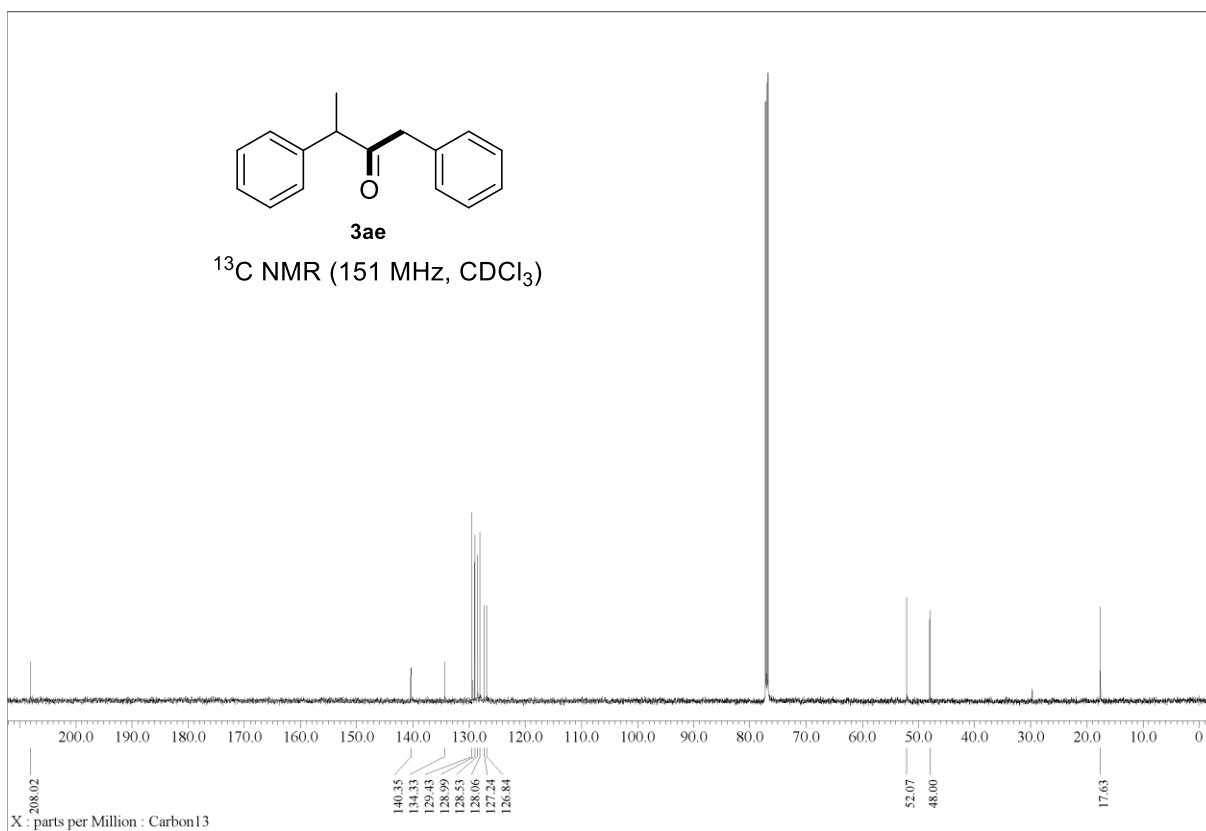

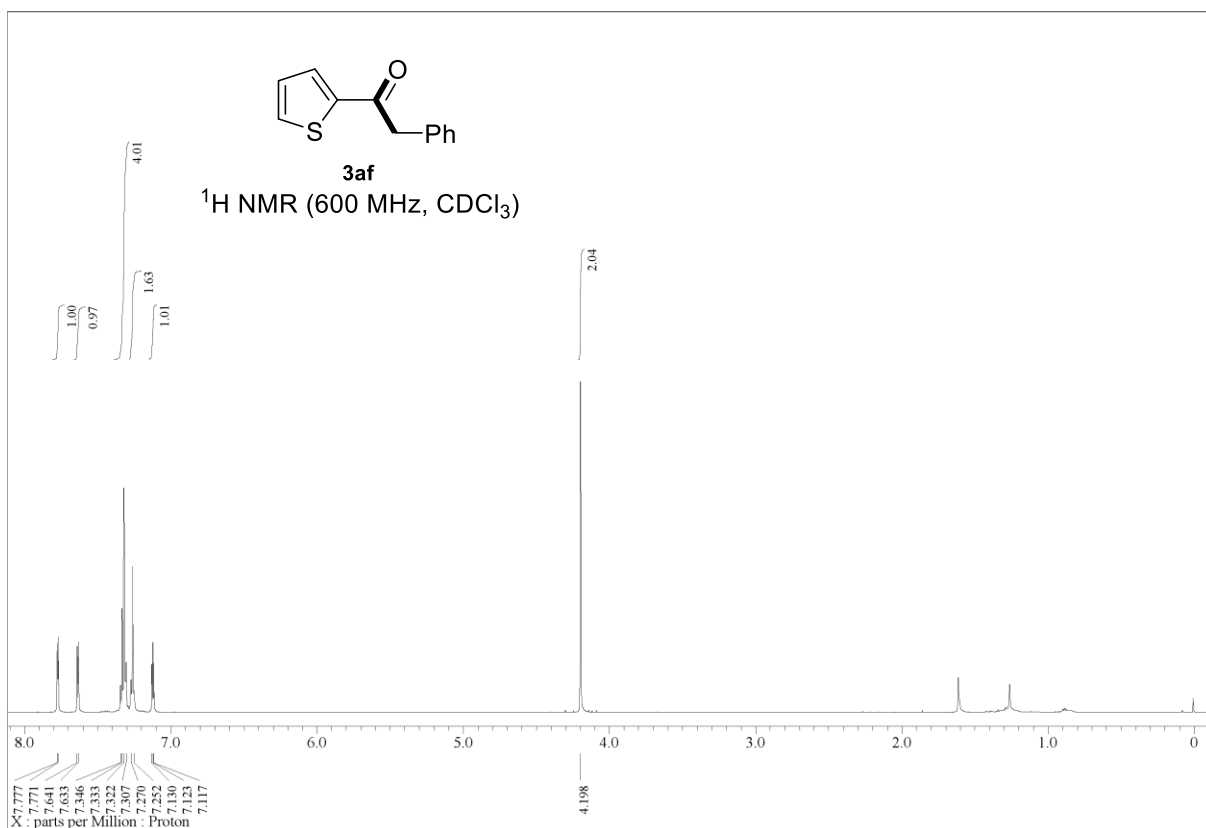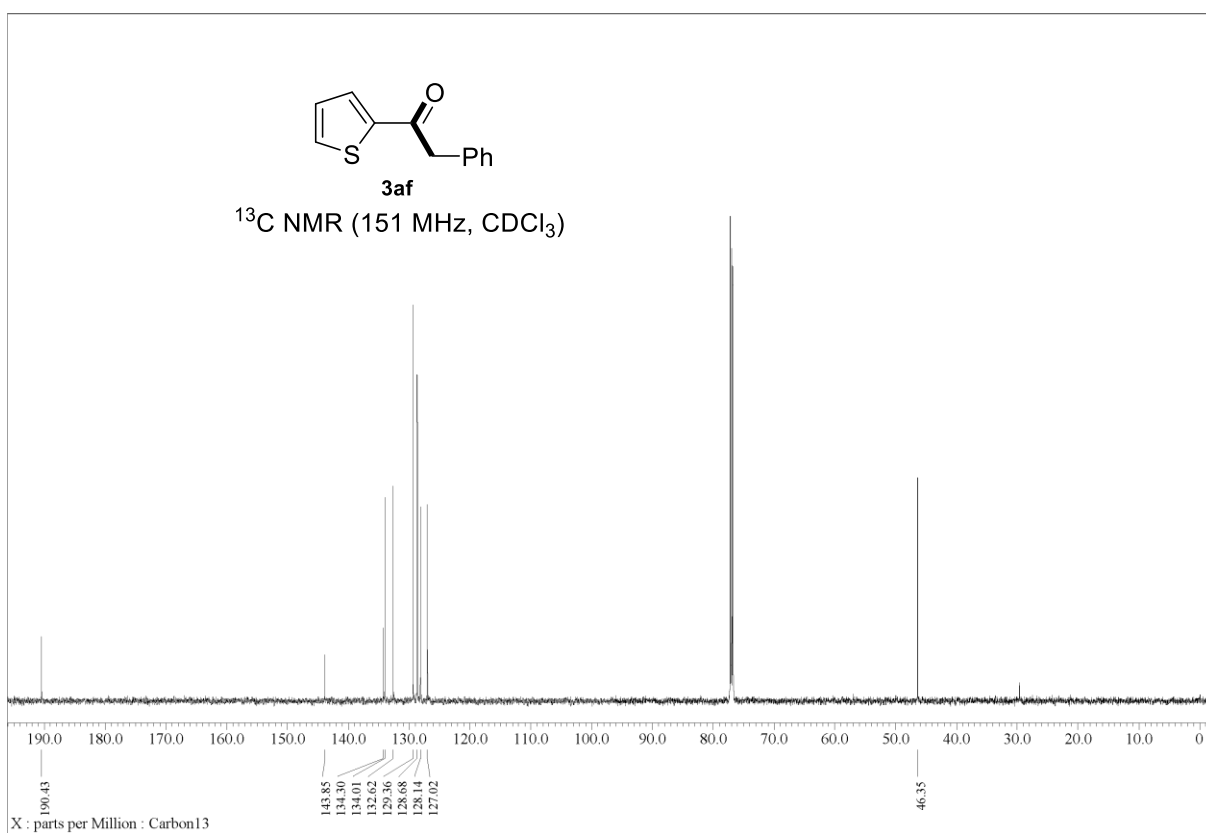

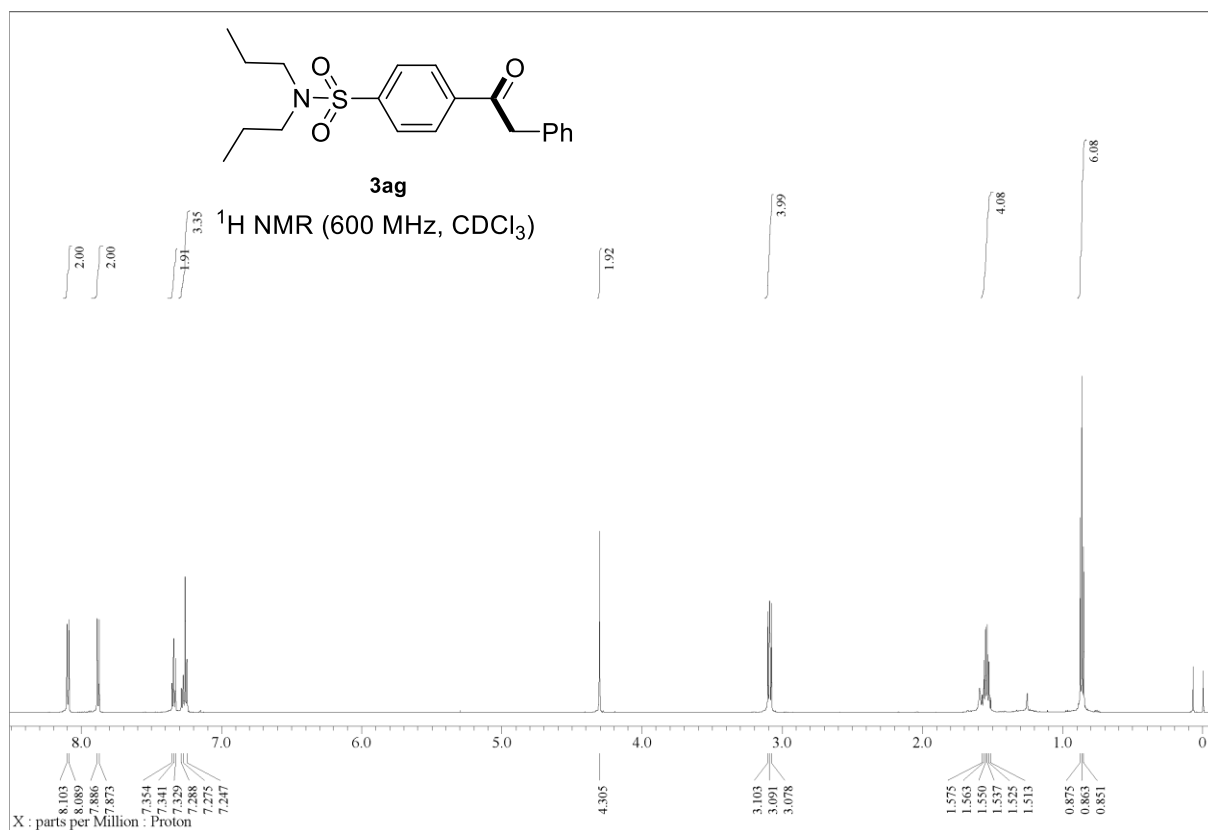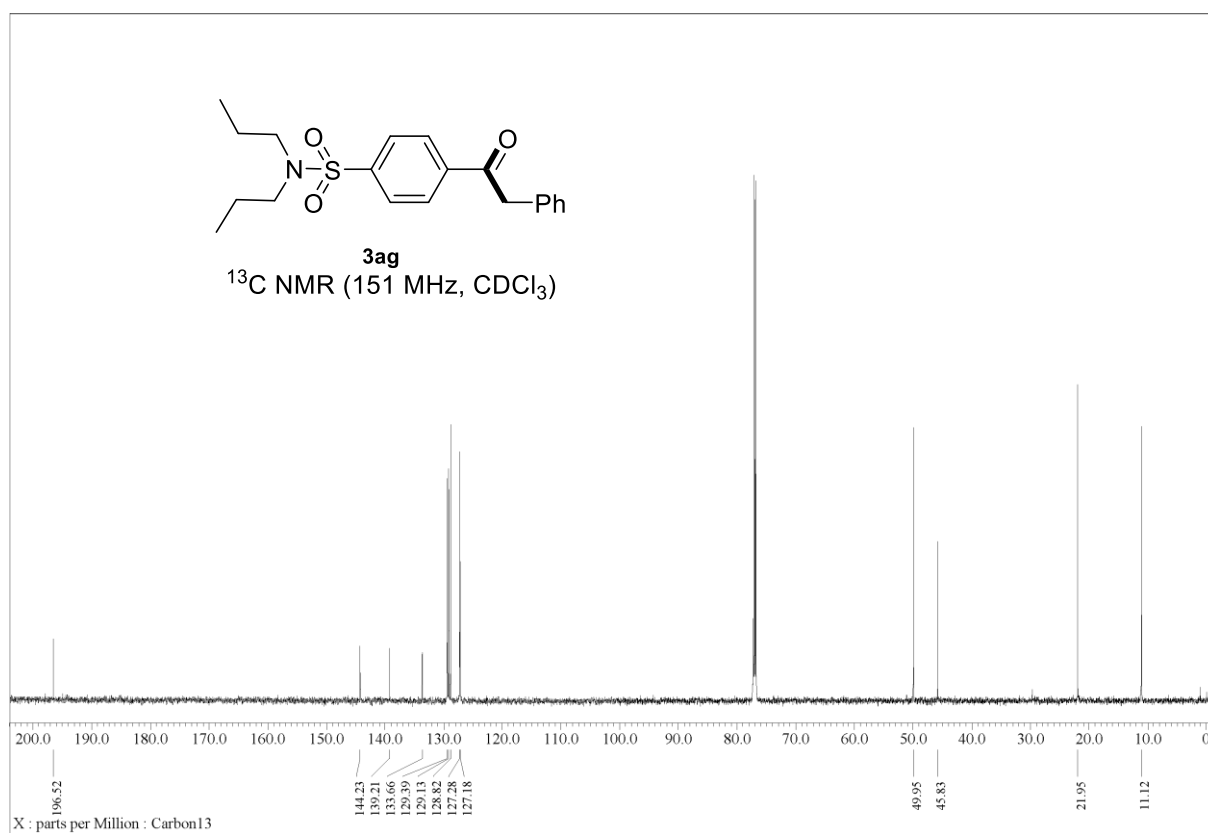

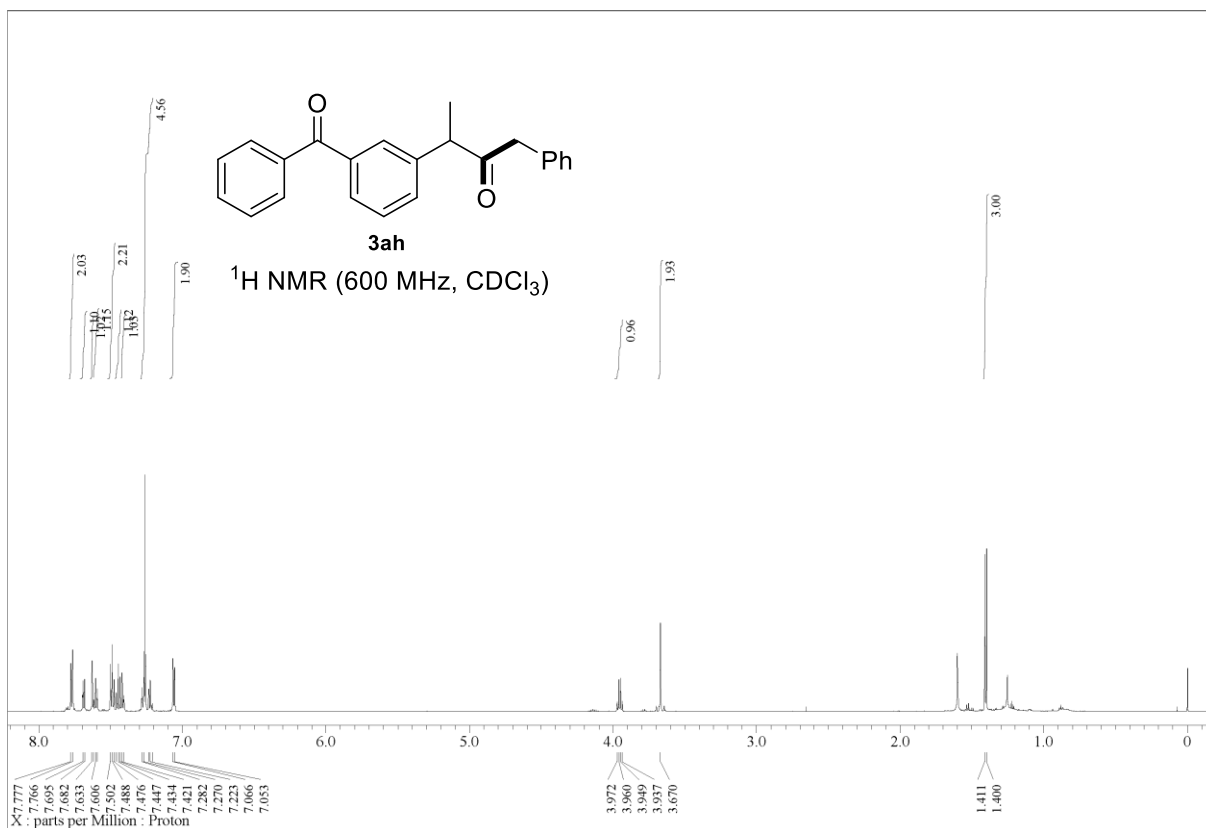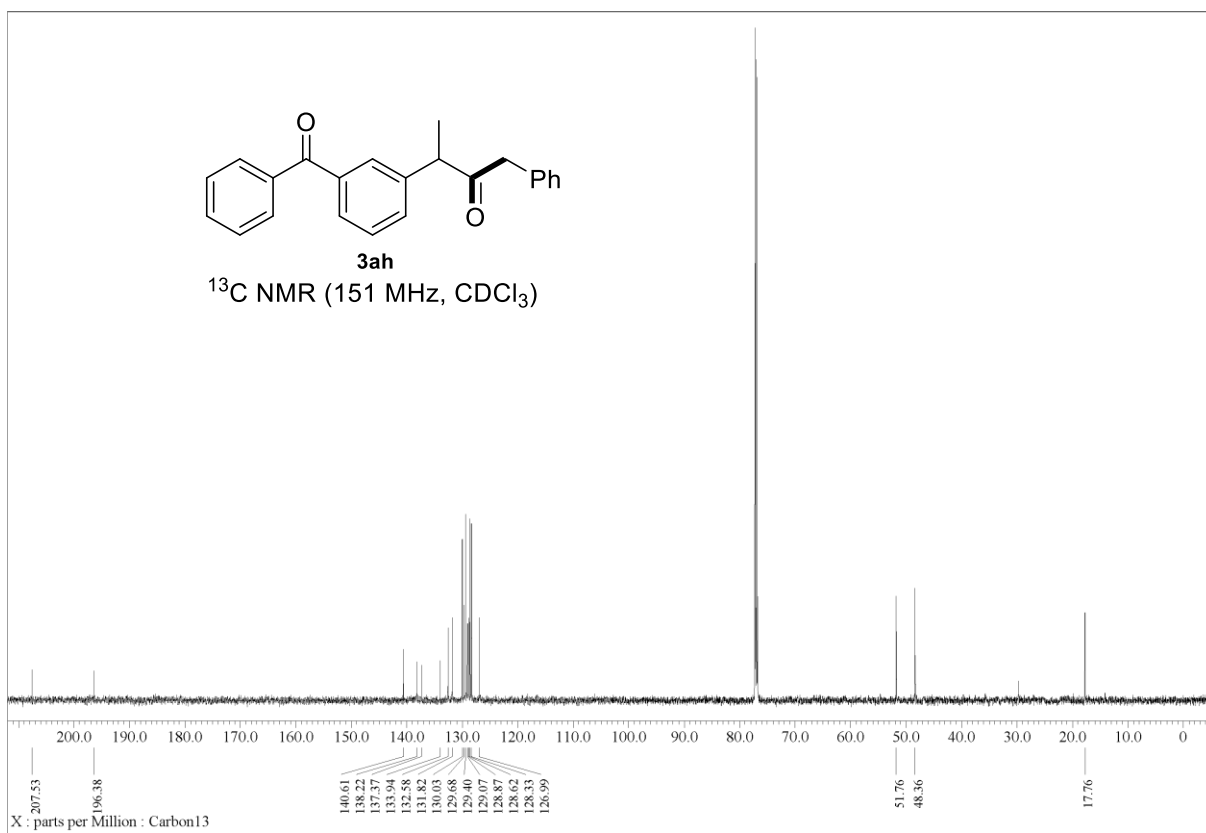

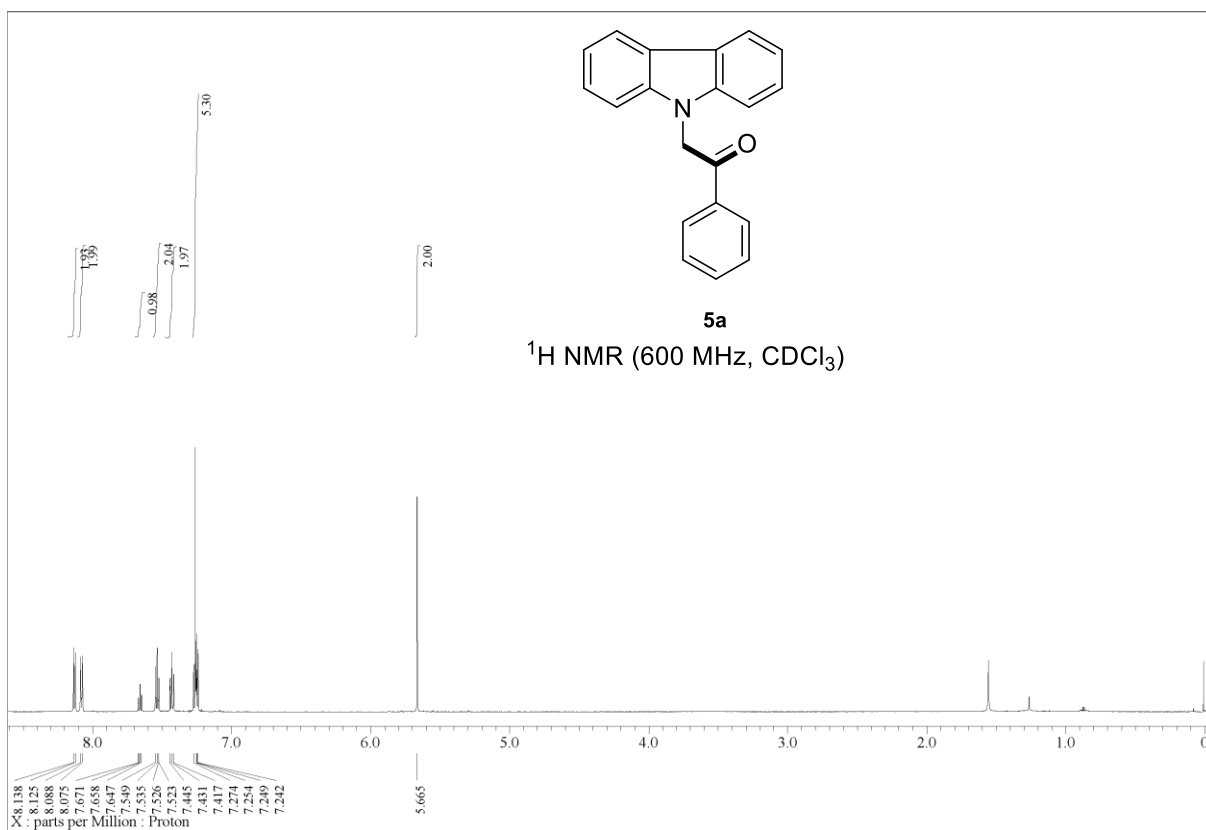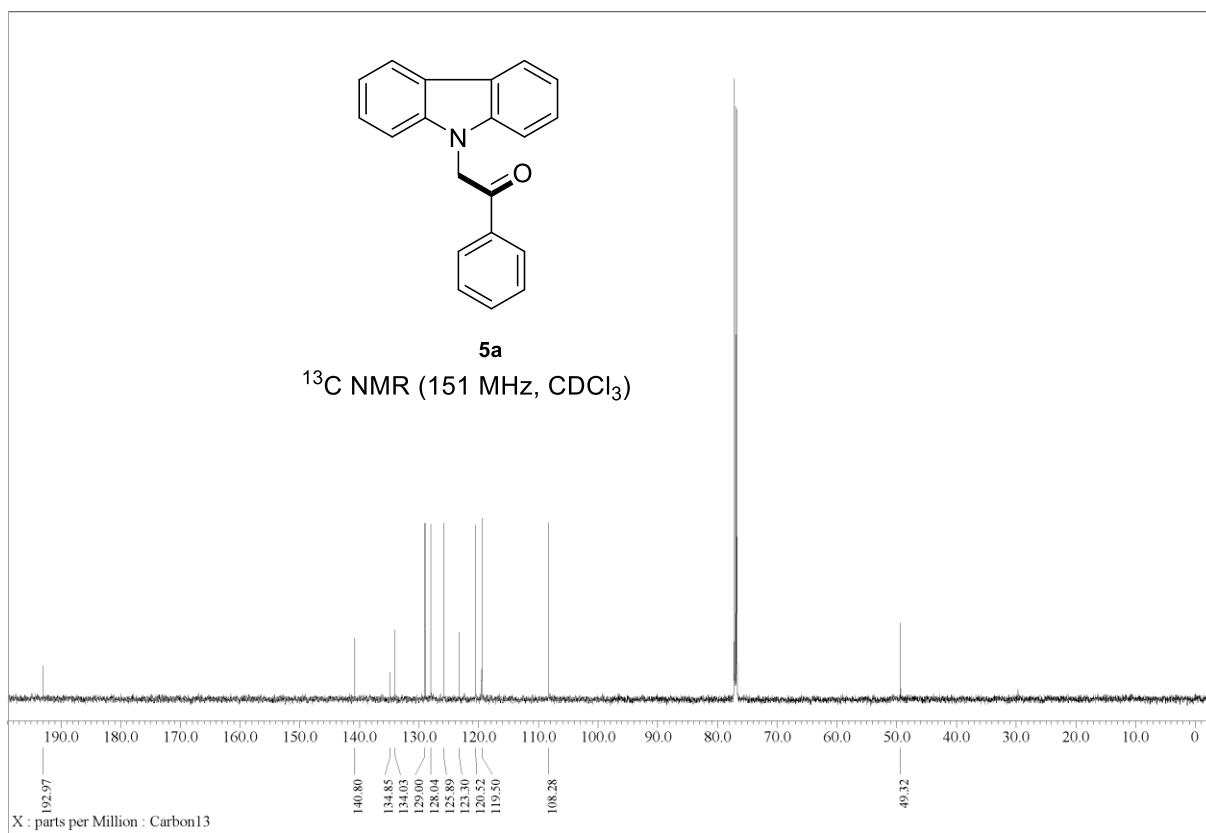

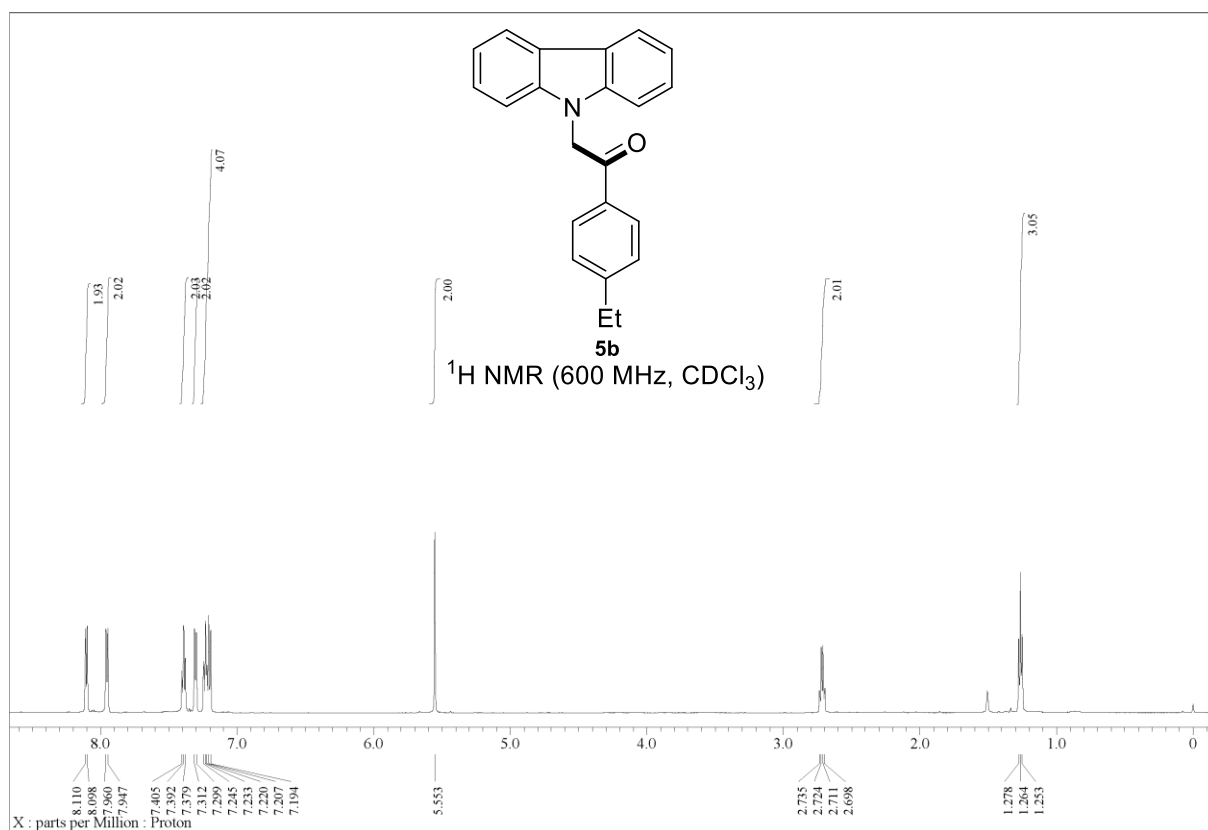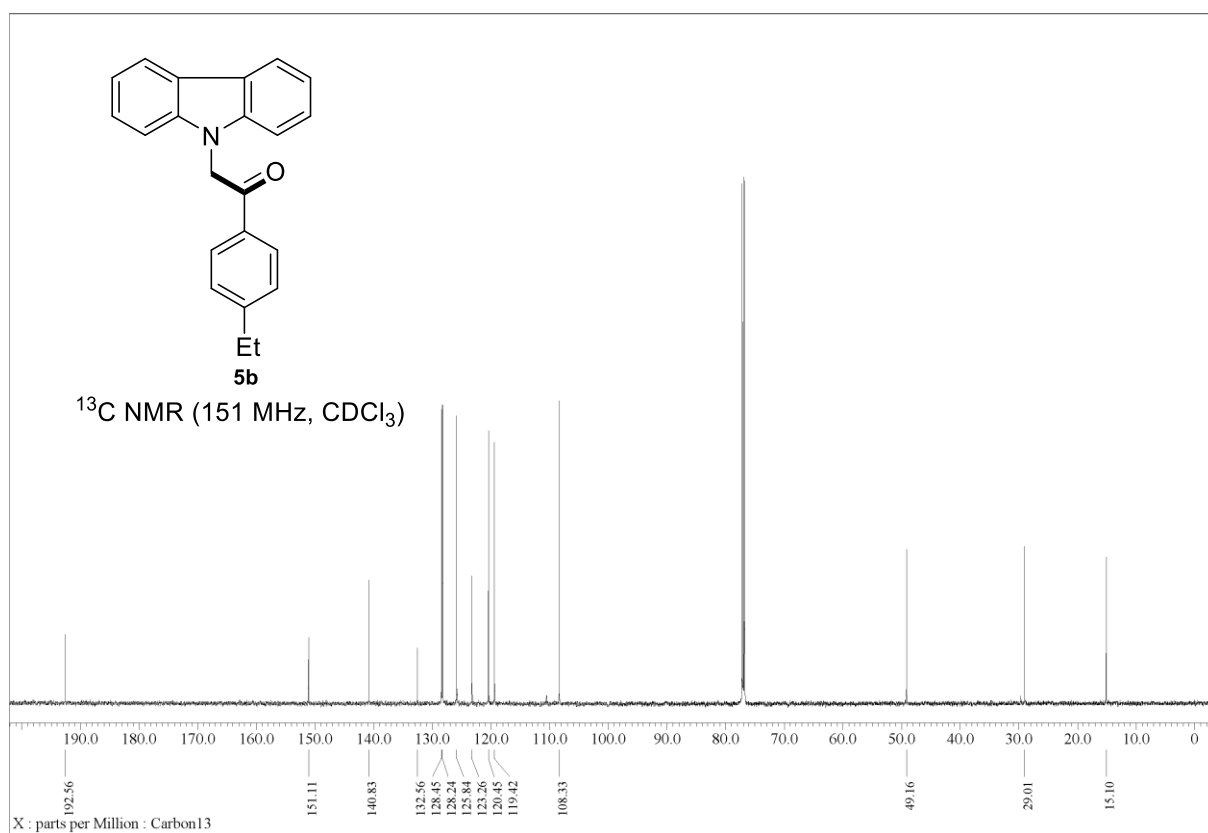

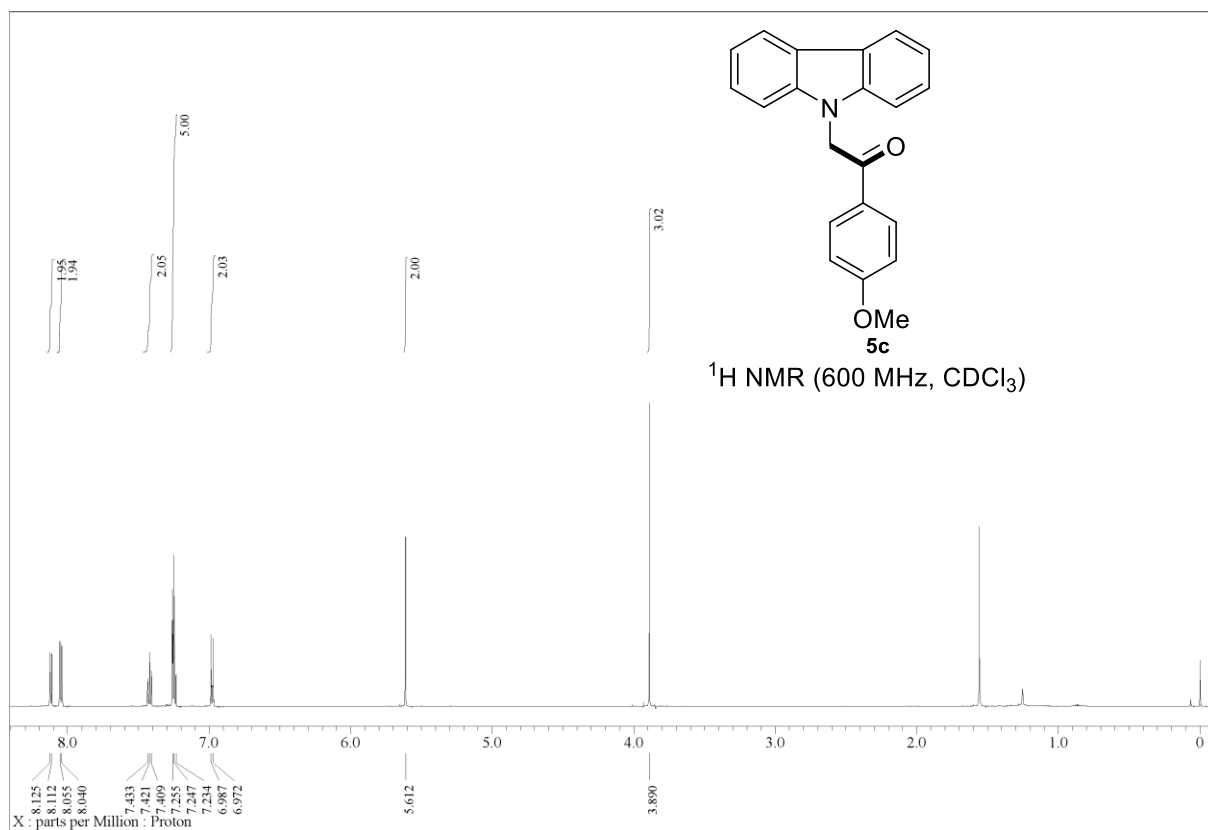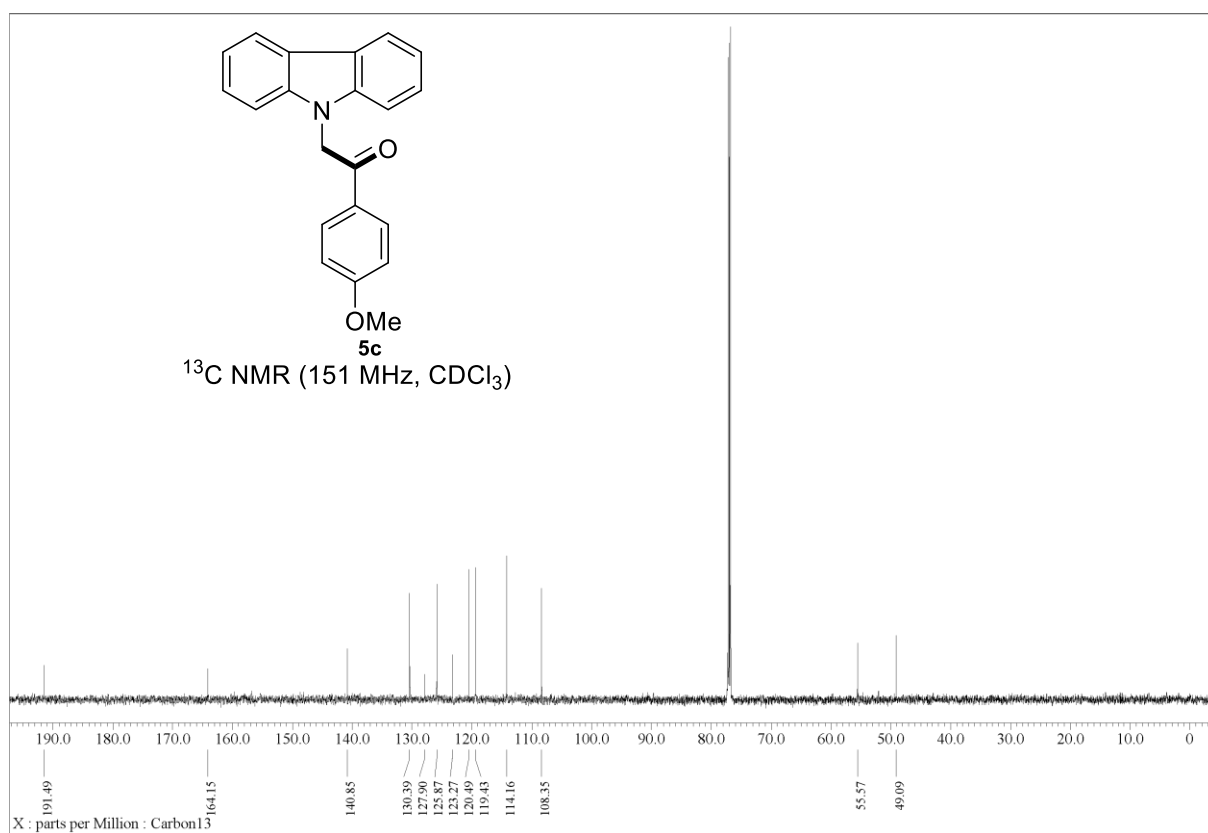

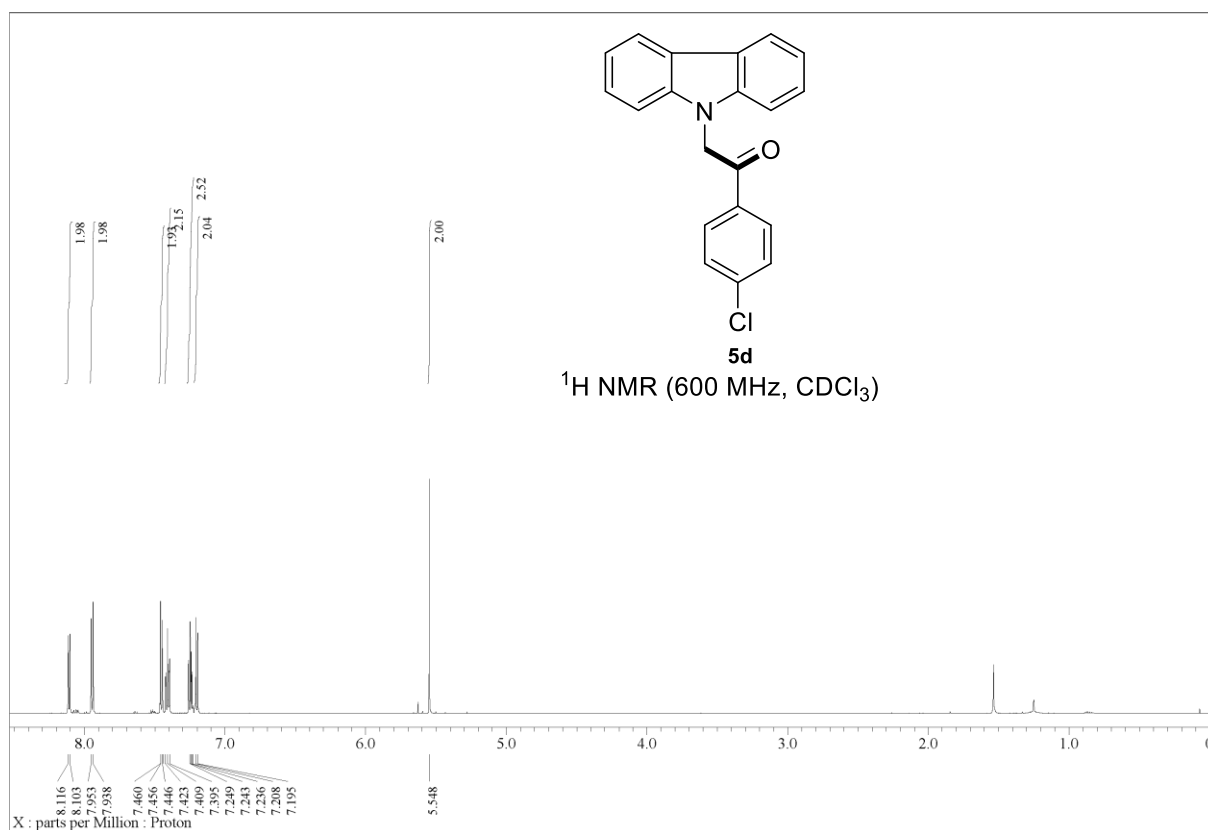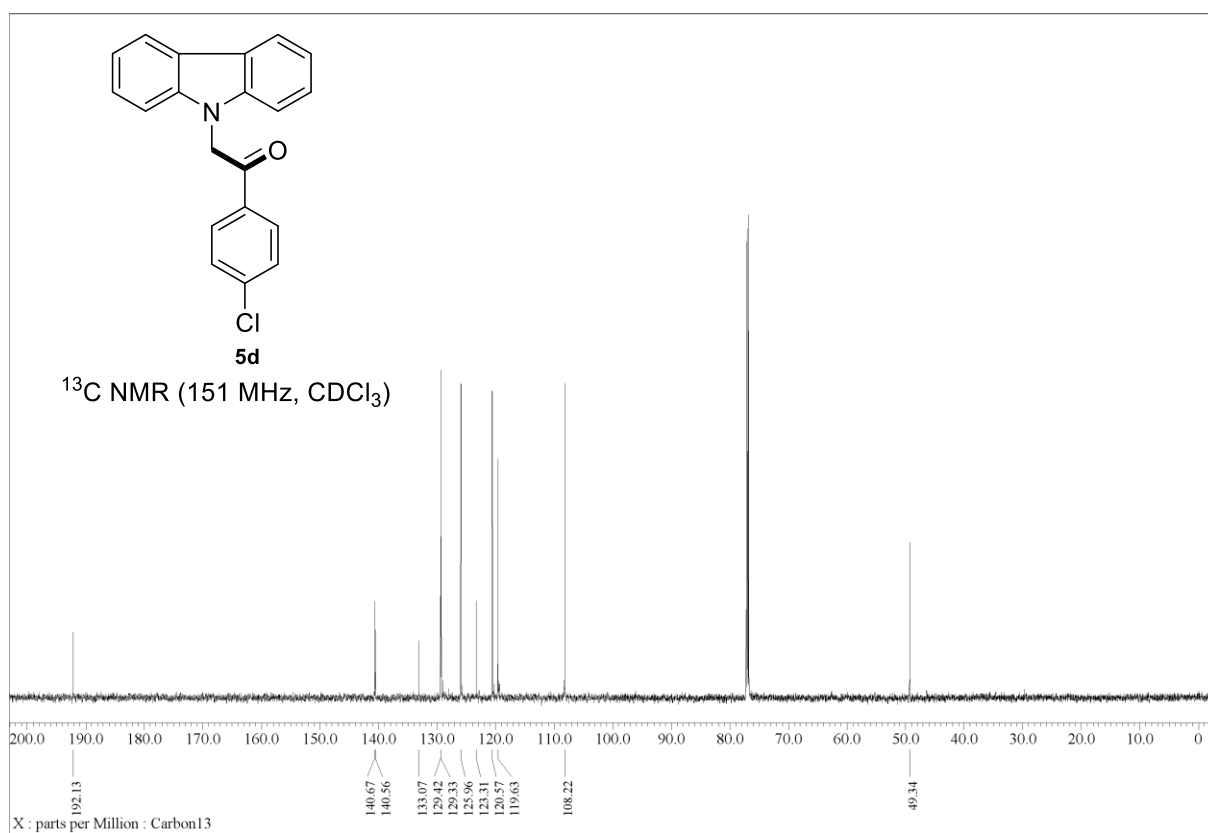



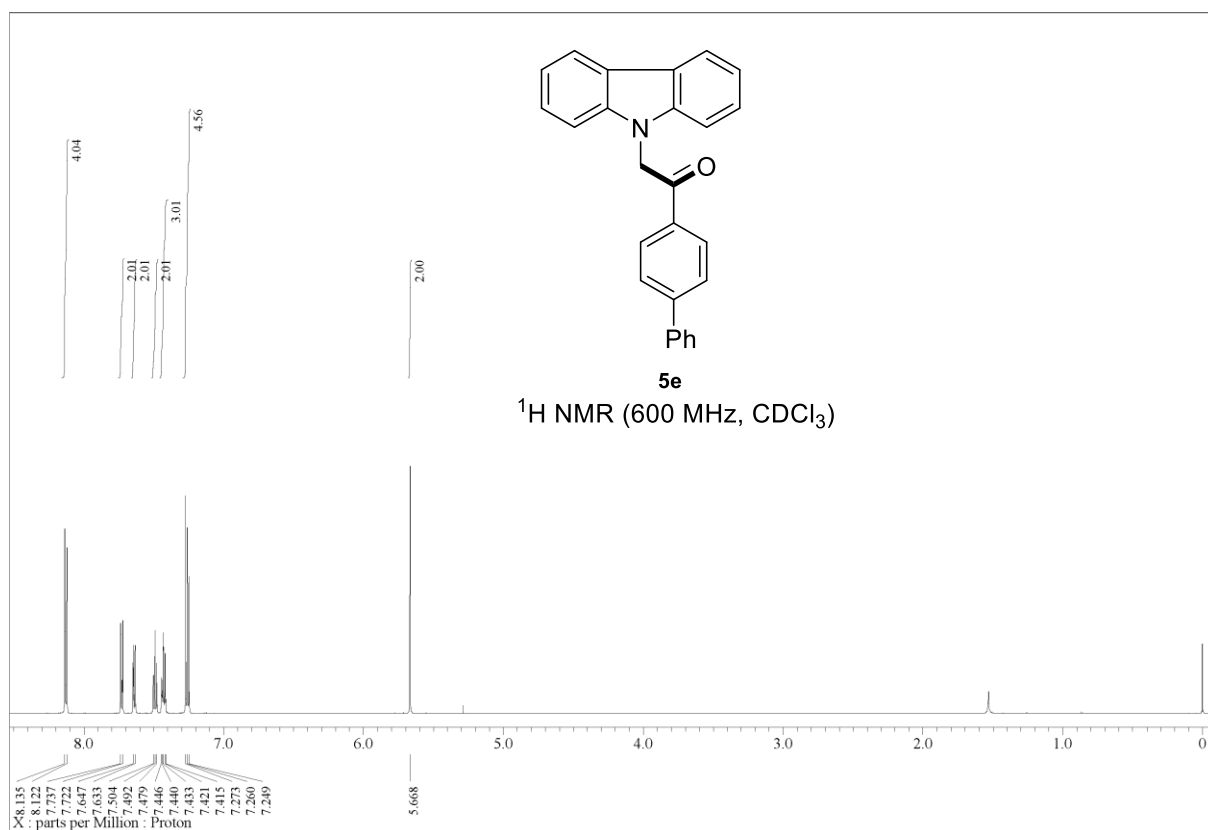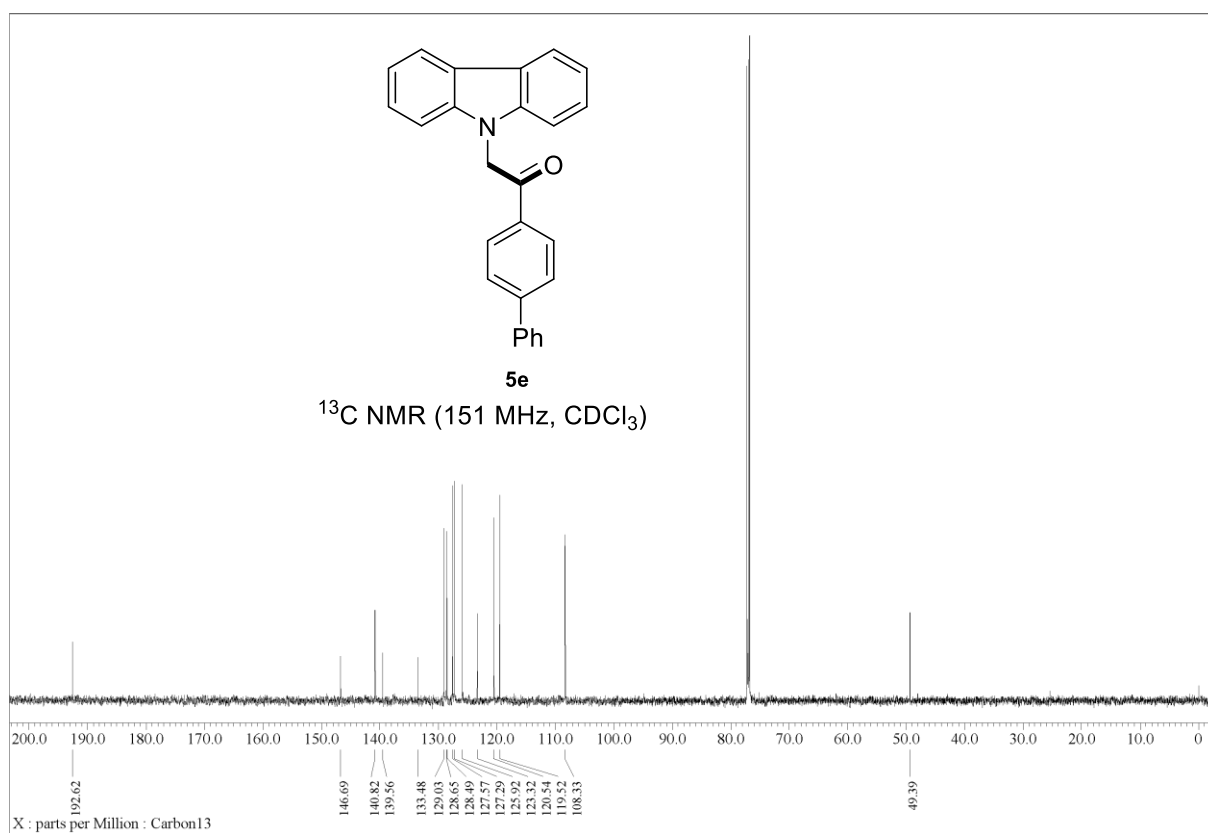

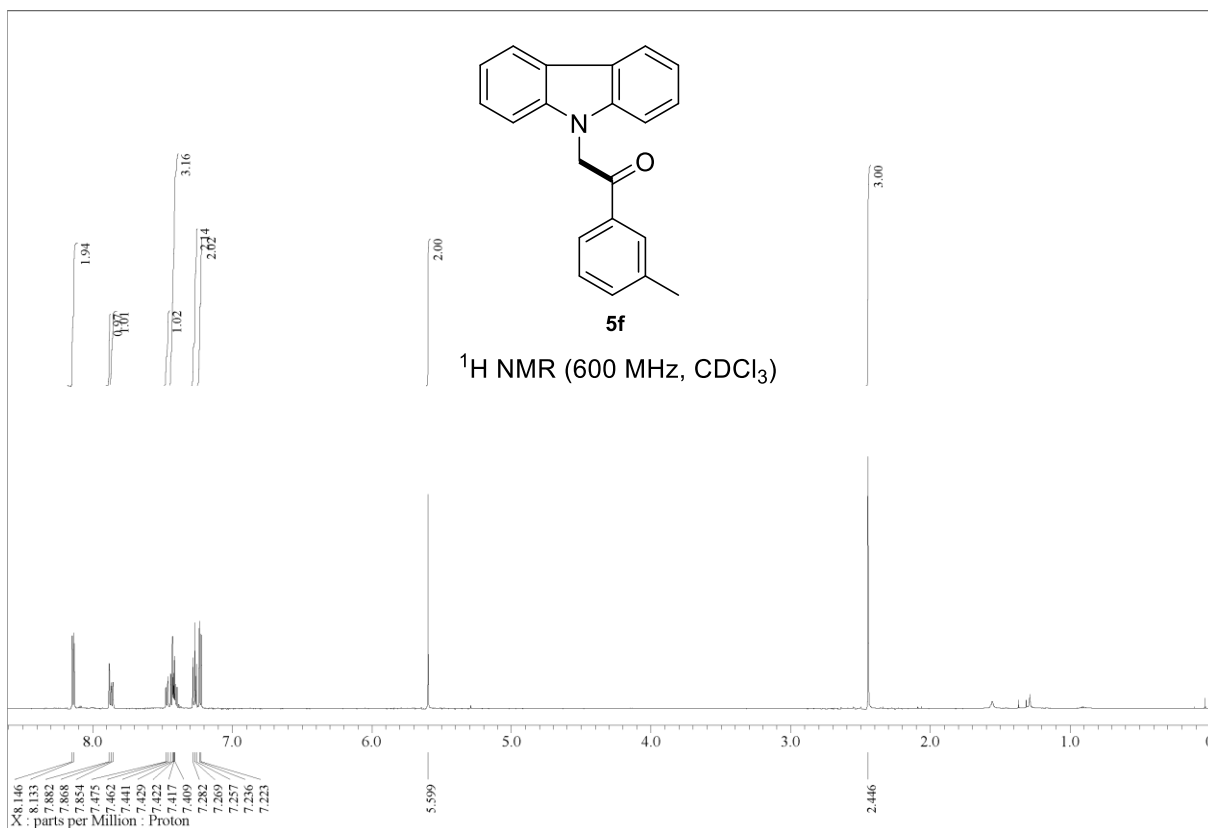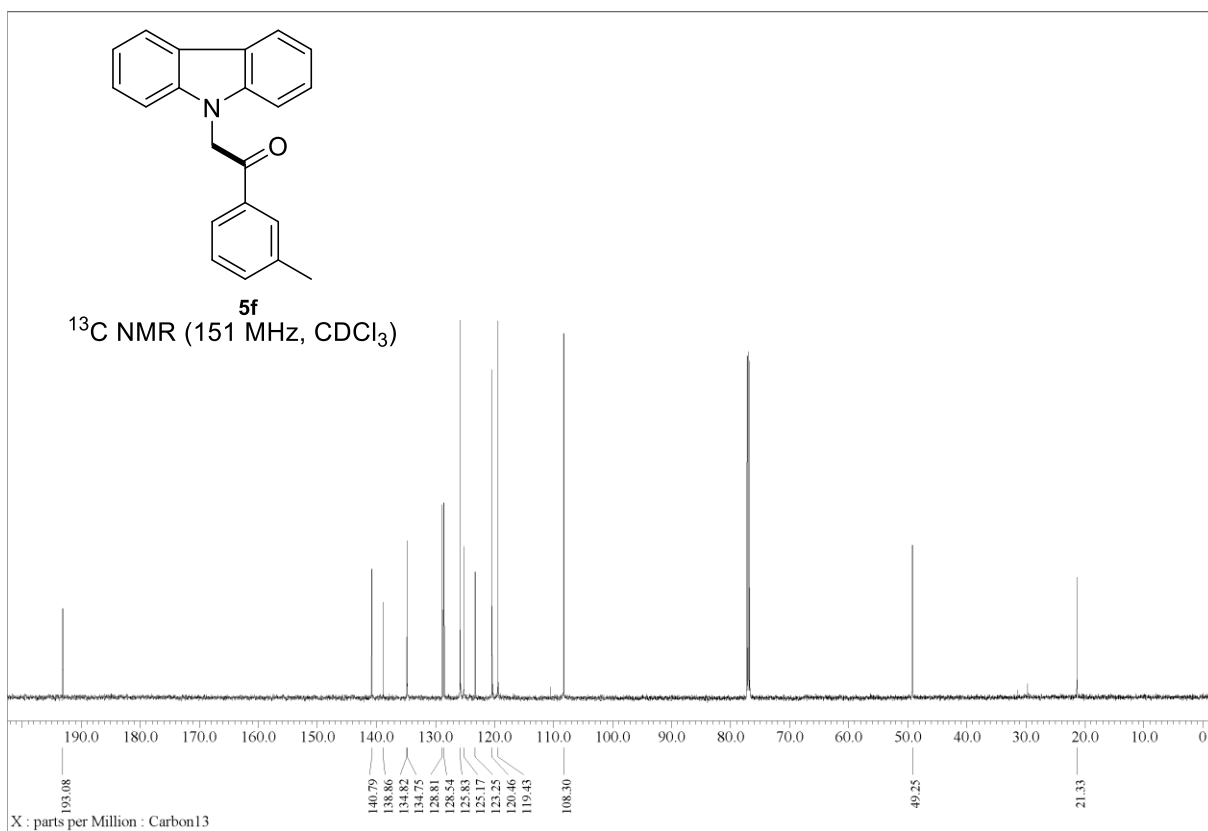

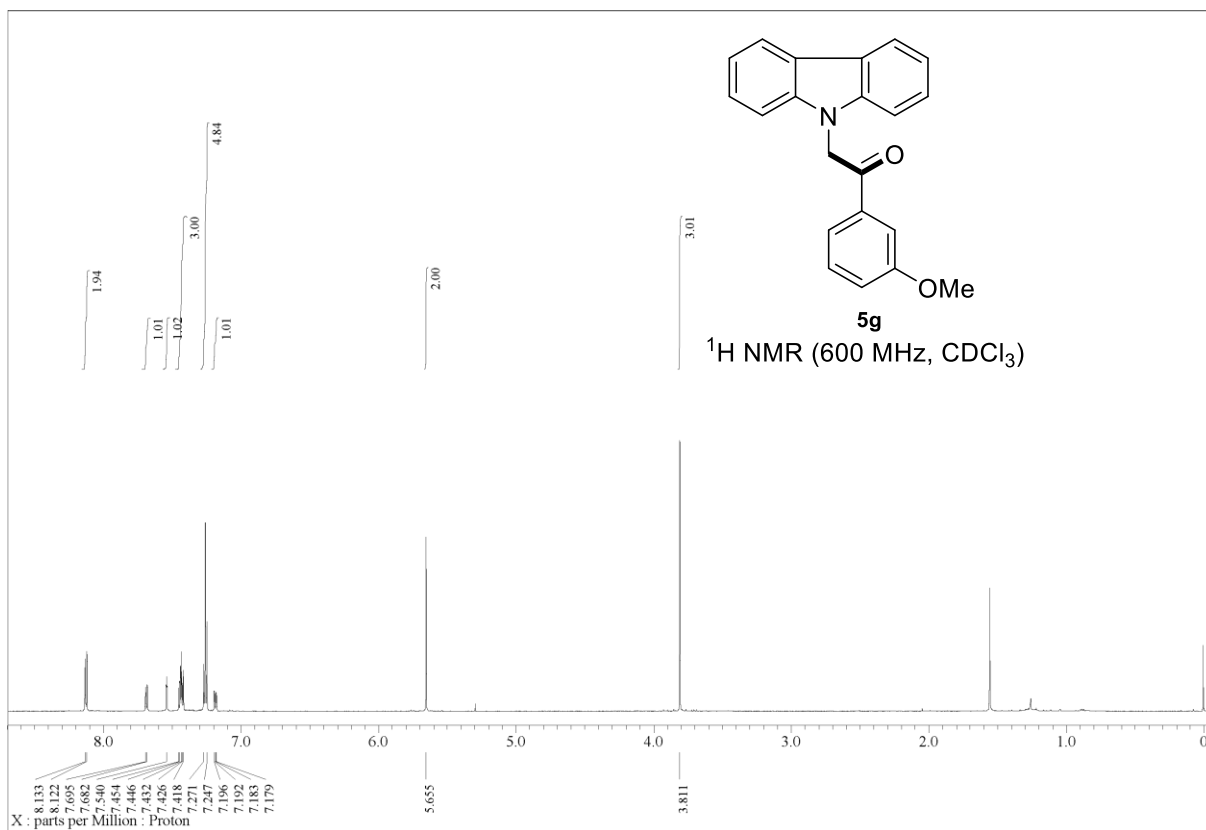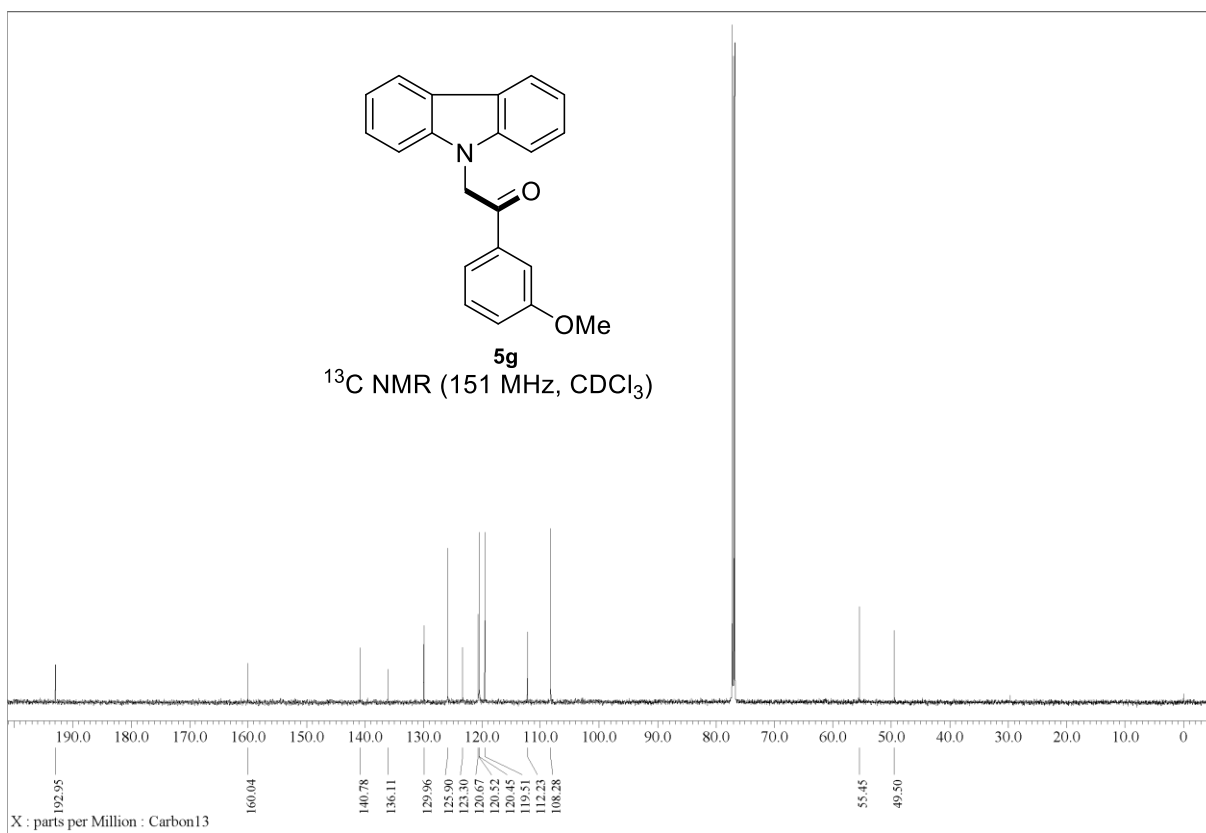

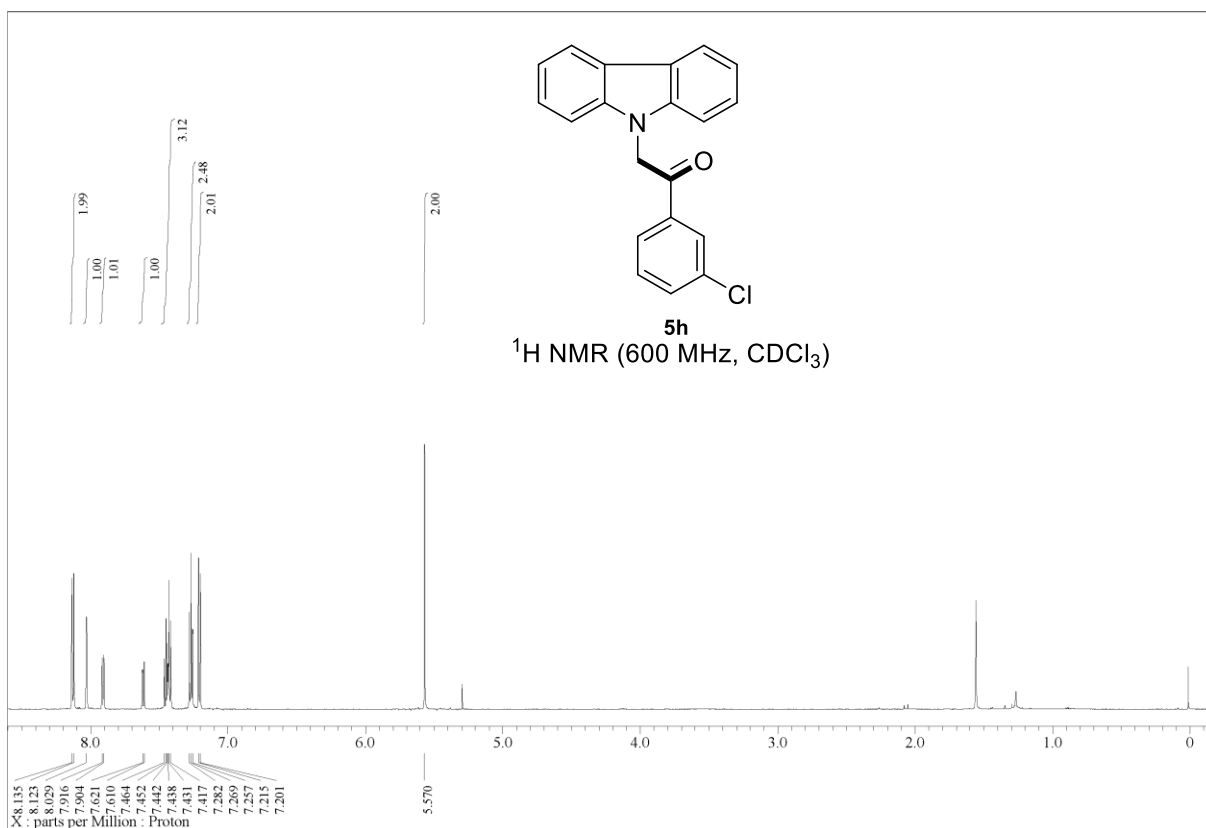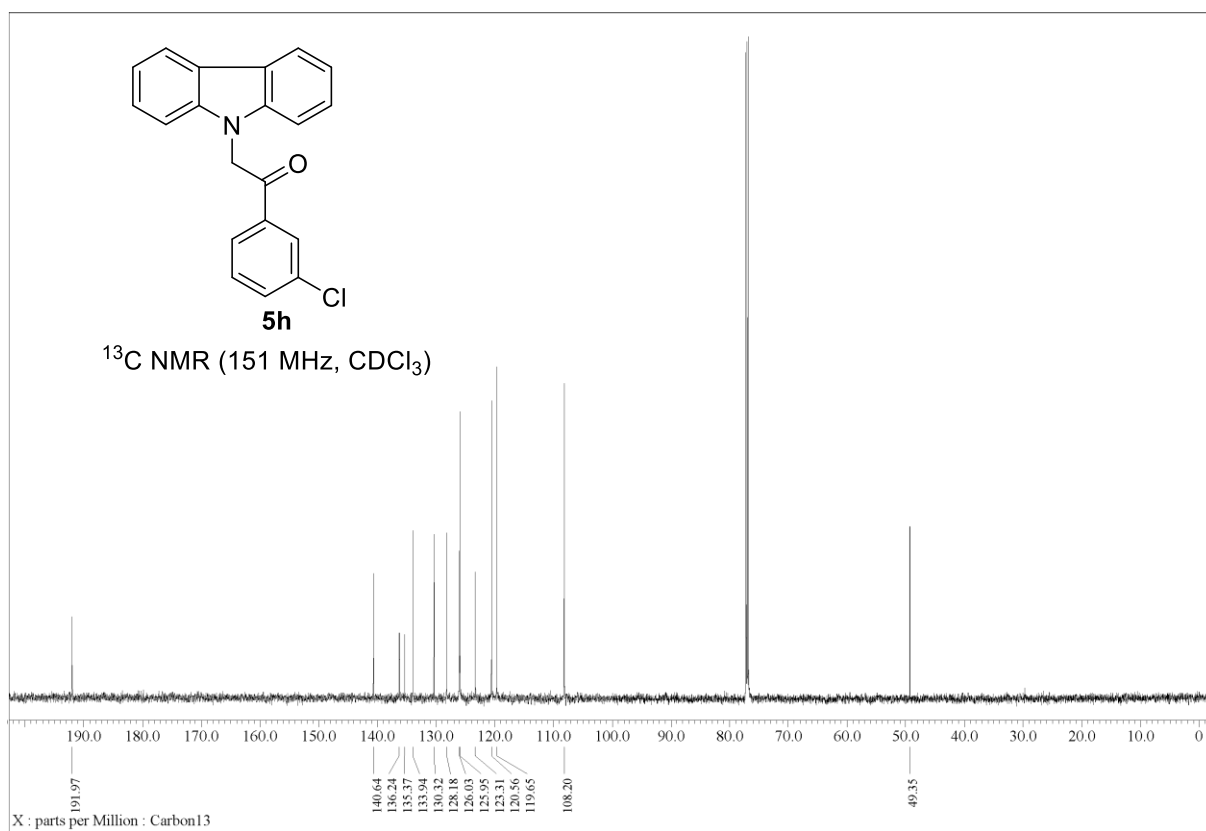

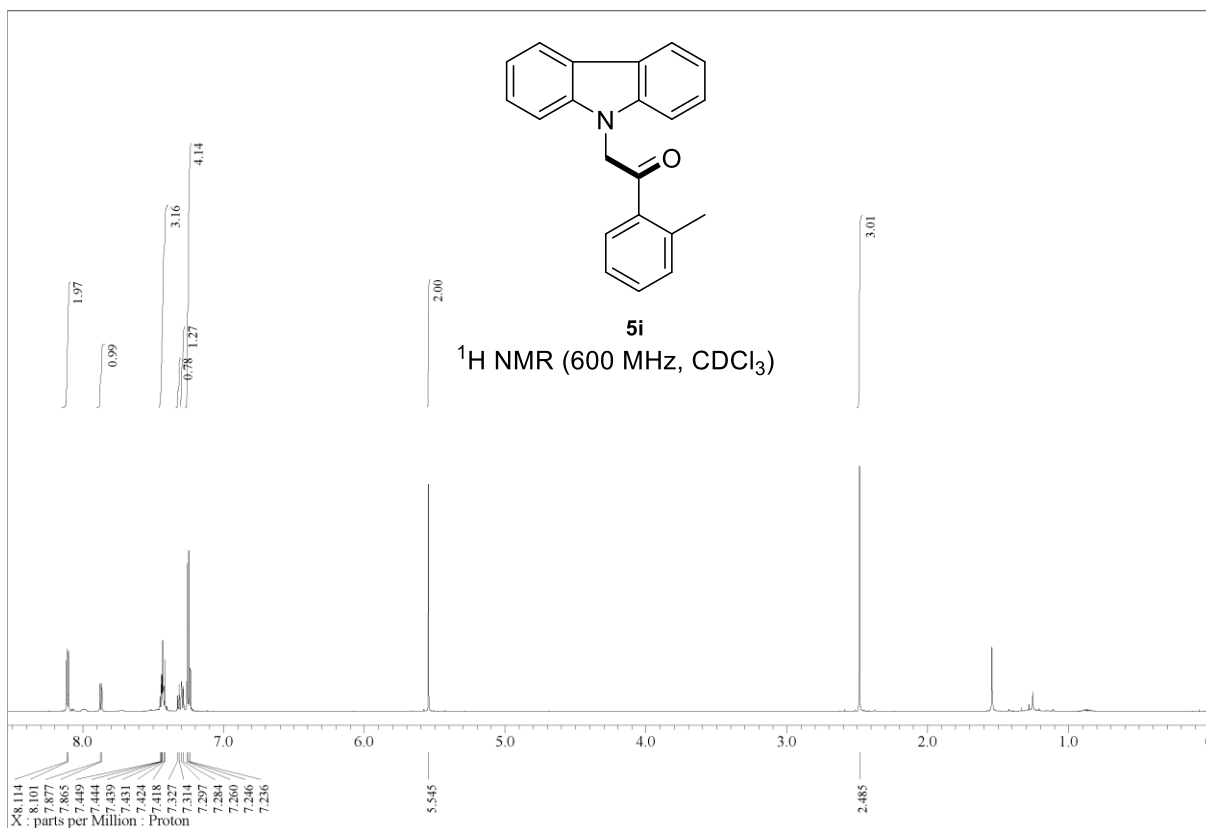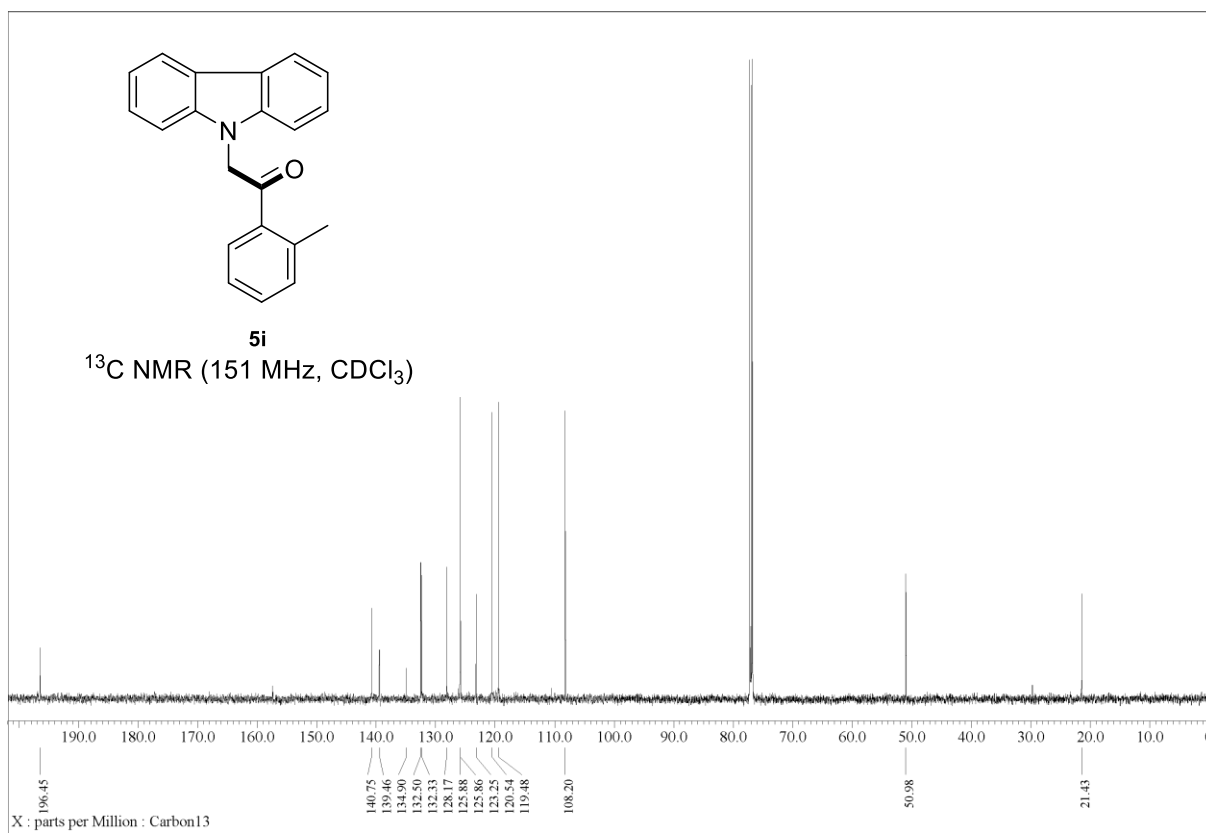

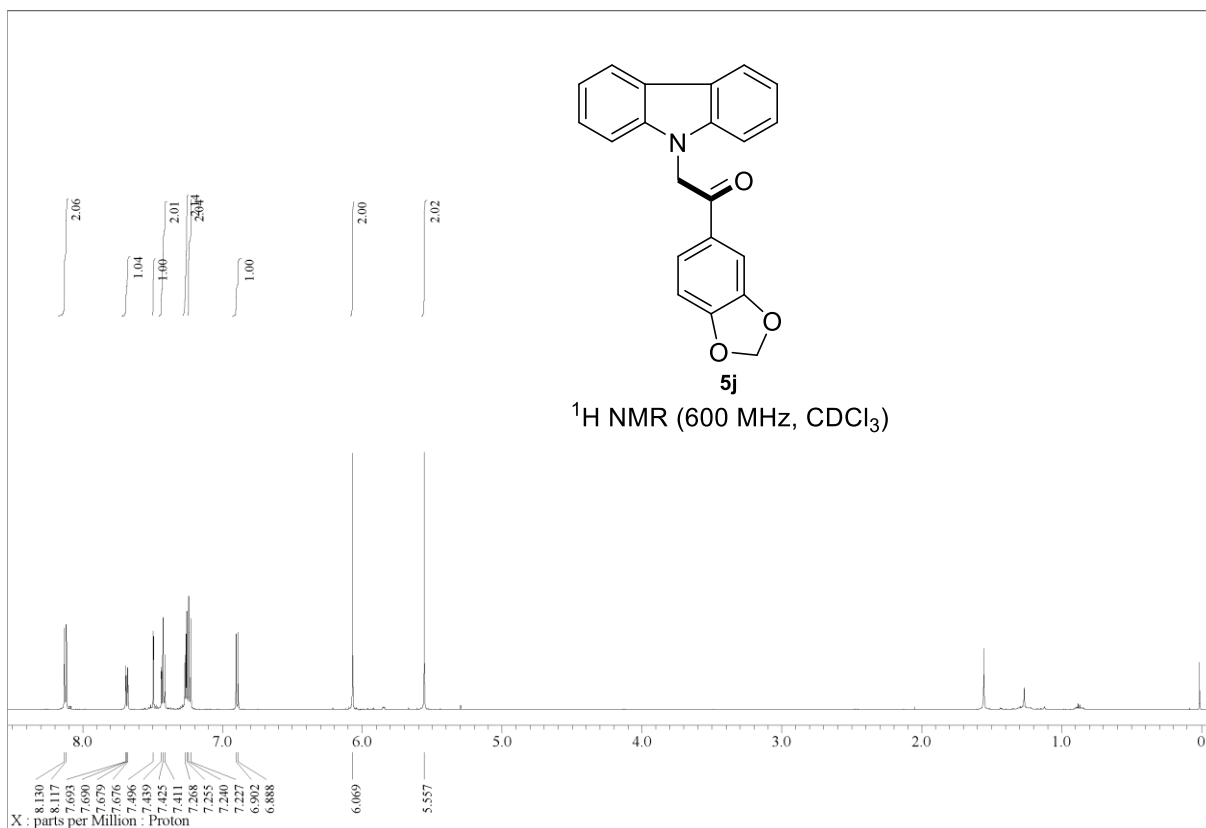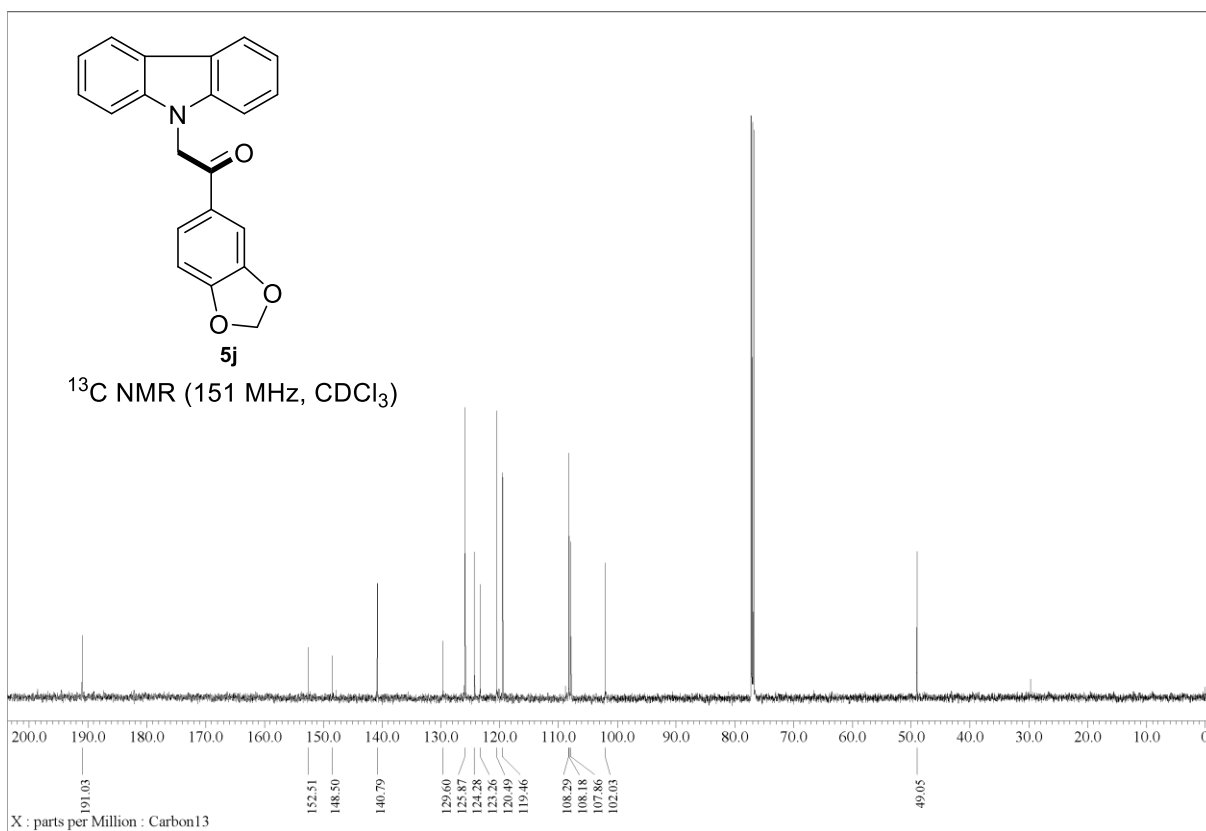

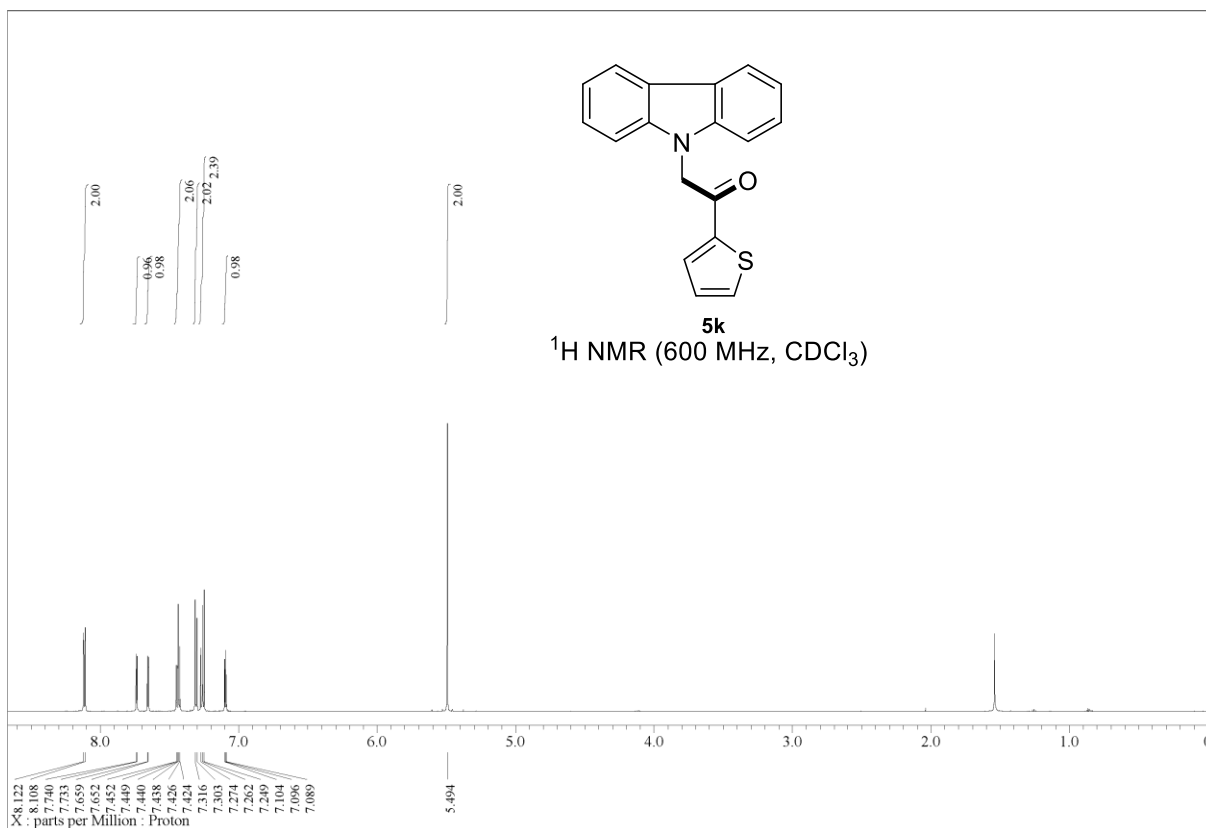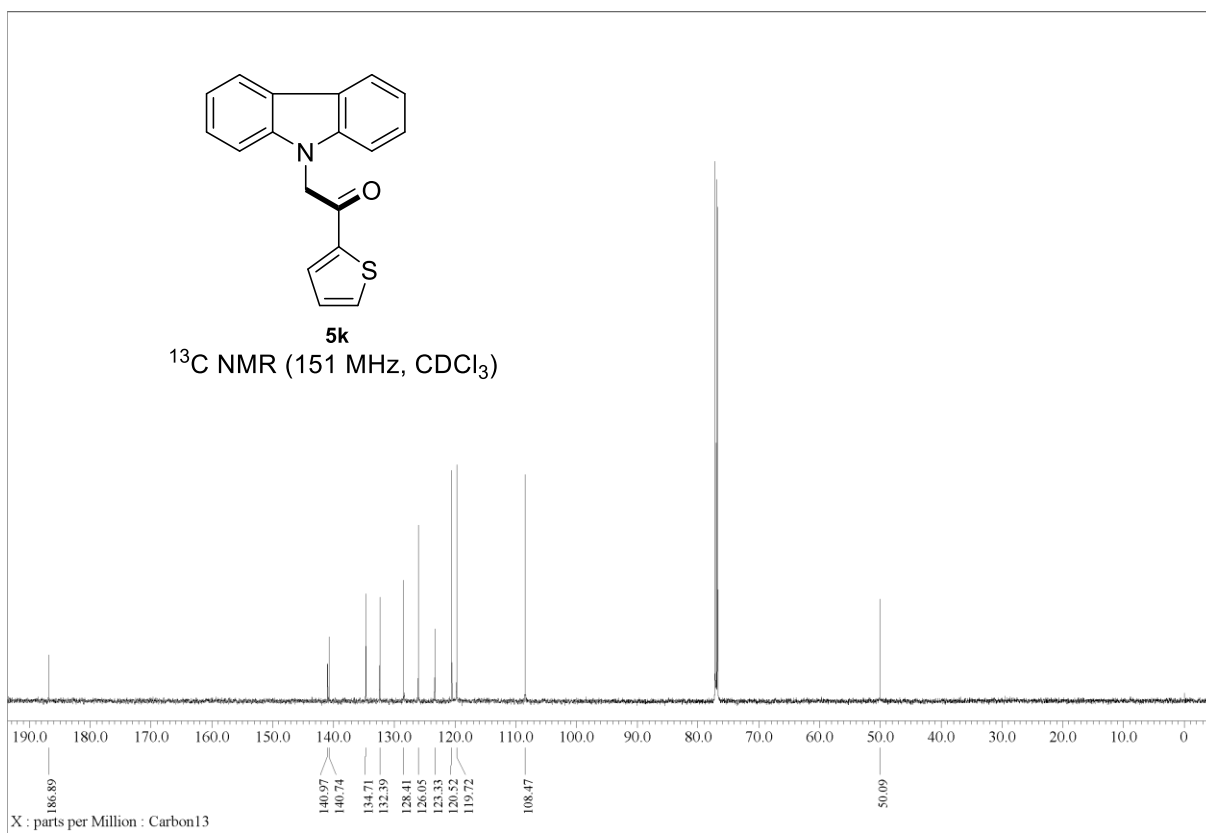

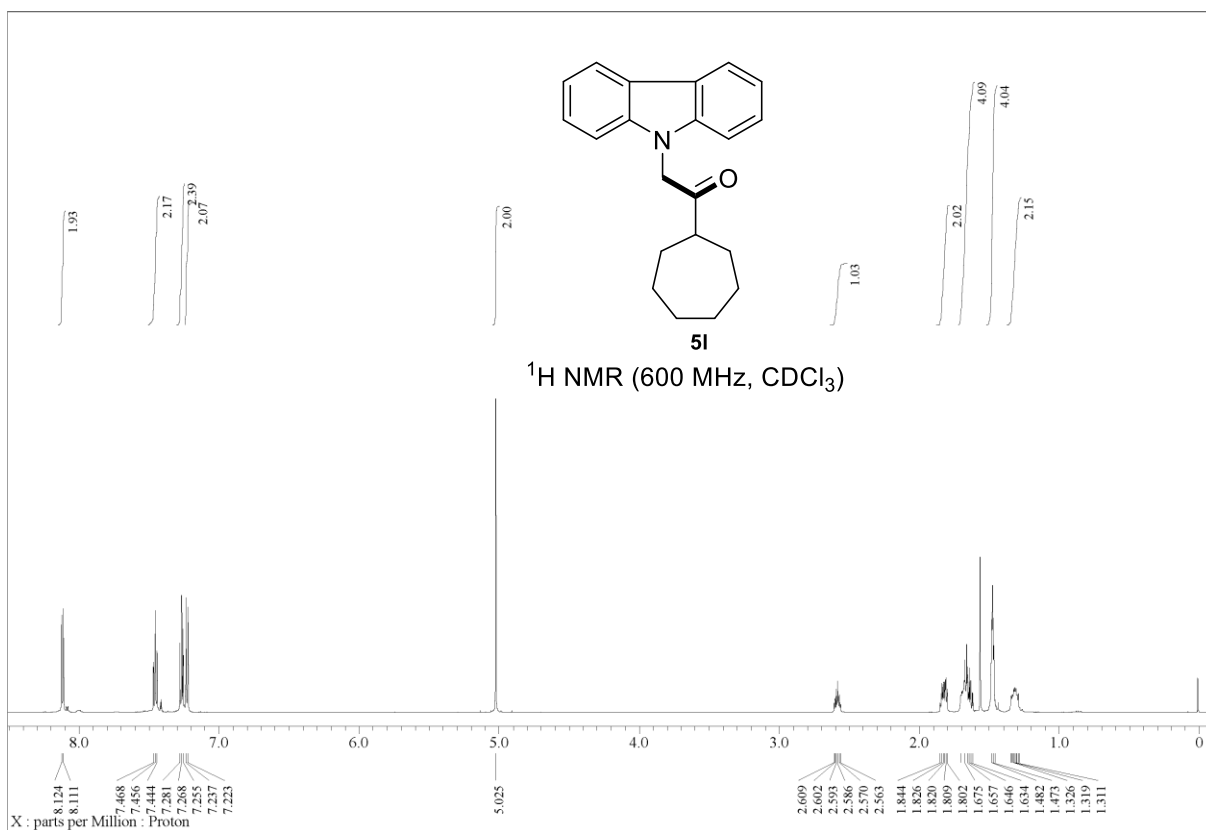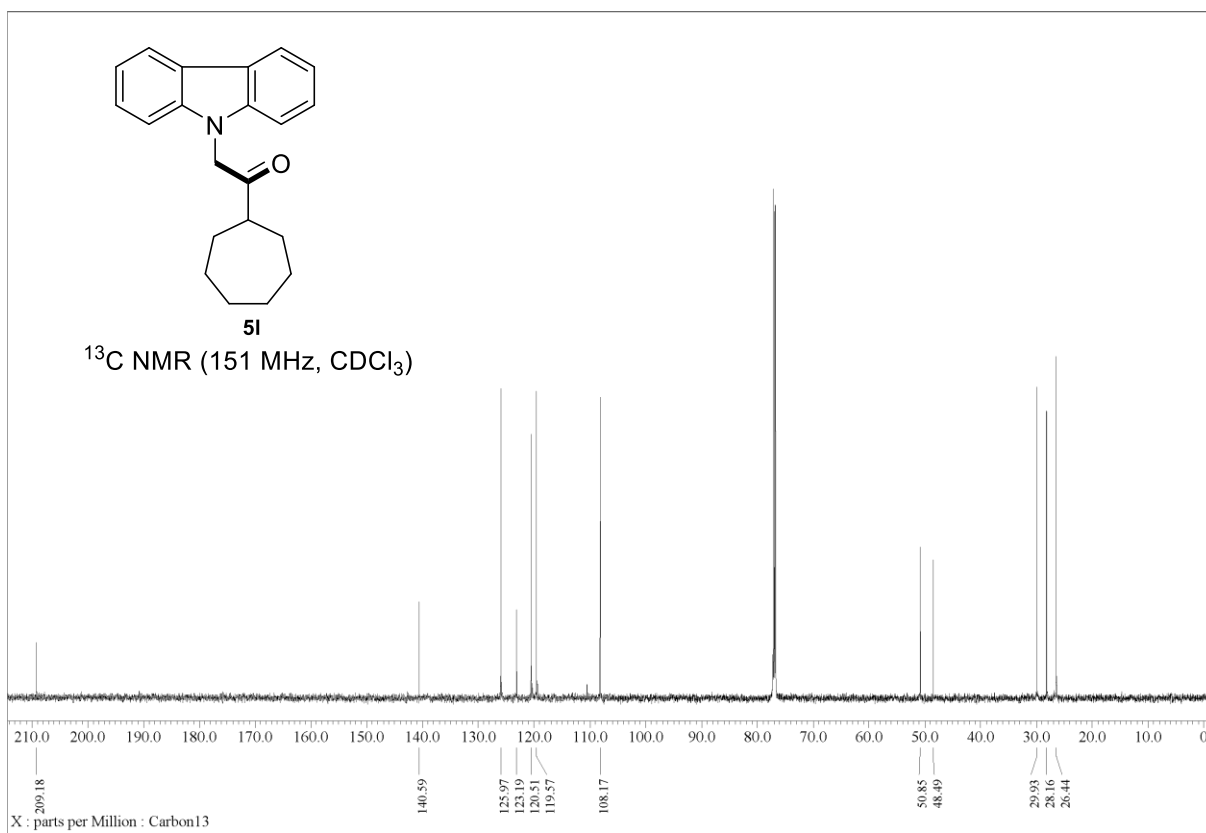



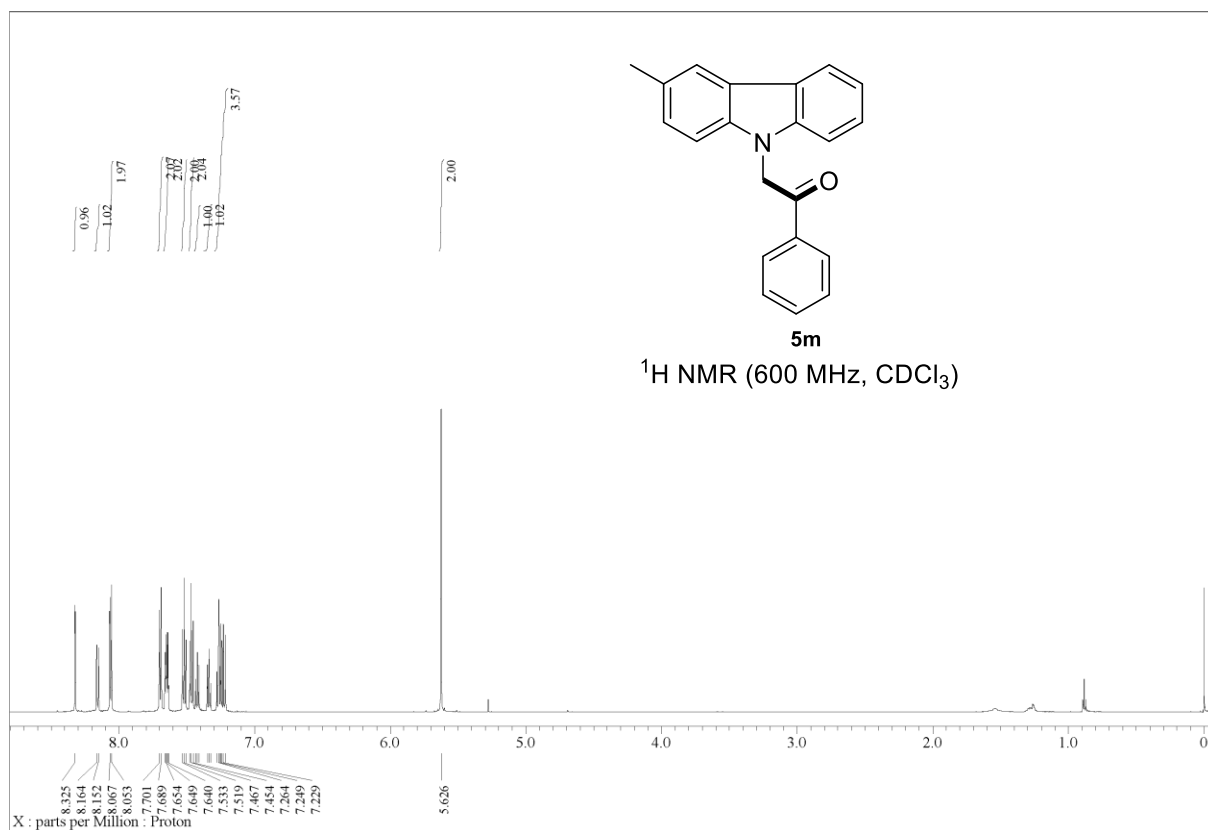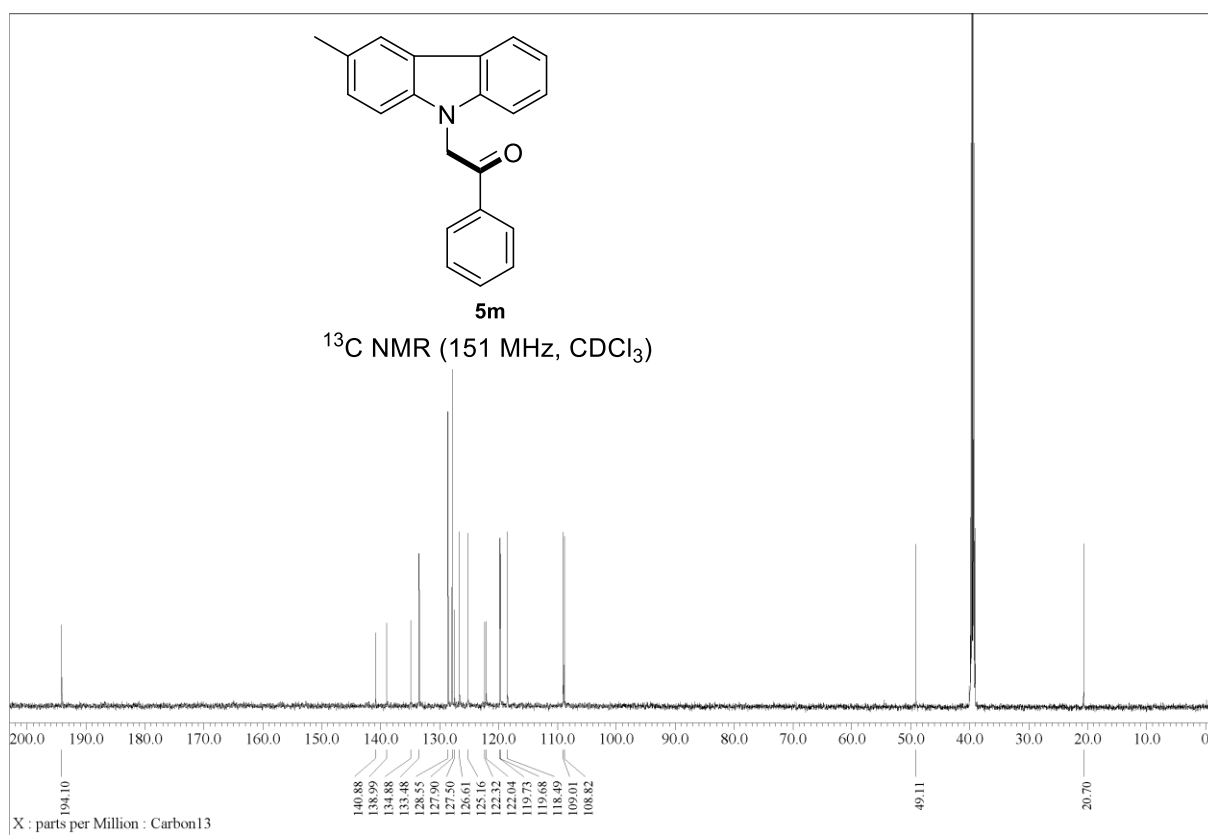

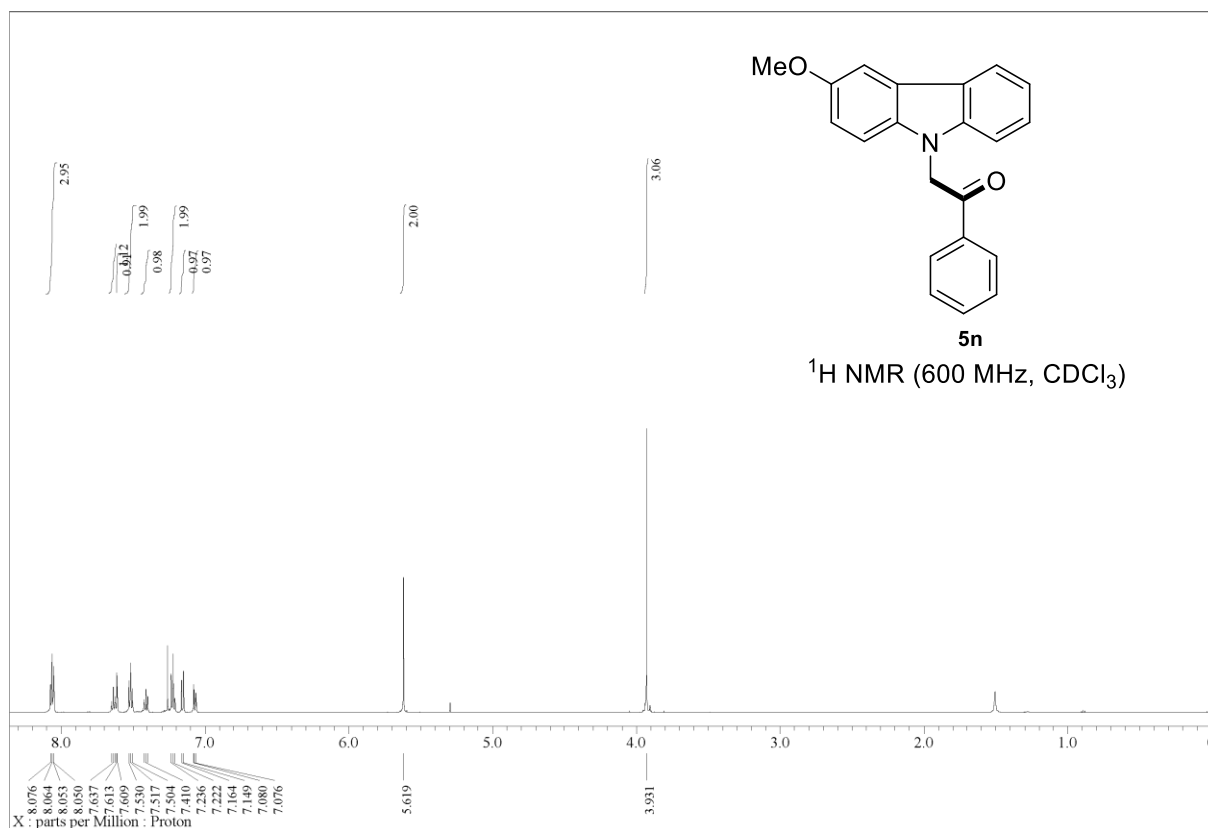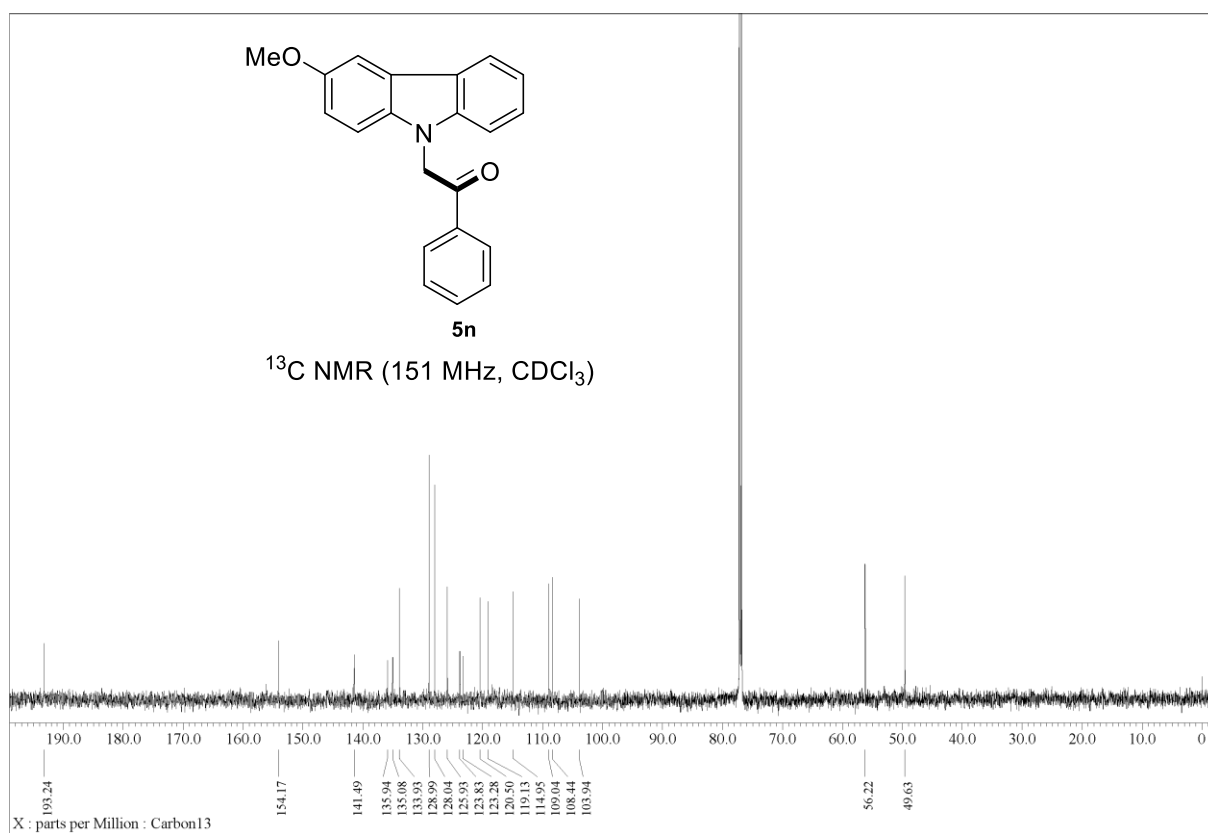

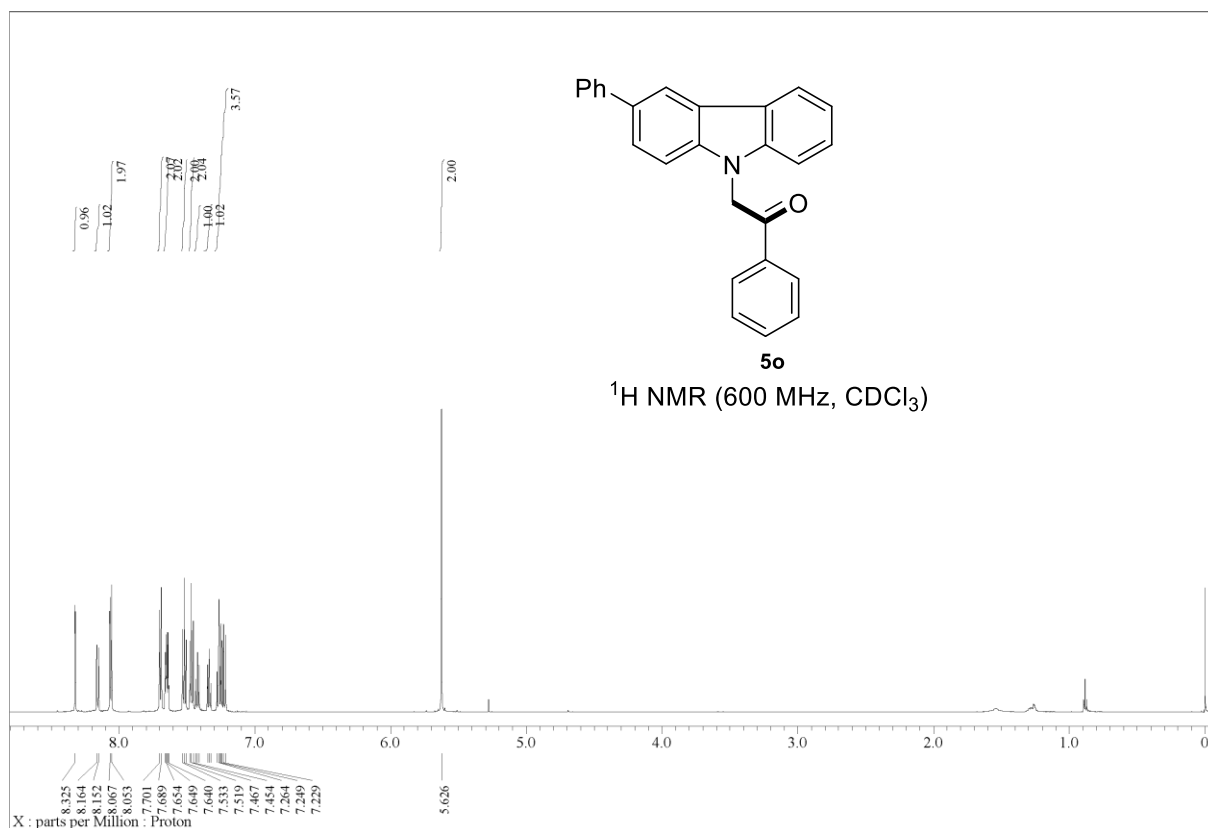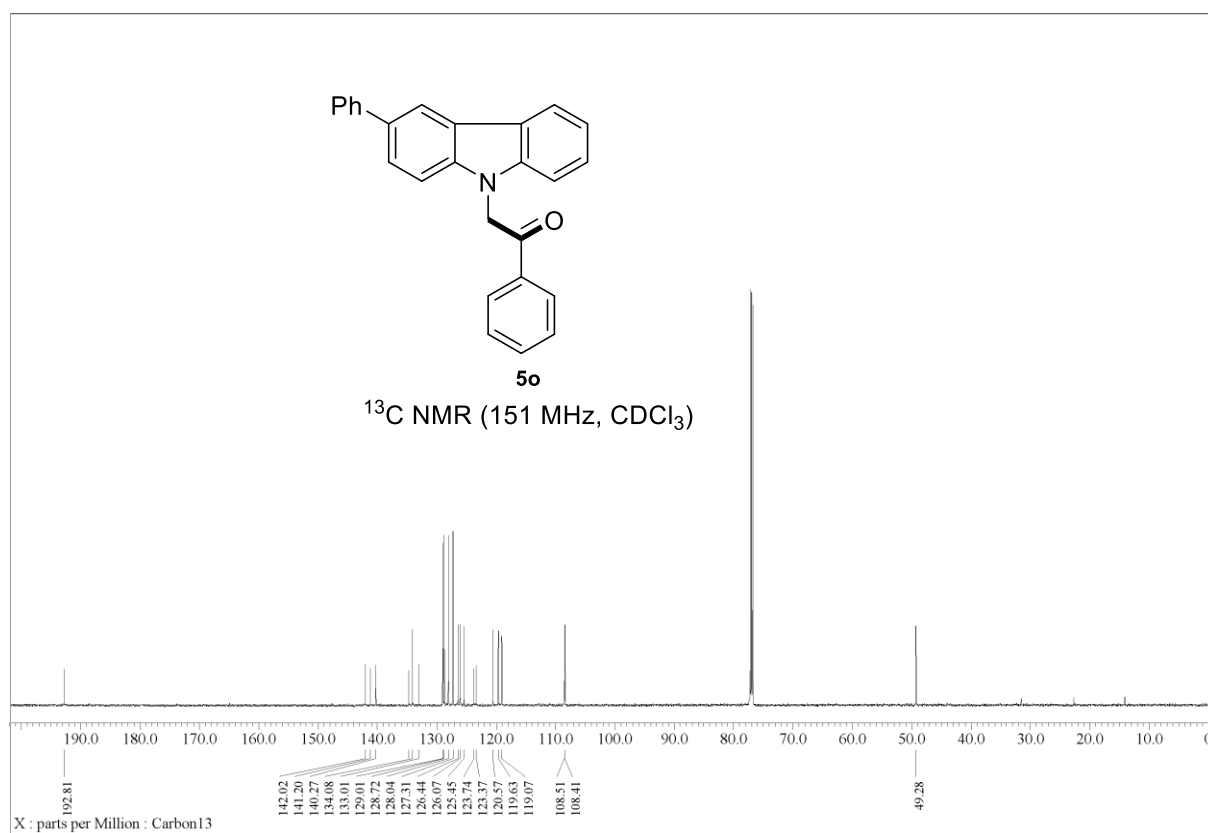

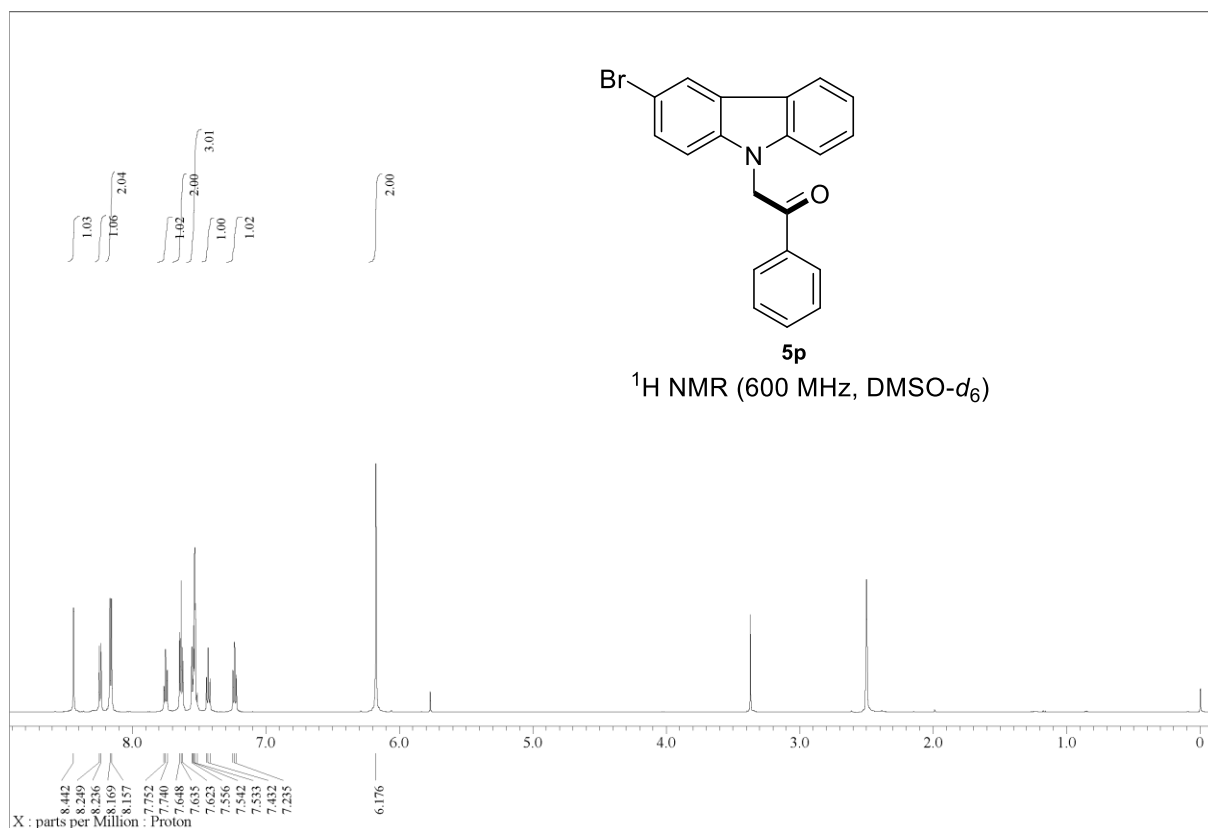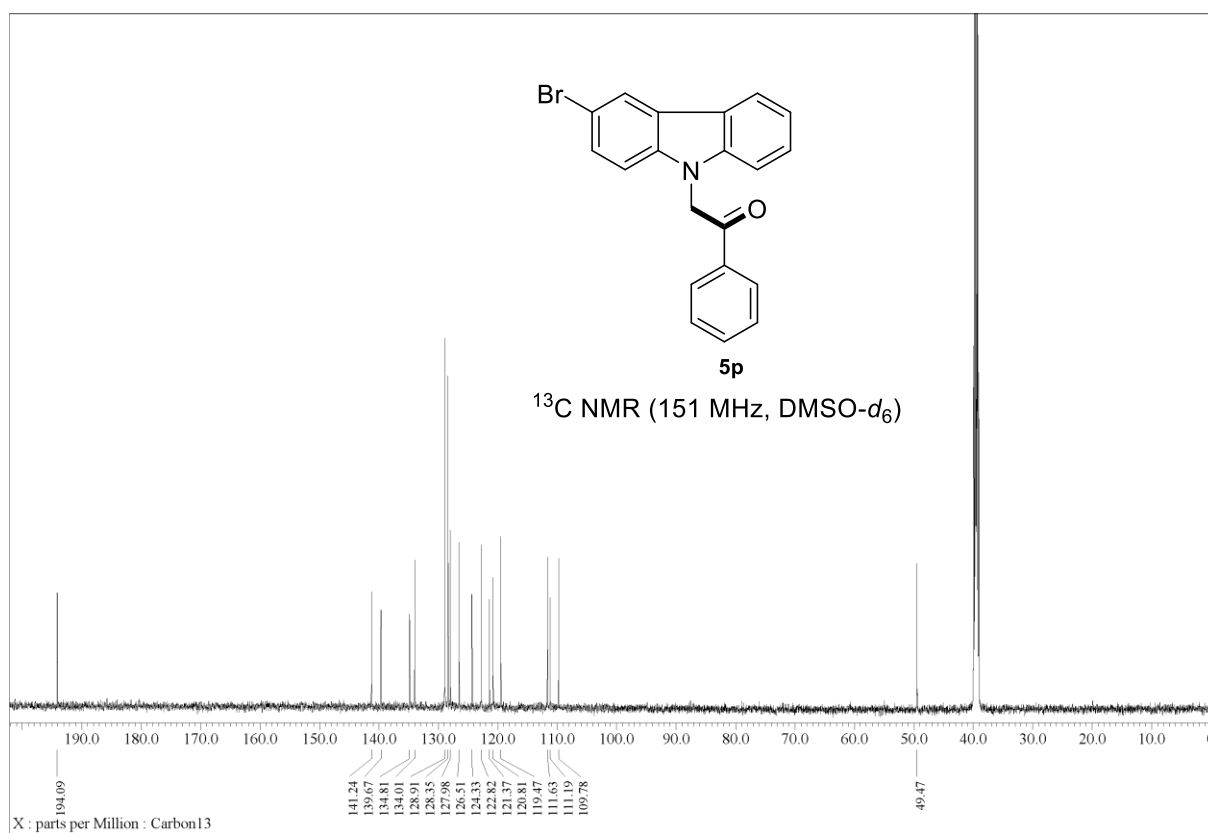

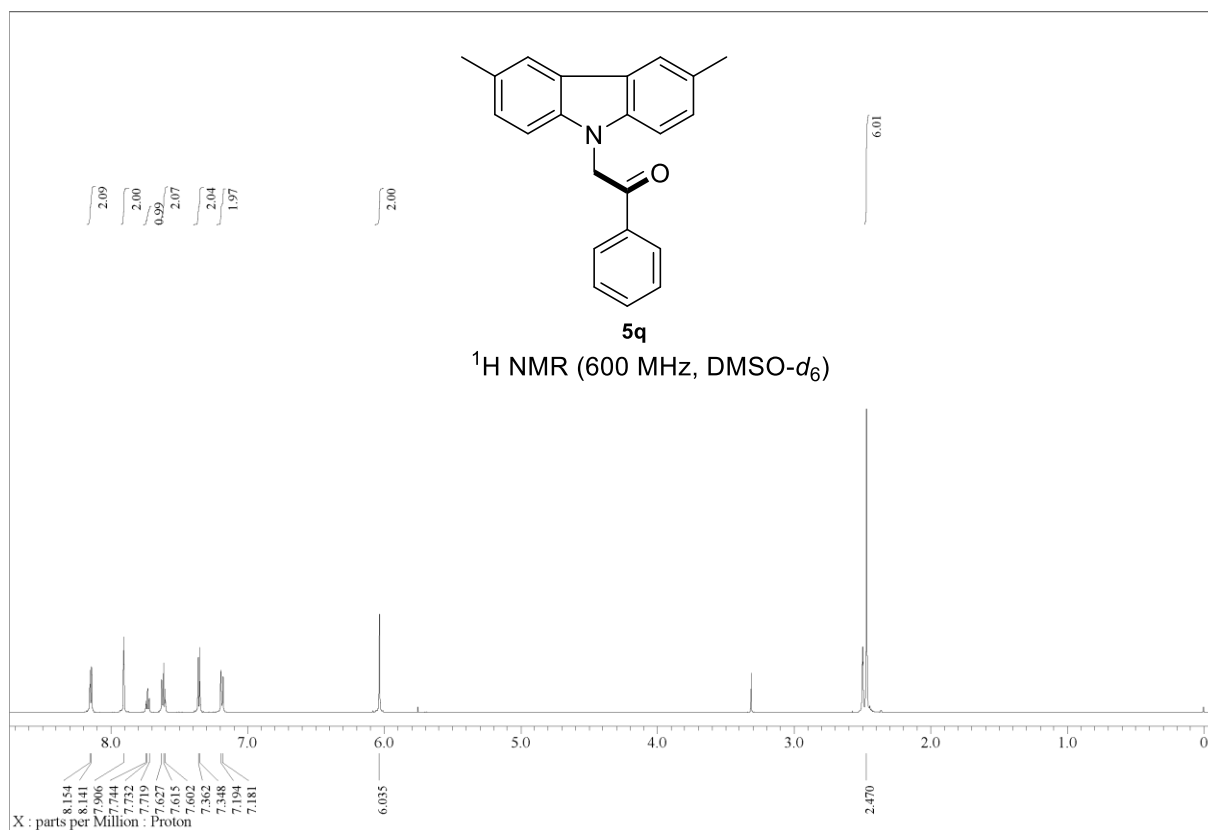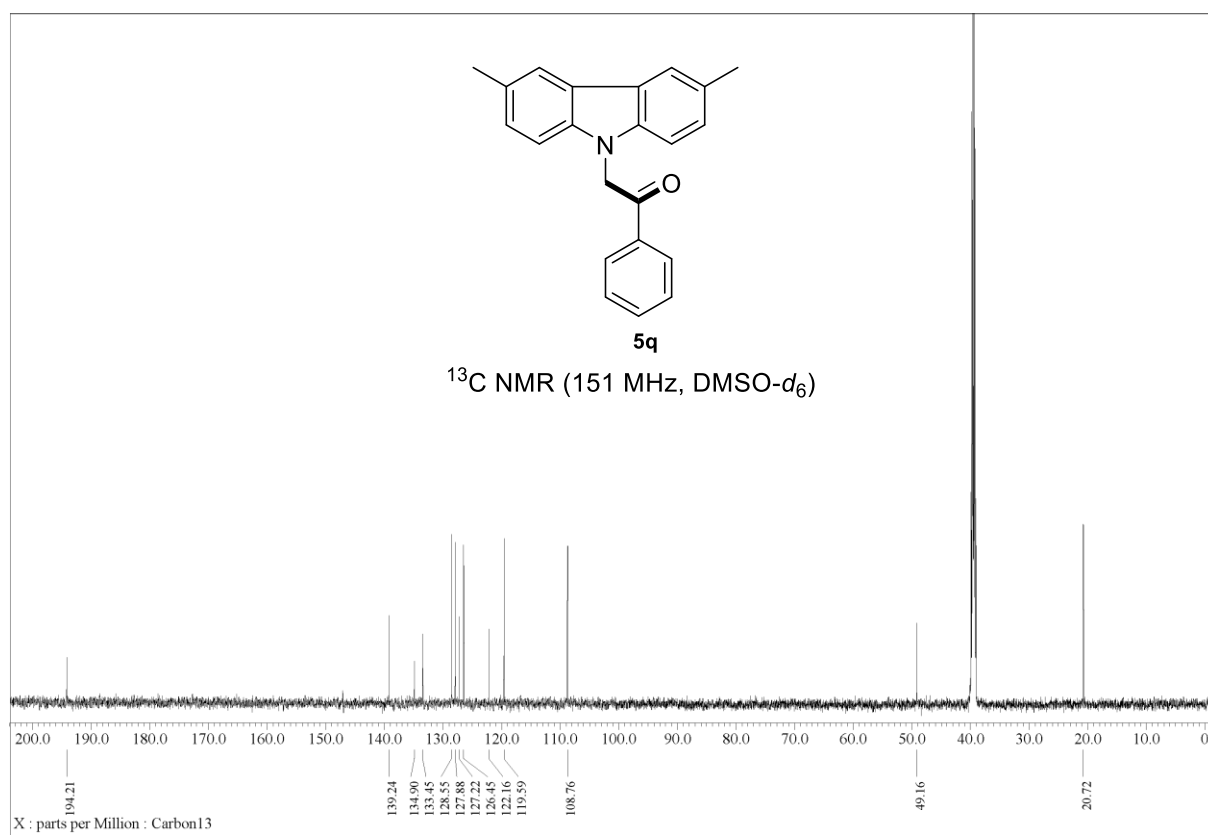

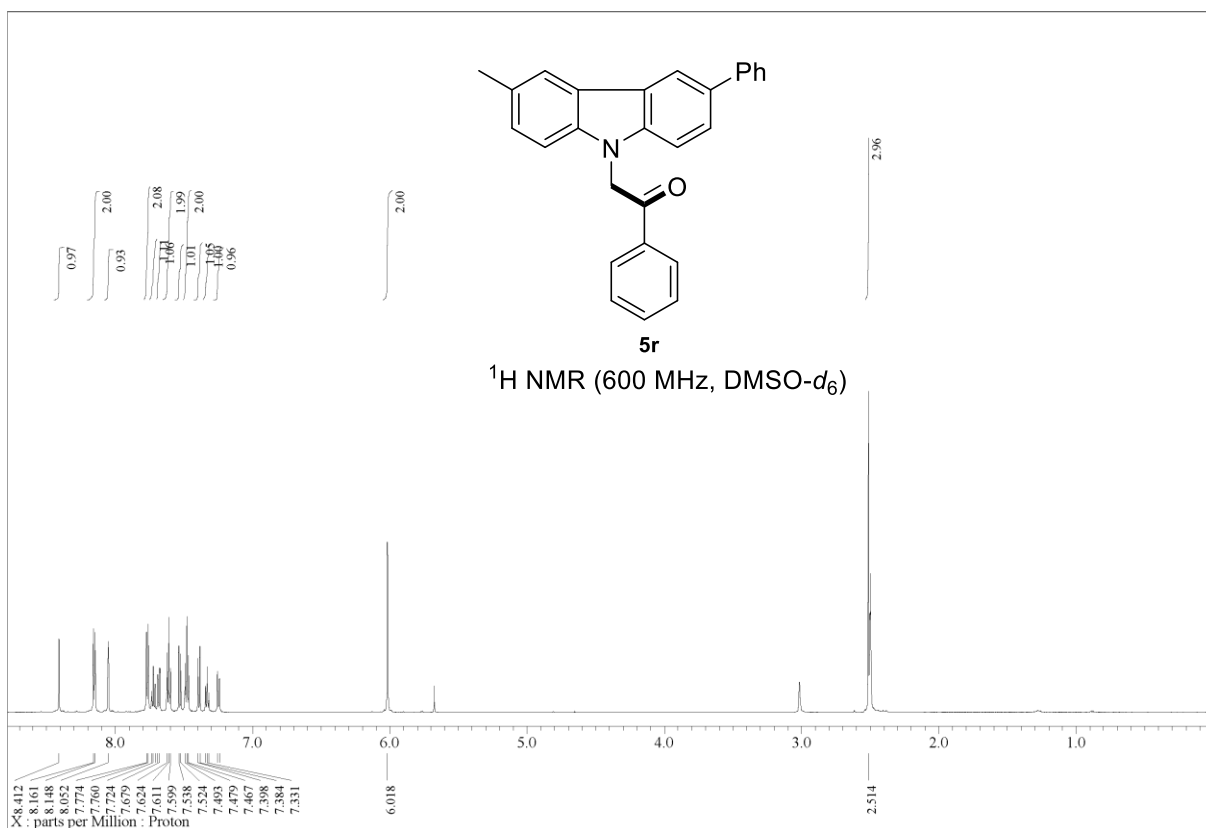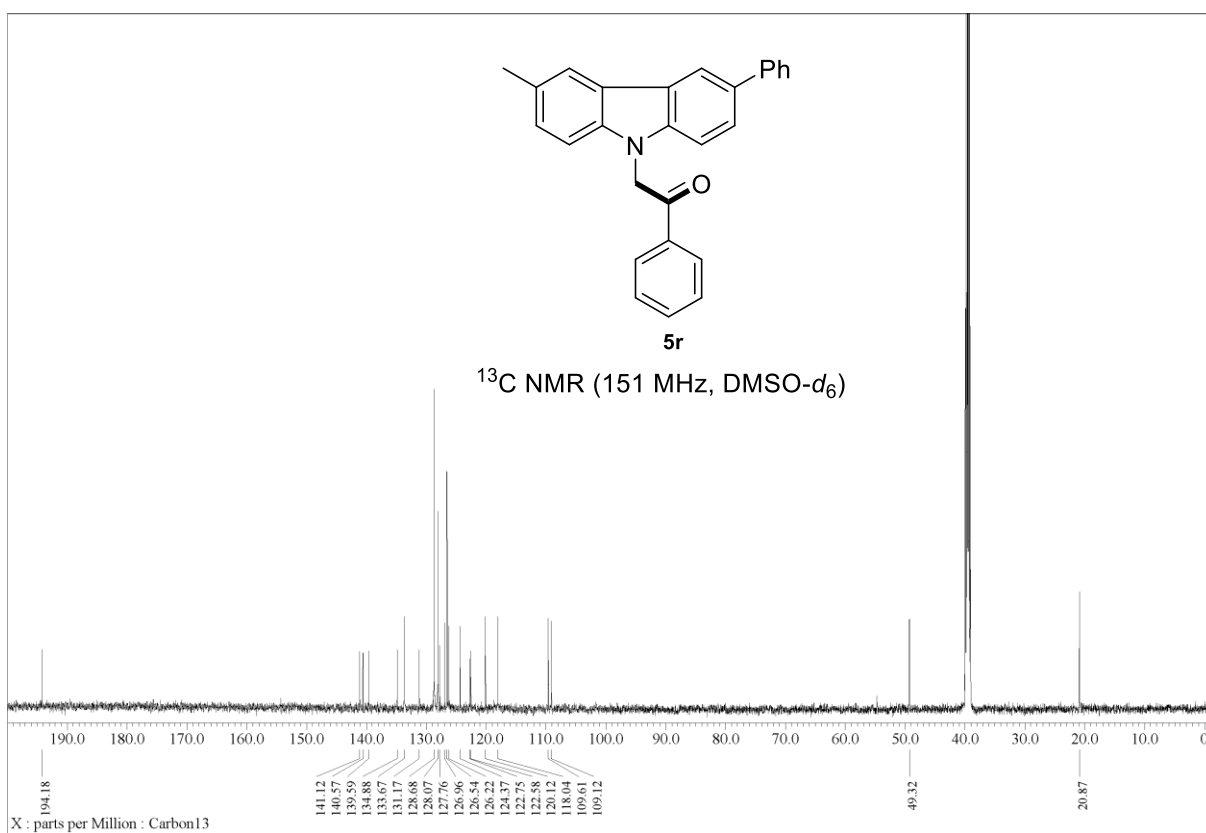

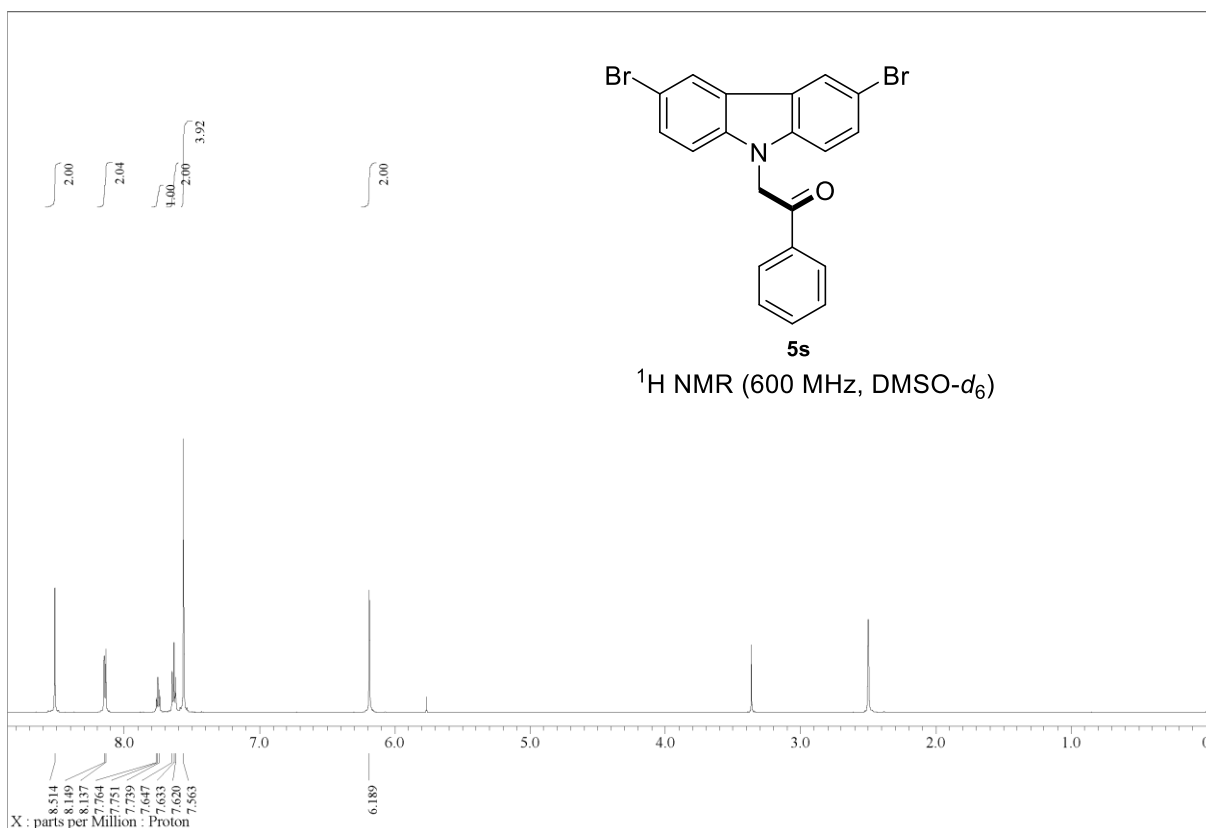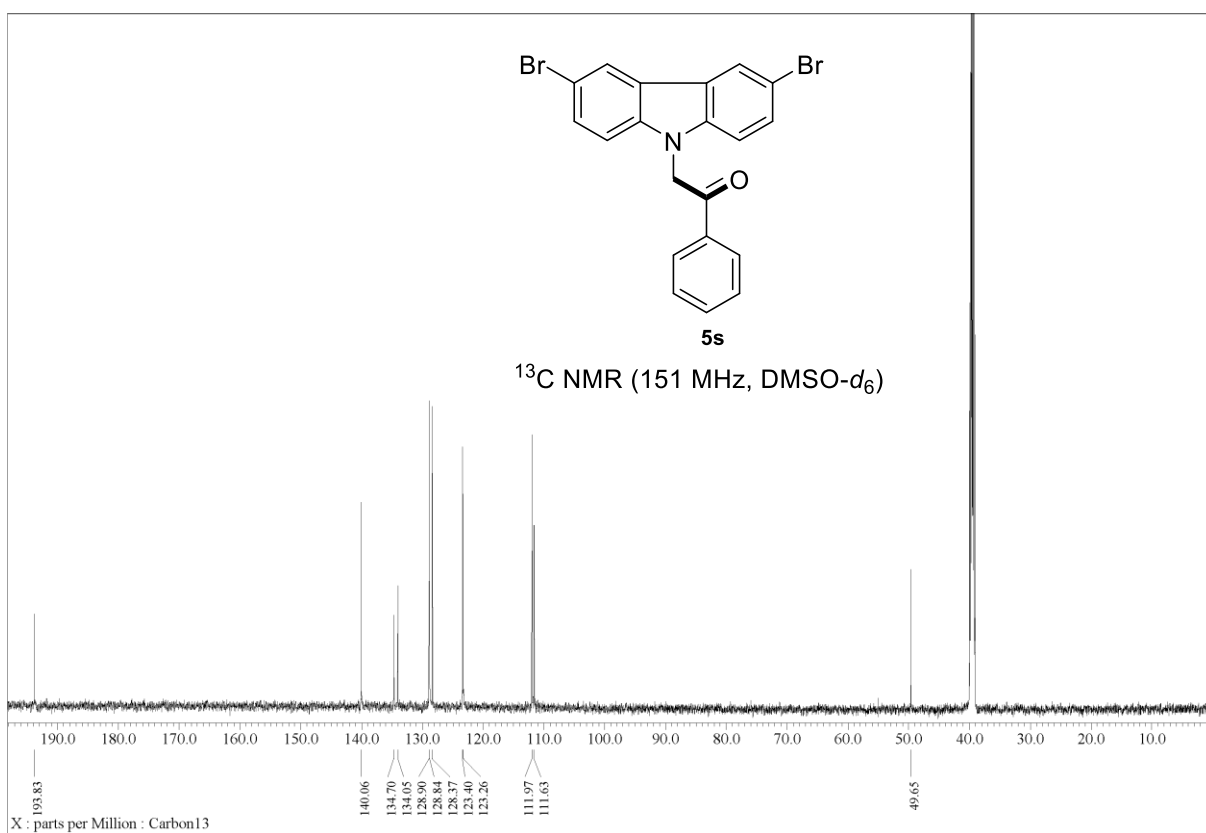

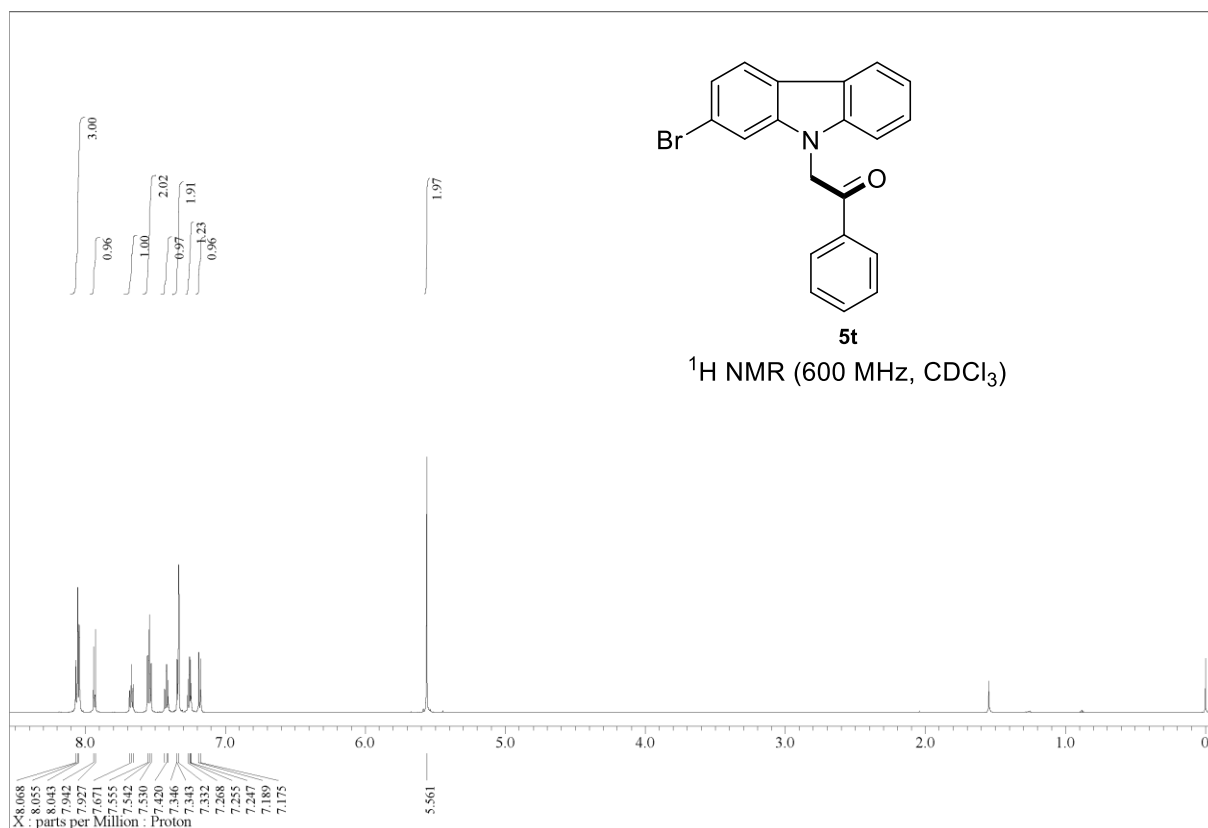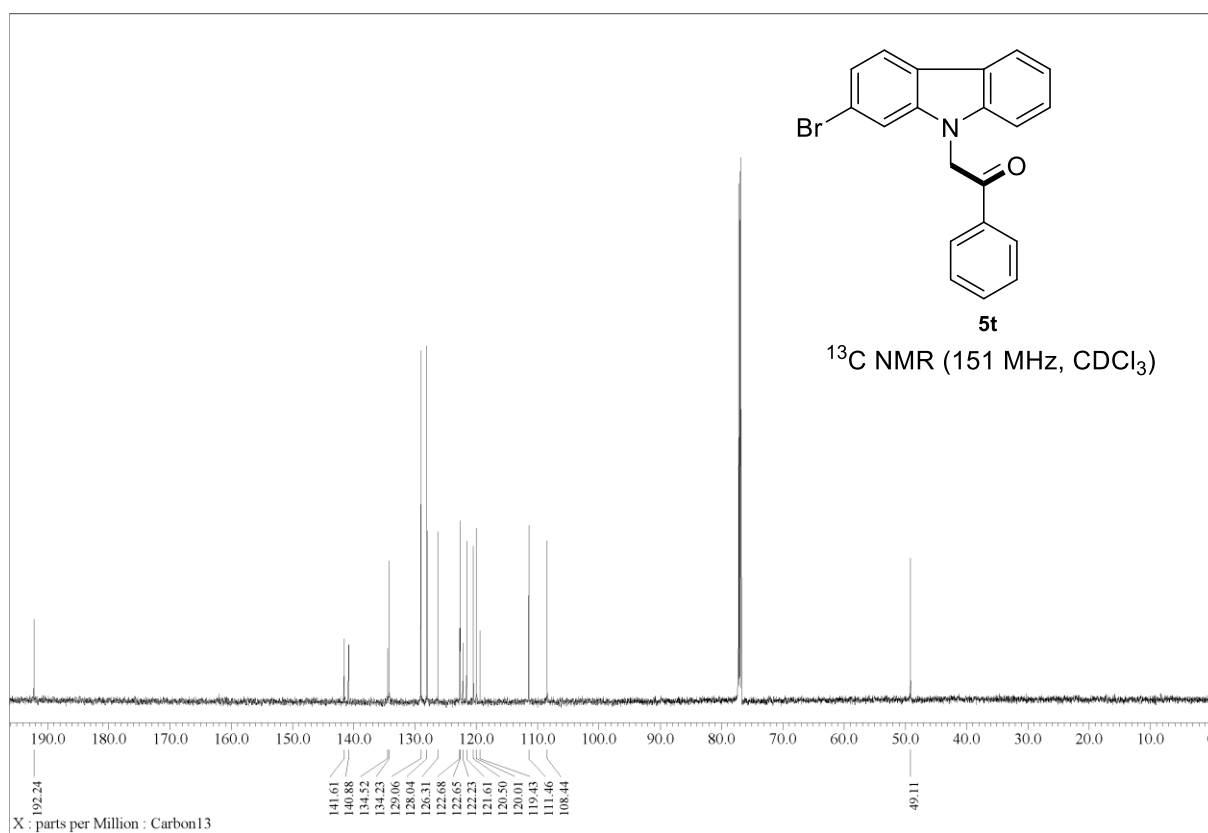



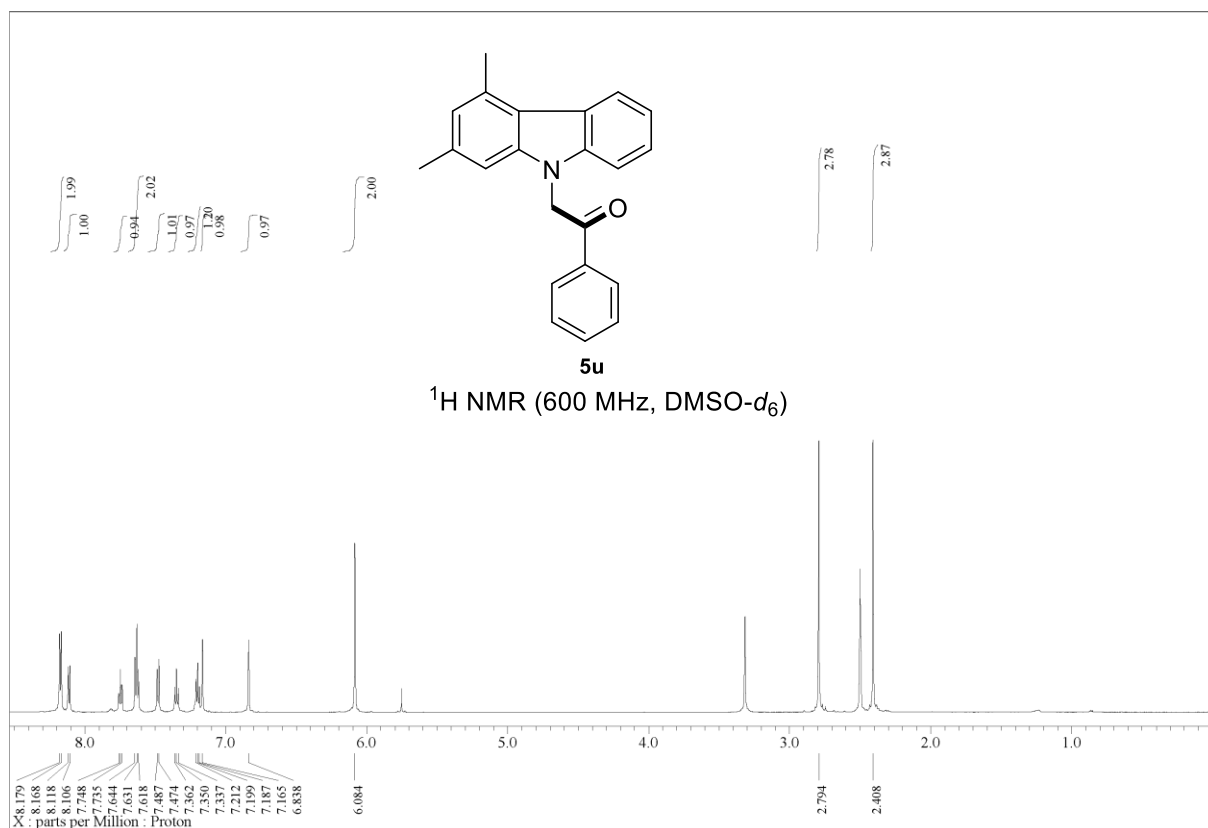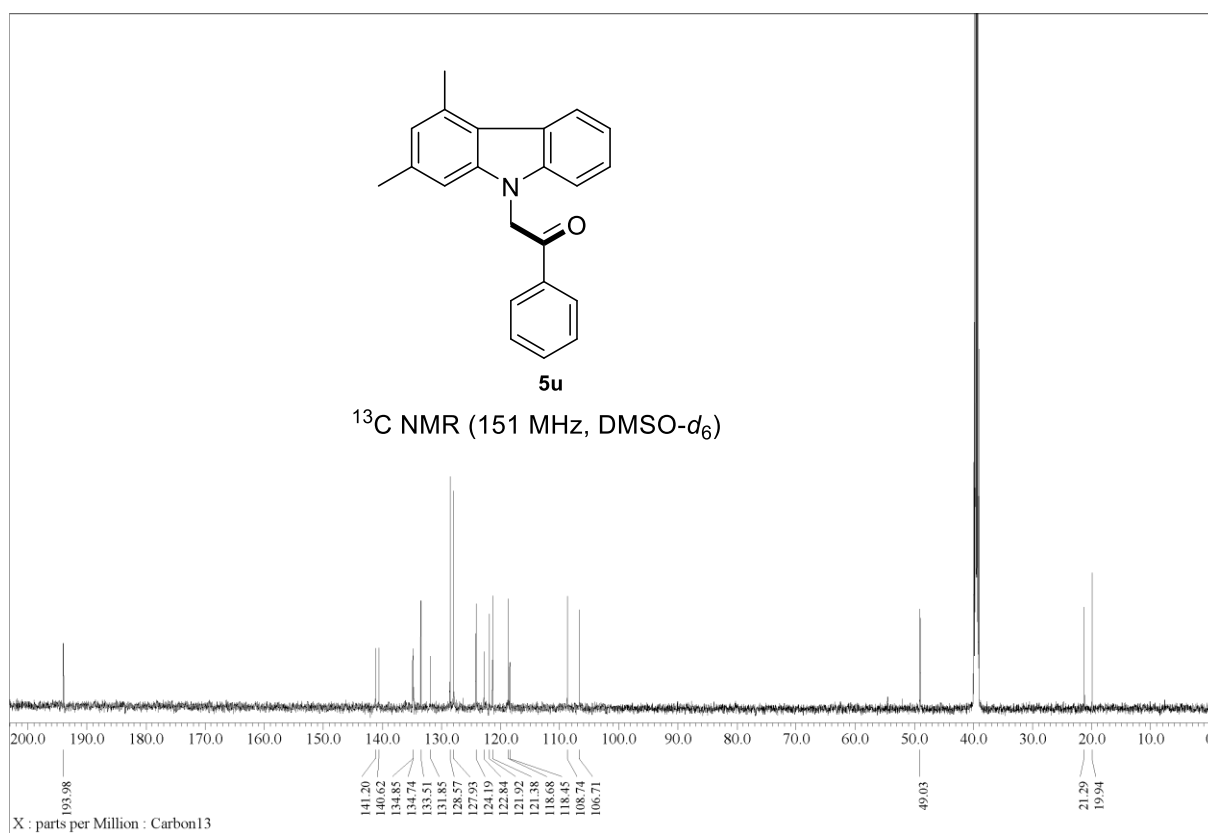

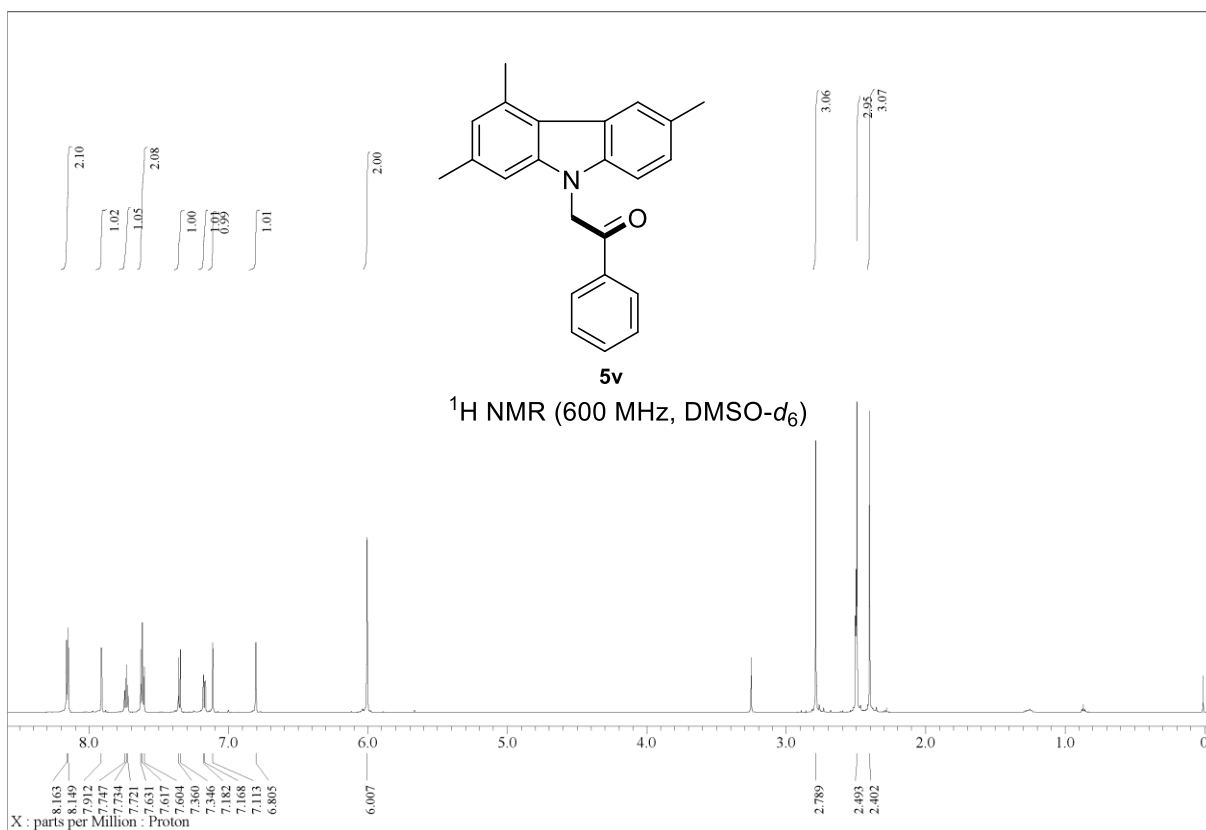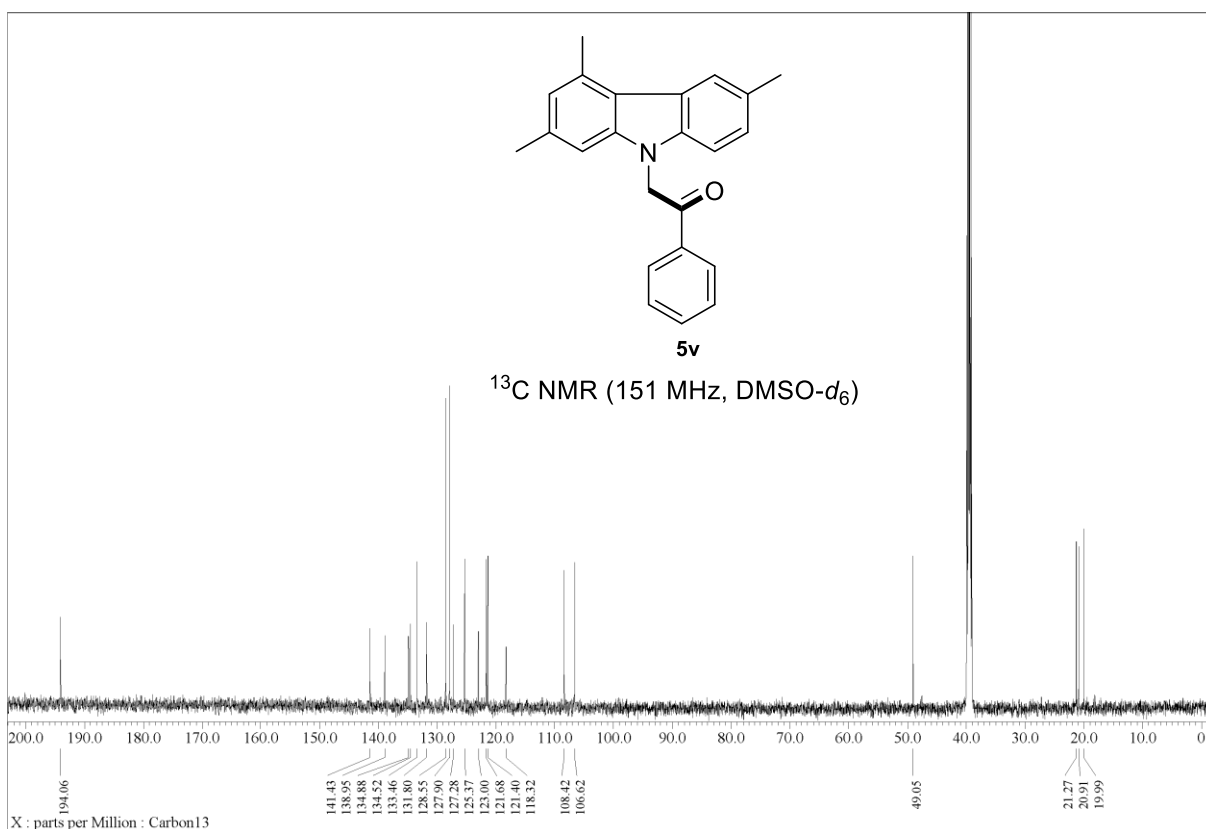

## Cartesian coordinates and energies and of all optimized structures

**PC4** (M06-2X functional)

|                                               |                             |
|-----------------------------------------------|-----------------------------|
| Zero-point correction =                       | 0.734859 (Hartree/Particle) |
| Thermal correction to Energy =                | 0.782542                    |
| Thermal correction to Enthalpy =              | 0.783487                    |
| Thermal correction to Gibbs Free Energy =     | 0.651255                    |
| Sum of electronic and zero-point Energies =   | -2811.052475                |
| Sum of electronic and thermal Energies =      | -2811.004791                |
| Sum of electronic and thermal Enthalpies =    | -2811.003847                |
| Sum of electronic and thermal Free Energies = | -2811.136079                |
| SCF Done =                                    | -2811.78733378              |

**Imaginary frequency:** 0 (cm<sup>-1</sup>)

Standard orientation:

| Center<br>Number | Atomic<br>Number | Atomic<br>Type | Coordinates (Angstroms) |           |           |
|------------------|------------------|----------------|-------------------------|-----------|-----------|
|                  |                  |                | X                       | Y         | Z         |
| 1                | 77               | 0              | -0.041613               | -0.029301 | -0.109937 |
| 2                | 6                | 0              | -2.096962               | 1.943709  | 0.861627  |
| 3                | 6                | 0              | -0.004433               | 2.975363  | 0.975235  |
| 4                | 6                | 0              | -0.543155               | 4.139471  | 1.502270  |
| 5                | 6                | 0              | -1.919429               | 4.188794  | 1.711915  |
| 6                | 6                | 0              | -2.701347               | 3.087875  | 1.391808  |
| 7                | 1                | 0              | 1.061546                | 2.874040  | 0.789591  |
| 8                | 1                | 0              | 0.100150                | 4.977714  | 1.742020  |
| 9                | 1                | 0              | -2.380634               | 5.079935  | 2.125596  |
| 10               | 1                | 0              | -3.771751               | 3.115417  | 1.556534  |
| 11               | 6                | 0              | -2.807203               | 0.703601  | 0.483977  |
| 12               | 6                | 0              | -4.197118               | 0.583730  | 0.609978  |
| 13               | 6                | 0              | -2.017009               | -0.370681 | -0.000983 |
| 14               | 6                | 0              | -4.833915               | -0.600445 | 0.260538  |
| 15               | 6                | 0              | -2.692649               | -1.550092 | -0.347132 |
| 16               | 6                | 0              | -4.075878               | -1.668471 | -0.218274 |
| 17               | 1                | 0              | -5.911149               | -0.689187 | 0.359793  |

|    |   |   |           |           |           |
|----|---|---|-----------|-----------|-----------|
| 18 | 1 | 0 | -2.126458 | -2.400058 | -0.719365 |
| 19 | 7 | 0 | -0.759720 | 1.915519  | 0.664589  |
| 20 | 6 | 0 | 2.626235  | 0.215910  | 1.255351  |
| 21 | 6 | 0 | 2.865360  | 0.987120  | -0.910692 |
| 22 | 6 | 0 | 4.214334  | 1.260496  | -0.713874 |
| 23 | 6 | 0 | 4.798649  | 0.991164  | 0.524878  |
| 24 | 6 | 0 | 3.967521  | 0.458870  | 1.516771  |
| 25 | 1 | 0 | 2.385630  | 1.177934  | -1.866824 |
| 26 | 6 | 0 | 1.692707  | -0.345506 | 2.262864  |
| 27 | 6 | 0 | 2.089034  | -0.657093 | 3.555300  |
| 28 | 6 | 0 | 1.188643  | -1.212455 | 4.469905  |
| 29 | 6 | 0 | -0.457166 | -1.082515 | 2.715719  |
| 30 | 6 | 0 | -0.112540 | -1.426242 | 4.016481  |
| 31 | 1 | 0 | -1.462579 | -1.238890 | 2.340608  |
| 32 | 7 | 0 | 2.089351  | 0.477946  | 0.046696  |
| 33 | 6 | 0 | 0.367699  | -1.871230 | -2.303099 |
| 34 | 6 | 0 | 0.810877  | -2.970652 | -0.211953 |
| 35 | 6 | 0 | 1.102990  | -4.147002 | -0.901429 |
| 36 | 6 | 0 | 1.027353  | -4.192102 | -2.294965 |
| 37 | 6 | 0 | 0.660492  | -3.050546 | -2.997429 |
| 38 | 1 | 0 | 0.872543  | -2.969343 | 0.874284  |
| 39 | 1 | 0 | 1.254029  | -5.109769 | -2.828143 |
| 40 | 6 | 0 | -0.035306 | -0.624202 | -2.968450 |
| 41 | 6 | 0 | -0.160496 | -0.435334 | -4.346517 |
| 42 | 6 | 0 | -0.546626 | 0.801946  | -4.839294 |
| 43 | 1 | 0 | 0.046239  | -1.255907 | -5.023180 |
| 44 | 6 | 0 | -0.666551 | 1.599548  | -2.592613 |
| 45 | 6 | 0 | -0.805997 | 1.842002  | -3.949185 |
| 46 | 1 | 0 | -0.645455 | 0.955530  | -5.909025 |
| 47 | 1 | 0 | -0.853087 | 2.369480  | -1.851624 |
| 48 | 1 | 0 | -1.112335 | 2.823188  | -4.291182 |
| 49 | 1 | 0 | 4.783623  | 1.675477  | -1.536799 |
| 50 | 1 | 0 | 4.380808  | 0.230406  | 2.491221  |
| 51 | 6 | 0 | 0.432231  | -1.804411 | -0.890733 |
| 52 | 7 | 0 | -0.289875 | 0.403077  | -2.117888 |

|    |    |   |           |           |           |
|----|----|---|-----------|-----------|-----------|
| 53 | 1  | 0 | -4.790748 | 1.413863  | 0.981170  |
| 54 | 1  | 0 | -4.565604 | -2.598986 | -0.492853 |
| 55 | 1  | 0 | -0.876780 | -1.856424 | 4.652009  |
| 56 | 1  | 0 | 3.111031  | -0.469282 | 3.861680  |
| 57 | 1  | 0 | 0.601142  | -3.085221 | -4.081716 |
| 58 | 1  | 0 | 1.389679  | -5.037546 | -0.348499 |
| 59 | 7  | 0 | 0.417434  | -0.553456 | 1.851669  |
| 60 | 6  | 0 | 6.272958  | 1.227137  | 0.836987  |
| 61 | 6  | 0 | 6.389806  | 2.131395  | 2.075577  |
| 62 | 6  | 0 | 6.926771  | -0.132154 | 1.140878  |
| 63 | 6  | 0 | 7.001274  | 1.886806  | -0.335077 |
| 64 | 1  | 0 | 5.887470  | 3.090374  | 1.910346  |
| 65 | 1  | 0 | 5.967158  | 1.659459  | 2.965737  |
| 66 | 1  | 0 | 7.446596  | 2.330751  | 2.281542  |
| 67 | 1  | 0 | 6.836604  | -0.810974 | 0.286548  |
| 68 | 1  | 0 | 7.990776  | 0.013453  | 1.354624  |
| 69 | 1  | 0 | 6.472910  | -0.604697 | 2.016342  |
| 70 | 1  | 0 | 8.048052  | 2.051959  | -0.063318 |
| 71 | 1  | 0 | 6.984290  | 1.257443  | -1.230791 |
| 72 | 1  | 0 | 6.562382  | 2.858438  | -0.585680 |
| 73 | 6  | 0 | 1.658086  | -1.534910 | 5.884445  |
| 74 | 6  | 0 | 2.879006  | -2.469091 | 5.815557  |
| 75 | 6  | 0 | 2.064885  | -0.219688 | 6.570472  |
| 76 | 6  | 0 | 0.557362  | -2.210022 | 6.704620  |
| 77 | 1  | 0 | 2.632505  | -3.399081 | 5.292986  |
| 78 | 1  | 0 | 3.726711  | -1.995905 | 5.313267  |
| 79 | 1  | 0 | 3.197780  | -2.721777 | 6.832173  |
| 80 | 1  | 0 | 1.219379  | 0.474274  | 6.619062  |
| 81 | 1  | 0 | 2.398573  | -0.428102 | 7.592333  |
| 82 | 1  | 0 | 2.890445  | 0.267244  | 6.044236  |
| 83 | 1  | 0 | 0.938741  | -2.434845 | 7.705022  |
| 84 | 1  | 0 | -0.318427 | -1.562907 | 6.819243  |
| 85 | 1  | 0 | 0.234681  | -3.151669 | 6.247896  |
| 86 | 15 | 0 | 6.383197  | -0.152040 | 5.506915  |
| 87 | 9  | 0 | 5.219751  | -0.343003 | 4.365715  |

|    |   |   |          |           |          |
|----|---|---|----------|-----------|----------|
| 88 | 9 | 0 | 5.264662 | -0.363860 | 6.661105 |
| 89 | 9 | 0 | 6.086348 | 1.442126  | 5.515223 |
| 90 | 9 | 0 | 7.528596 | 0.036528  | 6.631517 |
| 91 | 9 | 0 | 7.480516 | 0.059278  | 4.333234 |
| 92 | 9 | 0 | 6.650219 | -1.748723 | 5.473983 |

-----

**PC4-T1** (UM06-2X functional)

|                                               |                             |
|-----------------------------------------------|-----------------------------|
| Zero-point correction =                       | 0.729929 (Hartree/Particle) |
| Thermal correction to Energy =                | 0.778362                    |
| Thermal correction to Enthalpy =              | 0.779306                    |
| Thermal correction to Gibbs Free Energy =     | 0.643754                    |
| Sum of electronic and zero-point Energies =   | -2810.940457                |
| Sum of electronic and thermal Energies =      | -2810.892024                |
| Sum of electronic and thermal Enthalpies =    | -2810.891079                |
| Sum of electronic and thermal Free Energies = | -2811.026631                |
| SCF Done =                                    | -2811.67038572              |

**Imaginary frequency:** 0 (cm<sup>-1</sup>)

Standard orientation:

| Center<br>Number | Atomic<br>Number | Atomic<br>Type | Coordinates (Angstroms) |           |           |
|------------------|------------------|----------------|-------------------------|-----------|-----------|
|                  |                  |                | X                       | Y         | Z         |
| 1                | 77               | 0              | -0.016848               | -0.058683 | -0.160983 |
| 2                | 6                | 0              | -2.035328               | 1.906059  | 0.869370  |
| 3                | 6                | 0              | 0.053499                | 2.954355  | 0.909095  |
| 4                | 6                | 0              | -0.468608               | 4.111935  | 1.467202  |
| 5                | 6                | 0              | -1.836129               | 4.152070  | 1.729693  |
| 6                | 6                | 0              | -2.621467               | 3.055343  | 1.425651  |
| 7                | 1                | 0              | 1.110202                | 2.871376  | 0.667593  |
| 8                | 1                | 0              | 0.176828                | 4.953861  | 1.684942  |
| 9                | 1                | 0              | -2.284197               | 5.045770  | 2.151309  |
| 10               | 1                | 0              | -3.690857               | 3.082154  | 1.598693  |
| 11               | 6                | 0              | -2.762799               | 0.715336  | 0.447701  |
| 12               | 6                | 0              | -4.152020               | 0.574071  | 0.645036  |

|    |   |   |           |           |           |
|----|---|---|-----------|-----------|-----------|
| 13 | 6 | 0 | -1.984358 | -0.385377 | -0.055159 |
| 14 | 6 | 0 | -4.784572 | -0.616317 | 0.354990  |
| 15 | 6 | 0 | -2.660112 | -1.597609 | -0.264001 |
| 16 | 6 | 0 | -4.035195 | -1.709520 | -0.108693 |
| 17 | 1 | 0 | -5.854923 | -0.717439 | 0.506914  |
| 18 | 1 | 0 | -2.096591 | -2.459217 | -0.613086 |
| 19 | 7 | 0 | -0.694518 | 1.881312  | 0.643395  |
| 20 | 6 | 0 | 2.643215  | 0.224403  | 1.246901  |
| 21 | 6 | 0 | 2.903063  | 1.002632  | -0.915563 |
| 22 | 6 | 0 | 4.247363  | 1.287212  | -0.702221 |
| 23 | 6 | 0 | 4.816203  | 1.026447  | 0.545593  |
| 24 | 6 | 0 | 3.978180  | 0.483676  | 1.526725  |
| 25 | 1 | 0 | 2.431100  | 1.185851  | -1.877297 |
| 26 | 6 | 0 | 1.703143  | -0.351427 | 2.243209  |
| 27 | 6 | 0 | 2.089033  | -0.658902 | 3.540439  |
| 28 | 6 | 0 | 1.185686  | -1.226597 | 4.444903  |
| 29 | 6 | 0 | -0.434032 | -1.141628 | 2.665629  |
| 30 | 6 | 0 | -0.102323 | -1.474684 | 3.972630  |
| 31 | 1 | 0 | -1.428249 | -1.329284 | 2.274121  |
| 32 | 7 | 0 | 2.123061  | 0.480767  | 0.030517  |
| 33 | 6 | 0 | 0.244354  | -1.877884 | -2.384870 |
| 34 | 6 | 0 | 0.796261  | -2.976869 | -0.233102 |
| 35 | 6 | 0 | 1.006407  | -4.167330 | -0.914167 |
| 36 | 6 | 0 | 0.822456  | -4.221698 | -2.335973 |
| 37 | 6 | 0 | 0.446952  | -3.116888 | -3.061062 |
| 38 | 1 | 0 | 0.914164  | -2.954992 | 0.847544  |
| 39 | 1 | 0 | 0.976880  | -5.164291 | -2.853020 |
| 40 | 6 | 0 | -0.088868 | -0.657079 | -3.021988 |
| 41 | 6 | 0 | -0.261344 | -0.454416 | -4.420079 |
| 42 | 6 | 0 | -0.570327 | 0.792484  | -4.899315 |
| 43 | 1 | 0 | -0.135154 | -1.288070 | -5.102147 |
| 44 | 6 | 0 | -0.567984 | 1.627272  | -2.628420 |
| 45 | 6 | 0 | -0.734749 | 1.867429  | -3.983851 |
| 46 | 1 | 0 | -0.697647 | 0.951599  | -5.964941 |
| 47 | 1 | 0 | -0.692834 | 2.413724  | -1.891062 |

|    |   |   |           |           |           |
|----|---|---|-----------|-----------|-----------|
| 48 | 1 | 0 | -0.990493 | 2.864731  | -4.320237 |
| 49 | 1 | 0 | 4.824003  | 1.708159  | -1.516940 |
| 50 | 1 | 0 | 4.382679  | 0.257283  | 2.505481  |
| 51 | 6 | 0 | 0.424195  | -1.805891 | -0.915069 |
| 52 | 7 | 0 | -0.223847 | 0.426444  | -2.148186 |
| 53 | 1 | 0 | -4.729515 | 1.396085  | 1.056979  |
| 54 | 1 | 0 | -4.538648 | -2.644025 | -0.336670 |
| 55 | 1 | 0 | -0.864389 | -1.925508 | 4.596517  |
| 56 | 1 | 0 | 3.105221  | -0.459902 | 3.859172  |
| 57 | 1 | 0 | 0.316049  | -3.191734 | -4.135433 |
| 58 | 1 | 0 | 1.291015  | -5.064067 | -0.373380 |
| 59 | 7 | 0 | 0.436759  | -0.580331 | 1.818670  |
| 60 | 6 | 0 | 6.282974  | 1.281117  | 0.877795  |
| 61 | 6 | 0 | 6.372679  | 2.179043  | 2.123021  |
| 62 | 6 | 0 | 6.950391  | -0.071623 | 1.181575  |
| 63 | 6 | 0 | 7.017489  | 1.957318  | -0.280773 |
| 64 | 1 | 0 | 5.859505  | 3.132142  | 1.957295  |
| 65 | 1 | 0 | 5.946538  | 1.696835  | 3.005848  |
| 66 | 1 | 0 | 7.424367  | 2.391153  | 2.342128  |
| 67 | 1 | 0 | 6.880558  | -0.745984 | 0.321803  |
| 68 | 1 | 0 | 8.009365  | 0.086462  | 1.410766  |
| 69 | 1 | 0 | 6.490071  | -0.555441 | 2.047518  |
| 70 | 1 | 0 | 8.061151  | 2.124407  | 0.001732  |
| 71 | 1 | 0 | 7.011611  | 1.337956  | -1.183488 |
| 72 | 1 | 0 | 6.575675  | 2.929454  | -0.524191 |
| 73 | 6 | 0 | 1.642532  | -1.540521 | 5.865300  |
| 74 | 6 | 0 | 2.871293  | -2.465298 | 5.811157  |
| 75 | 6 | 0 | 2.032240  | -0.220433 | 6.552037  |
| 76 | 6 | 0 | 0.538365  | -2.221003 | 6.676038  |
| 77 | 1 | 0 | 2.637780  | -3.398709 | 5.288737  |
| 78 | 1 | 0 | 3.719755  | -1.985448 | 5.316529  |
| 79 | 1 | 0 | 3.181774  | -2.712059 | 6.831836  |
| 80 | 1 | 0 | 1.181505  | 0.467844  | 6.589285  |
| 81 | 1 | 0 | 2.355347  | -0.424313 | 7.578205  |
| 82 | 1 | 0 | 2.860773  | 0.271038  | 6.034725  |



|    |    |   |           |           |          |
|----|----|---|-----------|-----------|----------|
| 83 | 1  | 0 | 0.912820  | -2.444673 | 7.679316 |
| 84 | 1  | 0 | -0.341185 | -1.577658 | 6.783667 |
| 85 | 1  | 0 | 0.223544  | -3.163889 | 6.216537 |
| 86 | 15 | 0 | 6.359523  | -0.124826 | 5.541323 |
| 87 | 9  | 0 | 5.208657  | -0.319118 | 4.387636 |
| 88 | 9  | 0 | 5.231433  | -0.350523 | 6.683364 |
| 89 | 9  | 0 | 6.050607  | 1.466958  | 5.553839 |
| 90 | 9  | 0 | 7.492322  | 0.067069  | 6.677660 |
| 91 | 9  | 0 | 7.466521  | 0.099838  | 4.379400 |
| 92 | 9  | 0 | 6.638799  | -1.719303 | 5.503813 |

-----

**PC4-T1** (UM06-2X, singlet, freq)

|                                               |                             |
|-----------------------------------------------|-----------------------------|
| Zero-point correction =                       | 0.733357 (Hartree/Particle) |
| Thermal correction to Energy =                | 0.780035                    |
| Thermal correction to Enthalpy =              | 0.780979                    |
| Thermal correction to Gibbs Free Energy =     | 0.653052                    |
| Sum of electronic and zero-point Energies =   | -2811.040647                |
| Sum of electronic and thermal Energies =      | -2810.993969                |
| Sum of electronic and thermal Enthalpies =    | -2810.993025                |
| Sum of electronic and thermal Free Energies = | -2811.120952                |
| SCF Done =                                    | -2811.77400404              |

**PC4-T1** (UB3LYP functional)

|                                              |                             |
|----------------------------------------------|-----------------------------|
| Zero-point correction=                       | 0.723785 (Hartree/Particle) |
| Thermal correction to Energy=                | 0.772724                    |
| Thermal correction to Enthalpy=              | 0.773669                    |
| Thermal correction to Gibbs Free Energy=     | 0.637627                    |
| Sum of electronic and zero-point Energies=   | -2812.065554                |
| Sum of electronic and thermal Energies=      | -2812.016614                |
| Sum of electronic and thermal Enthalpies=    | -2812.015670                |
| Sum of electronic and thermal Free Energies= | -2812.151712                |
| SCF Done =                                   | -2812.78933840              |

**Imaginary frequency:** 0 (cm<sup>-1</sup>)

## Standard orientation:

| Center<br>Number | Atomic<br>Number | Atomic<br>Type | Coordinates (Angstroms) |           |           |
|------------------|------------------|----------------|-------------------------|-----------|-----------|
|                  |                  |                | X                       | Y         | Z         |
| 1                | 77               | 0              | -0.044887               | -0.064572 | -0.115643 |
| 2                | 6                | 0              | -2.093124               | 1.948657  | 0.858763  |
| 3                | 6                | 0              | 0.026238                | 2.943330  | 0.993389  |
| 4                | 6                | 0              | -0.494218               | 4.114244  | 1.529111  |
| 5                | 6                | 0              | -1.873582               | 4.191051  | 1.734256  |
| 6                | 6                | 0              | -2.674442               | 3.105979  | 1.398475  |
| 7                | 1                | 0              | 1.089538                | 2.832016  | 0.812127  |
| 8                | 1                | 0              | 0.166547                | 4.937406  | 1.776886  |
| 9                | 1                | 0              | -2.320495               | 5.087428  | 2.153366  |
| 10               | 1                | 0              | -3.745100               | 3.152993  | 1.557193  |
| 11               | 6                | 0              | -2.826115               | 0.732514  | 0.468263  |
| 12               | 6                | 0              | -4.225832               | 0.640552  | 0.570974  |
| 13               | 6                | 0              | -2.057530               | -0.362319 | -0.021181 |
| 14               | 6                | 0              | -4.888327               | -0.524114 | 0.195592  |
| 15               | 6                | 0              | -2.758661               | -1.522940 | -0.392941 |
| 16               | 6                | 0              | -4.149203               | -1.608188 | -0.287344 |
| 17               | 1                | 0              | -5.969600               | -0.585851 | 0.277921  |
| 18               | 1                | 0              | -2.209245               | -2.383142 | -0.763284 |
| 19               | 7                | 0              | -0.747048               | 1.893442  | 0.665940  |
| 20               | 6                | 0              | 2.632882                | 0.191606  | 1.264958  |
| 21               | 6                | 0              | 2.850199                | 0.970260  | -0.916143 |
| 22               | 6                | 0              | 4.195494                | 1.263337  | -0.727383 |
| 23               | 6                | 0              | 4.799823                | 1.006872  | 0.510005  |
| 24               | 6                | 0              | 3.979142                | 0.461409  | 1.511126  |
| 25               | 1                | 0              | 2.363563                | 1.155416  | -1.867610 |
| 26               | 6                | 0              | 1.705783                | -0.375428 | 2.273745  |
| 27               | 6                | 0              | 2.090360                | -0.687779 | 3.576770  |
| 28               | 6                | 0              | 1.184283                | -1.242637 | 4.493956  |
| 29               | 6                | 0              | -0.458377               | -1.111059 | 2.726911  |
| 30               | 6                | 0              | -0.119454               | -1.449481 | 4.030209  |

|    |   |   |           |           |           |
|----|---|---|-----------|-----------|-----------|
| 31 | 1 | 0 | -1.462443 | -1.266827 | 2.353503  |
| 32 | 7 | 0 | 2.083910  | 0.446273  | 0.049046  |
| 33 | 6 | 0 | 0.314244  | -1.881806 | -2.366258 |
| 34 | 6 | 0 | 0.776423  | -3.018503 | -0.215010 |
| 35 | 6 | 0 | 1.054733  | -4.198564 | -0.904991 |
| 36 | 6 | 0 | 0.958999  | -4.226236 | -2.333711 |
| 37 | 6 | 0 | 0.602456  | -3.112939 | -3.050957 |
| 38 | 1 | 0 | 0.847686  | -3.018669 | 0.868969  |
| 39 | 1 | 0 | 1.176850  | -5.153100 | -2.858646 |
| 40 | 6 | 0 | -0.037470 | -0.680478 | -2.994245 |
| 41 | 6 | 0 | -0.183078 | -0.461690 | -4.402617 |
| 42 | 6 | 0 | -0.550670 | 0.764199  | -4.889905 |
| 43 | 1 | 0 | 0.003275  | -1.289393 | -5.078363 |
| 44 | 6 | 0 | -0.641738 | 1.593366  | -2.608853 |
| 45 | 6 | 0 | -0.793494 | 1.828944  | -3.970248 |
| 46 | 1 | 0 | -0.659634 | 0.926511  | -5.957402 |
| 47 | 1 | 0 | -0.818298 | 2.383089  | -1.887408 |
| 48 | 1 | 0 | -1.091359 | 2.814556  | -4.308823 |
| 49 | 1 | 0 | 4.749937  | 1.683980  | -1.556433 |
| 50 | 1 | 0 | 4.401886  | 0.243590  | 2.482730  |
| 51 | 6 | 0 | 0.398977  | -1.843956 | -0.881247 |
| 52 | 7 | 0 | -0.265639 | 0.408811  | -2.106788 |
| 53 | 1 | 0 | -4.804863 | 1.480142  | 0.943241  |
| 54 | 1 | 0 | -4.656825 | -2.523378 | -0.582365 |
| 55 | 1 | 0 | -0.890199 | -1.873012 | 4.661084  |
| 56 | 1 | 0 | 3.109028  | -0.501259 | 3.889785  |
| 57 | 1 | 0 | 0.540438  | -3.161881 | -4.133433 |
| 58 | 1 | 0 | 1.340427  | -5.098583 | -0.369294 |
| 59 | 7 | 0 | 0.422469  | -0.588215 | 1.857264  |
| 60 | 6 | 0 | 6.282073  | 1.285233  | 0.791014  |
| 61 | 6 | 0 | 6.404371  | 2.227610  | 2.011953  |
| 62 | 6 | 0 | 6.988100  | -0.056223 | 1.104782  |
| 63 | 6 | 0 | 6.981115  | 1.944498  | -0.410883 |
| 64 | 1 | 0 | 5.868015  | 3.167888  | 1.842786  |
| 65 | 1 | 0 | 6.021285  | 1.768468  | 2.925075  |

|    |    |   |           |           |           |
|----|----|---|-----------|-----------|-----------|
| 66 | 1  | 0 | 7.459071  | 2.467940  | 2.184839  |
| 67 | 1  | 0 | 6.905835  | -0.752881 | 0.263229  |
| 68 | 1  | 0 | 8.052055  | 0.122345  | 1.294345  |
| 69 | 1  | 0 | 6.569209  | -0.536092 | 1.992623  |
| 70 | 1  | 0 | 8.030259  | 2.131457  | -0.161228 |
| 71 | 1  | 0 | 6.963775  | 1.305543  | -1.300224 |
| 72 | 1  | 0 | 6.526522  | 2.906765  | -0.670516 |
| 73 | 6  | 0 | 1.632487  | -1.583725 | 5.920983  |
| 74 | 6  | 0 | 2.850320  | -2.537966 | 5.865485  |
| 75 | 6  | 0 | 2.035720  | -0.274268 | 6.640776  |
| 76 | 6  | 0 | 0.511426  | -2.266164 | 6.725012  |
| 77 | 1  | 0 | 2.606551  | -3.460391 | 5.327080  |
| 78 | 1  | 0 | 3.716798  | -2.076561 | 5.386578  |
| 79 | 1  | 0 | 3.146397  | -2.810636 | 6.884308  |
| 80 | 1  | 0 | 1.195192  | 0.427112  | 6.683810  |
| 81 | 1  | 0 | 2.342526  | -0.497921 | 7.668245  |
| 82 | 1  | 0 | 2.874497  | 0.221282  | 6.145687  |
| 83 | 1  | 0 | 0.877798  | -2.503520 | 7.728700  |
| 84 | 1  | 0 | -0.365738 | -1.620499 | 6.840195  |
| 85 | 1  | 0 | 0.188967  | -3.204164 | 6.260031  |
| 86 | 15 | 0 | 6.515040  | -0.100741 | 5.649944  |
| 87 | 9  | 0 | 5.344813  | -0.336656 | 4.500551  |
| 88 | 9  | 0 | 5.378389  | -0.253699 | 6.816586  |
| 89 | 9  | 0 | 6.228772  | 1.507572  | 5.585786  |
| 90 | 9  | 0 | 7.665049  | 0.132313  | 6.781522  |
| 91 | 9  | 0 | 7.630525  | 0.051632  | 4.464573  |
| 92 | 9  | 0 | 6.773970  | -1.711532 | 5.690459  |

-----

**PC4-T1 (UB3LYP, singlet, freq)**

|                                            |                             |
|--------------------------------------------|-----------------------------|
| Zero-point correction=                     | 0.726803 (Hartree/Particle) |
| Thermal correction to Energy=              | 0.774115                    |
| Thermal correction to Enthalpy=            | 0.775059                    |
| Thermal correction to Gibbs Free Energy=   | 0.645457                    |
| Sum of electronic and zero-point Energies= | -2812.149632                |
| Sum of electronic and thermal Energies=    | -2812.102320                |

Sum of electronic and thermal Enthalpies= -2812.101376  
 Sum of electronic and thermal Free Energies= -2812.230977  
 SCF Done = -2812.87643464

Acyl azoliumion **6** (M06-2X functional)

Zero-point correction = 0.263726 (Hartree/Particle)  
 Thermal correction to Energy = 0.285868  
 Thermal correction to Enthalpy = 0.286812  
 Thermal correction to Gibbs Free Energy = 0.208773  
 Sum of electronic and zero-point Energies = -1610.548856  
 Sum of electronic and thermal Energies = -1610.526714  
 Sum of electronic and thermal Enthalpies = -1610.525770  
 Sum of electronic and thermal Free Energies = -1610.603809  
 SCF Done = -1610.81258223

**Imaginary frequency:** 0 (cm<sup>-1</sup>)

Standard orientation:

| Center<br>Number | Atomic<br>Number | Atomic<br>Type | Coordinates (Angstroms) |           |           |
|------------------|------------------|----------------|-------------------------|-----------|-----------|
|                  |                  |                | X                       | Y         | Z         |
| 1                | 6                | 0              | 0.511499                | -0.388056 | 0.329247  |
| 2                | 6                | 0              | 2.148555                | 0.978951  | -0.226008 |
| 3                | 6                | 0              | 0.969793                | 1.628361  | -0.444766 |
| 4                | 7                | 0              | -0.030550               | 0.765199  | -0.083708 |
| 5                | 1                | 0              | 3.171110                | 1.298395  | -0.354336 |
| 6                | 1                | 0              | 0.754909                | 2.622221  | -0.818152 |
| 7                | 7                | 0              | 1.845627                | -0.270072 | 0.251451  |
| 8                | 6                | 0              | -1.459402               | 1.089988  | -0.147092 |
| 9                | 1                | 0              | -2.023939               | 0.188328  | -0.377961 |
| 10               | 1                | 0              | -1.779776               | 1.493906  | 0.813479  |
| 11               | 1                | 0              | -1.585670               | 1.825628  | -0.940145 |
| 12               | 6                | 0              | 2.857602                | -1.247791 | 0.665163  |
| 13               | 1                | 0              | 3.160125                | -1.852084 | -0.190400 |
| 14               | 1                | 0              | 3.711985                | -0.690916 | 1.047694  |

|    |    |   |           |           |           |
|----|----|---|-----------|-----------|-----------|
| 15 | 1  | 0 | 2.455631  | -1.880974 | 1.453905  |
| 16 | 6  | 0 | -0.295195 | -1.545506 | 0.851101  |
| 17 | 8  | 0 | -1.221513 | -1.292229 | 1.594840  |
| 18 | 6  | 0 | 0.054117  | -2.916315 | 0.416586  |
| 19 | 6  | 0 | 0.743303  | -3.149619 | -0.778430 |
| 20 | 6  | 0 | -0.370535 | -3.987932 | 1.211270  |
| 21 | 6  | 0 | 1.011091  | -4.456144 | -1.173113 |
| 22 | 1  | 0 | 1.049612  | -2.318169 | -1.408352 |
| 23 | 6  | 0 | -0.086626 | -5.288742 | 0.818993  |
| 24 | 1  | 0 | -0.910179 | -3.785295 | 2.131048  |
| 25 | 6  | 0 | 0.603434  | -5.521661 | -0.372023 |
| 26 | 1  | 0 | 1.535267  | -4.642711 | -2.104451 |
| 27 | 1  | 0 | -0.400796 | -6.123117 | 1.437349  |
| 28 | 1  | 0 | 0.822408  | -6.540236 | -0.677256 |
| 29 | 16 | 0 | -0.777275 | 4.516149  | -2.228690 |
| 30 | 8  | 0 | -0.949100 | 3.121575  | -2.670452 |
| 31 | 8  | 0 | -0.597055 | 5.499603  | -3.298643 |
| 32 | 8  | 0 | 0.110747  | 4.670597  | -1.064422 |
| 33 | 6  | 0 | -2.425214 | 4.927965  | -1.540578 |
| 34 | 9  | 0 | -2.748709 | 4.081754  | -0.556009 |
| 35 | 9  | 0 | -3.370583 | 4.846878  | -2.478800 |
| 36 | 9  | 0 | -2.440275 | 6.165054  | -1.040912 |

**6-T1 (UM06-2X functional)**

|                                              |                             |
|----------------------------------------------|-----------------------------|
| Zero-point correction=                       | 0.260285 (Hartree/Particle) |
| Thermal correction to Energy=                | 0.282074                    |
| Thermal correction to Enthalpy=              | 0.283018                    |
| Thermal correction to Gibbs Free Energy=     | 0.205332                    |
| Sum of electronic and zero-point Energies=   | -1610.445324                |
| Sum of electronic and thermal Energies=      | -1610.423535                |
| Sum of electronic and thermal Enthalpies=    | -1610.422591                |
| Sum of electronic and thermal Free Energies= | -1610.500277                |
| SCF Done =                                   | -1610.70560916              |

**Imaginary frequency:** 0 (cm<sup>-1</sup>)

## Standard orientation:

| Center<br>Number | Atomic<br>Number | Atomic<br>Type | Coordinates (Angstroms) |           |           |
|------------------|------------------|----------------|-------------------------|-----------|-----------|
|                  |                  |                | X                       | Y         | Z         |
| 1                | 6                | 0              | 0.539915                | -0.494209 | 0.107725  |
| 2                | 6                | 0              | 2.087217                | 0.960663  | -0.502709 |
| 3                | 6                | 0              | 0.874465                | 1.575741  | -0.592795 |
| 4                | 7                | 0              | -0.073316               | 0.660576  | -0.220629 |
| 5                | 1                | 0              | 3.082488                | 1.324242  | -0.704886 |
| 6                | 1                | 0              | 0.607043                | 2.574416  | -0.899865 |
| 7                | 7                | 0              | 1.866998                | -0.318592 | -0.064146 |
| 8                | 6                | 0              | -1.512379               | 0.907865  | -0.179092 |
| 9                | 1                | 0              | -2.036274               | 0.040253  | -0.581855 |
| 10               | 1                | 0              | -1.806795               | 1.103798  | 0.851313  |
| 11               | 1                | 0              | -1.717083               | 1.778091  | -0.801045 |
| 12               | 6                | 0              | 2.911512                | -1.241916 | 0.366284  |
| 13               | 1                | 0              | 3.051707                | -2.037449 | -0.366526 |
| 14               | 1                | 0              | 3.832913                | -0.671040 | 0.470143  |
| 15               | 1                | 0              | 2.629664                | -1.658411 | 1.334273  |
| 16               | 6                | 0              | -0.104598               | -1.658160 | 0.644596  |
| 17               | 8                | 0              | -1.088307               | -1.407726 | 1.504249  |
| 18               | 6                | 0              | 0.164055                | -3.037206 | 0.321550  |
| 19               | 6                | 0              | 0.798273                | -3.382857 | -0.889542 |
| 20               | 6                | 0              | -0.250704               | -4.058254 | 1.201991  |
| 21               | 6                | 0              | 1.046908                | -4.714700 | -1.183696 |
| 22               | 1                | 0              | 1.077693                | -2.607611 | -1.597581 |
| 23               | 6                | 0              | -0.012587               | -5.387089 | 0.881100  |
| 24               | 1                | 0              | -0.733385               | -3.800229 | 2.139555  |
| 25               | 6                | 0              | 0.641917                | -5.722296 | -0.304719 |
| 26               | 1                | 0              | 1.547001                | -4.971251 | -2.112195 |
| 27               | 1                | 0              | -0.329676               | -6.166578 | 1.566575  |
| 28               | 1                | 0              | 0.833769                | -6.762797 | -0.545294 |
| 29               | 16               | 0              | 0.814120                | 1.362988  | 3.185897  |

|    |   |   |           |          |          |
|----|---|---|-----------|----------|----------|
| 30 | 8 | 0 | -0.425508 | 1.844625 | 2.558339 |
| 31 | 8 | 0 | 1.875255  | 2.364902 | 3.333233 |
| 32 | 8 | 0 | 1.262011  | 0.036544 | 2.731288 |
| 33 | 6 | 0 | 0.293217  | 1.041184 | 4.912406 |
| 34 | 9 | 0 | -0.697133 | 0.146339 | 4.953612 |
| 35 | 9 | 0 | -0.139640 | 2.161105 | 5.497762 |
| 36 | 9 | 0 | 1.308276  | 0.564654 | 5.637891 |

**6-T1 (UM06-2X, singlet, freq)**

|                                              |                             |
|----------------------------------------------|-----------------------------|
| Zero-point correction=                       | 0.263051 (Hartree/Particle) |
| Thermal correction to Energy=                | 0.283971                    |
| Thermal correction to Enthalpy=              | 0.284915                    |
| Thermal correction to Gibbs Free Energy=     | 0.211169                    |
| Sum of electronic and zero-point Energies=   | -1610.529508                |
| Sum of electronic and thermal Energies=      | -1610.508589                |
| Sum of electronic and thermal Enthalpies=    | -1610.507645                |
| Sum of electronic and thermal Free Energies= | -1610.581391                |
| SCF Done =                                   | -1610.79255980              |

**6-T1 (UB3LYP functional)**

|                                              |                             |
|----------------------------------------------|-----------------------------|
| Zero-point correction=                       | 0.256850 (Hartree/Particle) |
| Thermal correction to Energy=                | 0.279722                    |
| Thermal correction to Enthalpy=              | 0.280666                    |
| Thermal correction to Gibbs Free Energy=     | 0.201003                    |
| Sum of electronic and zero-point Energies=   | -1610.953702                |
| Sum of electronic and thermal Energies=      | -1610.93083                 |
| Sum of electronic and thermal Enthalpies=    | -1610.929886                |
| Sum of electronic and thermal Free Energies= | -1611.009549                |
| SCF Done =                                   | -1611.21055237              |

**Imaginary frequency:** 0 (cm<sup>-1</sup>)



## Standard orientation:

| Center<br>Number | Atomic<br>Number | Atomic<br>Type | Coordinates (Angstroms) |           |           |
|------------------|------------------|----------------|-------------------------|-----------|-----------|
|                  |                  |                | X                       | Y         | Z         |
| 1                | 6                | 0              | 0.603266                | -0.237221 | -0.125797 |
| 2                | 6                | 0              | 2.128600                | 1.008979  | -1.179138 |
| 3                | 6                | 0              | 0.945262                | 1.683835  | -1.209878 |
| 4                | 7                | 0              | 0.009528                | 0.914593  | -0.558380 |
| 5                | 1                | 0              | 3.099419                | 1.270475  | -1.568803 |
| 6                | 1                | 0              | 0.689610                | 2.636692  | -1.645503 |
| 7                | 7                | 0              | 1.917296                | -0.170629 | -0.499020 |
| 8                | 6                | 0              | -1.401768               | 1.270869  | -0.410970 |
| 9                | 1                | 0              | -2.030289               | 0.443987  | -0.745881 |
| 10               | 1                | 0              | -1.615827               | 1.501412  | 0.632162  |
| 11               | 1                | 0              | -1.591466               | 2.142925  | -1.036371 |
| 12               | 6                | 0              | 2.982646                | -1.083420 | -0.084937 |
| 13               | 1                | 0              | 2.971041                | -1.998277 | -0.680206 |
| 14               | 1                | 0              | 3.933601                | -0.570896 | -0.227583 |
| 15               | 1                | 0              | 2.853306                | -1.322113 | 0.971602  |
| 16               | 6                | 0              | -0.023378               | -1.274238 | 0.627521  |
| 17               | 8                | 0              | -1.017570               | -0.968044 | 1.445967  |
| 18               | 6                | 0              | 0.228406                | -2.701925 | 0.520293  |
| 19               | 6                | 0              | 0.617608                | -3.309206 | -0.698915 |
| 20               | 6                | 0              | -0.002661               | -3.523864 | 1.654482  |
| 21               | 6                | 0              | 0.824391                | -4.680309 | -0.757590 |
| 22               | 1                | 0              | 0.744823                | -2.702024 | -1.589516 |
| 23               | 6                | 0              | 0.187679                | -4.898247 | 1.572618  |
| 24               | 1                | 0              | -0.291800               | -3.060414 | 2.590475  |
| 25               | 6                | 0              | 0.606373                | -5.483443 | 0.373184  |
| 26               | 1                | 0              | 1.140873                | -5.134982 | -1.691667 |
| 27               | 1                | 0              | 0.021714                | -5.515687 | 2.450387  |
| 28               | 1                | 0              | 0.760575                | -6.556496 | 0.313930  |
| 29               | 16               | 0              | 0.860189                | 0.799229  | 3.566915  |
| 30               | 8                | 0              | -0.209659               | 1.136551  | 2.578385  |

|    |   |   |           |           |          |
|----|---|---|-----------|-----------|----------|
| 31 | 8 | 0 | 1.416505  | 1.980899  | 4.258855 |
| 32 | 8 | 0 | 1.845417  | -0.201398 | 3.103913 |
| 33 | 6 | 0 | -0.068585 | -0.091571 | 4.912051 |
| 34 | 9 | 0 | -0.644931 | -1.217123 | 4.456962 |
| 35 | 9 | 0 | -1.035387 | 0.690335  | 5.421429 |
| 36 | 9 | 0 | 0.764232  | -0.429638 | 5.912243 |

**6-T1** (UB3LYP, singlet, freq)

|                                              |                             |
|----------------------------------------------|-----------------------------|
| Zero-point correction=                       | 0.259184 (Hartree/Particle) |
| Thermal correction to Energy=                | 0.28059                     |
| Thermal correction to Enthalpy=              | 0.281543                    |
| Thermal correction to Gibbs Free Energy=     | 0.206428                    |
| Sum of electronic and zero-point Energies=   | -1611.019739                |
| Sum of electronic and thermal Energies=      | -1610.998324                |
| Sum of electronic and thermal Enthalpies=    | -1610.997380                |
| Sum of electronic and thermal Free Energies= | -1611.072495                |
| SCF Done =                                   | -1611.27892306              |

Triazolium salt **7** (M06-2X functional)

|                                              |                             |
|----------------------------------------------|-----------------------------|
| Zero-point correction=                       | 0.410789 (Hartree/Particle) |
| Thermal correction to Energy=                | 0.439026                    |
| Thermal correction to Enthalpy=              | 0.439970                    |
| Thermal correction to Gibbs Free Energy=     | 0.350307                    |
| Sum of electronic and zero-point Energies=   | -1476.492731                |
| Sum of electronic and thermal Energies=      | -1476.464495                |
| Sum of electronic and thermal Enthalpies=    | -1476.463551                |
| Sum of electronic and thermal Free Energies= | -1476.553214                |
| SCF Done =                                   | -1476.90352059              |

**Imaginary frequency:** 0 (cm<sup>-1</sup>)

## Standard orientation:

| Center<br>Number | Atomic<br>Number | Atomic<br>Type | Coordinates (Angstroms) |           |           |
|------------------|------------------|----------------|-------------------------|-----------|-----------|
|                  |                  |                | X                       | Y         | Z         |
| 1                | 6                | 0              | -1.843098               | 0.359823  | -0.610946 |
| 2                | 6                | 0              | -0.679311               | 2.128664  | -0.107655 |
| 3                | 7                | 0              | -0.601571               | 0.035332  | -0.252602 |
| 4                | 7                | 0              | -1.908047               | 1.688250  | -0.511716 |
| 5                | 6                | 0              | -2.842189               | 2.785855  | -0.829970 |
| 6                | 1                | 0              | -3.836246               | 2.564161  | -0.443534 |
| 7                | 1                | 0              | -2.875912               | 2.891734  | -1.916046 |
| 8                | 6                | 0              | -2.890060               | -0.627880 | -1.071409 |
| 9                | 8                | 0              | -2.553012               | -1.446499 | -1.898759 |
| 10               | 6                | 0              | -4.239753               | -0.534821 | -0.480970 |
| 11               | 6                | 0              | -4.472368               | 0.156877  | 0.714428  |
| 12               | 6                | 0              | -5.286107               | -1.204141 | -1.128342 |
| 13               | 6                | 0              | -5.752873               | 0.177718  | 1.257127  |
| 14               | 1                | 0              | -3.660351               | 0.660867  | 1.233007  |
| 15               | 6                | 0              | -6.562846               | -1.168612 | -0.586852 |
| 16               | 1                | 0              | -5.083441               | -1.738390 | -2.051045 |
| 17               | 6                | 0              | -6.795040               | -0.479153 | 0.605130  |
| 18               | 1                | 0              | -5.936373               | 0.703895  | 2.187801  |
| 19               | 1                | 0              | -7.378922               | -1.677185 | -1.089072 |
| 20               | 1                | 0              | -7.794534               | -0.455673 | 1.028140  |
| 21               | 9                | 0              | 1.238655                | 2.484863  | -2.335000 |
| 22               | 9                | 0              | 2.875609                | 1.217879  | -1.345784 |
| 23               | 9                | 0              | 3.404608                | 3.215206  | -2.324972 |
| 24               | 7                | 0              | 0.137931                | 1.126967  | 0.075678  |
| 25               | 6                | 0              | -0.639032               | 3.618468  | -0.083016 |
| 26               | 1                | 0              | -0.122983               | 4.011210  | 0.791882  |
| 27               | 1                | 0              | -0.103534               | 3.940854  | -0.979117 |
| 28               | 6                | 0              | -2.145509               | 3.969479  | -0.127171 |
| 29               | 6                | 0              | -0.028765               | -1.283492 | -0.159239 |
| 30               | 6                | 0              | 0.698818                | -1.756045 | -1.251008 |

|    |   |   |           |           |           |
|----|---|---|-----------|-----------|-----------|
| 31 | 6 | 0 | -0.216324 | -1.998873 | 1.025410  |
| 32 | 6 | 0 | 1.273760  | -3.021400 | -1.120758 |
| 33 | 6 | 0 | 0.373459  | -3.258107 | 1.100978  |
| 34 | 6 | 0 | 1.124185  | -3.778626 | 0.042199  |
| 35 | 1 | 0 | 1.848376  | -3.423496 | -1.951393 |
| 36 | 1 | 0 | 0.248730  | -3.843344 | 2.009075  |
| 37 | 6 | 0 | 0.812937  | -0.946449 | -2.512142 |
| 38 | 1 | 0 | -0.167287 | -0.877364 | -2.997300 |
| 39 | 1 | 0 | 1.162942  | 0.069270  | -2.308740 |
| 40 | 1 | 0 | 1.507083  | -1.422640 | -3.207365 |
| 41 | 6 | 0 | -1.033179 | -1.428531 | 2.152126  |
| 42 | 1 | 0 | -0.677422 | -0.431846 | 2.433338  |
| 43 | 1 | 0 | -2.086523 | -1.333897 | 1.862286  |
| 44 | 1 | 0 | -0.980006 | -2.074268 | 3.030201  |
| 45 | 6 | 0 | 1.768176  | -5.133537 | 0.170615  |
| 46 | 1 | 0 | 2.597758  | -5.098618 | 0.884569  |
| 47 | 1 | 0 | 1.052516  | -5.872918 | 0.541270  |
| 48 | 1 | 0 | 2.160210  | -5.479720 | -0.788018 |
| 49 | 5 | 0 | 2.434223  | 2.522530  | -1.591493 |
| 50 | 9 | 0 | 2.201800  | 3.185254  | -0.377676 |
| 51 | 1 | 0 | -2.336601 | 4.903429  | -0.654631 |
| 52 | 1 | 0 | -2.532431 | 4.056855  | 0.890517  |

**7-T1 (UM06-2X functional)**

|                                              |                             |
|----------------------------------------------|-----------------------------|
| Zero-point correction=                       | 0.408219 (Hartree/Particle) |
| Thermal correction to Energy=                | 0.436660                    |
| Thermal correction to Enthalpy=              | 0.437604                    |
| Thermal correction to Gibbs Free Energy=     | 0.345881                    |
| Sum of electronic and zero-point Energies=   | -1476.403531                |
| Sum of electronic and thermal Energies=      | -1476.375090                |
| Sum of electronic and thermal Enthalpies=    | -1476.374146                |
| Sum of electronic and thermal Free Energies= | -1476.465869                |
| SCF Done =                                   | -1476.81175032              |

**Imaginary frequency:** 0 (cm<sup>-1</sup>)

## Standard orientation:

| Center<br>Number | Atomic<br>Number | Atomic<br>Type | Coordinates (Angstroms) |           |           |
|------------------|------------------|----------------|-------------------------|-----------|-----------|
|                  |                  |                | X                       | Y         | Z         |
| 1                | 6                | 0              | -1.542101               | 0.387072  | 0.096250  |
| 2                | 6                | 0              | -0.185609               | 2.058734  | 0.484174  |
| 3                | 7                | 0              | -0.273419               | -0.025780 | 0.335797  |
| 4                | 7                | 0              | -1.491628               | 1.731902  | 0.227467  |
| 5                | 6                | 0              | -2.328375               | 2.896630  | -0.091254 |
| 6                | 1                | 0              | -3.288348               | 2.837689  | 0.418738  |
| 7                | 1                | 0              | -2.467720               | 2.922698  | -1.172042 |
| 8                | 6                | 0              | -2.475693               | -0.607120 | -0.261000 |
| 9                | 8                | 0              | -1.969041               | -1.804982 | -0.375313 |
| 10               | 6                | 0              | -3.902470               | -0.397562 | -0.530520 |
| 11               | 6                | 0              | -4.657907               | 0.493721  | 0.243515  |
| 12               | 6                | 0              | -4.526046               | -1.139035 | -1.544302 |
| 13               | 6                | 0              | -6.010130               | 0.675024  | -0.027360 |
| 14               | 1                | 0              | -4.196469               | 1.008467  | 1.080423  |
| 15               | 6                | 0              | -5.879002               | -0.956817 | -1.802825 |
| 16               | 1                | 0              | -3.939539               | -1.839006 | -2.131030 |
| 17               | 6                | 0              | -6.621891               | -0.044425 | -1.052540 |
| 18               | 1                | 0              | -6.590572               | 1.366325  | 0.575420  |
| 19               | 1                | 0              | -6.355988               | -1.523379 | -2.596379 |
| 20               | 1                | 0              | -7.677701               | 0.097533  | -1.260359 |
| 21               | 9                | 0              | -1.182920               | 1.473904  | -2.543193 |
| 22               | 9                | 0              | 0.971361                | 2.206453  | -2.259296 |
| 23               | 9                | 0              | -0.079394               | 2.484795  | -4.276909 |
| 24               | 7                | 0              | 0.587381                | 1.014089  | 0.571317  |
| 25               | 6                | 0              | 0.007112                | 3.537300  | 0.461953  |
| 26               | 1                | 0              | 0.572475                | 3.899500  | 1.321190  |
| 27               | 1                | 0              | 0.542958                | 3.784316  | -0.457108 |
| 28               | 6                | 0              | -1.450340               | 4.055966  | 0.428556  |
| 29               | 6                | 0              | 0.114435                | -1.394990 | 0.269643  |

|    |   |   |           |           |           |
|----|---|---|-----------|-----------|-----------|
| 30 | 6 | 0 | 0.724908  | -1.869588 | -0.928943 |
| 31 | 6 | 0 | 0.079867  | -2.165672 | 1.470470  |
| 32 | 6 | 0 | 1.203168  | -3.166777 | -0.924486 |
| 33 | 6 | 0 | 0.576100  | -3.448019 | 1.413050  |
| 34 | 6 | 0 | 1.136901  | -3.967485 | 0.226160  |
| 35 | 1 | 0 | 1.644839  | -3.572339 | -1.829919 |
| 36 | 1 | 0 | 0.544651  | -4.074368 | 2.300379  |
| 37 | 6 | 0 | 0.780856  | -0.990398 | -2.134960 |
| 38 | 1 | 0 | -0.227148 | -0.682281 | -2.432542 |
| 39 | 1 | 0 | 1.330276  | -0.066853 | -1.928737 |
| 40 | 1 | 0 | 1.256094  | -1.514216 | -2.965563 |
| 41 | 6 | 0 | -0.530257 | -1.582886 | 2.707140  |
| 42 | 1 | 0 | -0.049752 | -0.635553 | 2.971720  |
| 43 | 1 | 0 | -1.594932 | -1.377227 | 2.544412  |
| 44 | 1 | 0 | -0.435896 | -2.275488 | 3.544317  |
| 45 | 6 | 0 | 1.658249  | -5.369600 | 0.215892  |
| 46 | 1 | 0 | 2.422792  | -5.495091 | 0.989708  |
| 47 | 1 | 0 | 0.850369  | -6.071478 | 0.449482  |
| 48 | 1 | 0 | 2.085849  | -5.634287 | -0.752034 |
| 49 | 5 | 0 | -0.251658 | 2.469083  | -2.894798 |
| 50 | 9 | 0 | -0.729136 | 3.716561  | -2.457740 |
| 51 | 1 | 0 | -1.551177 | 4.931208  | -0.212286 |
| 52 | 1 | 0 | -1.768254 | 4.323648  | 1.438298  |

**7-T1** (UM06-2X, singlet, freq)

|                                              |                             |
|----------------------------------------------|-----------------------------|
| Zero-point correction=                       | 0.410171 (Hartree/Particle) |
| Thermal correction to Energy=                | 0.437213                    |
| Thermal correction to Enthalpy=              | 0.438157                    |
| Thermal correction to Gibbs Free Energy=     | 0.351552                    |
| Sum of electronic and zero-point Energies=   | -1476.454855                |
| Sum of electronic and thermal Energies=      | -1476.427813                |
| Sum of electronic and thermal Enthalpies=    | -1476.426868                |
| Sum of electronic and thermal Free Energies= | -1476.513474                |
| SCF Done =                                   | -1476.86502581              |

**7-T1** (UB3LYP functional)

|                                              |                             |
|----------------------------------------------|-----------------------------|
| Zero-point correction=                       | 0.403757 (Hartree/Particle) |
| Thermal correction to Energy=                | 0.432918                    |
| Thermal correction to Enthalpy=              | 0.433862                    |
| Thermal correction to Gibbs Free Energy=     | 0.339095                    |
| Sum of electronic and zero-point Energies=   | -1476.993328                |
| Sum of electronic and thermal Energies=      | -1476.964168                |
| Sum of electronic and thermal Enthalpies=    | -1476.963224                |
| Sum of electronic and thermal Free Energies= | -1477.057990                |
| SCF Done =                                   | -1477.39708530              |

**Imaginary frequency:** 0 (cm<sup>-1</sup>)

Standard orientation:

| Center<br>Number | Atomic<br>Number | Atomic<br>Type | Coordinates (Angstroms) |           |           |
|------------------|------------------|----------------|-------------------------|-----------|-----------|
|                  |                  |                | X                       | Y         | Z         |
| 1                | 6                | 0              | -1.940563               | 0.348205  | 0.012272  |
| 2                | 6                | 0              | -0.626422               | 2.105773  | 0.228009  |
| 3                | 7                | 0              | -0.624123               | -0.001998 | 0.151102  |
| 4                | 7                | 0              | -1.931878               | 1.711027  | 0.072937  |
| 5                | 6                | 0              | -2.842482               | 2.842627  | -0.188198 |
| 6                | 1                | 0              | -3.773284               | 2.734219  | 0.365404  |
| 7                | 1                | 0              | -3.062071               | 2.873082  | -1.259234 |
| 8                | 6                | 0              | -2.891215               | -0.678250 | -0.183389 |
| 9                | 8                | 0              | -2.385686               | -1.882542 | -0.279932 |
| 10               | 6                | 0              | -4.351678               | -0.539540 | -0.316563 |
| 11               | 6                | 0              | -5.099725               | 0.319702  | 0.509666  |
| 12               | 6                | 0              | -5.024134               | -1.352229 | -1.250949 |
| 13               | 6                | 0              | -6.484021               | 0.397473  | 0.366400  |
| 14               | 1                | 0              | -4.606797               | 0.896014  | 1.285278  |
| 15               | 6                | 0              | -6.407502               | -1.270804 | -1.383155 |
| 16               | 1                | 0              | -4.452751               | -2.029720 | -1.876578 |
| 17               | 6                | 0              | -7.141814               | -0.391964 | -0.580986 |
| 18               | 1                | 0              | -7.051015               | 1.065735  | 1.007774  |

|    |   |   |           |           |           |
|----|---|---|-----------|-----------|-----------|
| 19 | 1 | 0 | -6.913847 | -1.892241 | -2.115832 |
| 20 | 1 | 0 | -8.220780 | -0.329985 | -0.686561 |
| 21 | 9 | 0 | 1.795478  | 1.866350  | -2.854696 |
| 22 | 9 | 0 | 3.817744  | 1.917011  | -1.763296 |
| 23 | 9 | 0 | 3.316449  | 3.516726  | -3.332998 |
| 24 | 7 | 0 | 0.204935  | 1.098860  | 0.281539  |
| 25 | 6 | 0 | -0.504703 | 3.593278  | 0.195637  |
| 26 | 1 | 0 | 0.109288  | 3.976622  | 1.013133  |
| 27 | 1 | 0 | -0.023874 | 3.888217  | -0.740700 |
| 28 | 6 | 0 | -1.988190 | 4.042998  | 0.288409  |
| 29 | 6 | 0 | -0.127764 | -1.340330 | 0.077883  |
| 30 | 6 | 0 | 0.317531  | -1.839152 | -1.187750 |
| 31 | 6 | 0 | 0.088525  | -2.053470 | 1.297132  |
| 32 | 6 | 0 | 0.907289  | -3.095194 | -1.205228 |
| 33 | 6 | 0 | 0.687367  | -3.295832 | 1.210477  |
| 34 | 6 | 0 | 1.104152  | -3.837268 | -0.028243 |
| 35 | 1 | 0 | 1.239905  | -3.507457 | -2.152816 |
| 36 | 1 | 0 | 0.853804  | -3.868975 | 2.117947  |
| 37 | 6 | 0 | 0.151518  | -1.034446 | -2.441565 |
| 38 | 1 | 0 | -0.903066 | -0.799522 | -2.624508 |
| 39 | 1 | 0 | 0.692223  | -0.083594 | -2.384054 |
| 40 | 1 | 0 | 0.528397  | -1.591667 | -3.301687 |
| 41 | 6 | 0 | -0.342506 | -1.469560 | 2.611139  |
| 42 | 1 | 0 | 0.108174  | -0.484987 | 2.775308  |
| 43 | 1 | 0 | -1.430079 | -1.337657 | 2.644360  |
| 44 | 1 | 0 | -0.054370 | -2.124797 | 3.435633  |
| 45 | 6 | 0 | 1.758650  | -5.184840 | -0.068263 |
| 46 | 1 | 0 | 2.664980  | -5.189789 | 0.549720  |
| 47 | 1 | 0 | 1.092054  | -5.948815 | 0.350083  |
| 48 | 1 | 0 | 2.028691  | -5.475649 | -1.085503 |
| 49 | 5 | 0 | 2.797429  | 2.702974  | -2.315337 |
| 50 | 9 | 0 | 2.229182  | 3.513632  | -1.310104 |
| 51 | 1 | 0 | -2.188695 | 4.929586  | -0.314370 |
| 52 | 1 | 0 | -2.238603 | 4.272082  | 1.327287  |



**7-T1** (UB3LYP, singlet, freq)

|                                              |                             |
|----------------------------------------------|-----------------------------|
| Zero-point correction=                       | 0.405639 (Hartree/Particle) |
| Thermal correction to Energy=                | 0.433405                    |
| Thermal correction to Enthalpy=              | 0.434350                    |
| Thermal correction to Gibbs Free Energy=     | 0.344150                    |
| Sum of electronic and zero-point Energies=   | -1477.039721                |
| Sum of electronic and thermal Energies=      | -1477.011955                |
| Sum of electronic and thermal Enthalpies=    | -1477.011011                |
| Sum of electronic and thermal Free Energies= | -1477.101210                |
| SCF Done =                                   | -1477.44536031              |
